# Supplementary material for: Synthesis and structure–activity relationships of 3,4,5-trisubstituted-1,2,4-triazoles: high affinity and selective somatostatin receptor-4 agonists for Alzheimer's disease treatment
Source: Royal Society of Chemistry journal article supplement (doi:10.1039/d1md00044f), 2021-01-01
Supplement: d1md00044f2.pdf [file d1md00044f2.pdf]

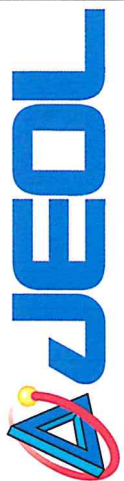

```

Filename = ID-102-45-Org-Bas-Pre
Author = Crider
Experiment = single_pulse.ex2
Sample_id = S#409225
Solvent = DMSO-D6
Creation_time = 7-JUN-2011 11:09:26
Revision_time = 17-MAR-2021 05:50:43
Current_time = 17-MAR-2021 09:50:46

Comment = single_pulse
Data_format = 1D COMPLEX
Dim_size = 13107
Dim_title = 1H
Dim_units = [ppm]
Dimensions = X
Site = ECS 400
Spectrometer = JNM-ECS400

Field_strength = 9.389766 [T] (400 [MHz])
X_acq_duration = 2.18365952 [s]
X_domain = 1H
X_freq = 399.78219838 [MHz]
X_offset = 5 [ppm]
X_points = 16384
X_prescans = 1
X_resolution = 0.45794685 [Hz]
X_sweep = 7.5030012 [kHz]
Irr_domain = 1H
Irr_freq = 399.78219838 [MHz]
Irr_offset = 5 [ppm]
Tri_domain = 1H
Tri_freq = 399.78219838 [MHz]
Tri_offset = 5 [ppm]
Clipped = FALSE
Mod_return = 1
Scans = 8
Total_scans = 8

X_90_width = 10.01791 [us]
X_acq_time = 2.18365952 [s]
X_angle = 45 [deg]
X_atn = 6 [dB]
X_pulse = 5.008955 [us]
Irr_mode = Off
Tri_mode = Off
Dante_presat = FALSE
Initial_wait = 1 [s]
Recvr_gain = 42
Relaxation_delay = 7.18365952 [s]
Repetition_time = 7.18365952 [s]
Temp_get = 19.3 [dC]
    
```

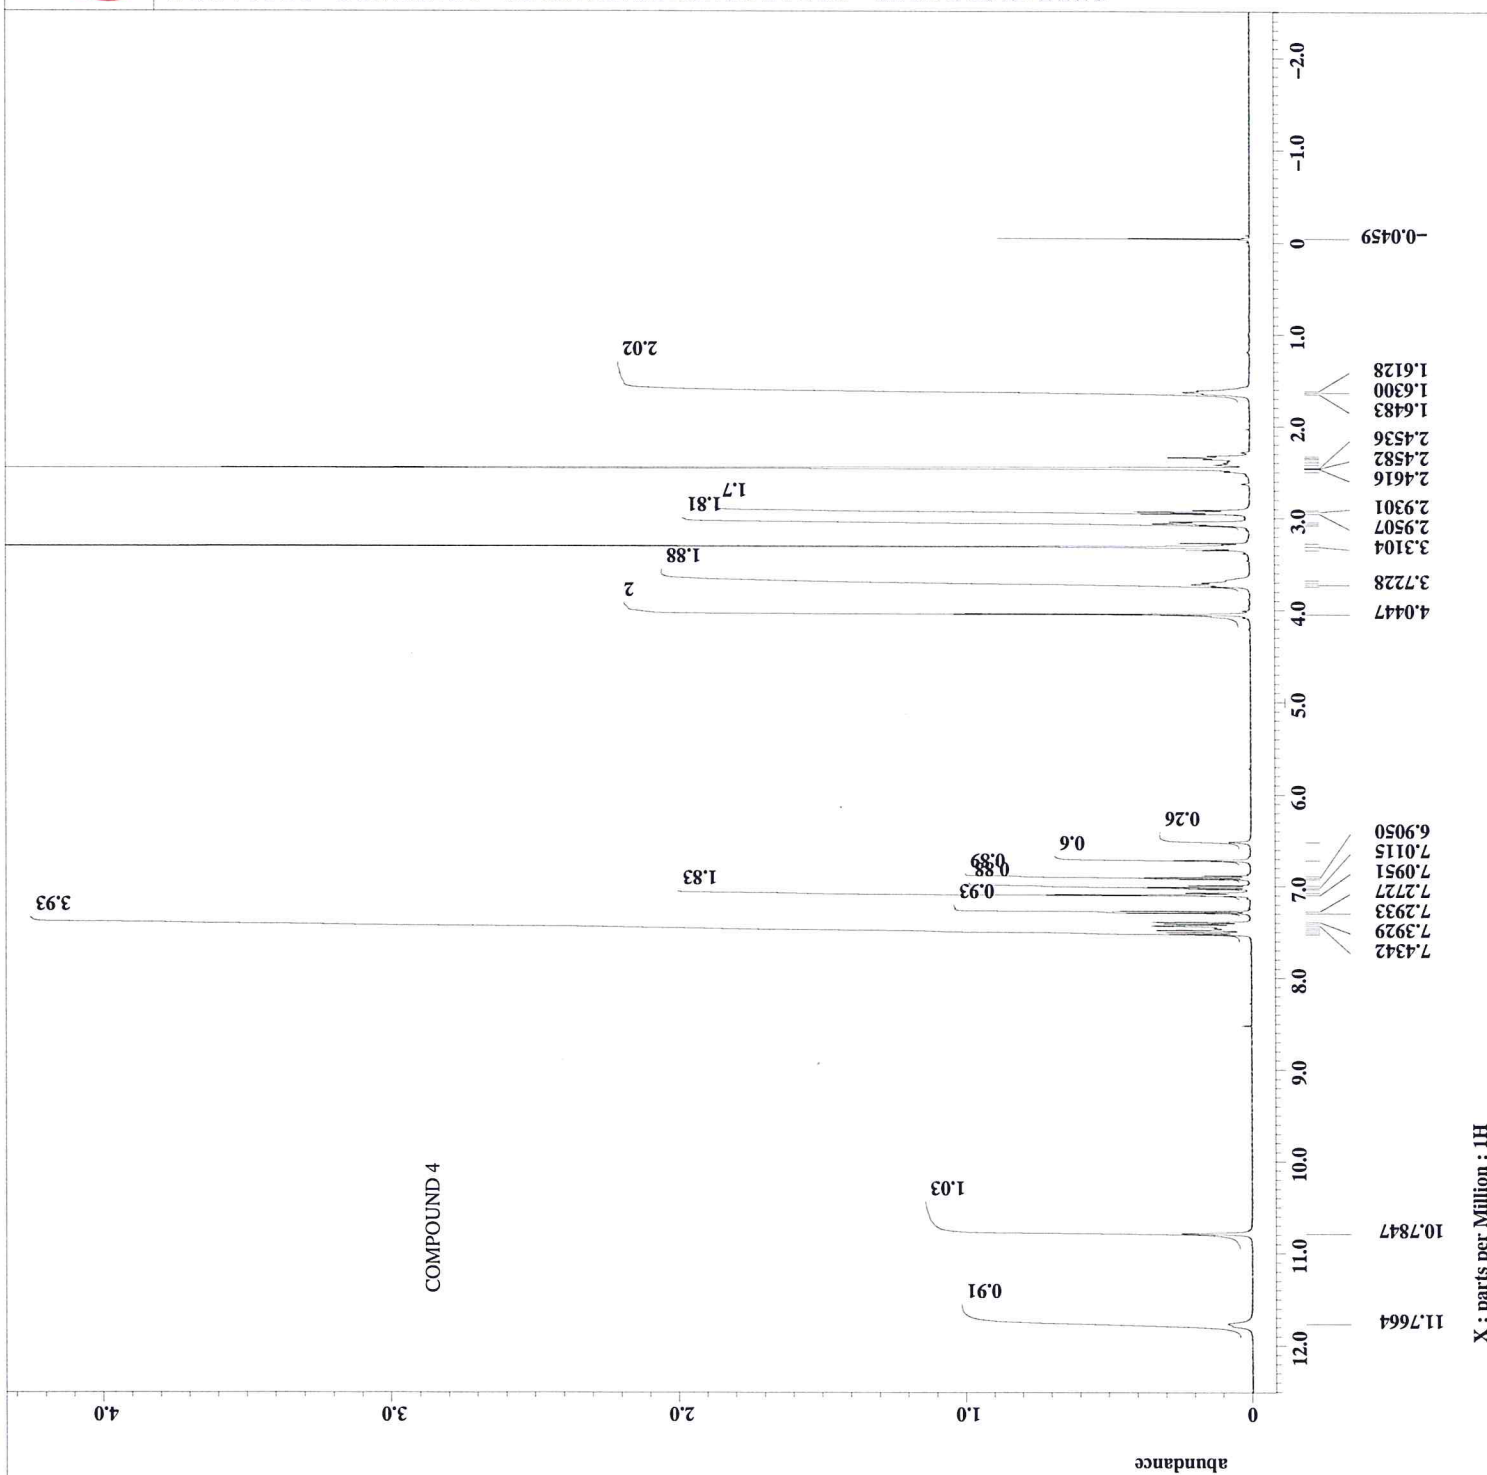

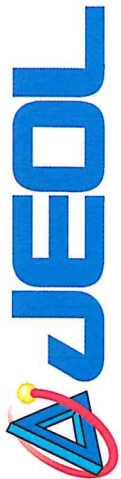

Filename = ID-102-45-Org-Bas-Pre  
Author = Criger  
Experiment = single\_pulse\_dec  
Sample\_id = S#410454  
Solvent = DMSO-D6  
Creation\_time = 7-JUN-2011 14:25:52  
Revision\_time = 17-MAR-2021 10:12:39  
Current\_time = 17-MAR-2021 10:12:43  
Comment = single pulse decouple  
Data\_format = 1D COMPLEX  
Dim\_size = 26214  
Dim\_title = 13C  
Dim\_units = [ppm]  
Dimensions = X  
Site = ECS 400  
Spectrometer = JNM-ECS400  
Field\_strength = 9.389766[T] (400[MHz])  
X\_acq\_duration = 1.04333312[is]  
X\_domain = 13C  
X\_freq = 100.52530333[MHz]  
X\_offset = 100[ppm]  
X\_points = 32768  
X\_prescans = 4  
X\_resolution = 0.95846665[Hz]  
X\_sweep = 31.40703518[KHz]  
Irr\_domain = 1H  
Irr\_freq = 399.78219838[MHz]  
Irr\_offset = 5[ppm]  
Clipped = FALSE  
Mod\_return = 1  
Scans = 3859  
Total\_scans = 3859  
X\_90\_width = 11.9[us]  
X\_acq\_time = 1.04333312[s]  
X\_angle = 30[deg]  
X\_atn = 9[db]  
X\_pulse = 3.96666667[us]  
Irr\_atn\_dec = 27[db]  
Irr\_atn\_noe = 27[db]  
Irr\_noise = WALTZ  
Decoupling = TRUE  
Initial\_wait = 1[s]  
Noe = TRUE  
Noe\_time = 2[s]  
Recvr\_gain = 60  
Relaxation\_delay = 2[s]  
Repetition\_time = 3.04333312[s]  
Temp\_get = 19.7[dc]

COMPOUND 4

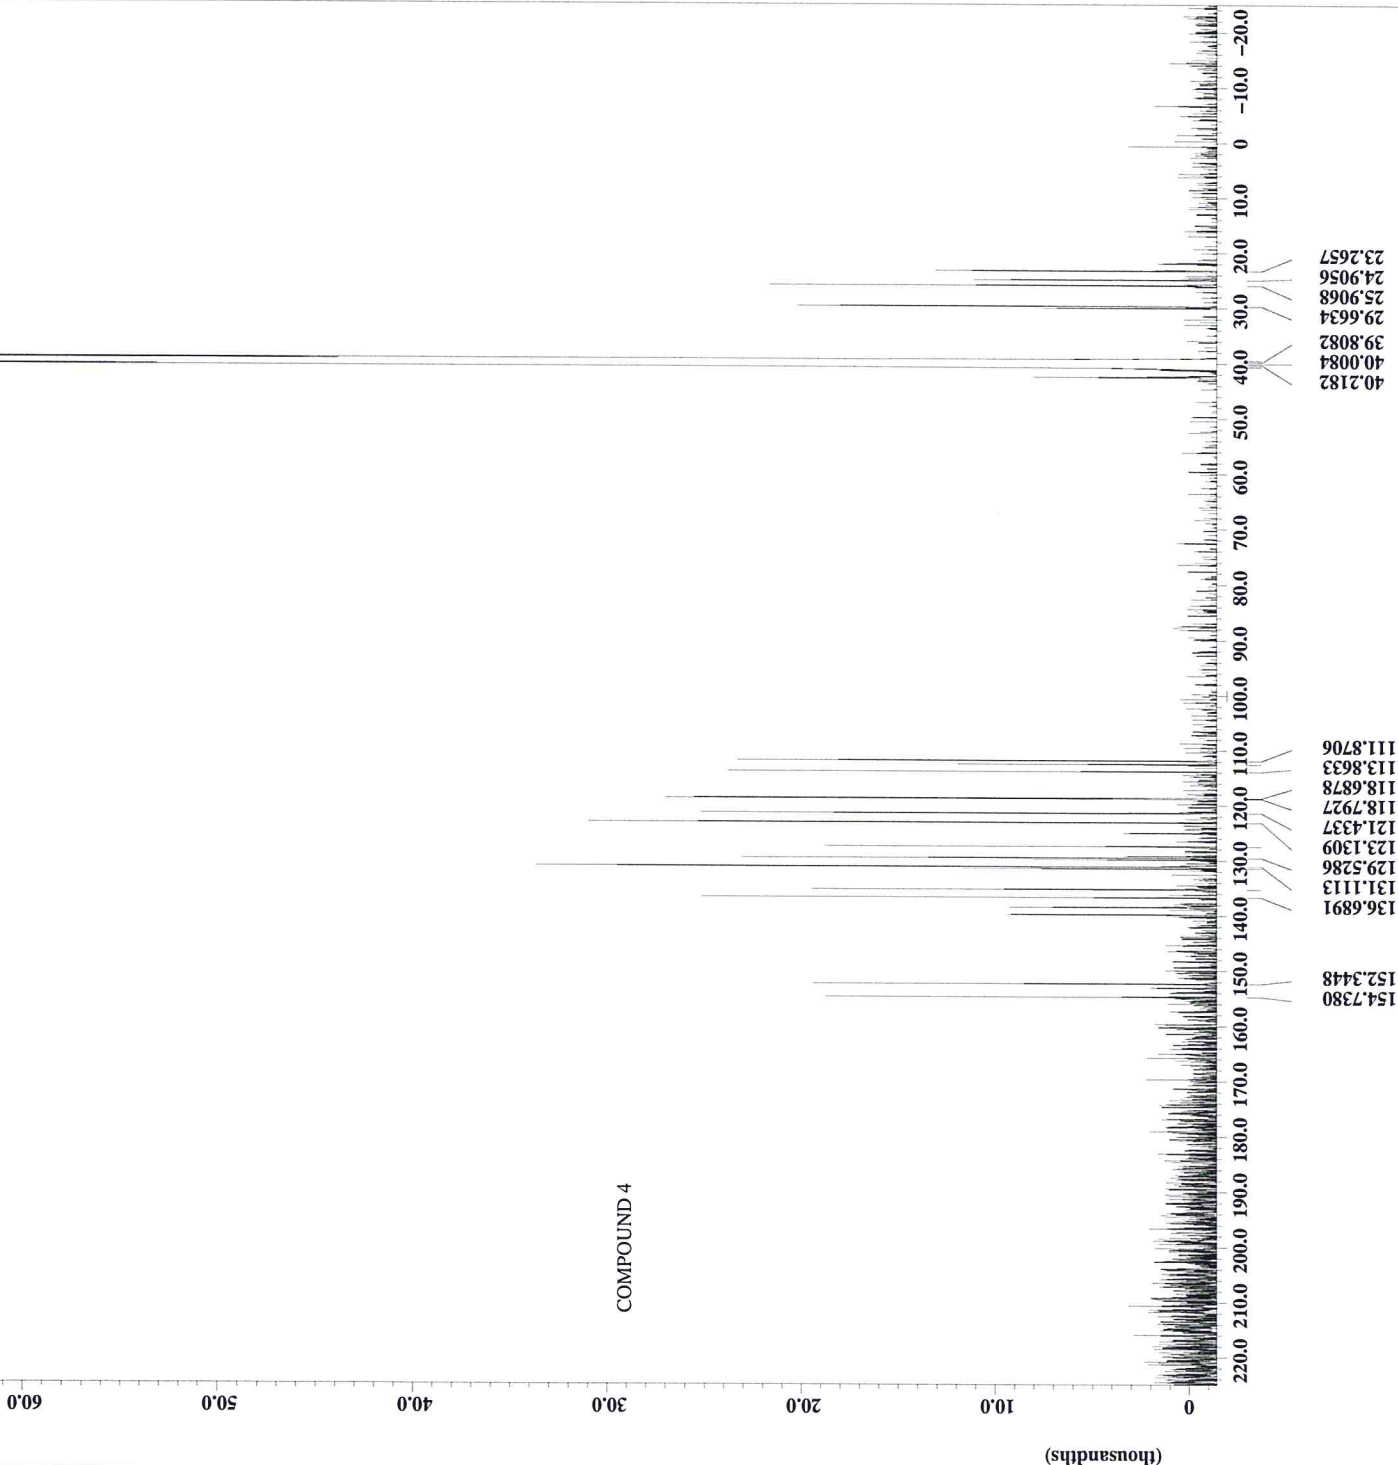

X : parts per Million : 13C



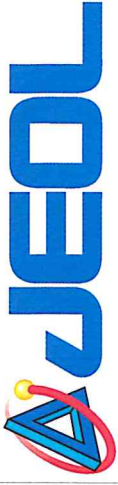

Filename = SM-I-26-1\_PROTON-5.jd  
Author = Delta  
Experiment = single\_pulse.exe  
Sample\_id = SM-I-26-1  
Solvent = DMSO-D6  
Creation\_time = 18-MAY-2016 17:11:50  
Revision\_time = 11-MAR-2021 08:38:06  
Current\_time = 11-MAR-2021 08:38:10  
Data\_format = 1D COMPLEX  
Dim\_size = 13107  
Dim\_title = 1H  
Dim\_units = [ppm]  
Dimensions = X  
Site = ECS 400  
Spectrometer = JNM-ECS400  
Field\_strength = 9.389766[T] (400 [MHz])  
X\_acq\_duration = 2.18365952[s]  
X\_domain = 1H  
X\_freq = 399.78219838 [MHz]  
X\_offset = 5 [ppm]  
X\_points = 16384  
X\_prescans = 1  
X\_resolution = 0.45794685 [Hz]  
X\_sweep = 7.5030012 [kHz]  
Irr\_domain = 1H  
Irr\_freq = 399.78219838 [MHz]  
Irr\_offset = 5 [ppm]  
Tri\_domain = 1H  
Tri\_freq = 399.78219838 [MHz]  
Tri\_offset = 5 [ppm]  
Clipped = FALSE  
Mod\_return = 1  
Scans = 16  
Total\_scans = 16  
X\_90\_width = 10.68 [us]  
X\_acq\_time = 2.18365952 [s]  
X\_angle = 45 [deg]  
X\_atn = 6 [dB]  
X\_pulse = 5.34 [us]  
Irr\_mode = Off  
Tri\_mode = Off  
Dante\_preset = FALSE  
Initial\_wait = 1 [s]  
Recvr\_gain = 40  
Relaxation\_delay = 4 [s]  
Repetition\_time = 6.18365952 [s]  
Temp\_get = 20.1 [dC]

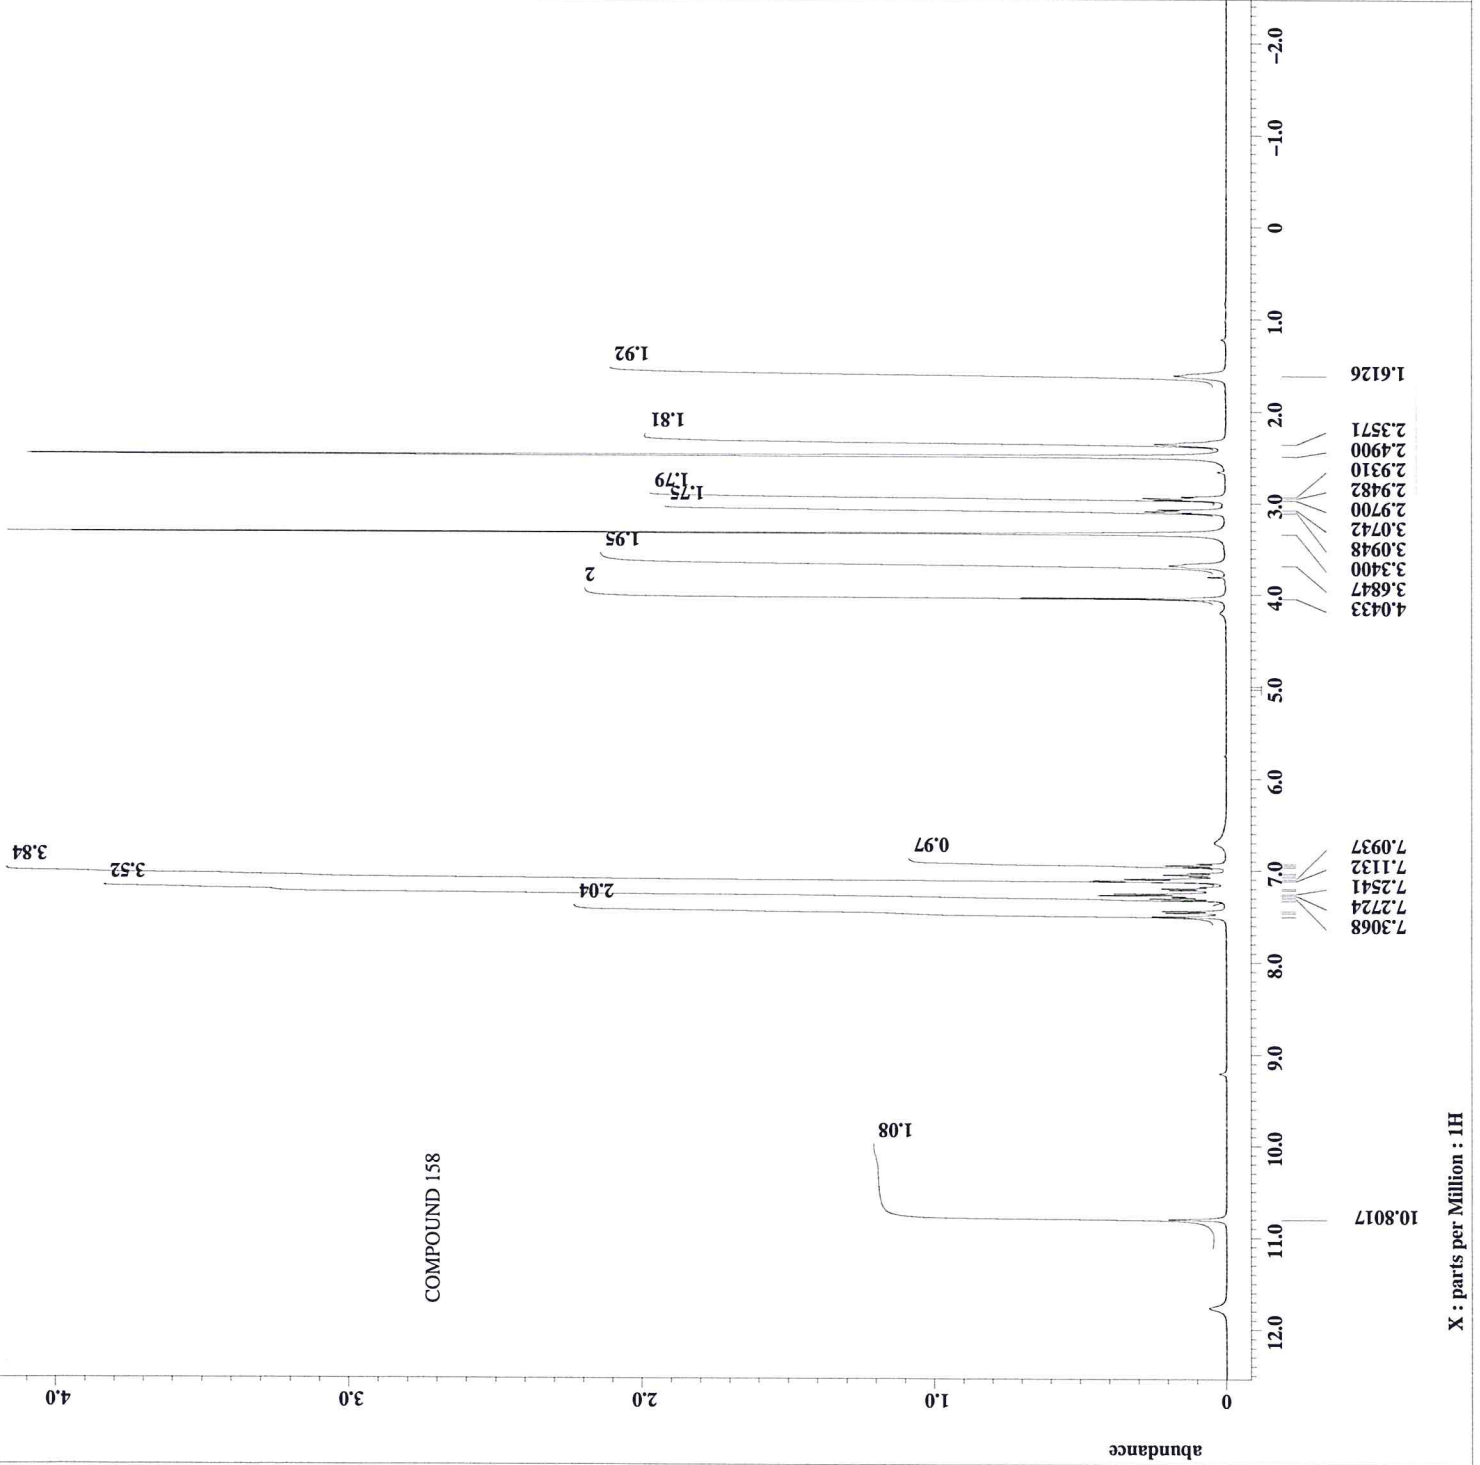

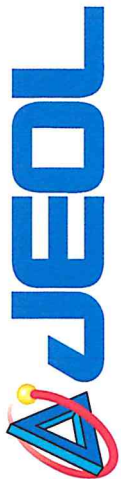

Filename = SM-I-26-1-CARBON-5.jd  
Author = Delta  
Experiment = single\_pulse\_dec  
Sample\_id = SM-I-26-1  
Solvent = DMSO-D6  
Creation\_time = 19-MAY-2016 04:45:05  
Revision\_time = 11-MAR-2021 08:41:15  
Current\_time = 11-MAR-2021 08:41:19  
Data\_format = 1D COMPLEX  
Dim\_size = 26214  
Dim\_title = 13C  
Dim\_units = Lppm  
Dimensions = X  
Site = ECS 400  
Spectrometer = JNM-ECS400  
Field\_strength = 9.389766[T] (400 [MHz])  
X\_acq\_duration = 1.04333312[s]  
X\_domain = 13C  
X\_freq = 100.52530333 [MHz]  
X\_offset = 100 [ppm]  
X\_points = 32768  
X\_prescans = 4  
X\_resolution = 0.95846665 [Hz]  
X\_sweep = 31.40703518 [kHz]  
Irr\_domain = 1H  
Irr\_freq = 399.78219838 [MHz]  
Irr\_offset = 5 [ppm]  
Clipped = FALSE  
Mod\_return = 1  
Scans = 10240  
Total\_scans = 10240  
X\_90\_width = 12.84 [us]  
X\_acq\_time = 1.04333312[s]  
X\_angle = 30 [deg]  
X\_atn = 9 [dB]  
X\_pulse = 4.28 [us]  
Irr\_atn\_dec = 27 [dB]  
Irr\_atn\_noe = 27 [dB]  
Irr\_noise = WALTZ  
Decoupling = TRUE  
Initial\_wait = 1 [s]  
Noe = TRUE  
Noe\_time = 3 [s]  
Recvr\_gain = 60  
Relaxation\_delay = 3 [s]  
Repetition\_time = 4.04333312[s]  
Temp\_get = 19.6 [dC]

COMPOUND 158

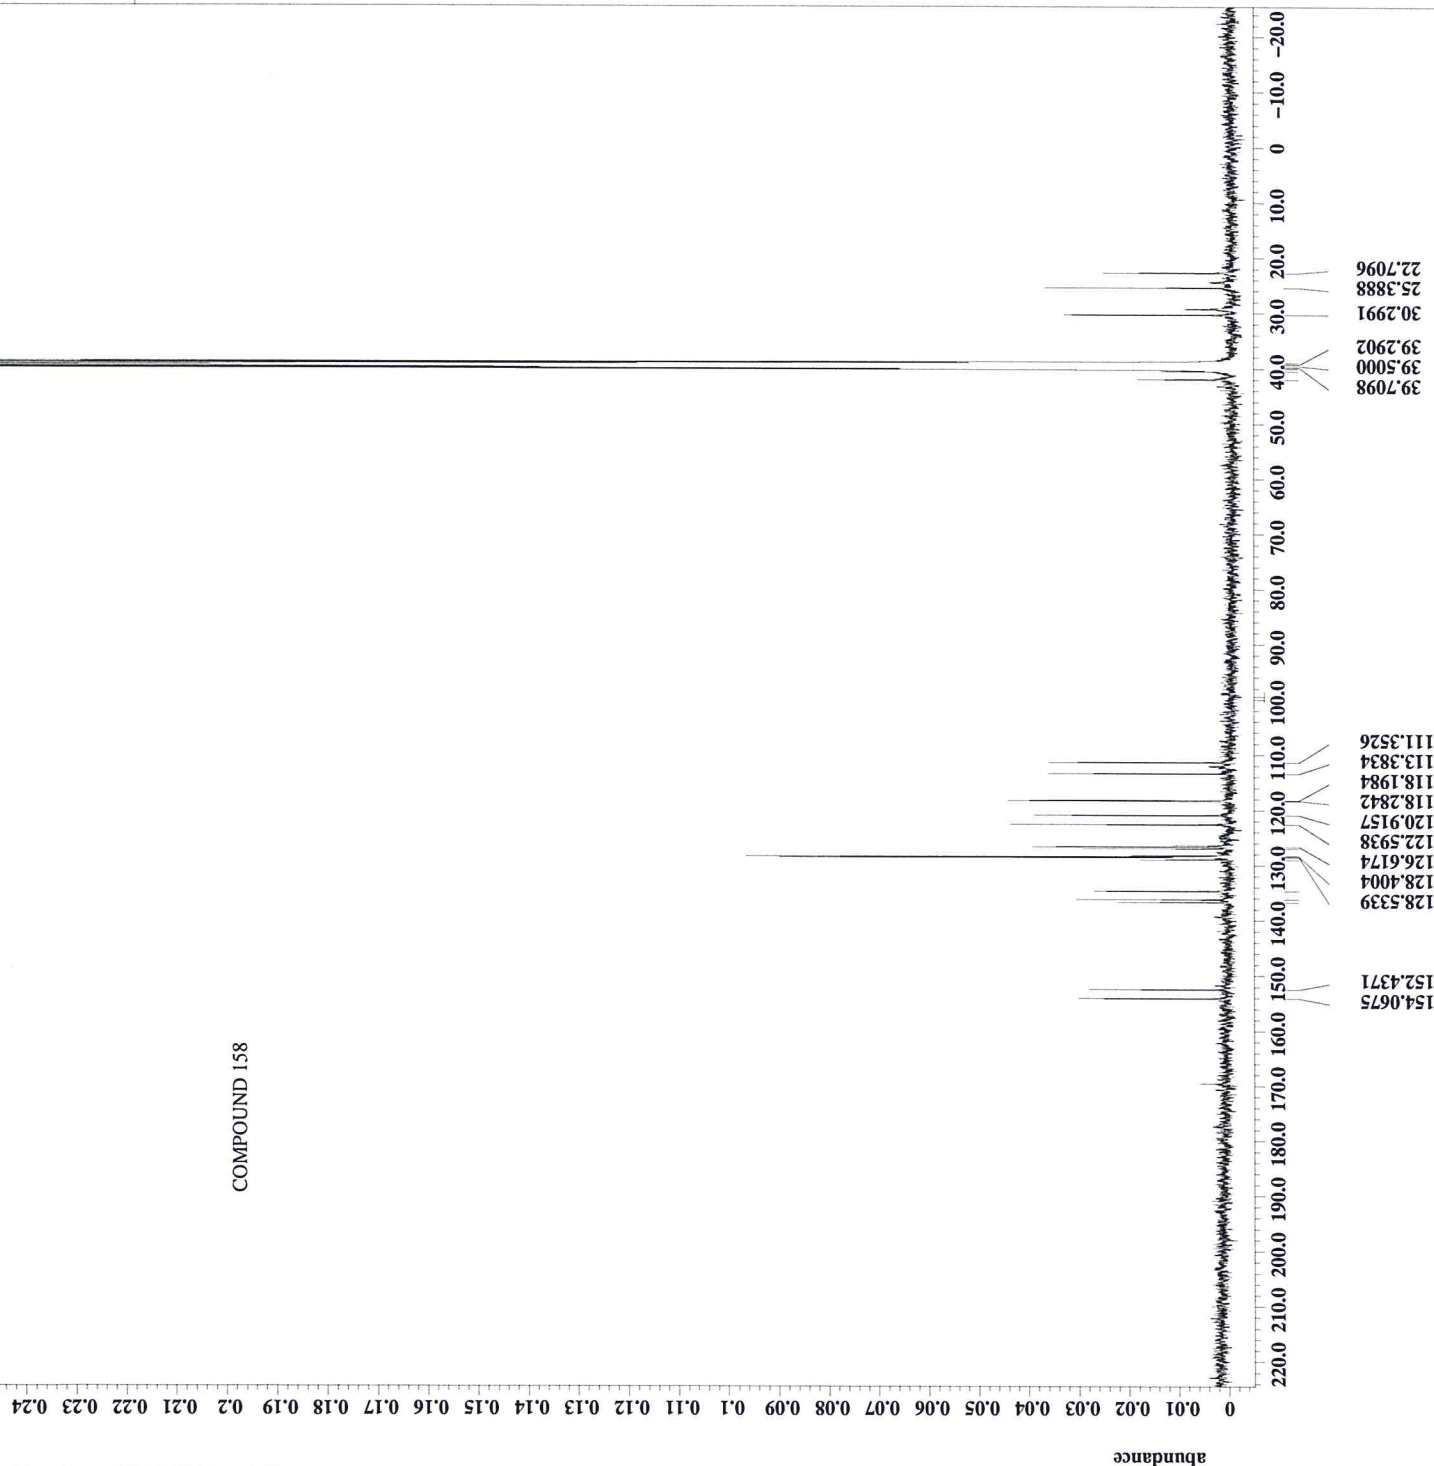

X : parts per Million : 13C

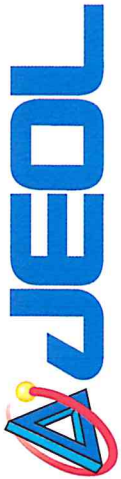

Filename = SM-I-38-F1-3\_PROTON-6  
Author = Delta  
Experiment = single\_pulse.ex2  
Sample\_id = SM-I-38-F1-3  
Solvent = DMSO-D6  
Creation\_time = 31-MAY-2016 17:08:04  
Revision\_time = 17-MAR-2021 13:56:25  
Current\_time = 17-MAR-2021 13:56:29  
Data\_format = 1D COMPLEX  
Dim\_size = 13107  
Dim\_title = 1H  
Dim\_units = [ppm]  
Dimensions = X  
Site = ECS 400  
Spectrometer = JNM-ECS400  
Field\_strength = 9.389766[T] (400 [MHz])  
X\_acq\_duration = 2.18365952[s]  
X\_domain = 1H  
X\_freq = 399.78219838 [MHz]  
X\_offset = 5 [ppm]  
X\_points = 16384  
X\_prescans = 1  
X\_resolution = 0.45794685 [Hz]  
X\_sweep = 7.5030012 [kHz]  
Irr\_domain = 1H  
Irr\_freq = 399.78219838 [MHz]  
Irr\_offset = 5 [ppm]  
Tri\_domain = 1H  
Tri\_freq = 399.78219838 [MHz]  
Tri\_offset = 5 [ppm]  
Clipped = FALSE  
Mod\_return = 1  
Scans = 16  
Total\_scans = 16  
X\_90\_width = 10.68 [us]  
X\_acq\_time = 2.18365952 [s]  
X\_angle = 45 [deg]  
X\_atn = 6 [dB]  
X\_pulse = 5.34 [us]  
Irr\_mode = Off  
Tri\_mode = Off  
Dante\_preset = FALSE  
Initial\_wait = 1 [s]  
Recvr\_gain = 36  
Relaxation\_delay = 4 [s]  
Repetition\_time = 6.18365952 [s]  
Temp\_get = 20.5 [dC]

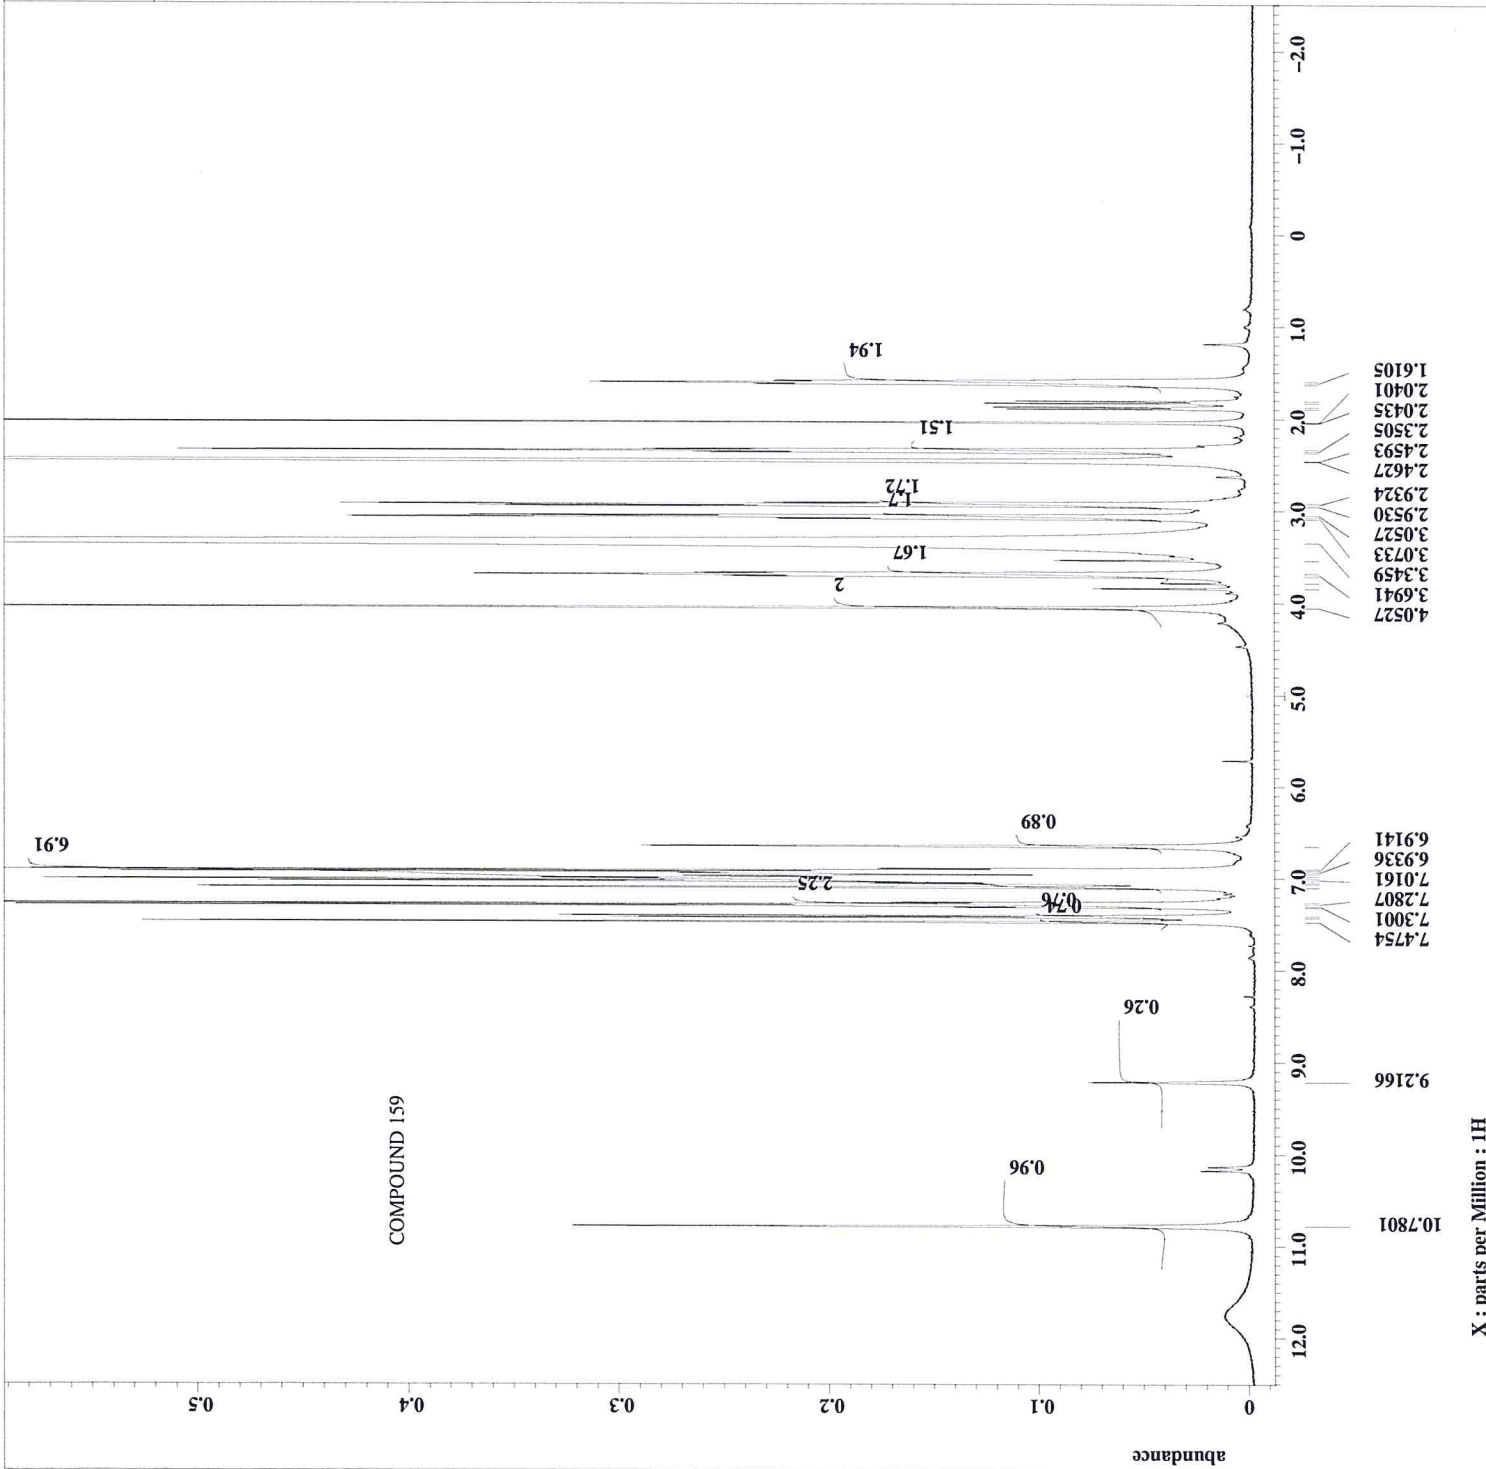

X : parts per Million : 1H

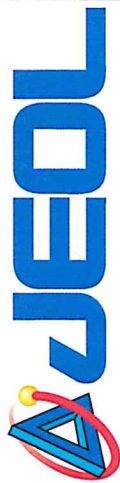

File name = SM-I-38-F1-2\_CARBON-6  
Author = Delta  
Experiment = single\_pulse\_dec  
Sample\_id = SM-I-38-F1-2  
Solvent = DMSO-D6  
Creation time = 14-MAY-2016 03:13:31  
Revision time = 10-MAR-2021 16:55:00  
Current\_time = 10-MAR-2021 16:55:04  
Data\_format = 1D COMPLEX  
Dim\_size = 26214  
Dim\_title = 13C  
Dim\_units = [ppm]  
Dimensions = X  
Site = ECS 400  
Spectrometer = JNM-ECS400  
Field\_strength = 9.389766 [T] (400 [MHz])  
X\_acq\_duration = 1.04333312 [s]  
X\_domain = 13C  
X\_freq = 100.52530333 [MHz]  
X\_offset = 100 [ppm]  
X\_points = 32768  
X\_prescans = 4  
X\_resolution = 0.95846665 [Hz]  
X\_sweep = 31.40703518 [kHz]  
Irr\_domain = 1H  
Irr\_freq = 399.78219838 [MHz]  
Irr\_offset = 5 [ppm]  
Clipped = FALSE  
Mod\_return = 1  
Scans = 10240  
Total\_scans = 10240  
X\_90\_width = 12.84 [us]  
X\_acq\_time = 1.04333312 [s]  
X\_angle = 30 [deg]  
X\_atn = 9 [dB]  
X\_pulse = 4.28 [us]  
Irr\_atn\_dec = 27 [dB]  
Irr\_atn\_noe = 27 [dB]  
Irr\_noise = WALTZ  
Decoupling = TRUE  
Initial\_wait = 1 [s]  
Noe = TRUE  
Noe\_time = 3 [s]  
Recvr\_gain = 60  
Relaxation\_delay = 3 [s]  
Repetition\_time = 4.04333312 [s]  
Temp\_get = 20.7 [dC]

COMPOUND 159

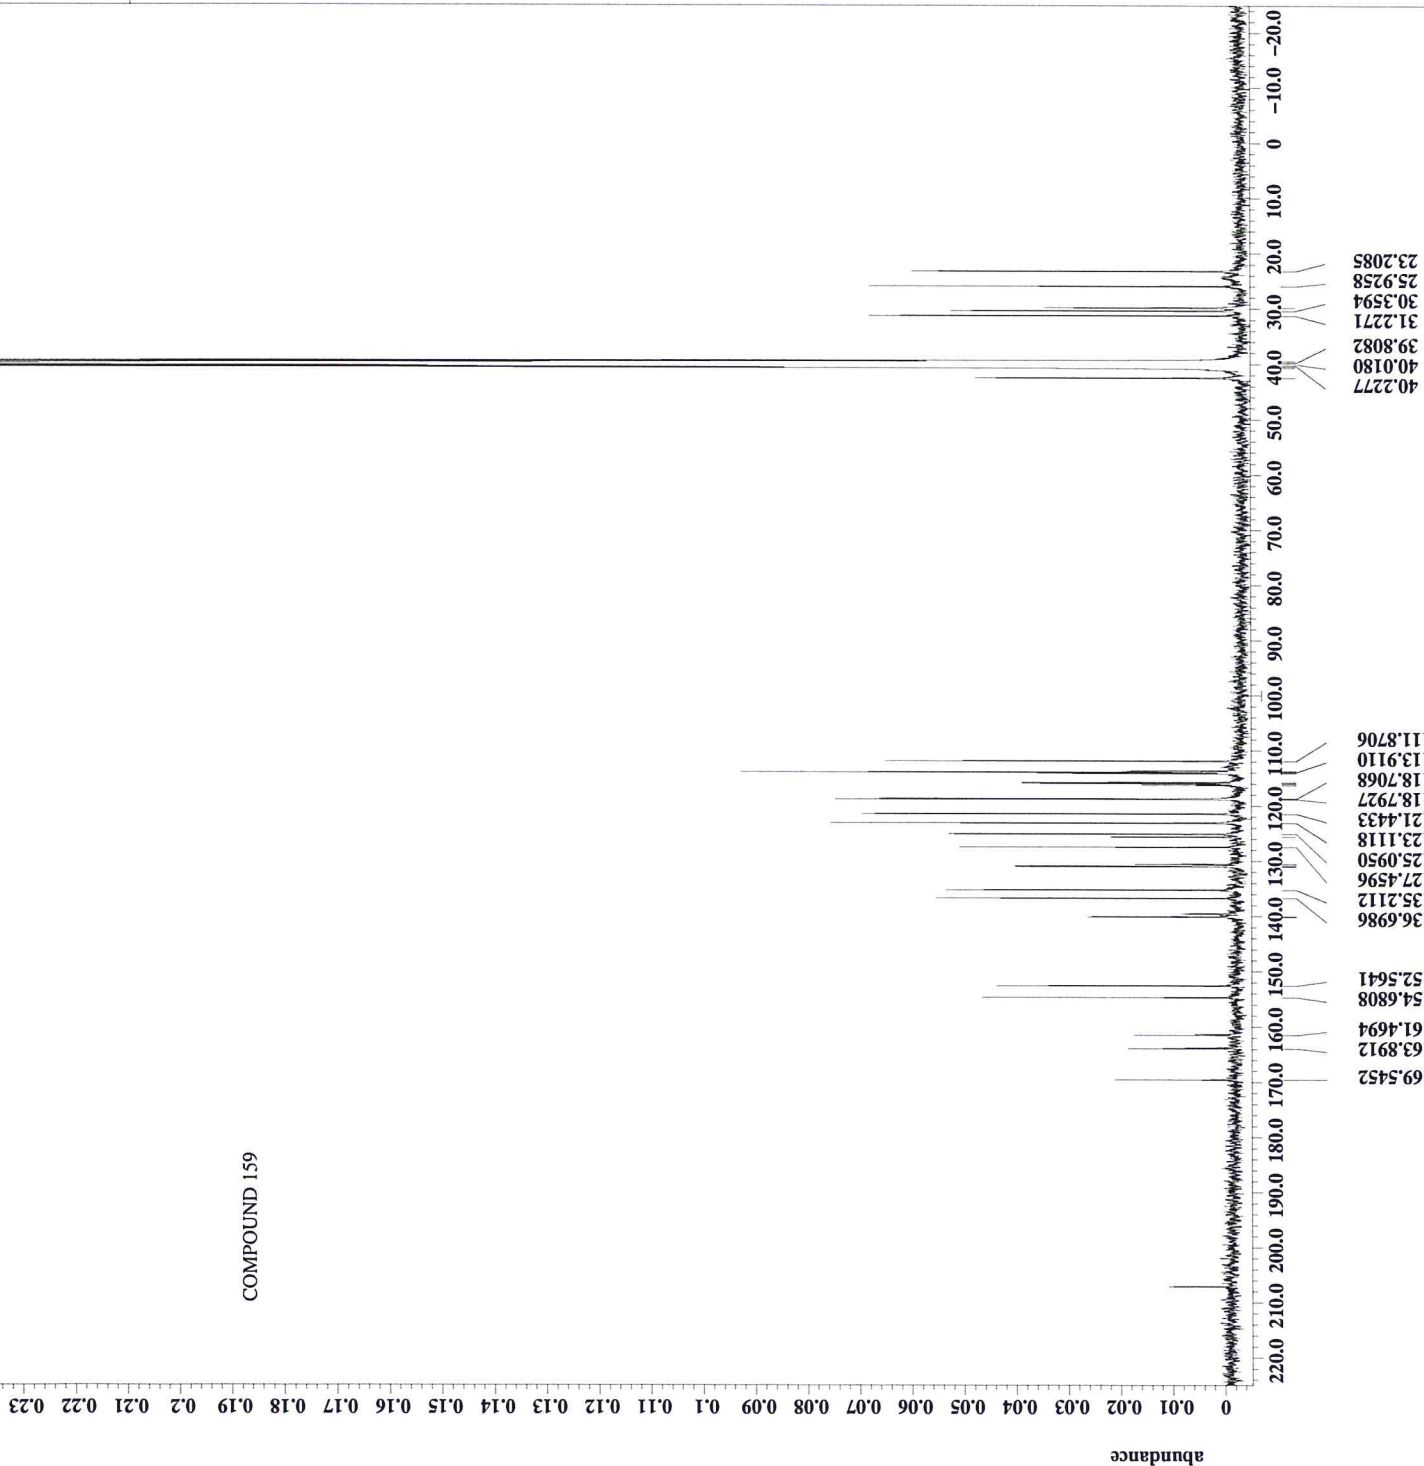

X : parts per Million : 13C



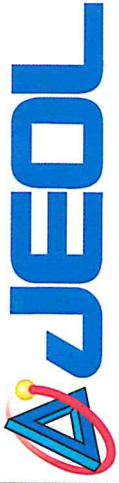

Filename = SM-I-55-F2\_PROTON-4.j  
Author = Delta  
Experiment = single\_pulse.ex2  
Sample\_id = SM-I-55-F2  
Solvent = DMSO-D6  
Creation\_time = 15-MAY-2016 13:04:47  
Revision\_time = 11-MAR-2021 09:00:53  
Current\_time = 11-MAR-2021 09:00:57  
Data\_format = 1D COMPLEX  
Dim\_size = 13107  
Dim\_title = 1H  
Dim\_units = [ppm]  
Dimensions = X  
Site = ECS 400  
Spectrometer = JNM-ECS400  
Field\_strength = 9.389766[T] (400 [MHz])  
X\_acq\_duration = 2.18365952[s]  
X\_domain = 1H  
X\_freq = 399.78219838 [MHz]  
X\_offset = 5 [ppm]  
X\_points = 16384  
X\_prescans = 1  
X\_resolution = 0.45794685 [Hz]  
X\_sweep = 7.5030012 [KHz]  
Irr\_domain = 1H  
Irr\_freq = 399.78219838 [MHz]  
Irr\_offset = 5 [ppm]  
Tri\_domain = 1H  
Tri\_freq = 399.78219838 [MHz]  
Tri\_offset = 5 [ppm]  
Clipped = FALSE  
Mod\_return = 1  
Scans = 16  
Total\_scans = 16  
X\_90\_width = 10.68 [us]  
X\_acq\_time = 2.18365952 [s]  
X\_angle = 45 [deg]  
X\_atn = 6 [dB]  
X\_pulse = 5.34 [us]  
Irr\_mode = Off  
Tri\_mode = Off  
Date\_preat = FALSE  
Initial\_wait = 1 [s]  
Recvr\_gain = 42  
Relaxation\_delay = 4 [s]  
Repetition\_time = 6.18365952 [s]  
Temp\_get = 19.9 [dC]

COMPOUND 160

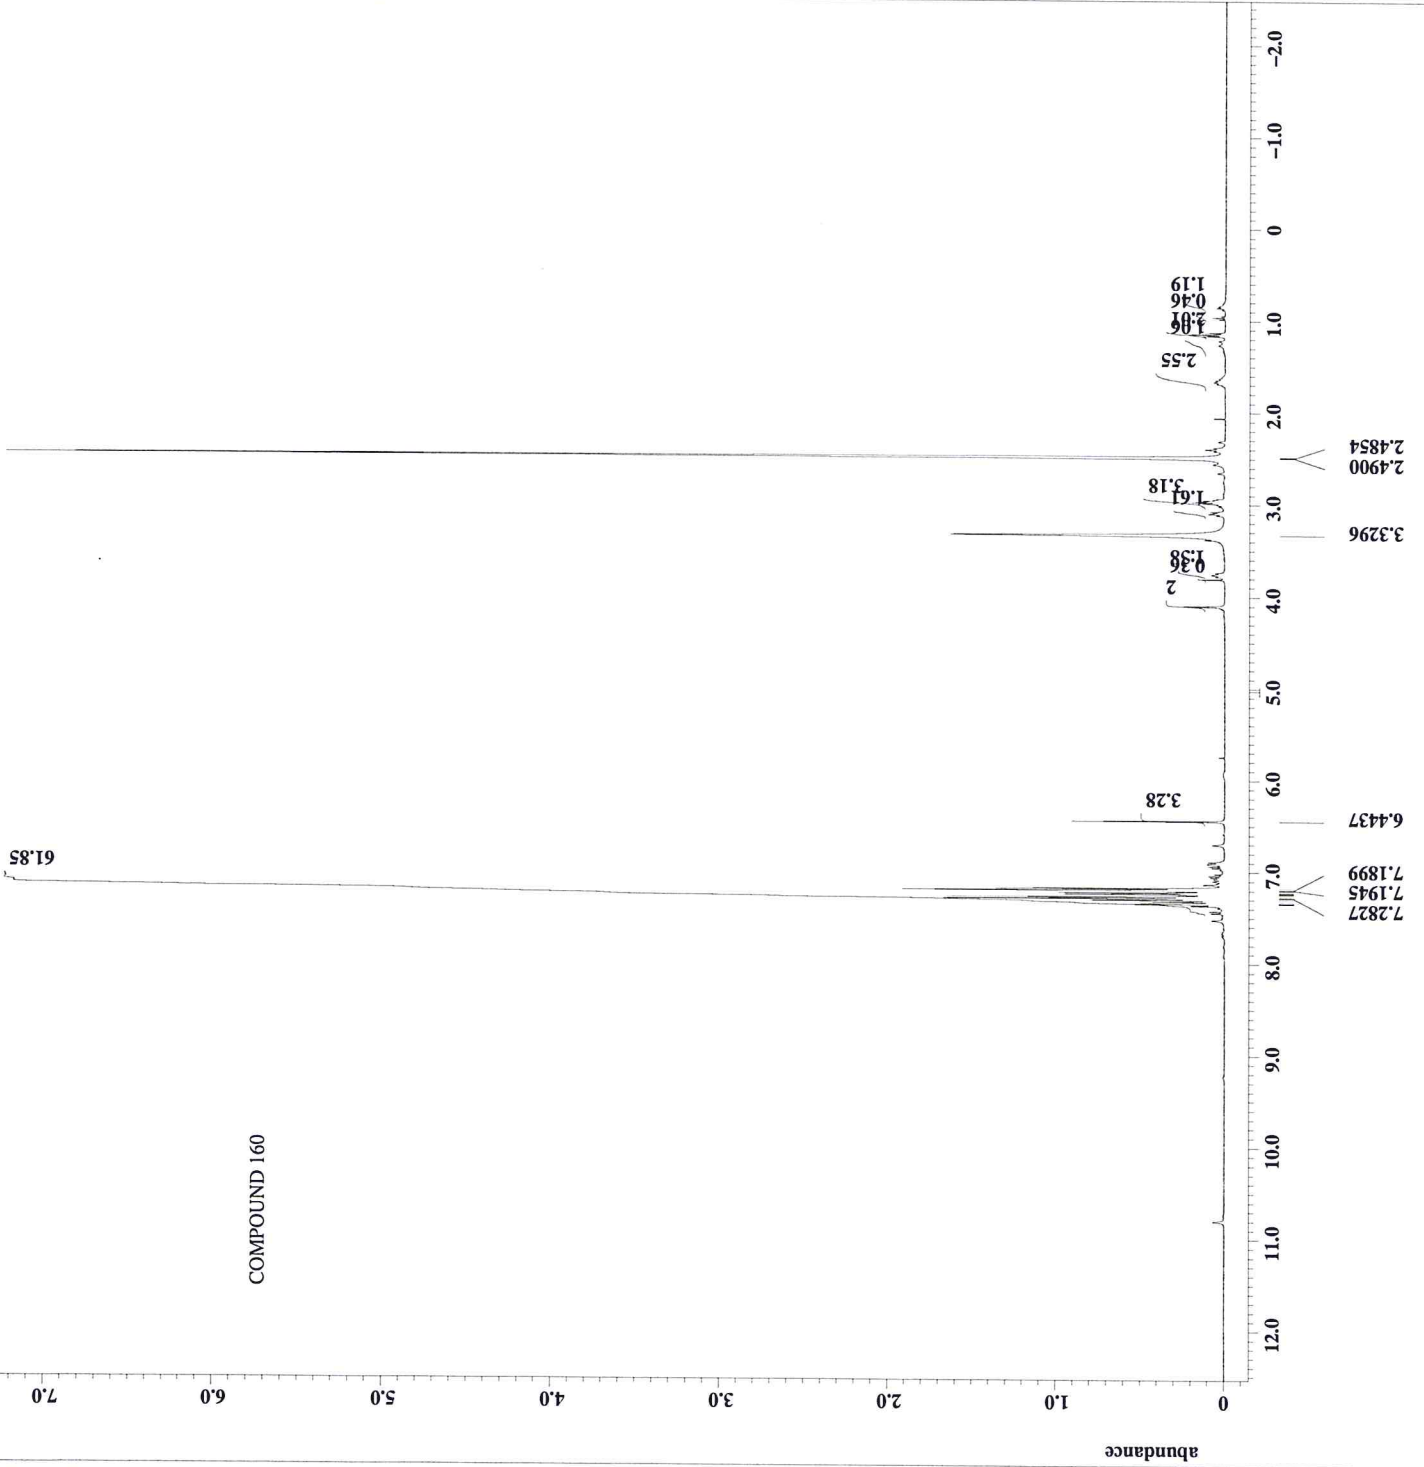

X : parts per Million : 1H

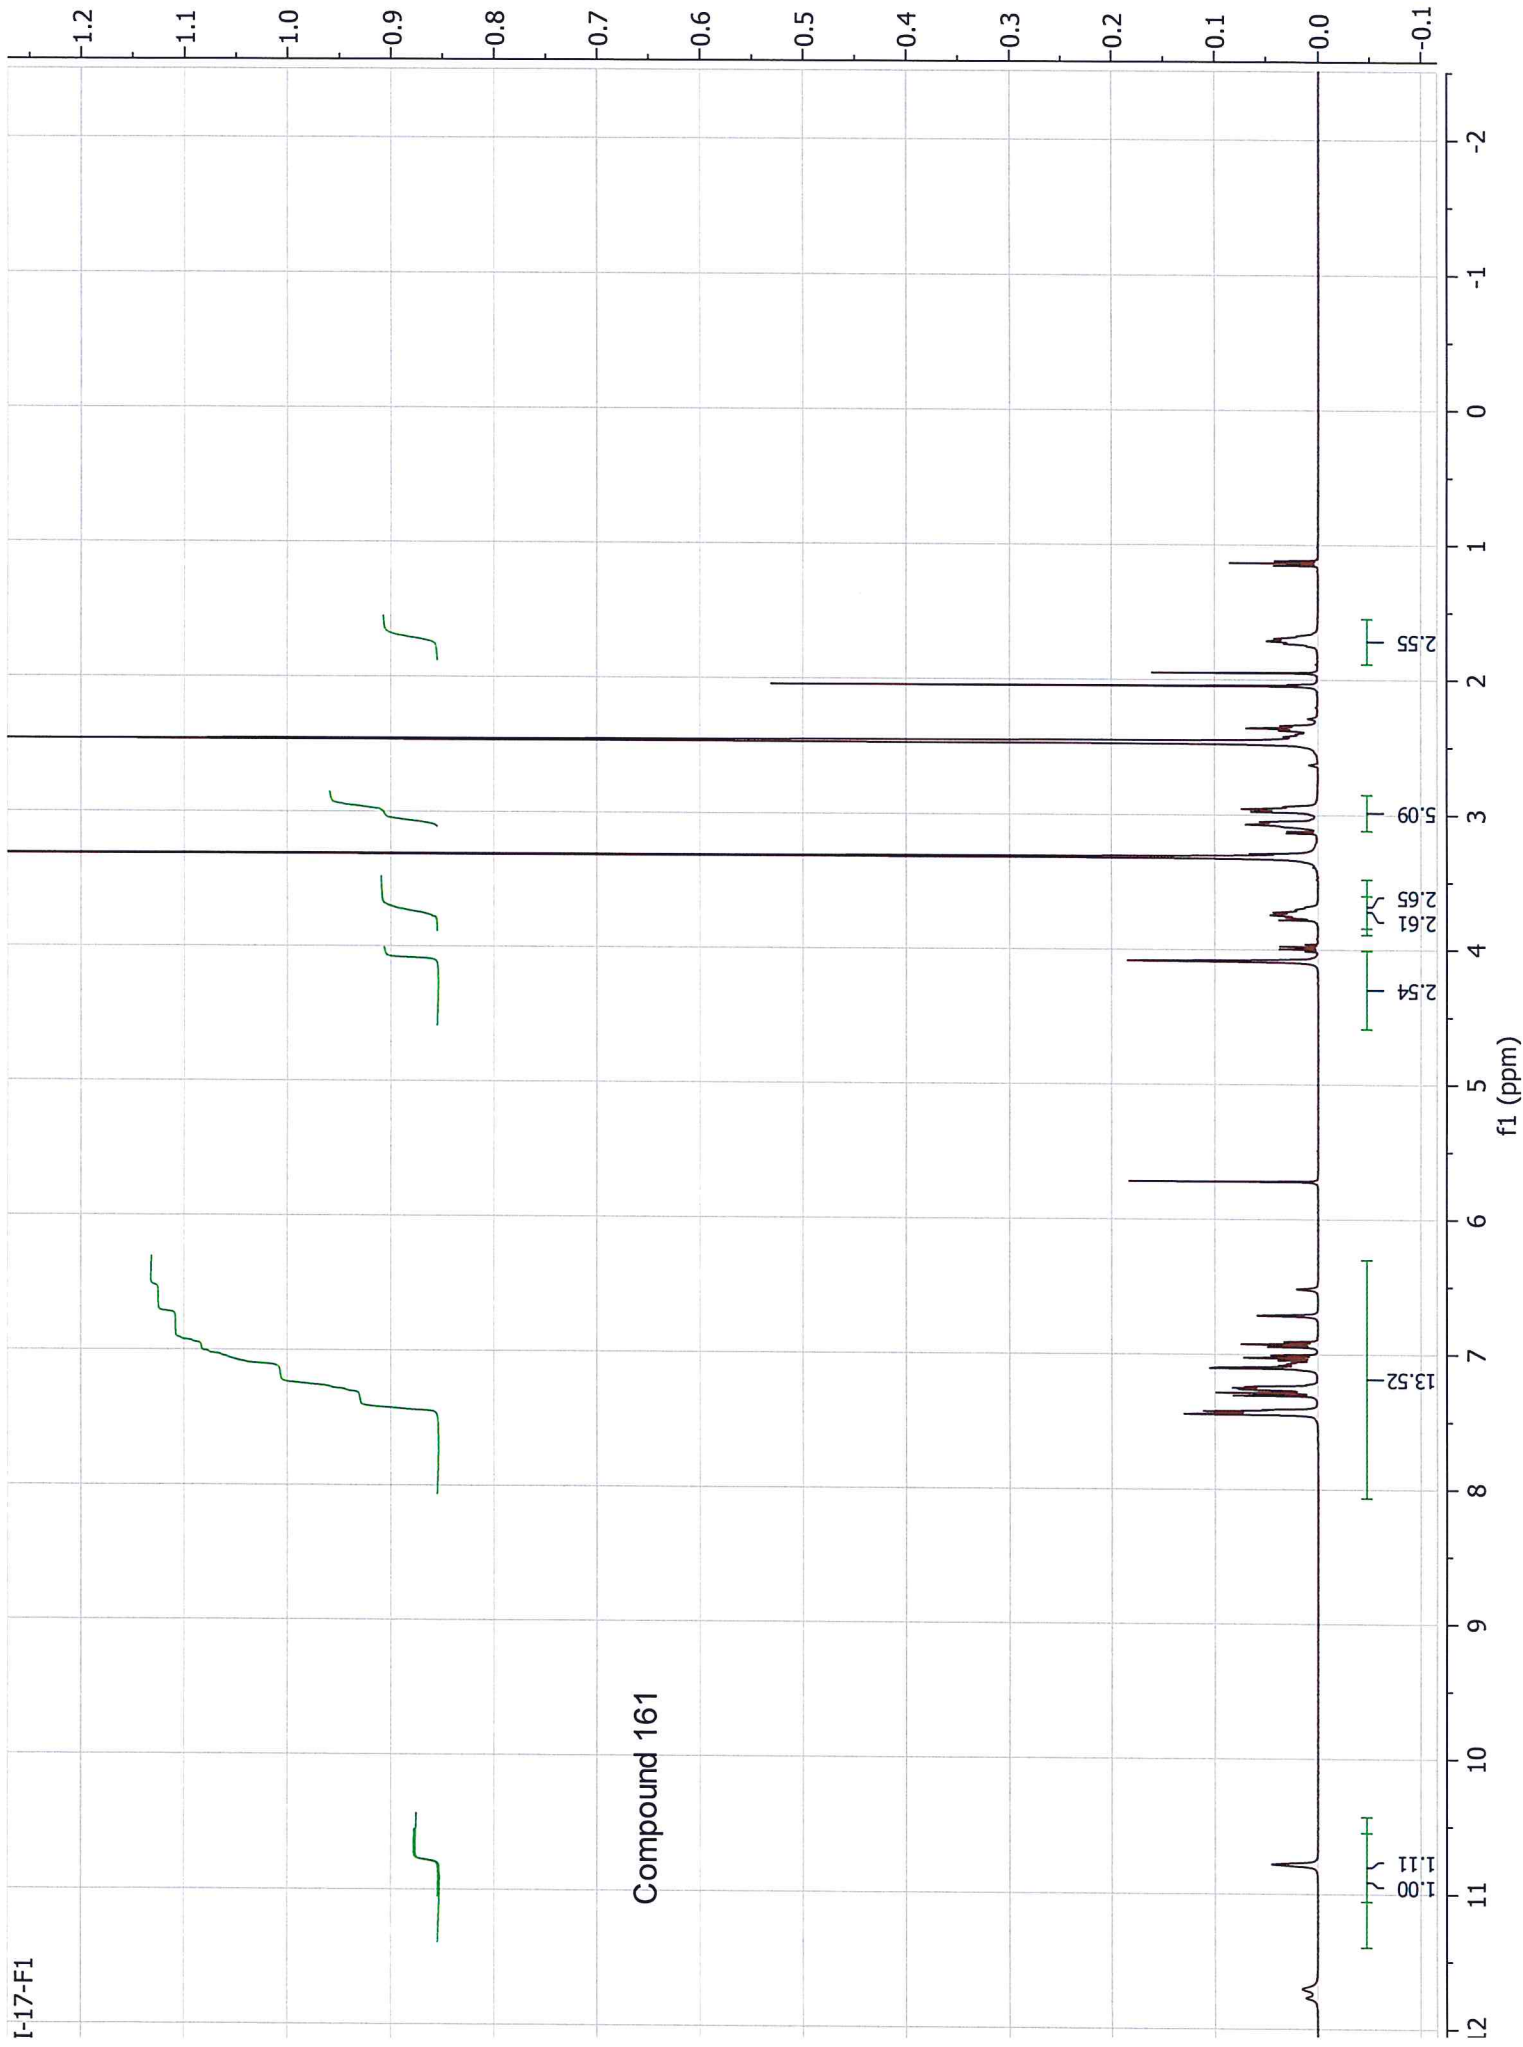

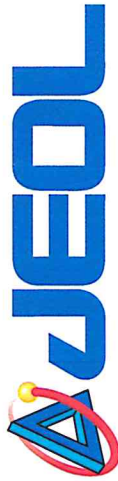

COMPOUND 161

Filename = MM-I-17-F1\_CARBON-7.j  
Author = Delta  
Experiment = single\_pulse\_dec  
Sample\_id = MM-I-17-F1  
Solvent = DMSO-D6  
Creation\_time = 25-APR-2016 07:39:46  
Revision\_time = 10-MAR-2021 11:47:17  
Current\_time = 10-MAR-2021 11:47:24  
Data\_format = 1D COMPLEX  
Dim\_size = 26214  
Dim\_title = 13C  
Dim\_units = [ppm]  
Dimensions = X  
Site = ECS 400  
Spectrometer = JNM-ECS400  
Field\_strength = 9.389766 [T] (400 [MHz])  
X\_acq\_duration = 1.0433312 [s]  
X\_domain = 13C  
X\_freq = 100.52530333 [MHz]  
X\_offset = 100 [ppm]  
X\_points = 32768  
X\_prescans = 4  
X\_resolution = 0.95846665 [Hz]  
X\_sweep = 31.40703518 [kHz]  
Irr\_domain = 1H  
Irr\_freq = 399.78219838 [MHz]  
Irr\_offset = 5 [ppm]  
Clipped = TRUE  
Mod\_return = 1  
Scans = 56507.0  
Total\_scans = 56507.0  
X\_90\_width = 12.84 [us]  
X\_acq\_time = 1.0433312 [s]  
X\_angle = 30 [deg]  
X\_atn = 9 [dB]  
X\_pulse = 4.28 [us]  
Irr\_atn\_dec = 27 [dB]  
Irr\_atn\_noe = 27 [dB]  
Irr\_noise = WALTZ  
Decoupling = TRUE  
Initial\_wait = 1 [s]  
Noe = TRUE  
Noe\_time = 3 [s]  
Recvr\_gain = 60  
Relaxation\_delay = 3 [s]  
Repetition\_time = 4.0433312 [s]  
Temp\_get = 20.9 [dC]

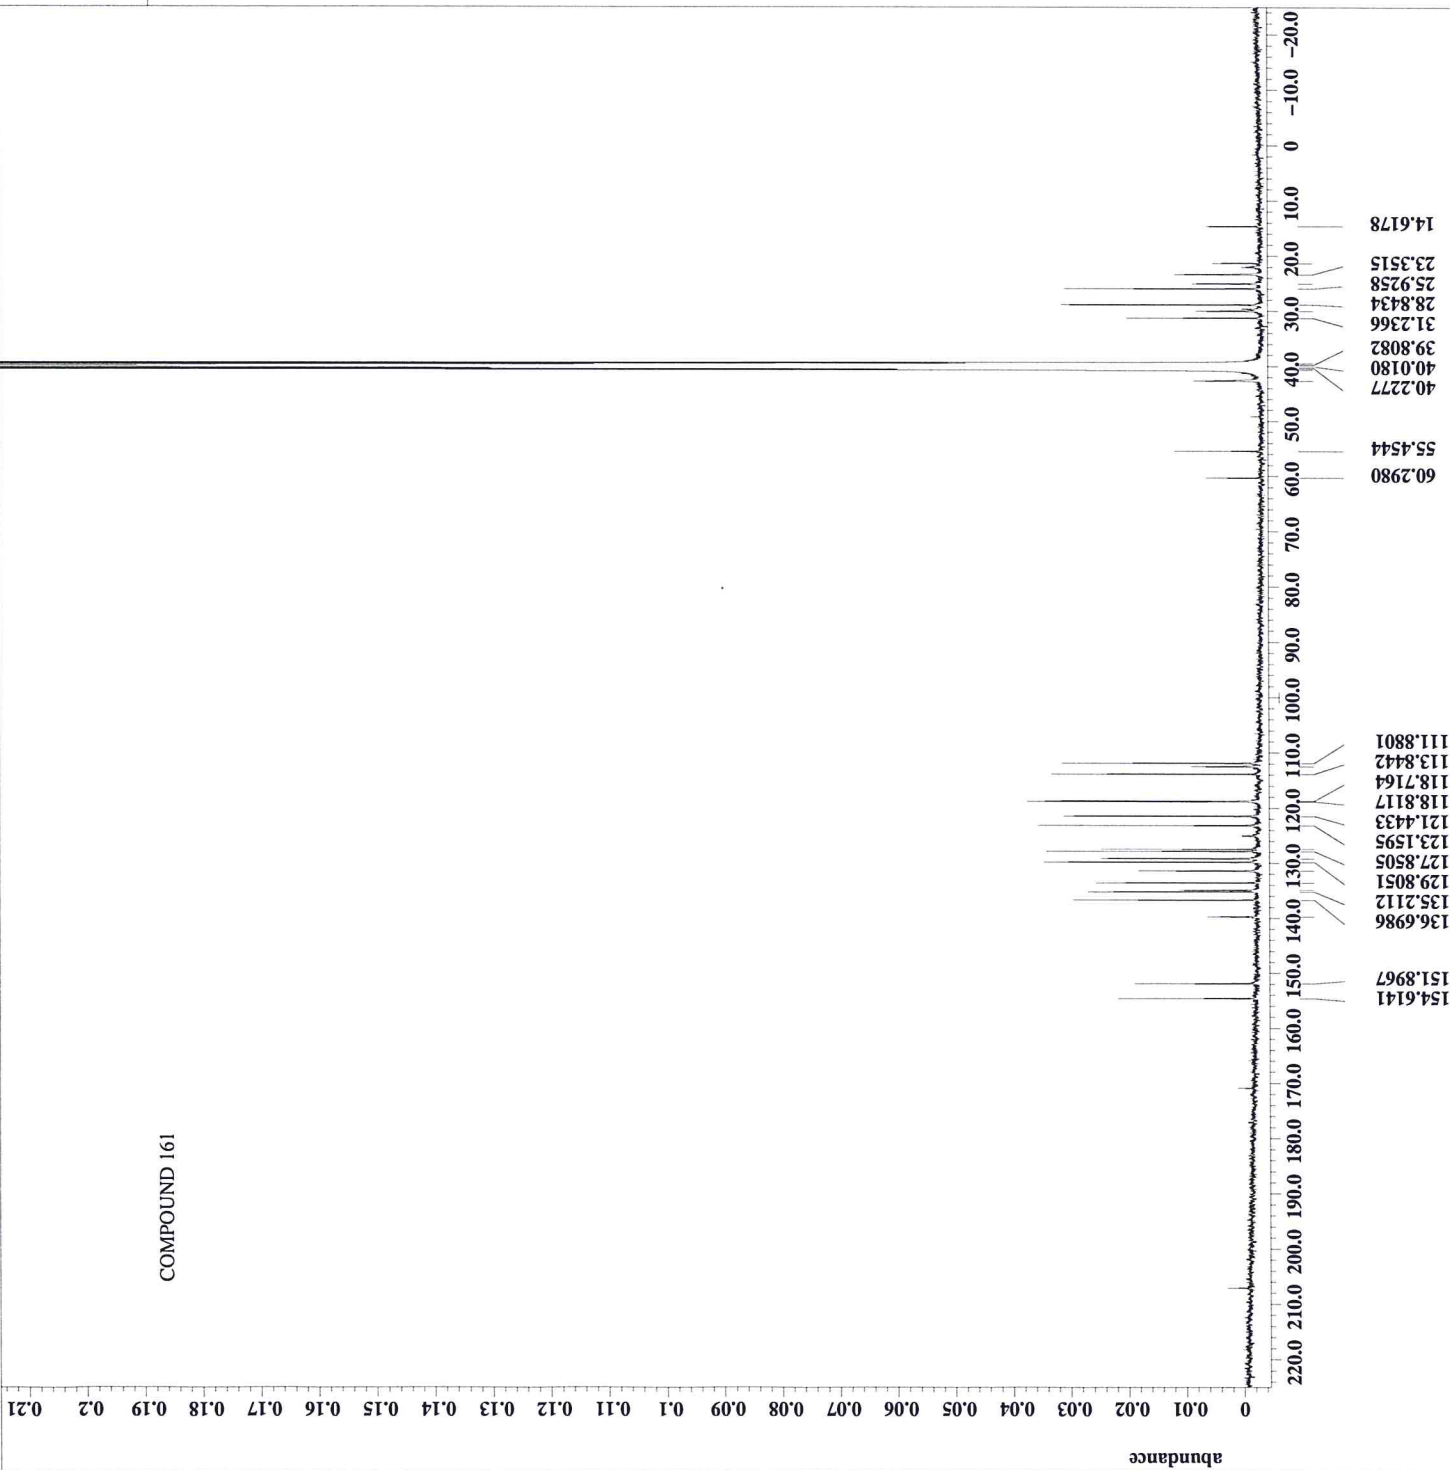

X : parts per Million : 13C

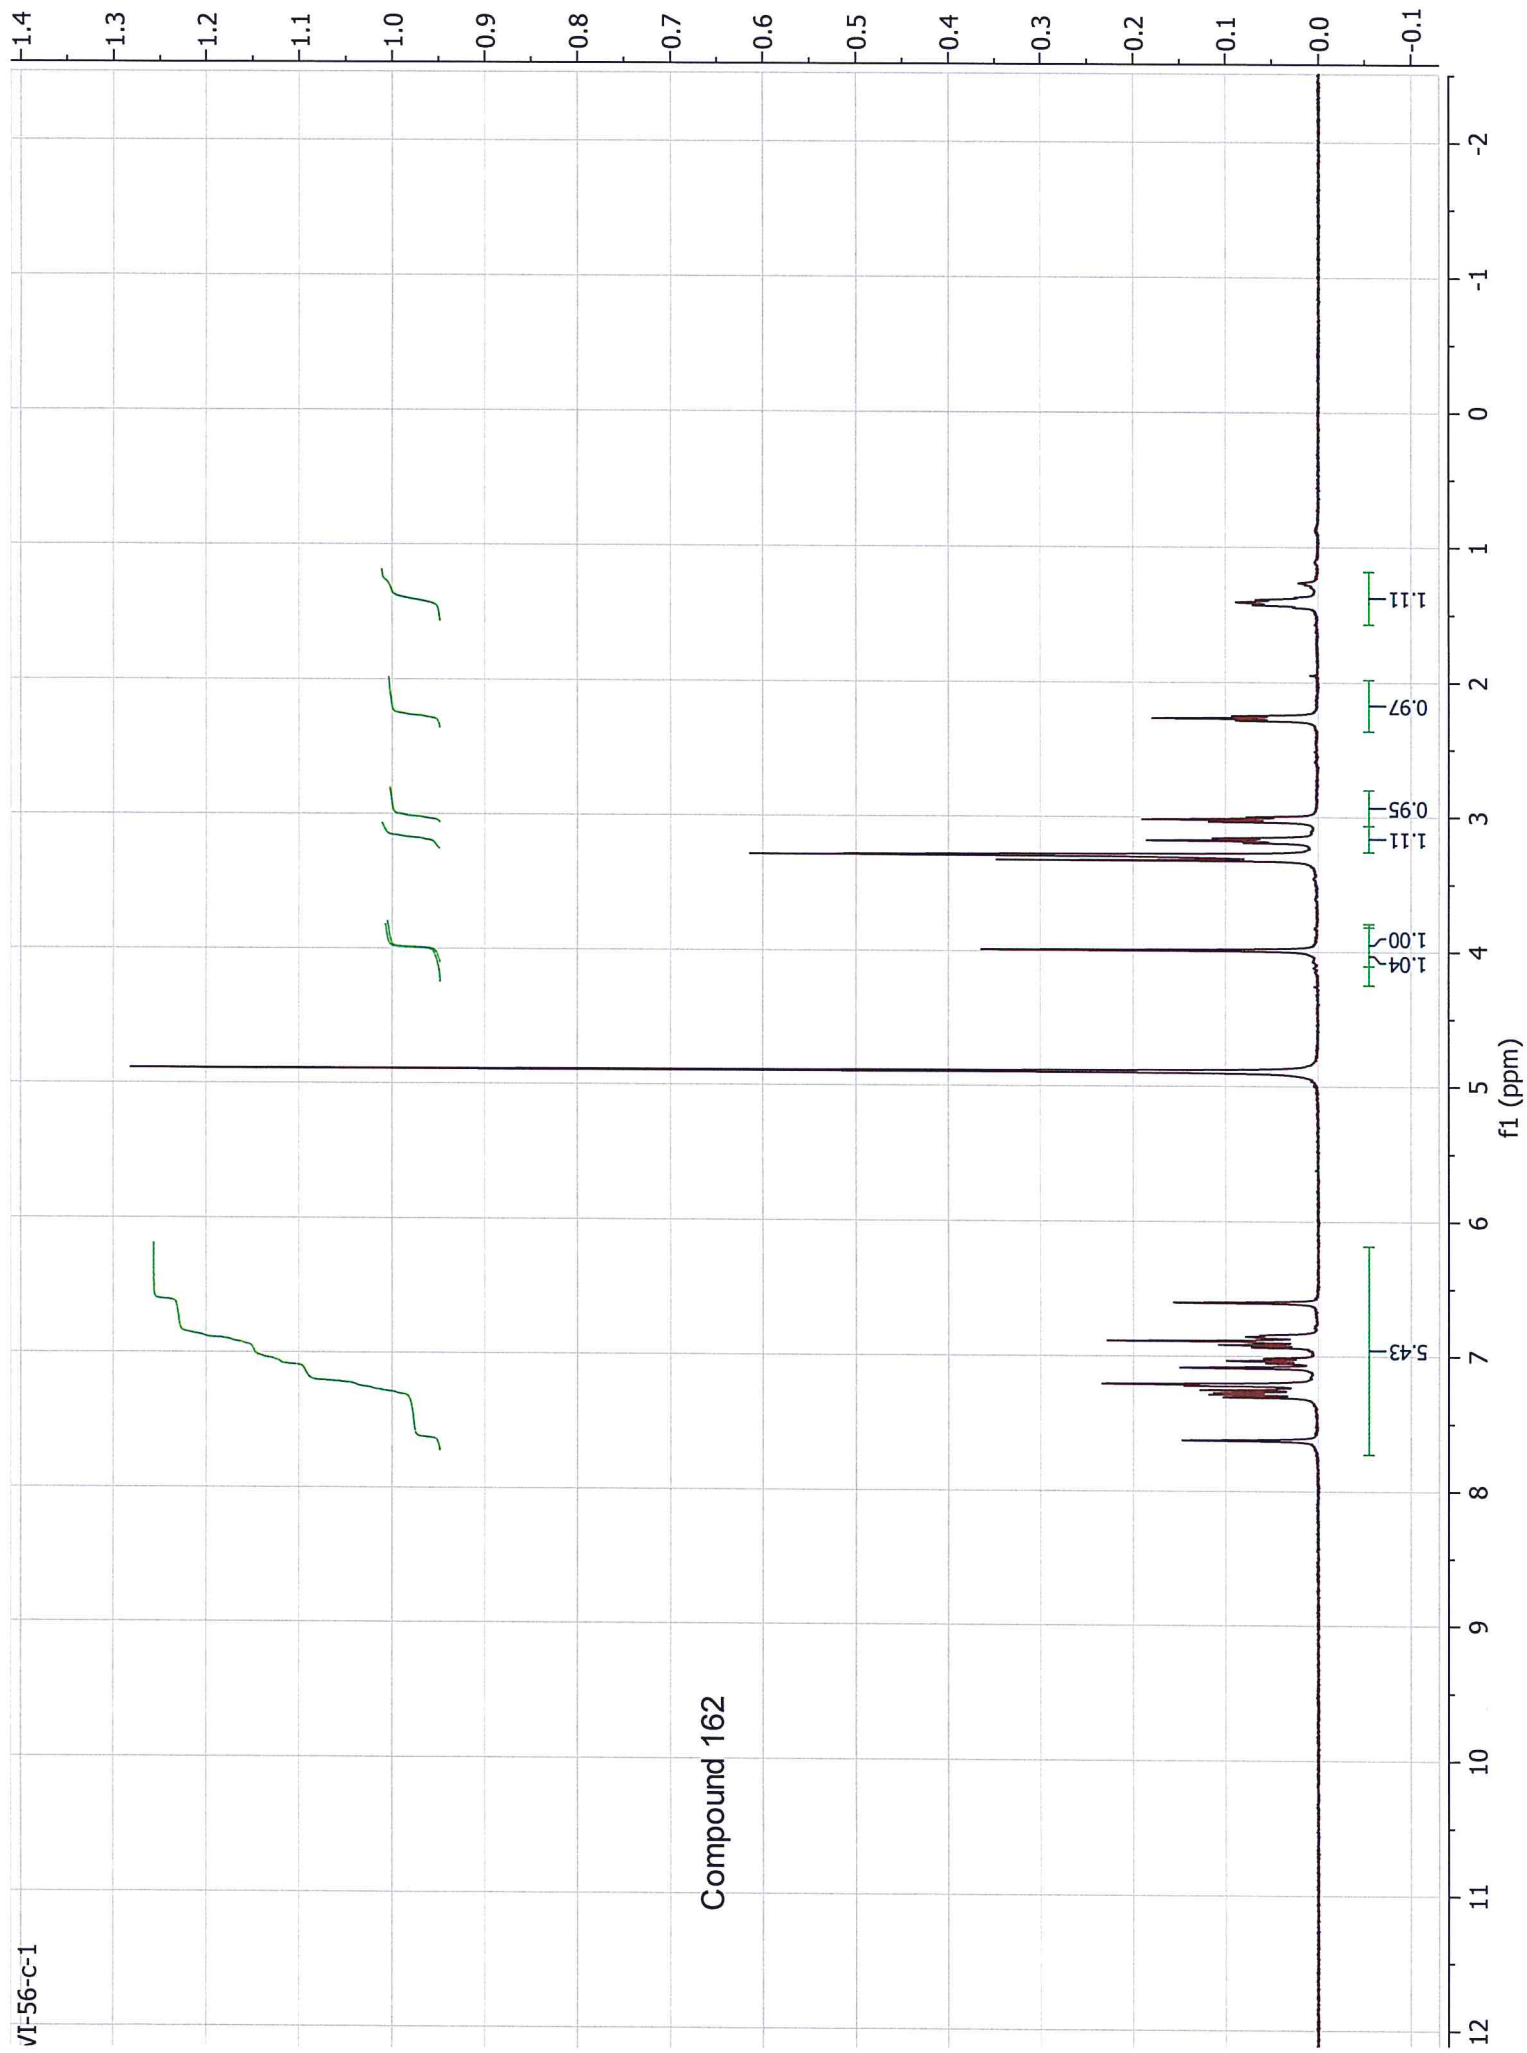



Compound 162

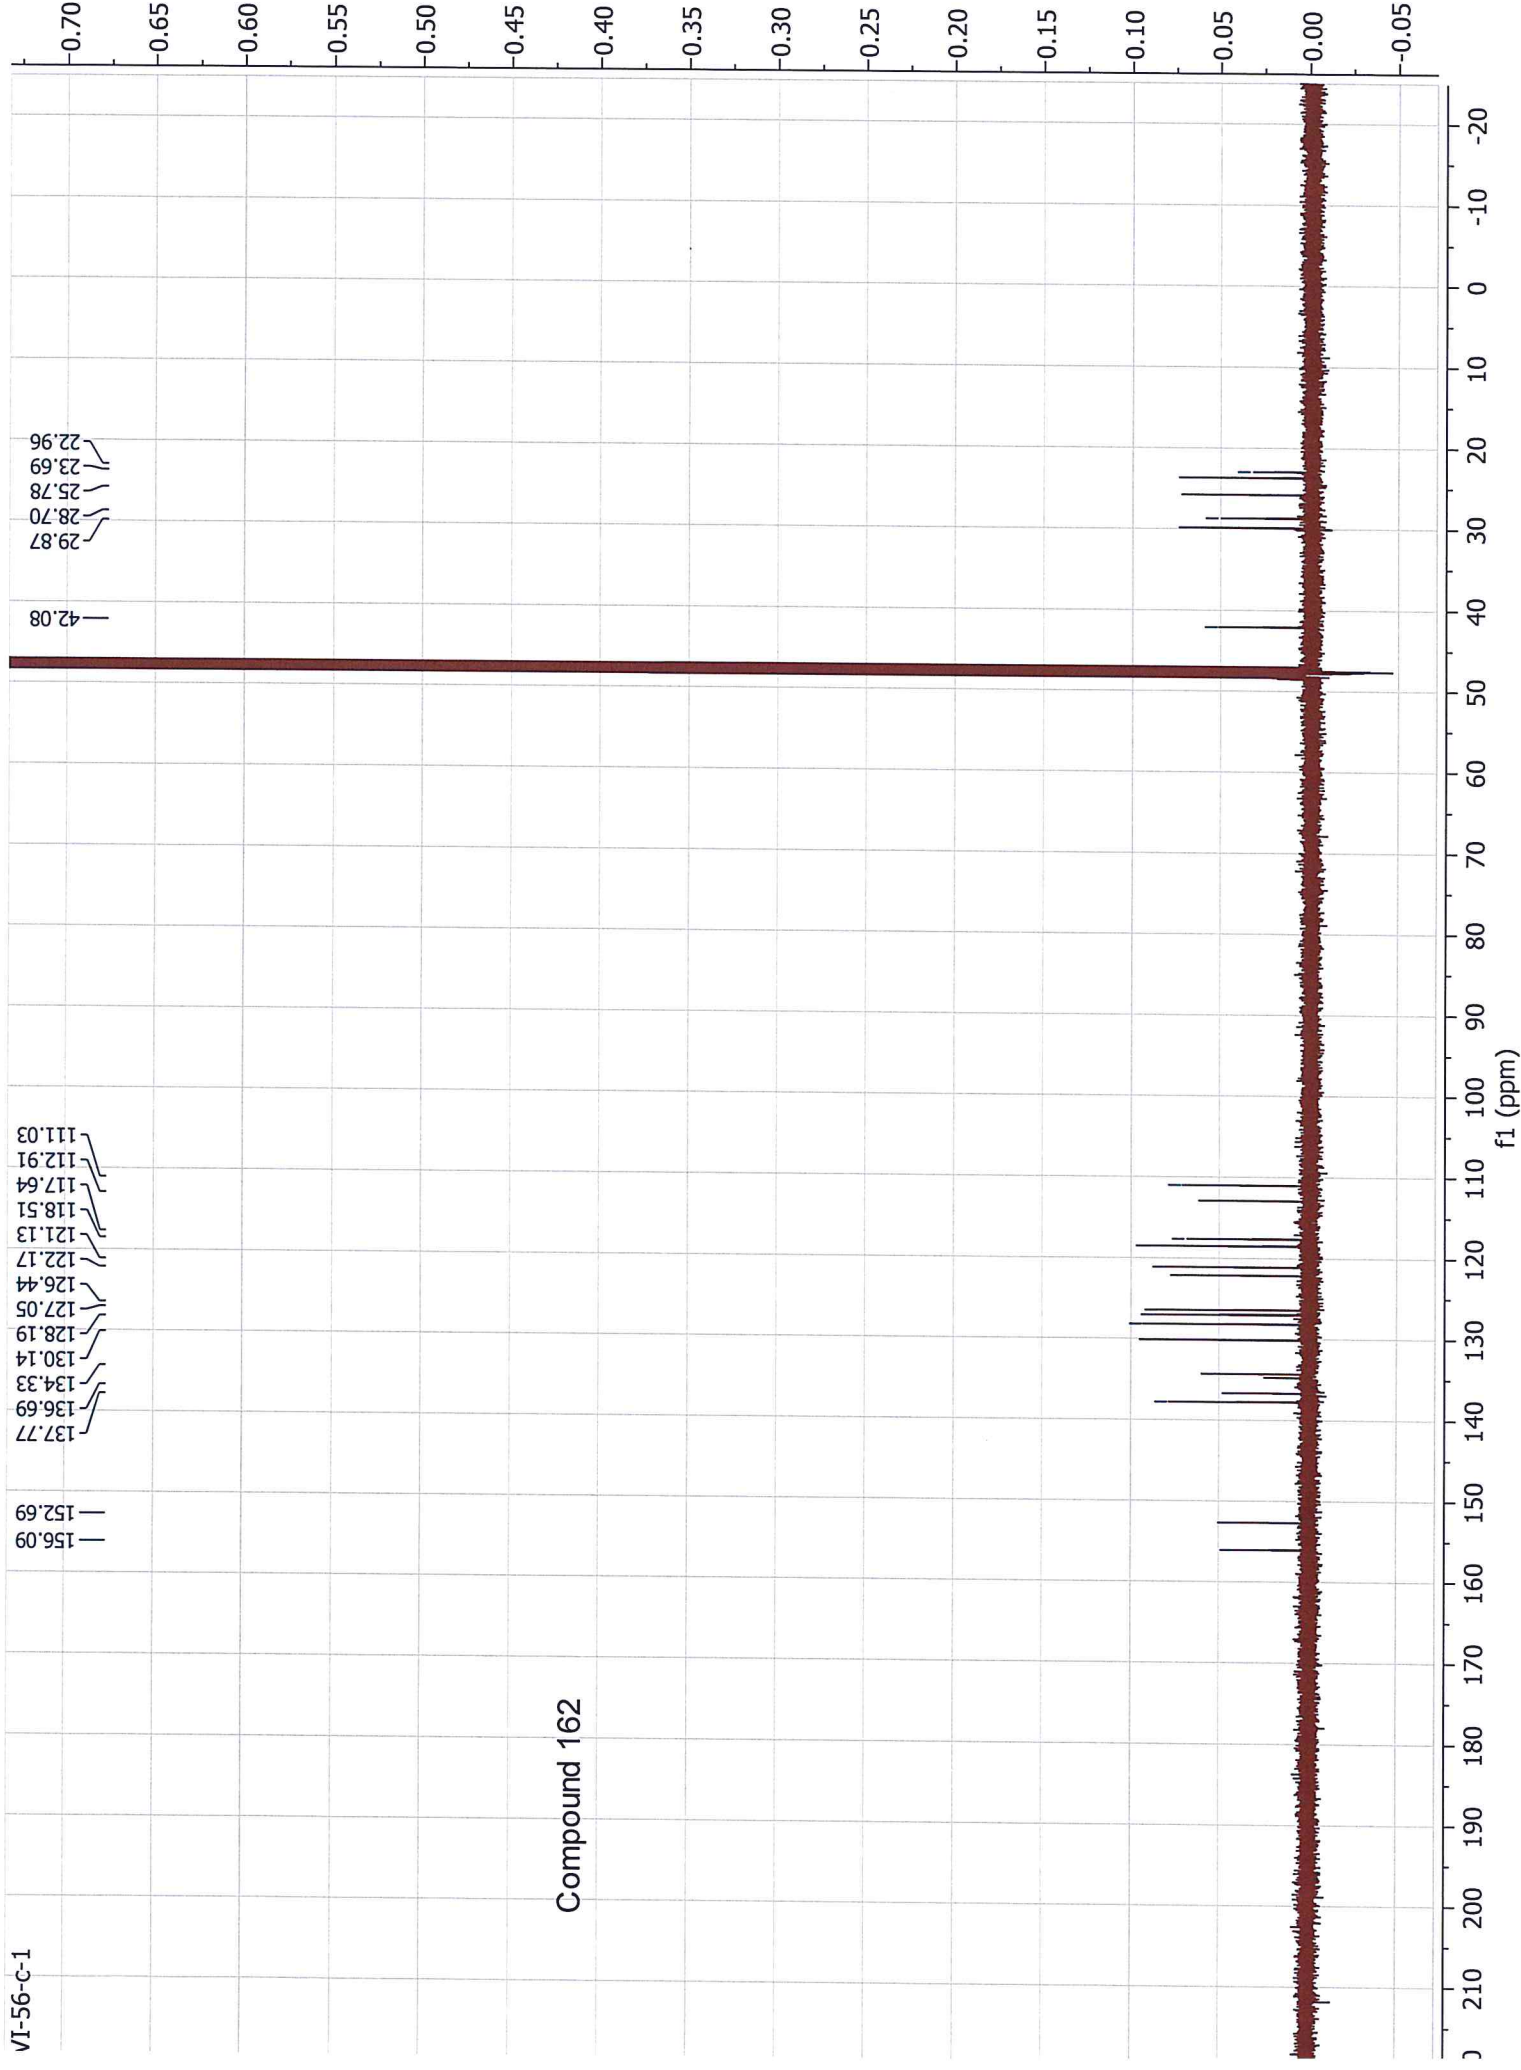

Compound 163

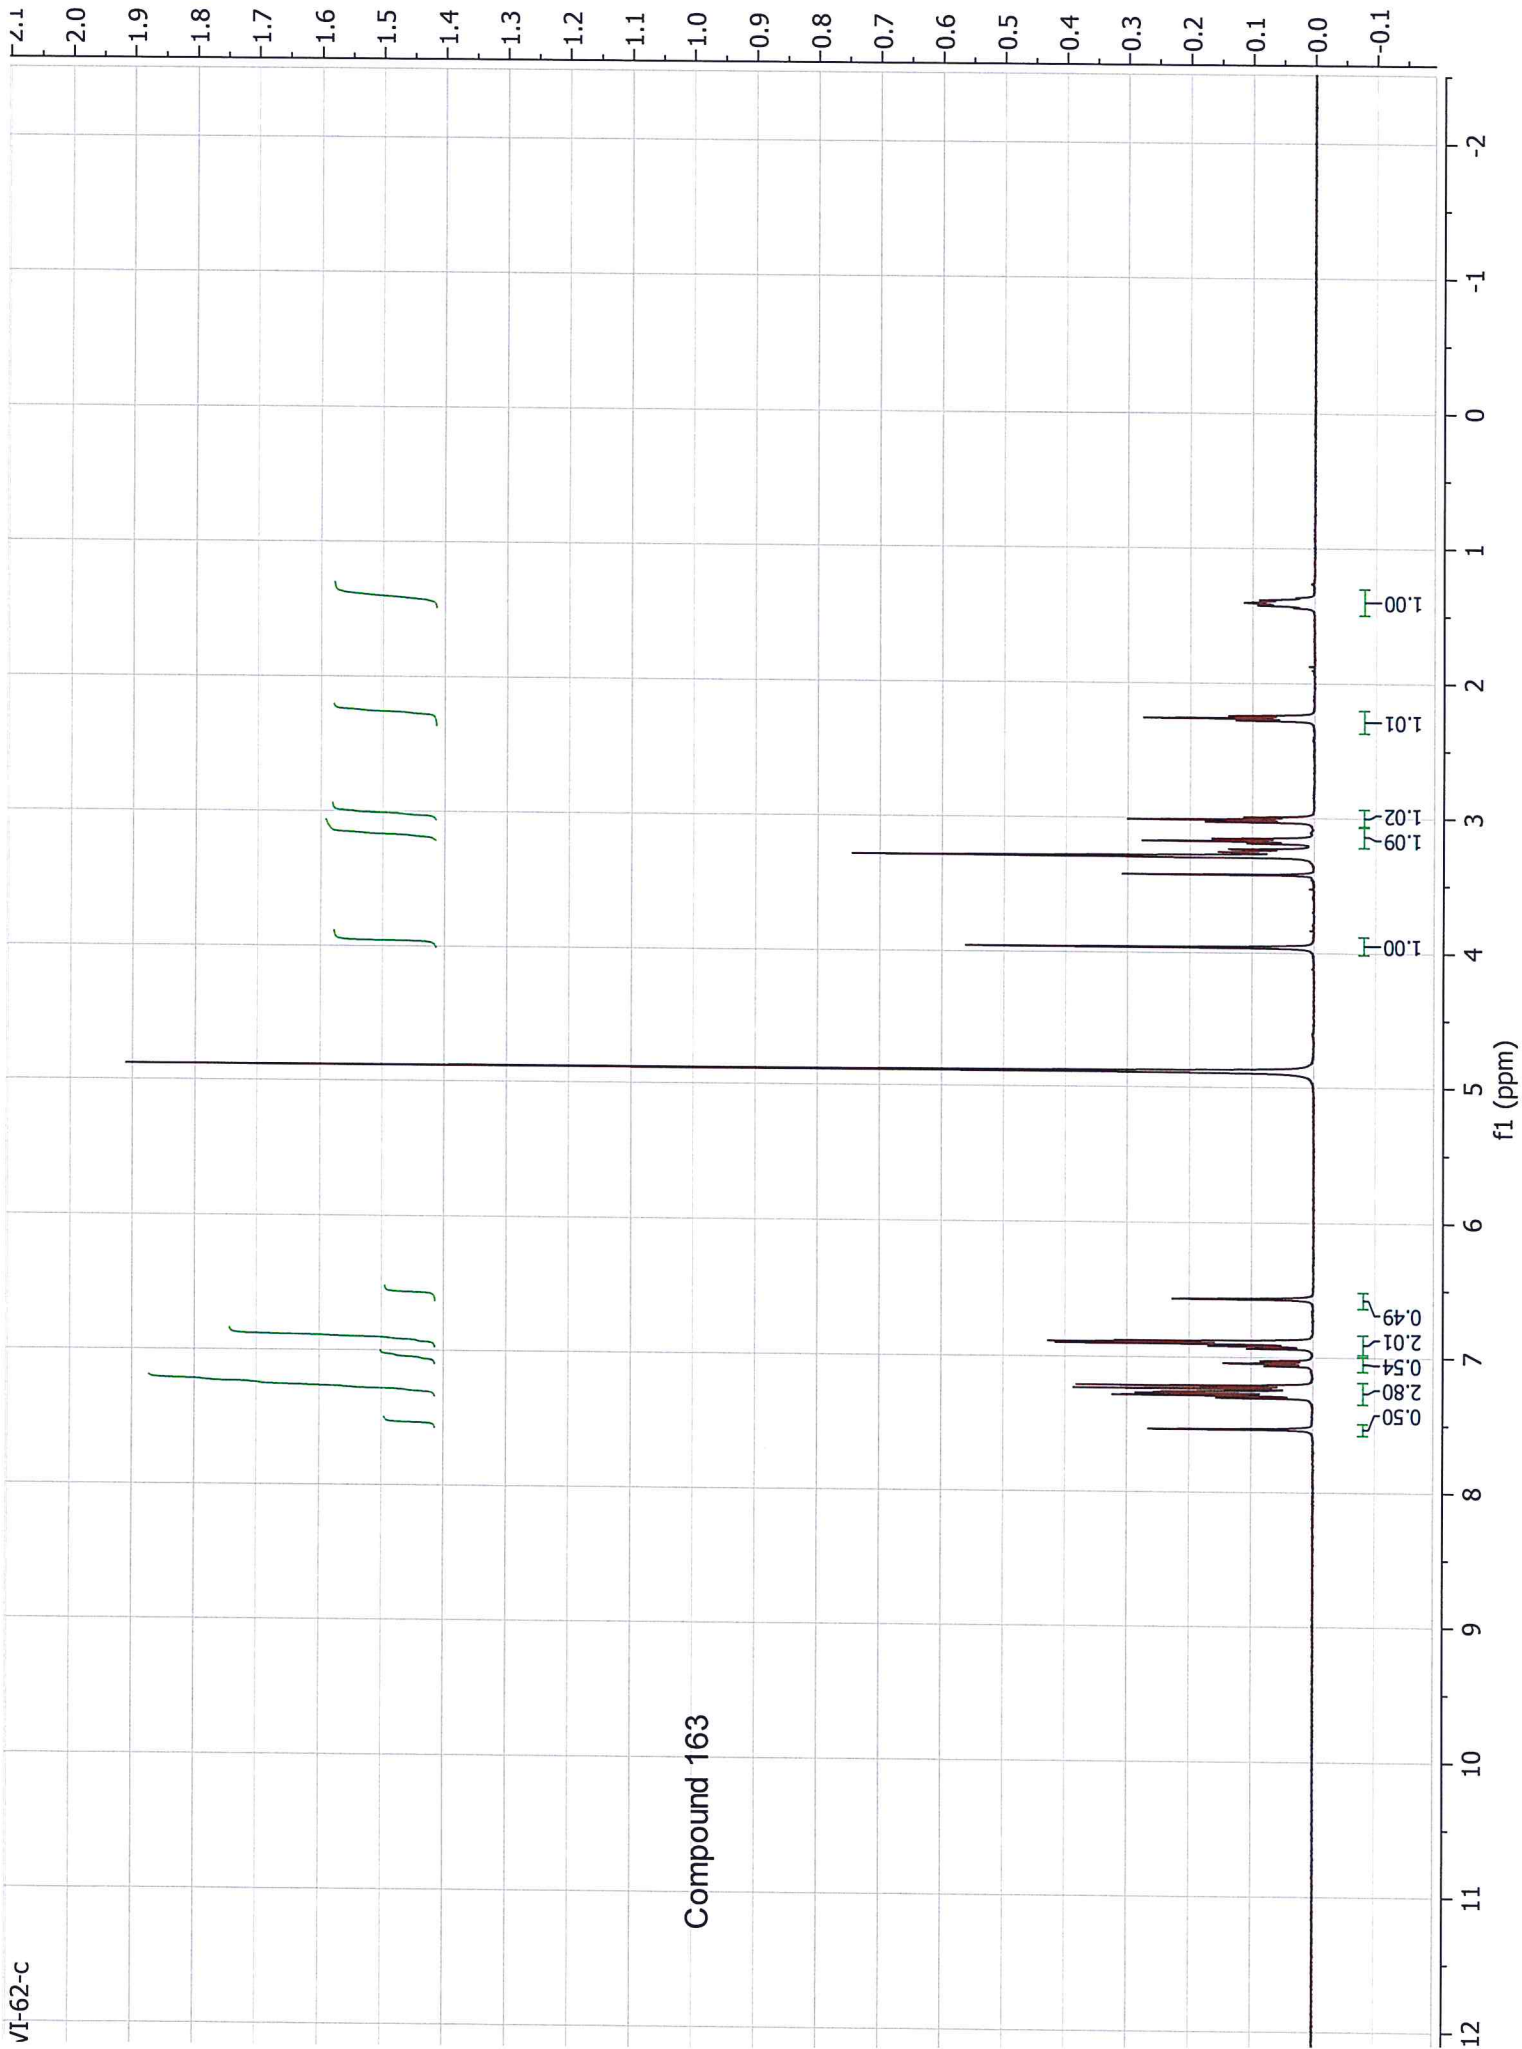

Compound 163

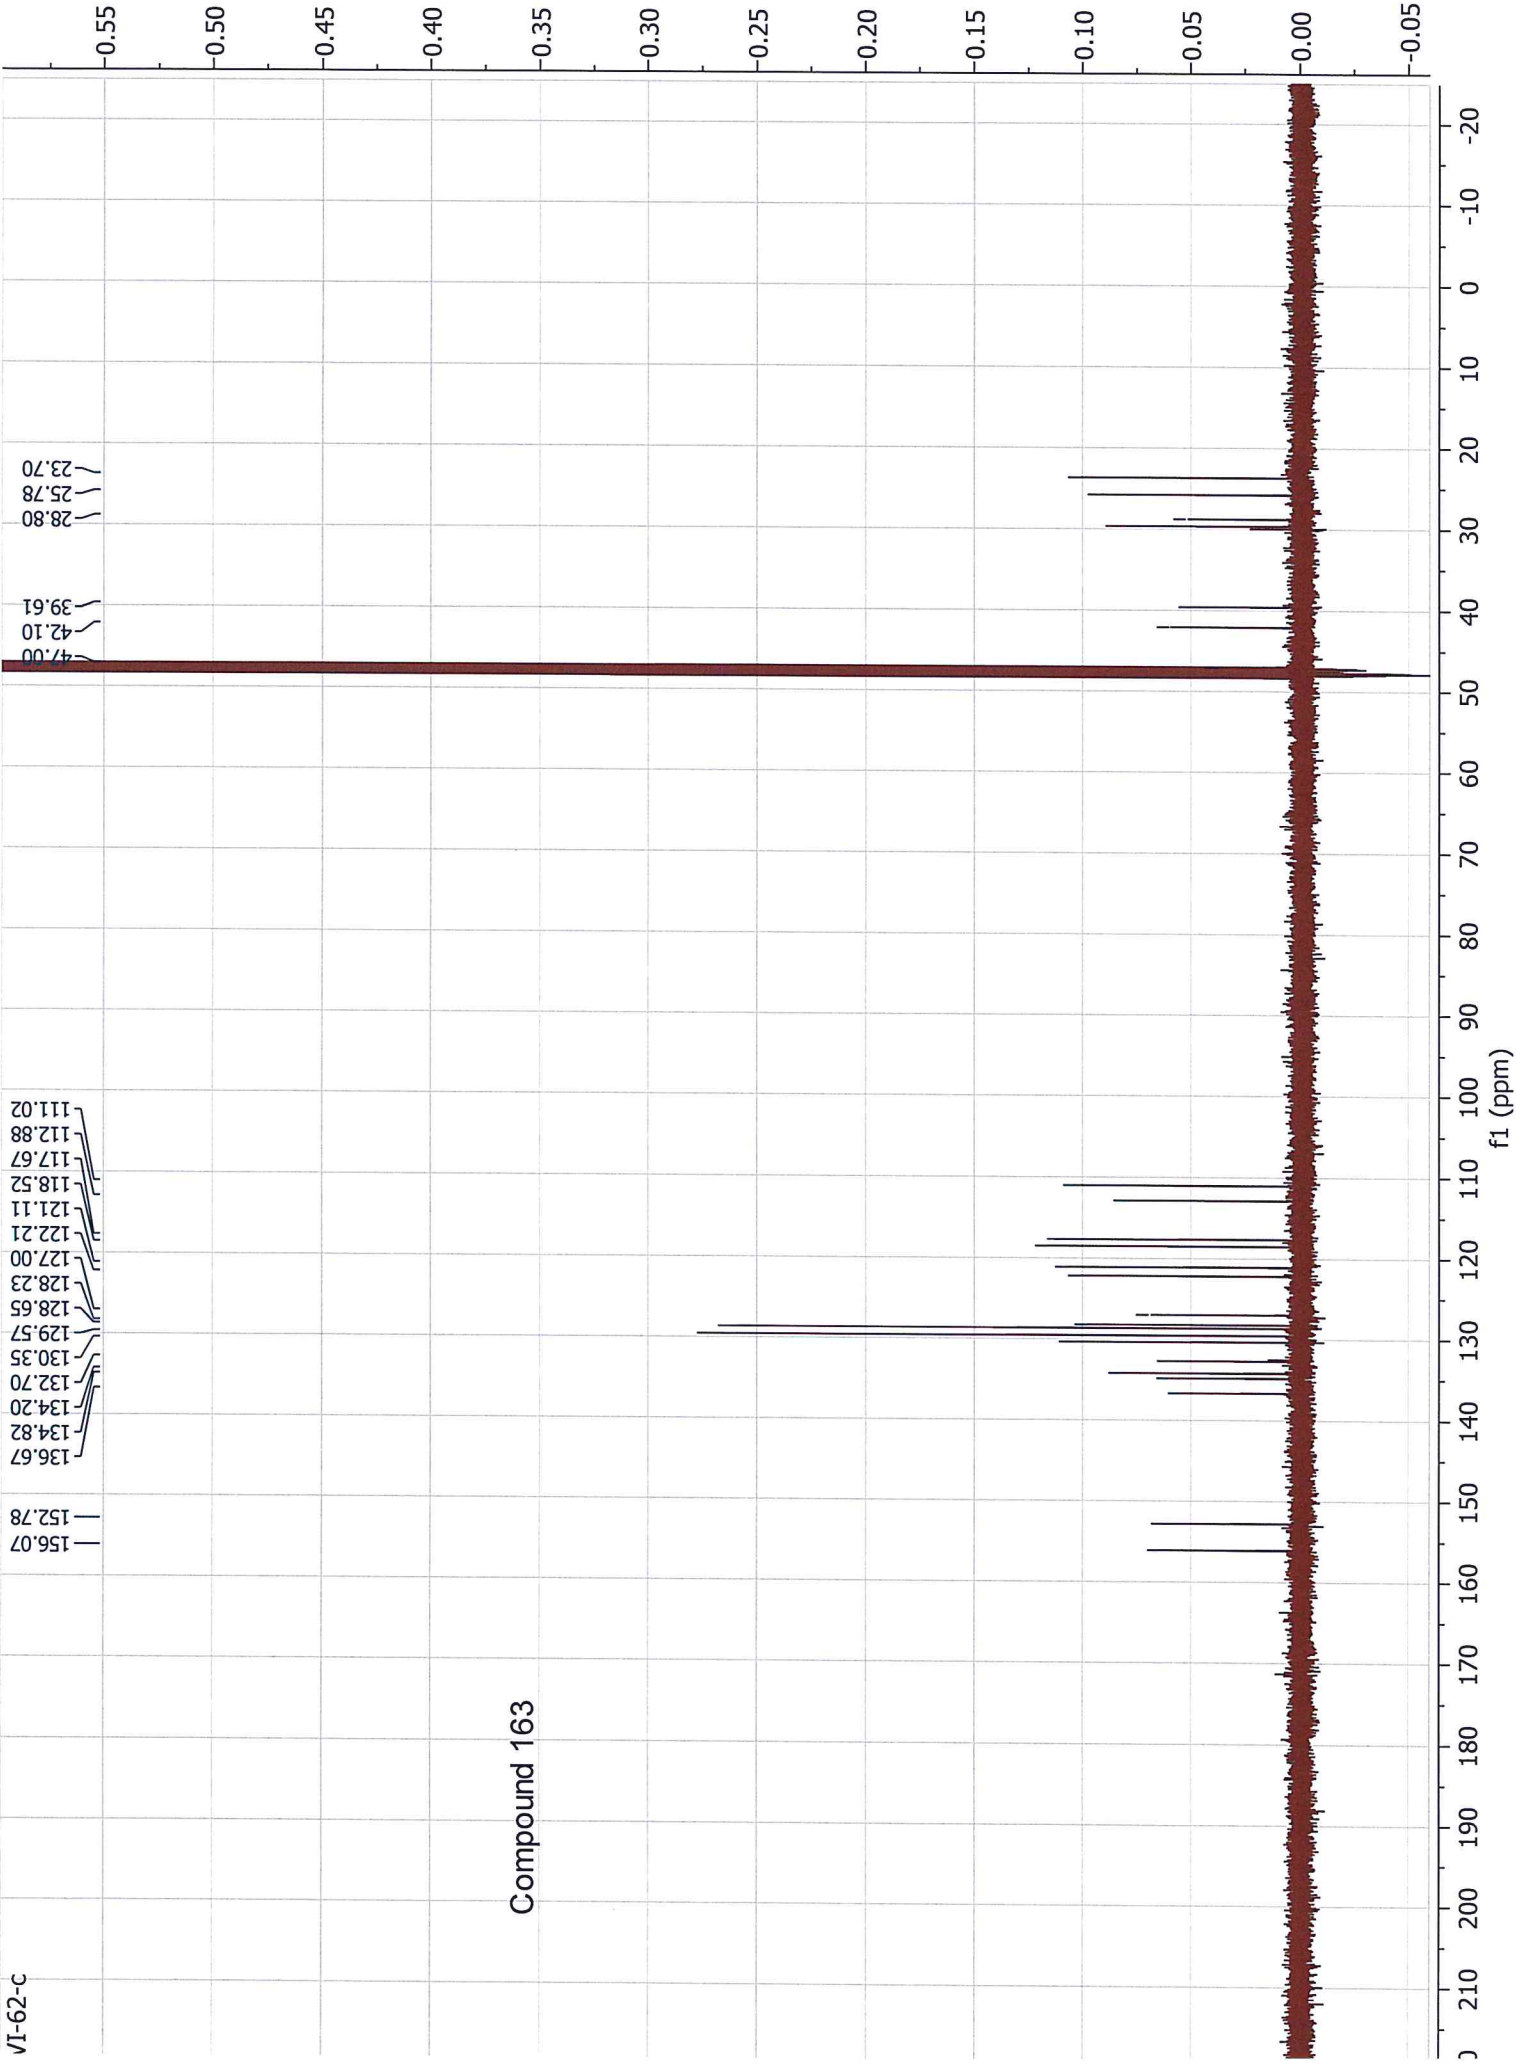

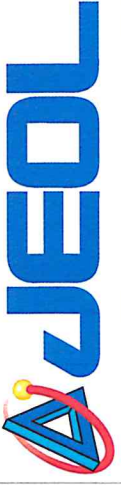

File name = SM-I-60-c-4\_PROTON-5.  
Author = Delta  
Experiment = single\_pulse.ex2  
Sample\_id = SM-I-60-c-4  
Solvent = DMSO-D6  
Creation\_time = 16-MAY-2016 16:41:50  
Revision\_time = 11-MAR-2021 09:43:03  
Current\_time = 11-MAR-2021 09:43:07

Data\_format = 1D COMPLEX  
Dim\_size = 13107  
Dim\_title = 1H  
Dim\_units = [ppm]  
Dimensions = X  
Site = ECS 400  
Spectrometer = JNM-ECS400

Field\_strength = 9.389766[T] (400 [MHz])  
X\_acq\_duration = 2.18365952[s]  
X\_domain = 1H  
X\_freq = 399.78219838 [MHz]  
X\_offset = 5 [ppm]  
X\_points = 16384  
X\_prescans = 1  
X\_resolution = 0.45794685 [Hz]  
X\_sweep = 7.5030012 [kHz]  
Irr\_domain = 1H  
Irr\_freq = 399.78219838 [MHz]  
Irr\_offset = 5 [ppm]  
Tri\_domain = 1H  
Tri\_freq = 399.78219838 [MHz]  
Tri\_offset = 5 [ppm]  
Clipped = FALSE  
Mod\_return = 1  
Scans = 16  
Total\_scans = 16

X\_90\_width = 10.68 [us]  
X\_acq\_time = 2.18365952 [s]  
X\_angle = 45 [deg]  
X\_atn = 6 [dB]  
X\_pulse = 5.34 [us]  
Irr\_mode = Off  
Tri\_mode = Off  
Dante\_presat = FALSE  
Initial\_wait = 1 [s]  
Recvr\_gain = 40  
Relaxation\_delay = 4 [s]  
Repetition\_time = 6.18365952 [s]  
Temp\_get = 20.6 [dC]

COMPOUND 164

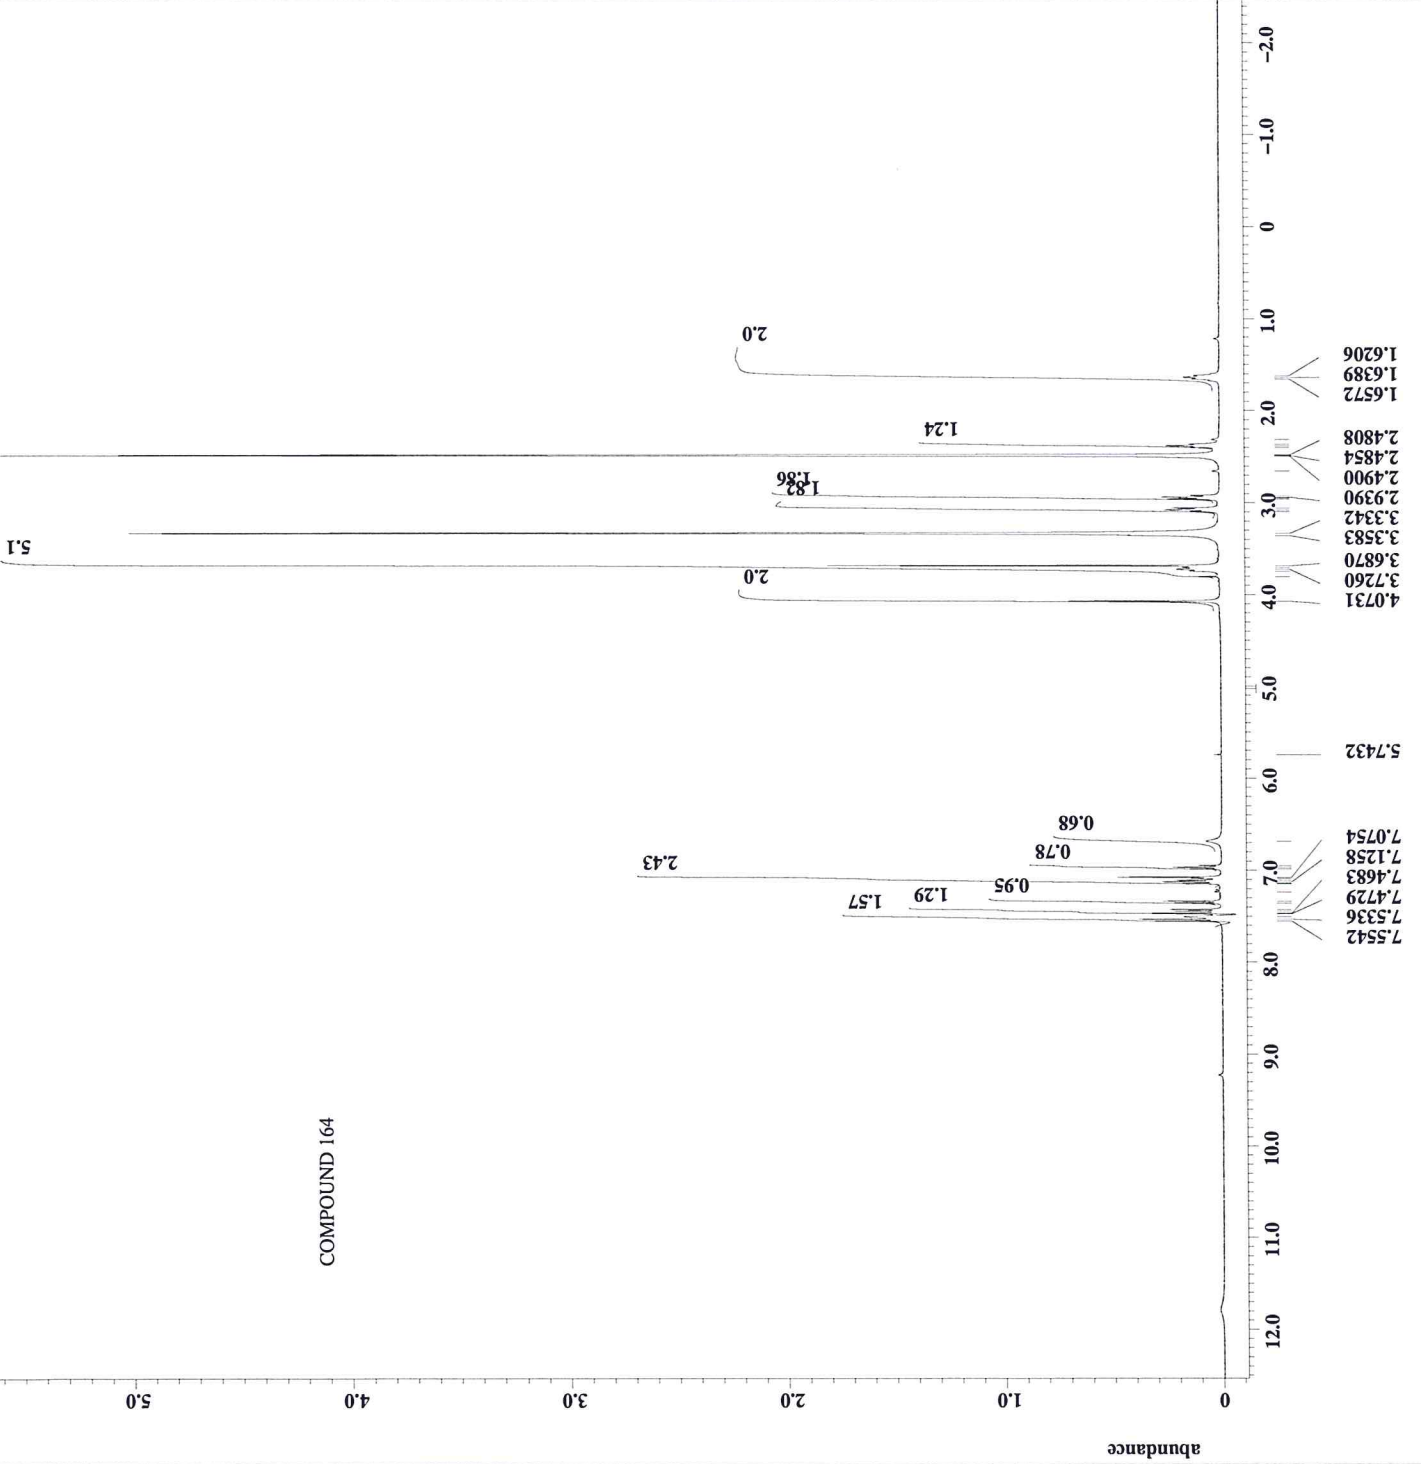

X : parts per Million : 1H



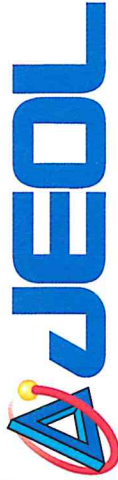

File name = SM-I-60-c-4\_CARBON-5.  
Author = Delta  
Experiment = single\_pulse\_dec  
Sample\_id = SM-I-60-c-4  
Solvent = DMSO-D6  
Creation\_time = 17-MAY-2016 04:15:17  
Revision\_time = 11-MAR-2021 09:35:24  
Current\_time = 11-MAR-2021 09:35:28

Data\_format = 1D COMPLEX  
Dim\_size = 26214  
Dim\_title = 13C  
Dim\_units = [ppm]  
Dimensions = X  
Site = ECS 400  
Spectrometer = JNM-ECS400

Field\_strength = 9.389766[T] (400[MHz])  
X\_acq\_duration = 1.04333312[s]  
X\_domain = 13C  
X\_freq = 100.52530333[MHz]  
X\_offset = 32768  
X\_points = 4  
X\_prescans = 0.95846665[Hz]  
X\_resolution = 31.40703518[KHz]  
X\_sweep = 1H  
Irr\_domain = 399.78219838[MHz]  
Irr\_freq = 5[ppm]  
Irr\_offset = FALSE  
Clipped = 1  
Mod\_return = 10240  
Total\_scans = 10240

X\_90\_width = 12.84[us]  
X\_acq\_time = 1.04333312[s]  
X\_angle = 30[deg]  
X\_atn = 9[dB]  
X\_pulse = 4.28[us]  
Irr\_atn\_dec = 27[dB]  
Irr\_atn\_noe = 27[dB]  
Decoupling = WALTZ  
Initial\_wait = 1[s]  
Noe = TRUE  
Noe\_time = 3[s]  
Recvr\_gain = 60  
Relaxation\_delay = 3[s]  
Repetition\_time = 4.04333312[s]  
Temp\_get = 20[dc]

COMPOUND 164

0.24

0.22

0.2

0.18

0.16

0.14

0.12

0.1

0.08

0.06

0.04

0.02

0

abundance

220.0 210.0 200.0 190.0 180.0 170.0 160.0 150.0 140.0 130.0 120.0 110.0 100.0 90.0 80.0 70.0 60.0 50.0 40.0 30.0 20.0 10.0 0 -10.0 -20.0

40.1293  
39.9195  
39.7098  
39.5000  
39.2902  
38.8707  
32.2251

151.8554  
154.1533  
137.9159  
130.6410  
130.6029  
129.0583  
127.2276  
126.9797  
121.0683  
118.3891  
112.7351  
109.5410

X : parts per Million : 13C

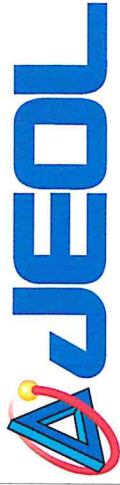

Filename = BN-VI-89-c\_PROTON-3.j  
Author = Neumann  
Experiment = single\_pulse.ex2  
Sample\_id = BN-VI-89-c  
Solvent = DMSO-D6  
Creation\_time = 3-FEB-2016 13:01:18  
Revision\_time = 10-MAR-2021 11:22:25  
Current\_time = 10-MAR-2021 11:22:30  
Data\_format = 1D COMPLEX  
Dim\_size = 13107  
Dim\_title = 1H  
Dim\_units = [ppm]  
Dimensions = X  
Site = ECS 400  
Spectrometer = JNM-ECS400  
Field\_strength = 9.389766[T] (400[MHz])  
X\_acq\_duration = 2.18365952[s]  
X\_domain = 1H  
X\_freq = 399.78219838[MHz]  
X\_offset = 5[ppm]  
X\_points = 16384  
X\_prescans = 1  
X\_resolution = 0.45794685[Hz]  
X\_sweep = 7.5030012[kHz]  
Irr\_domain = 1H  
Irr\_freq = 399.78219838[MHz]  
Irr\_offset = 5[ppm]  
Tri\_domain = 1H  
Tri\_freq = 399.78219838[MHz]  
Tri\_offset = 5[ppm]  
Clipped = FALSE  
Mod\_return = 1  
Scans = 16  
Total\_scans = 16  
X\_90\_width = 10.58[us]  
X\_acq\_time = 2.18365952[s]  
X\_angle = 45[deg]  
X\_atn = 6[dB]  
X\_pulse = 5.29[us]  
Irr\_mode = Off  
Tri\_mode = Off  
Dante\_presat = FALSE  
Initial\_wait = 1[fs]  
Recvr\_gain = 42  
Relaxation\_delay = 4[fs]  
Repetition\_time = 6.18365952[s]  
Temp\_get = 30[degC]

7.04

COMPOUND 165

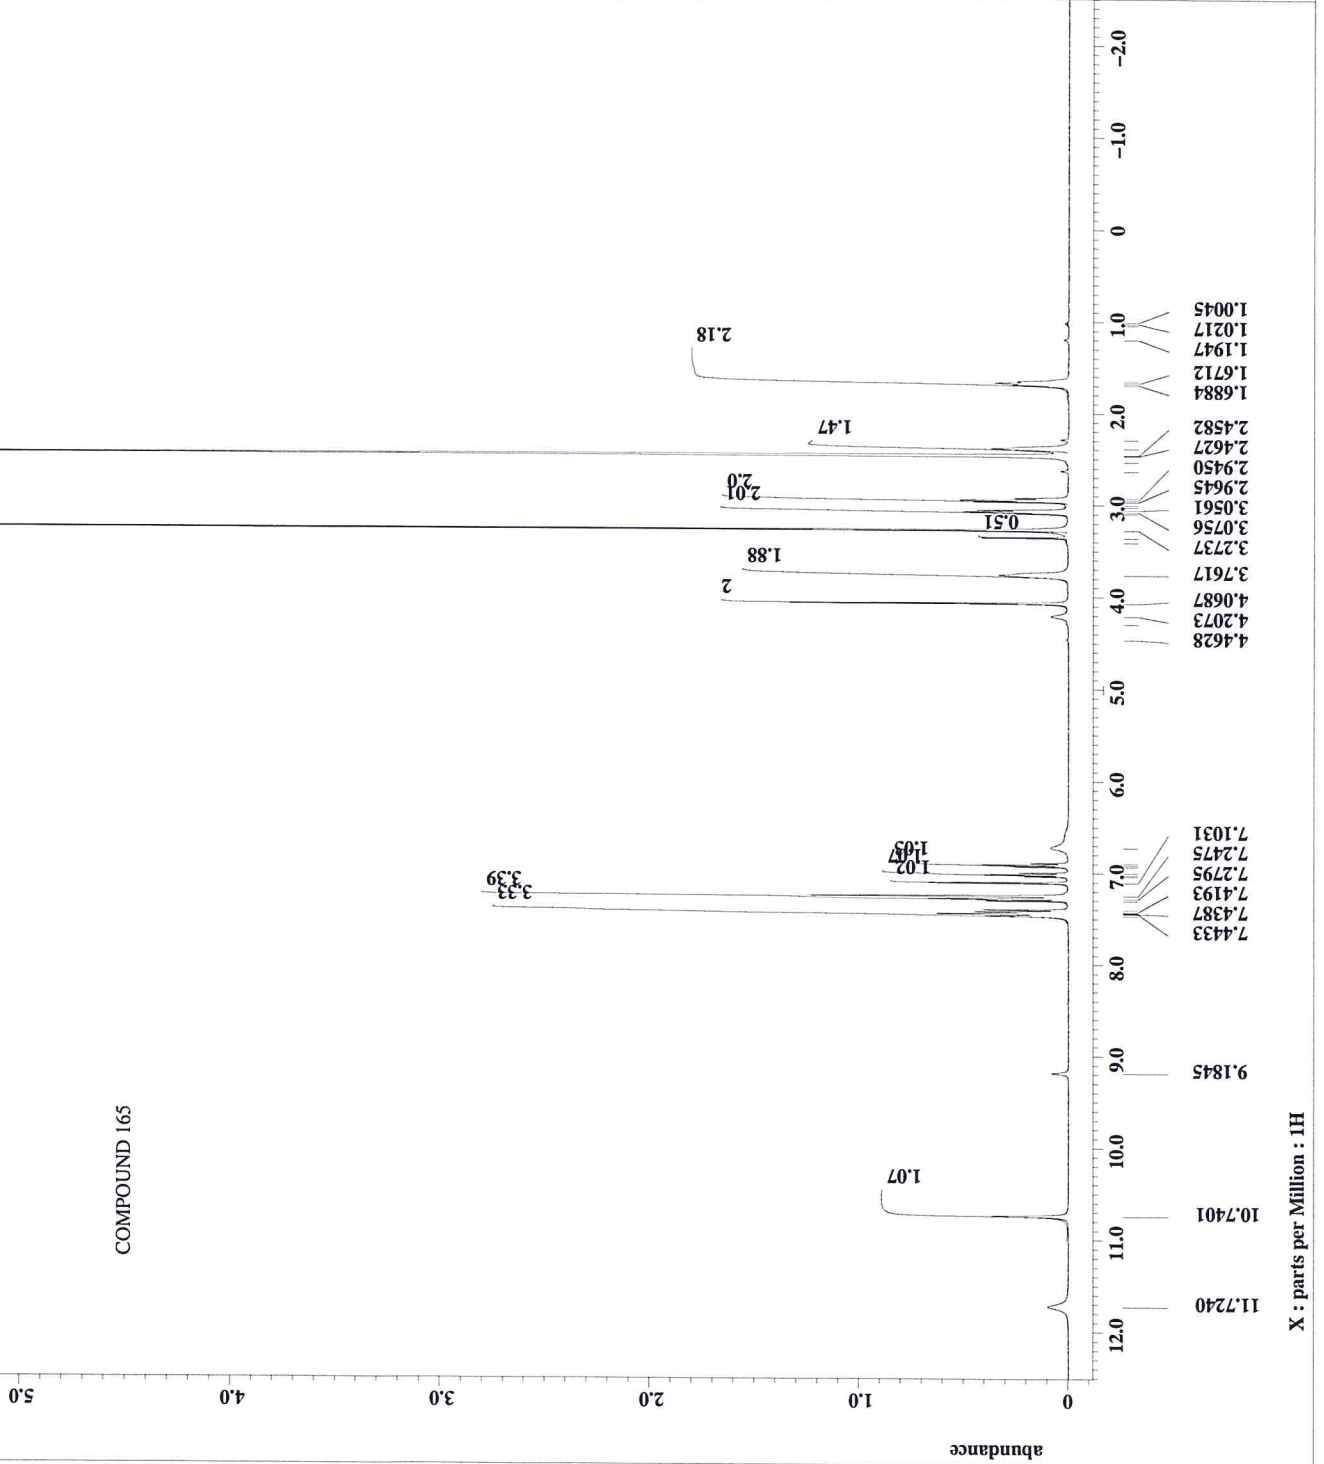

X : parts per Million : 1H

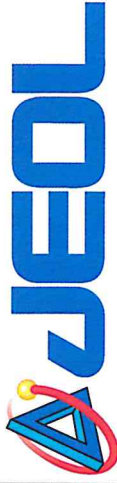

```

Filename = BN-VI-89-c_CARBON-4.j
Author = Neumann
Experiment = single_pulse_dec
Sample_id = BN-VI-89-c
Solvent = DMSO-D6
Creation_time = 3-FER-2016 14:16:46
Revision_time = 10-MAR-2021 11:34:08
Current_time = 10-MAR-2021 11:34:30

Data_format = 1D COMPLEX
Dim_size = 26214
Dim_title = 13C
Dim_units = [ppm]
Dimensions = X
Site = ECS 400
Spectrometer = JNM-ECS400

Field_strength = 9.389766[T] (400 [MHz])
X_acq_duration = 1.04333312[s]
X_domain = 13C
X_freq = 100.52530333 [MHz]
X_offset = 100 [ppm]
X_points = 32768
X_prescans = 4
X_resolution = 0.95846665 [Hz]
X_sweep = 31.40703518 [kHz]
Irr_domain = 1H
Irr_freq = 399.78219838 [MHz]
Irr_offset = 5 [ppm]
Clipped = FALSE
Mod_return = 1
Scans = 1452
Total_scans = 1452

X_90_width = 13.12 [us]
X_acq_time = 1.04333312 [s]
X_angle = 30 [deg]
X_atn = 9 [dB]
X_pulse = 4.37333333 [us]
Irr_atn_dec = 27 [dB]
Irr_atn_noe = 27 [dB]
Irr_noise = WALTZ
Decoupling = TRUE
Initial_wait = 1 [s]
Noe = TRUE
Noe_time = 2 [s]
Recvr_gain = 60
Relaxation_delay = 2 [s]
Repetition_time = 3.04333312 [s]
Temp_get = 30 [DC]

```

COMPOUND 165

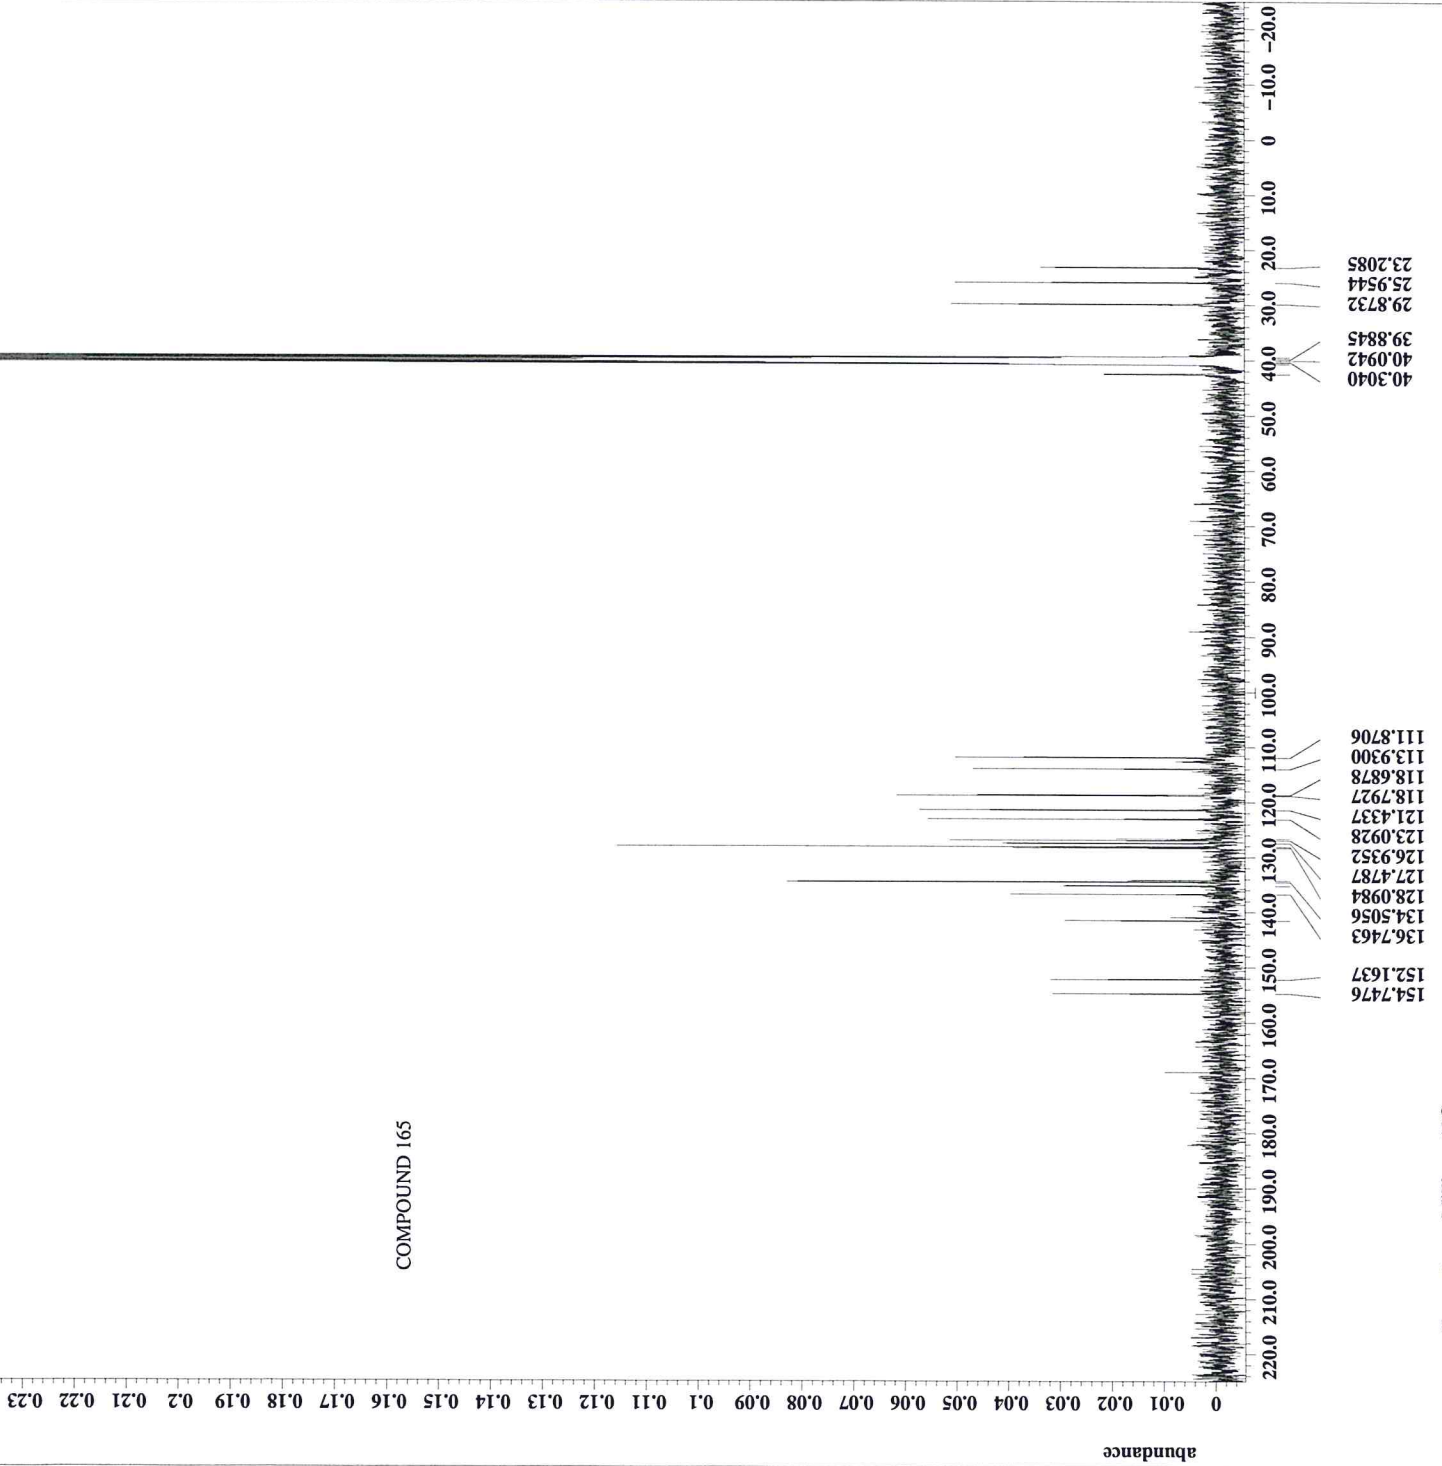

X : parts per Million : 13C

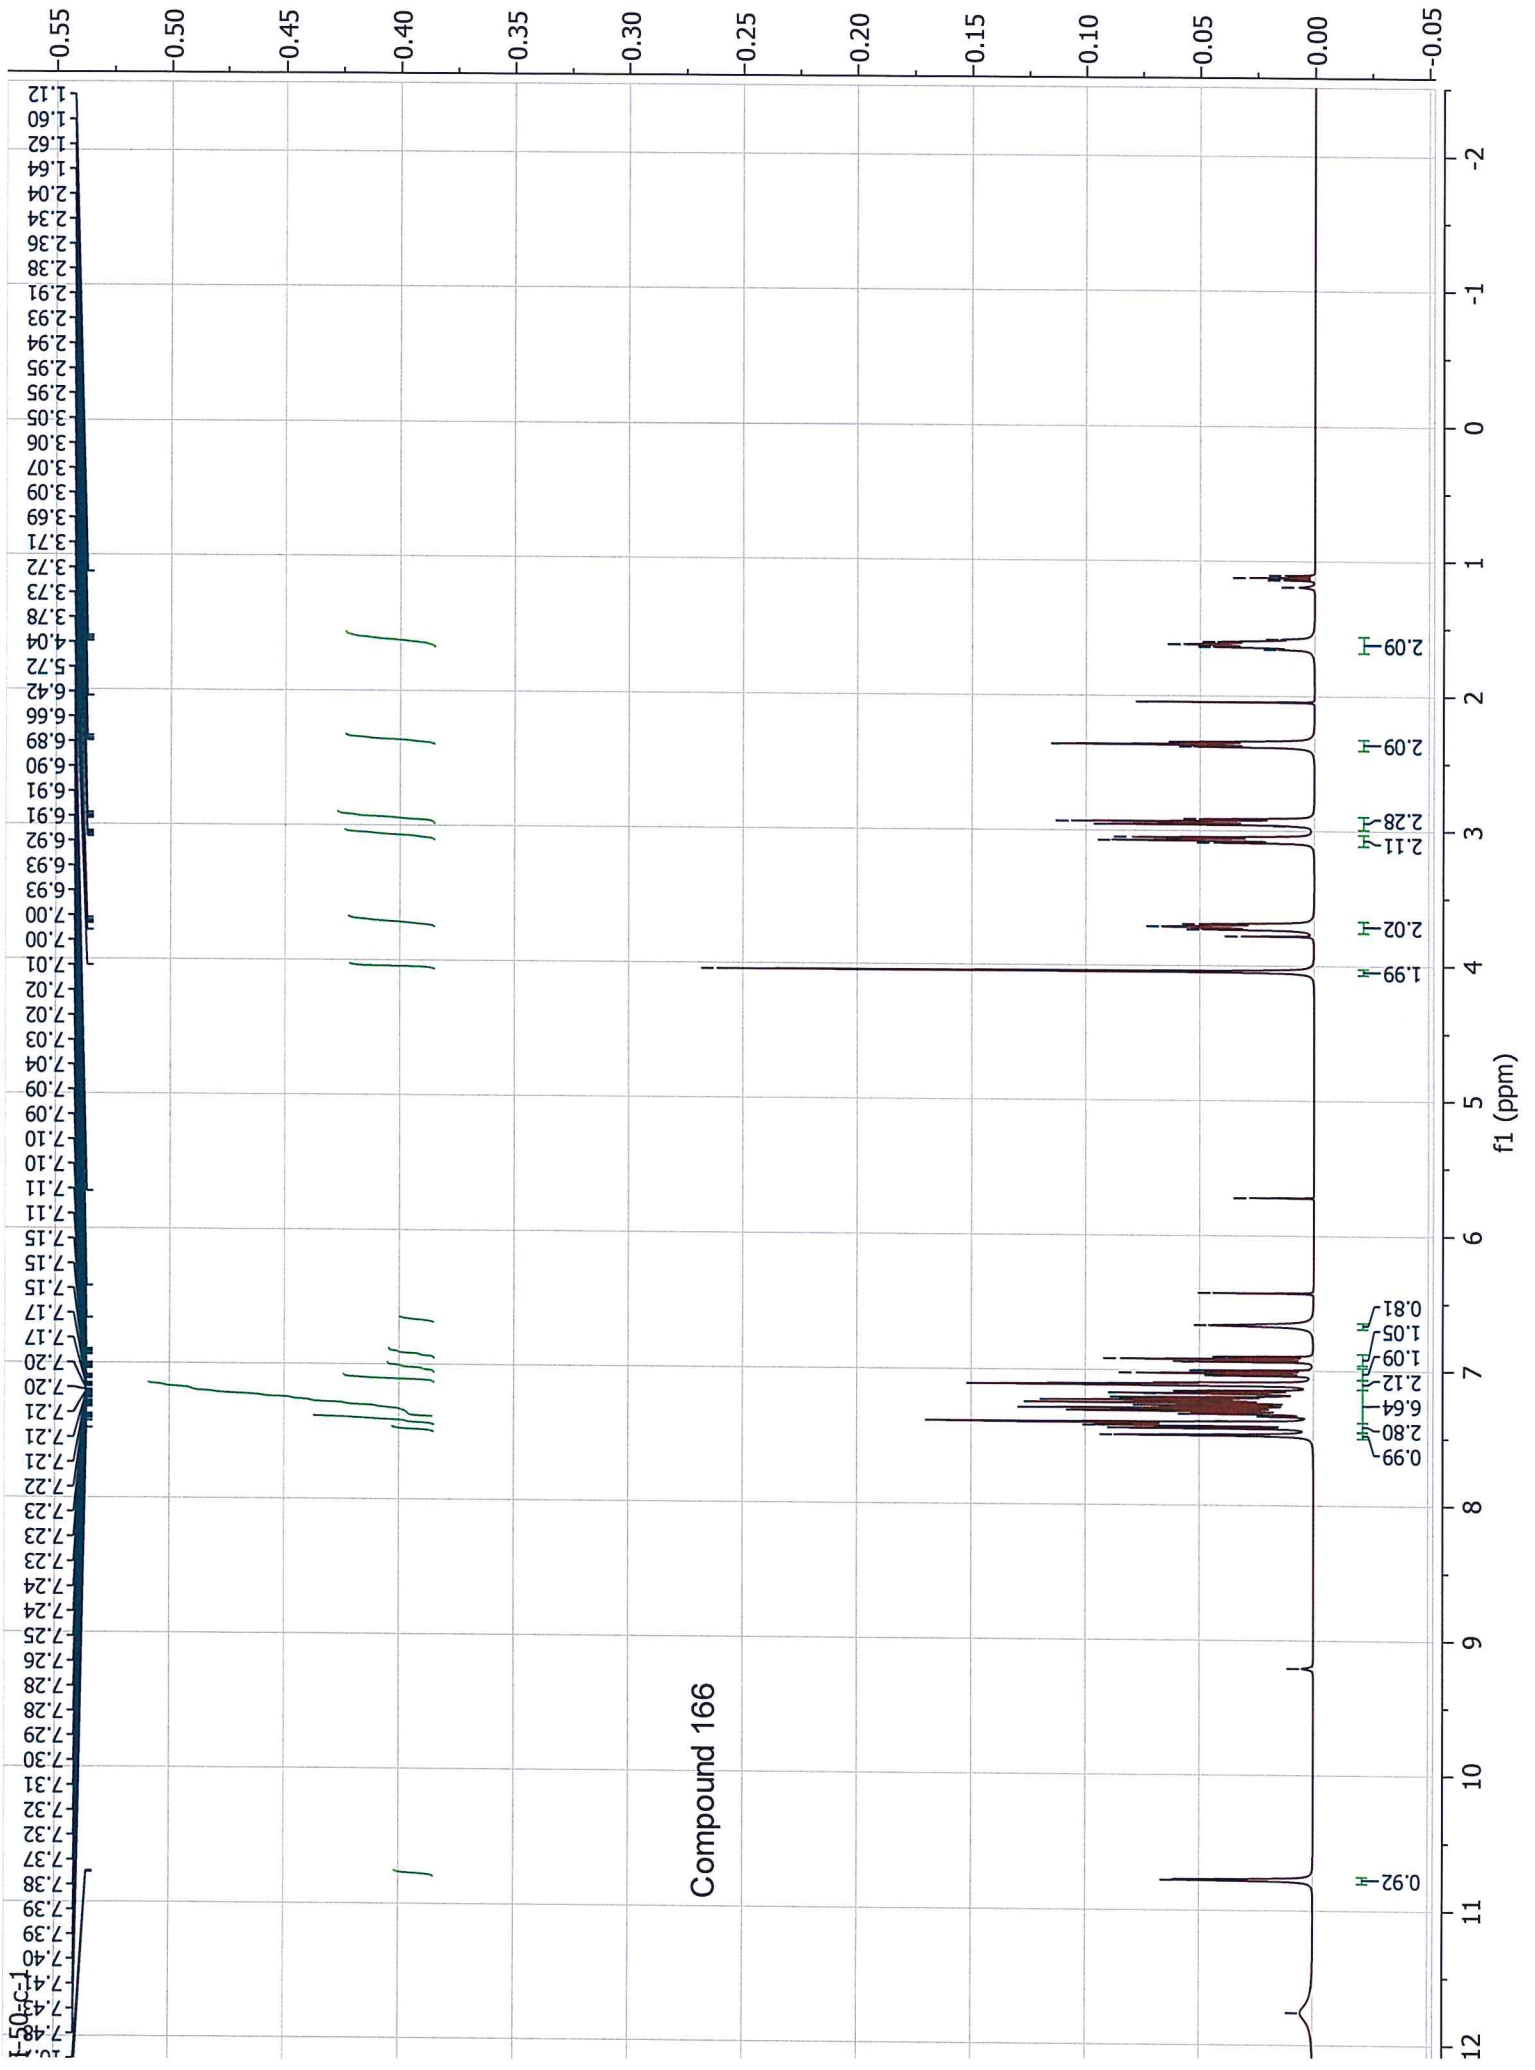



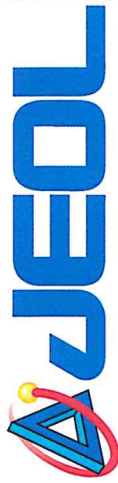

Filename = SW-I-50-C-2\_CARBON-5.  
Author = Delta  
Experiment = single\_pulse\_dec  
Sample\_id = SM-I-50-C-2  
Solvent = DMSO-D6  
Creation\_time = 2-JUN-2016 06:11:15  
Revision\_time = 11-MAR-2021 08:52:15  
Current\_time = 11-MAR-2021 08:52:20

Data\_format = 1D COMPLEX  
Dim\_size = 26214  
Dim\_title = 13C  
Dim\_units = [ppm]  
Dimensions = X  
Site = ECS 400  
Spectrometer = JNM-ECS400

Field\_strength = 9.389766[T] (400 [MHz])  
X\_acq\_duration = 1.04333312[s]  
X\_domain = 13C  
X\_freq = 100.52530333 [MHz]  
X\_offset = 100 [ppm]  
X\_points = 32768  
X\_prescans = 4  
X\_resolution = 0.95846665 [Hz]  
X\_sweep = 31.40703518 [kHz]  
Irr\_domain = 1H  
Irr\_freq = 399.78219838 [MHz]  
Irr\_offset = 5 [ppm]  
Clipped = FALSE  
Mod\_return = 1  
Scans = 12000  
Total\_scans = 12000

X\_90\_width = 12.84 [us]  
X\_acq\_time = 1.04333312 [s]  
X\_angle = 30 [deg]  
X\_atn = 9 [dB]  
X\_pulse = 4.28 [us]  
Irr\_atn\_dec = 27 [dB]  
Irr\_atn\_noe = 27 [dB]  
Irr\_noise = WALTZ  
Decoupling = TRUE  
Initial\_wait = 1 [s]  
Noe = TRUE  
Noe\_time = 3 [s]  
Recvr\_gain = 60  
Relaxation\_delay = 3 [s]  
Repetition\_time = 4.04333312 [s]  
Temp\_get = 20.4 [dC]

COMPOUND 166

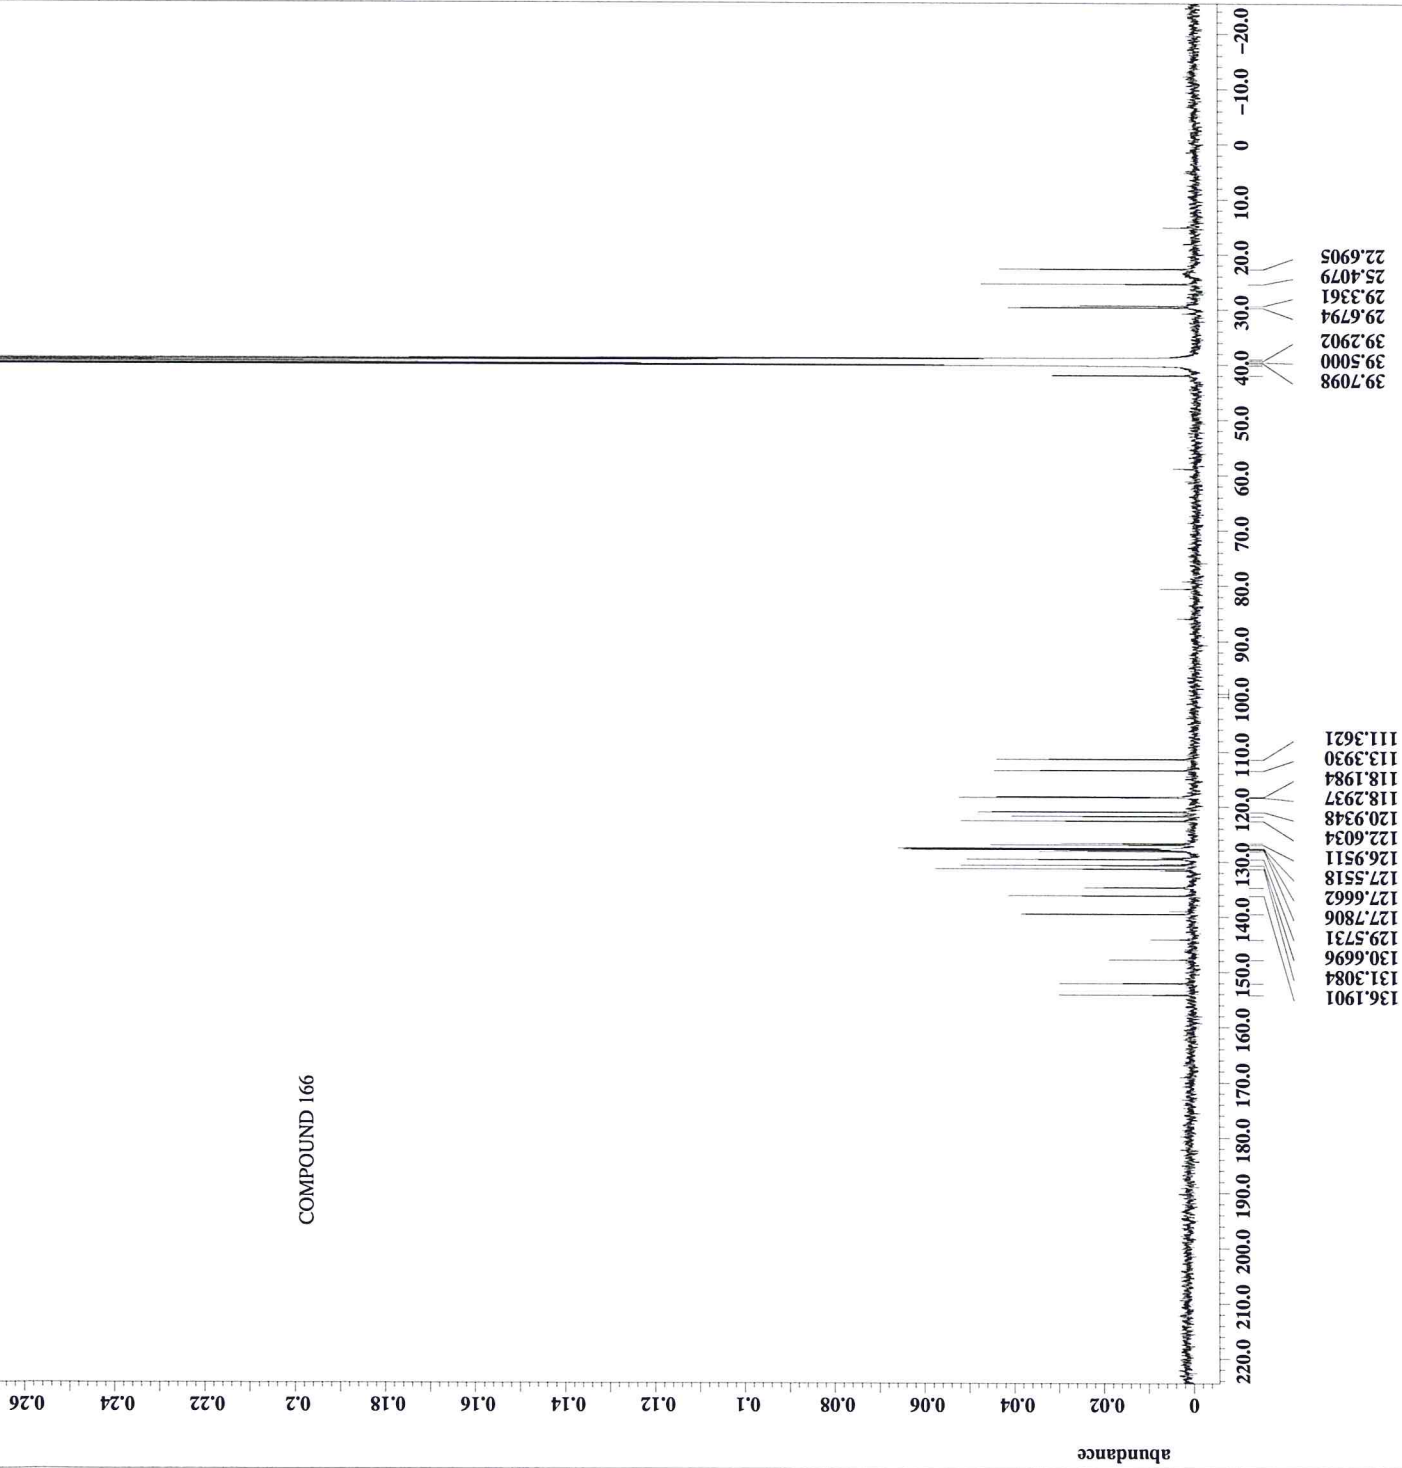

X : parts per Million : 13C

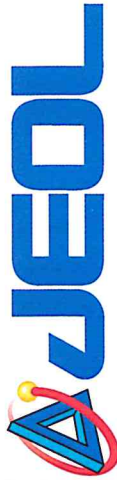

File name = BN-VI-97-C-6-10\_PROTO  
Author = Delta  
Experiment = single\_pulse.ex2  
Sample\_id = BN-VI-97-C-6-10  
Solvent = METHANOL-D3  
Creation time = 10-JUN-2016 14:50:17  
Revision time = 10-MAR-2021 13:22:07  
Current\_time = 10-MAR-2021 13:22:10  
Data\_format = 1D COMPLEX  
Dim\_size = 13107  
Dim\_title = 1H  
Dim\_units = [ppm]  
Dimensions = X  
Site = ECS 400  
Spectrometer = JNM-ECS400  
Field\_strength = 9.389766 [T] (400 [MHz])  
X\_acq\_duration = 2.18365952 [s]  
X\_domain = 1H  
X\_freq = 399.78219838 [MHz]  
X\_offset = 5 [ppm]  
X\_points = 16384  
X\_prescans = 1  
X\_resolution = 0.45794685 [Hz]  
X\_sweep = 7.5030012 [kHz]  
Irr\_domain = 1H  
Irr\_freq = 399.78219838 [MHz]  
Irr\_offset = 5 [ppm]  
Tri\_domain = 1H  
Tri\_freq = 399.78219838 [MHz]  
Tri\_offset = 5 [ppm]  
Clipped = FALSE  
Mod\_return = 1  
Scans = 16  
Total\_scans = 16  
X\_90\_width = 10.68 [us]  
X\_acq\_time = 2.18365952 [s]  
X\_angle = 45 [deg]  
X\_atn = 6 [dB]  
X\_pulse = 5.34 [us]  
Irr\_mode = Off  
Tri\_mode = Off  
Dante\_presat = FALSE  
Initial\_wait = 1 [s]  
Recvr\_gain = 44  
Relaxation\_delay = 4 [s]  
Repetition\_time = 6.18365952 [s]  
Temp\_get = 19.7 [degC]

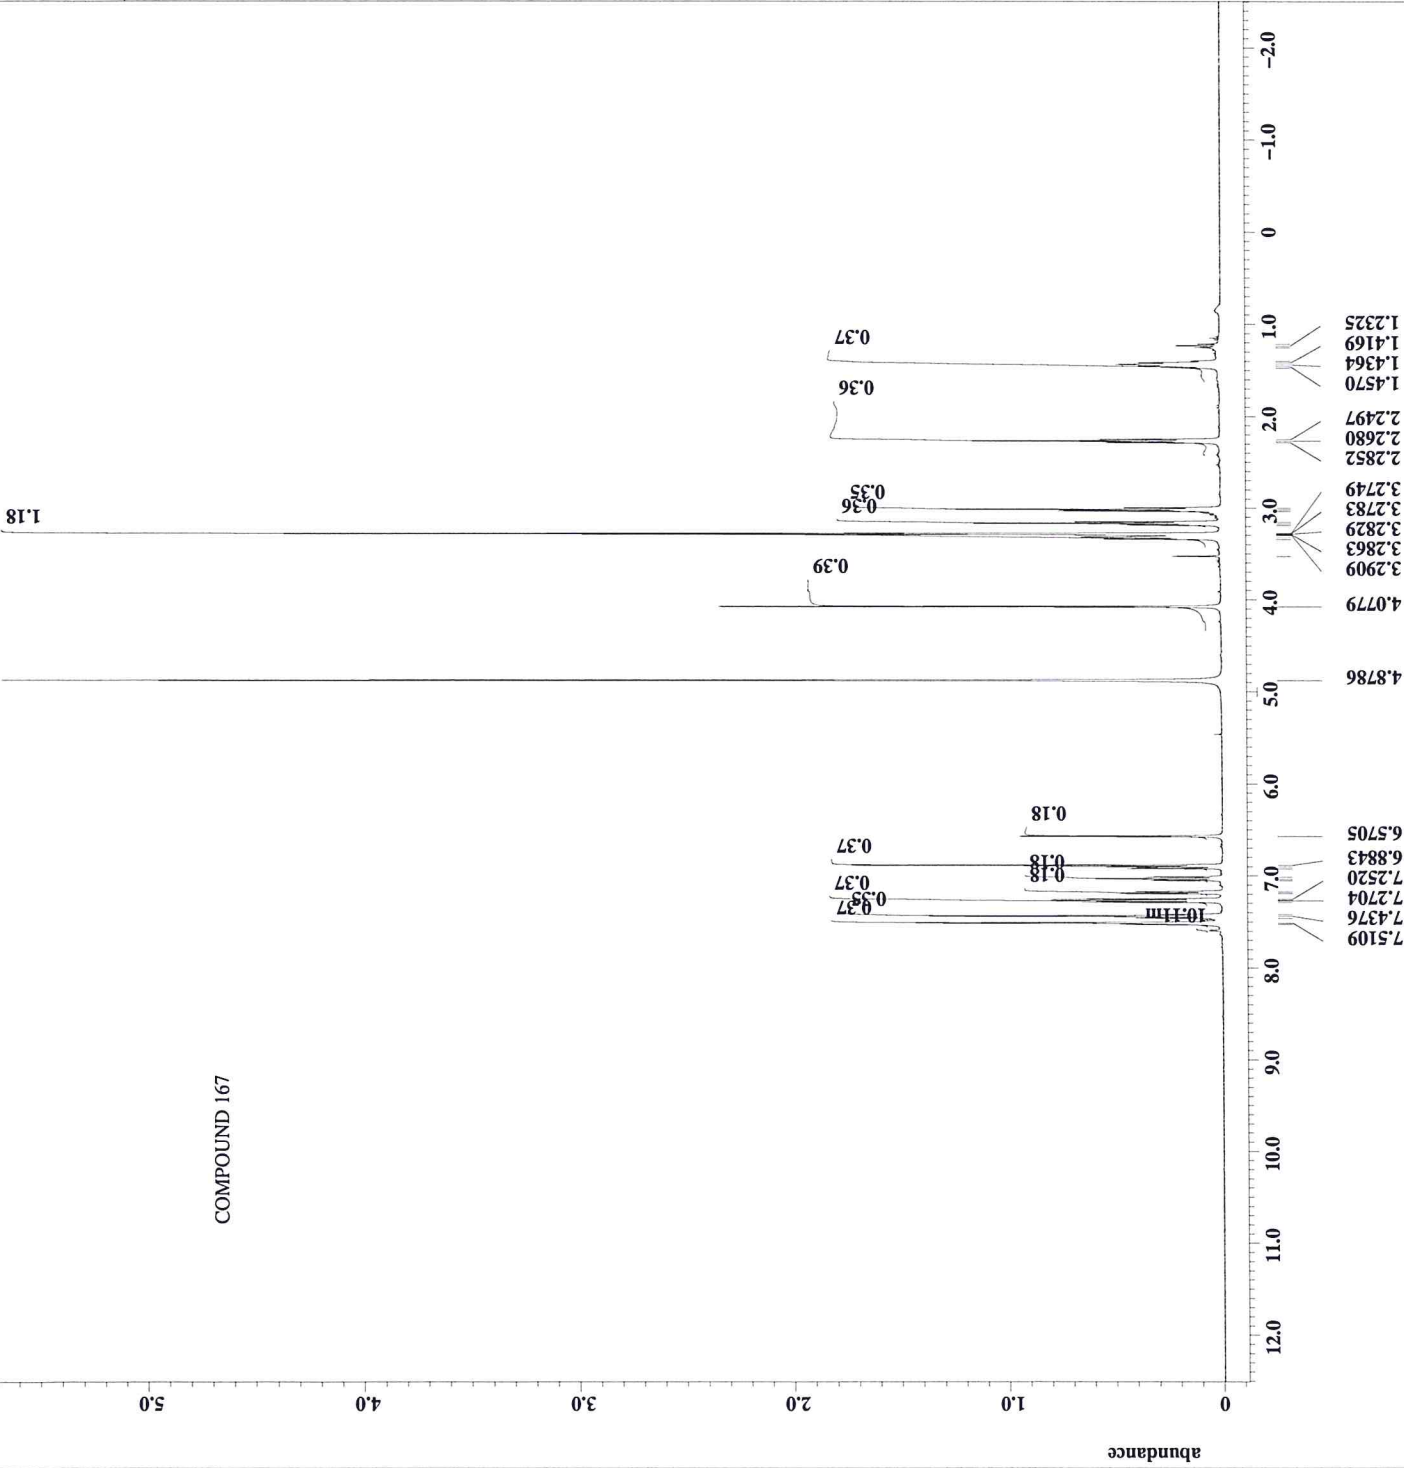

COMPOUND 167

X : parts per Million : 1H

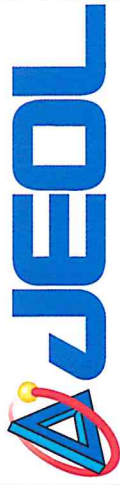

Filename = BN-VI-97-c-6-10\_CARBO  
Author = Delta  
Experiment = single\_pulse\_dec  
Sample\_id = BN-VI-97-c-6-10  
Solvent = METHANOL-D3  
Creation time = 13-JUN-2016 07:37:41  
Revision time = 10-MAR-2021 13:23:59  
Current\_time = 10-MAR-2021 13:24:03  
  
Data\_format = 1D COMPLEX  
Dim\_size = 26214  
Dim\_title = 13C  
Dim\_units = [ppm]  
Dimensions = X  
Site = ECS 400  
Spectrometer = JNM-ECS400  
  
Field\_strength = 9.389766[T] (400[MHz])  
X\_acq\_duration = 1.04333312[s]  
X\_domain = 13C  
X\_freq = 100.52530333[MHz]  
X\_offset = 100[ppm]  
X\_points = 32768  
X\_prescans = 4  
X\_resolution = 0.95846665[Hz]  
X\_sweep = 31.40703518[kHz]  
Irr\_domain = 1H  
Irr\_freq = 399.78219838[MHz]  
Irr\_offset = 5[ppm]  
Clipped = TRUE  
Mod\_return = 1  
Scans = 57628  
Total\_scans = 57628  
  
X\_90\_width = 12.84[us]  
X\_acq\_time = 1.04333312[s]  
X\_angle = 30[deg]  
X\_atn = 9[db]  
X\_pulse = 4.28[us]  
Irr\_atn\_dec = 27[db]  
Irr\_atn\_noe = 27[db]  
Irr\_noise = WALTZ  
Decoupling = TRUE  
Initial\_wait = 1[s]  
Noe = TRUE  
Noe\_time = 3[s]  
Recvr\_gain = 60  
Relaxation\_delay = 3[s]  
Repetition\_time = 4.04333312[s]  
Temp\_get = 20.6[dc]

COMPOUND 167

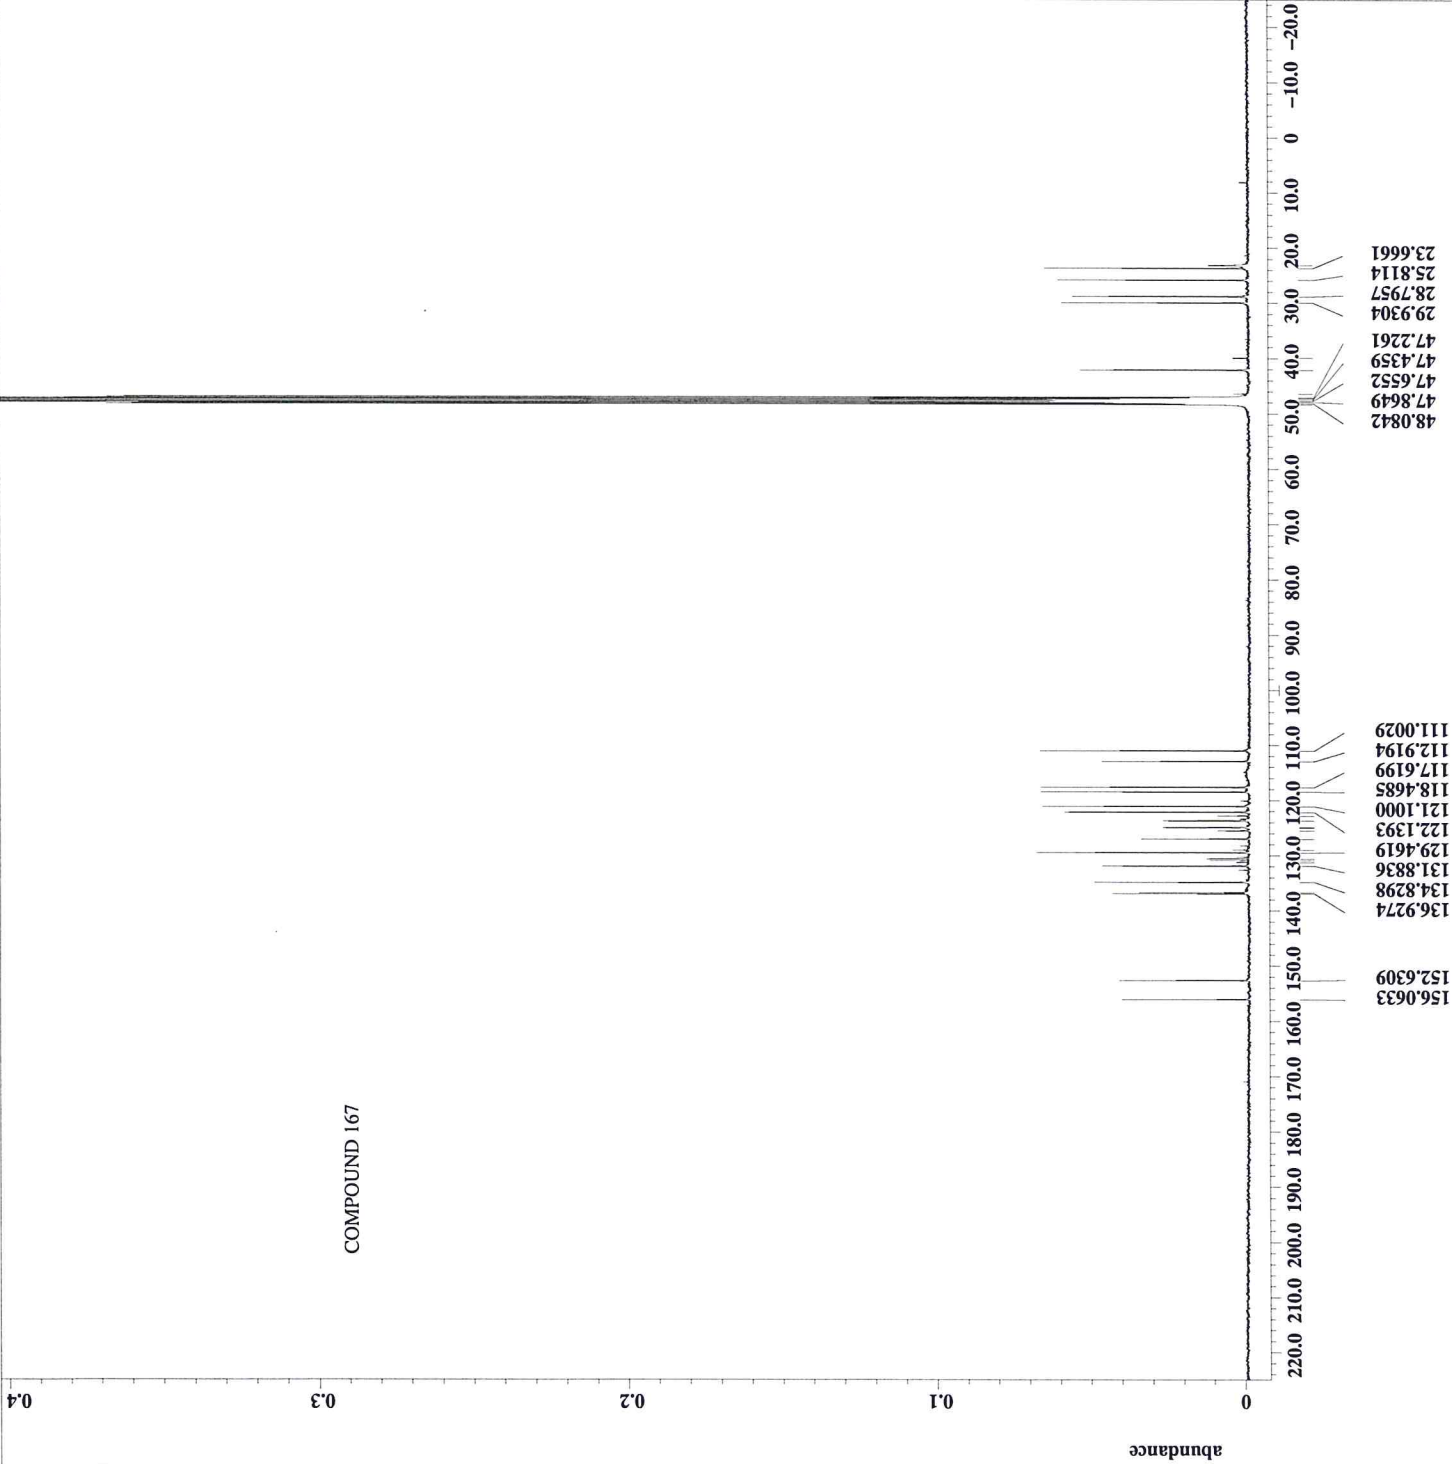

X : parts per Million : 13C

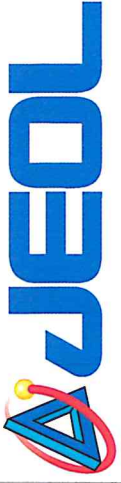

Filename = SM-I-76-F1\_PROTON-4.j  
Author = Delta  
Experiment = single\_pulse.ex2  
Sample\_id = SM-I-76-F1  
Solvent = METHANOL-D3  
Creation\_time = 23-JUN-2016 17:30:41  
Revision\_time = 11-MAR-2021 09:10:36  
Current\_time = 11-MAR-2021 09:10:41  
Data\_format = 1D COMPLEX  
Dim\_size = 13107  
Dim\_title = 1H  
Dim\_units = [ppm]  
Dimensions = X  
Site = ECS 400  
Spectrometer = JNM-ECS400  
Field\_strength = 9.389766[T] (400 [MHz])  
X\_acq\_duration = 2.18365952[s]  
X\_domain = 1H  
X\_freq = 399.78219838 [MHz]  
X\_offset = 5 [ppm]  
X\_points = 16384  
X\_prescans = 1  
X\_resolution = 0.45794685 [Hz]  
X\_sweep = 7.5030012 [kHz]  
Irr\_domain = 1H  
Irr\_freq = 399.78219838 [MHz]  
Irr\_offset = 5 [ppm]  
Tri\_domain = 1H  
Tri\_freq = 399.78219838 [MHz]  
Tri\_offset = 5 [ppm]  
Clipped = FALSE  
Mod\_return = 1  
Scans = 16  
Total\_scans = 16  
X\_90\_width = 10.68 [us]  
X\_acq\_time = 2.18365952 [s]  
X\_angle = 45 [deg]  
X\_atn = 6 [dB]  
X\_pulse = 5.34 [us]  
Irr\_mode = Off  
Tri\_mode = Off  
Dante\_presat = FALSE  
Initial\_wait = 1 [s]  
Recvr\_gain = 40  
Relaxation\_delay = 4 [s]  
Repetition\_time = 6.18365952 [s]  
Temp\_get = 20.4 [dC]

COMPOUND 168

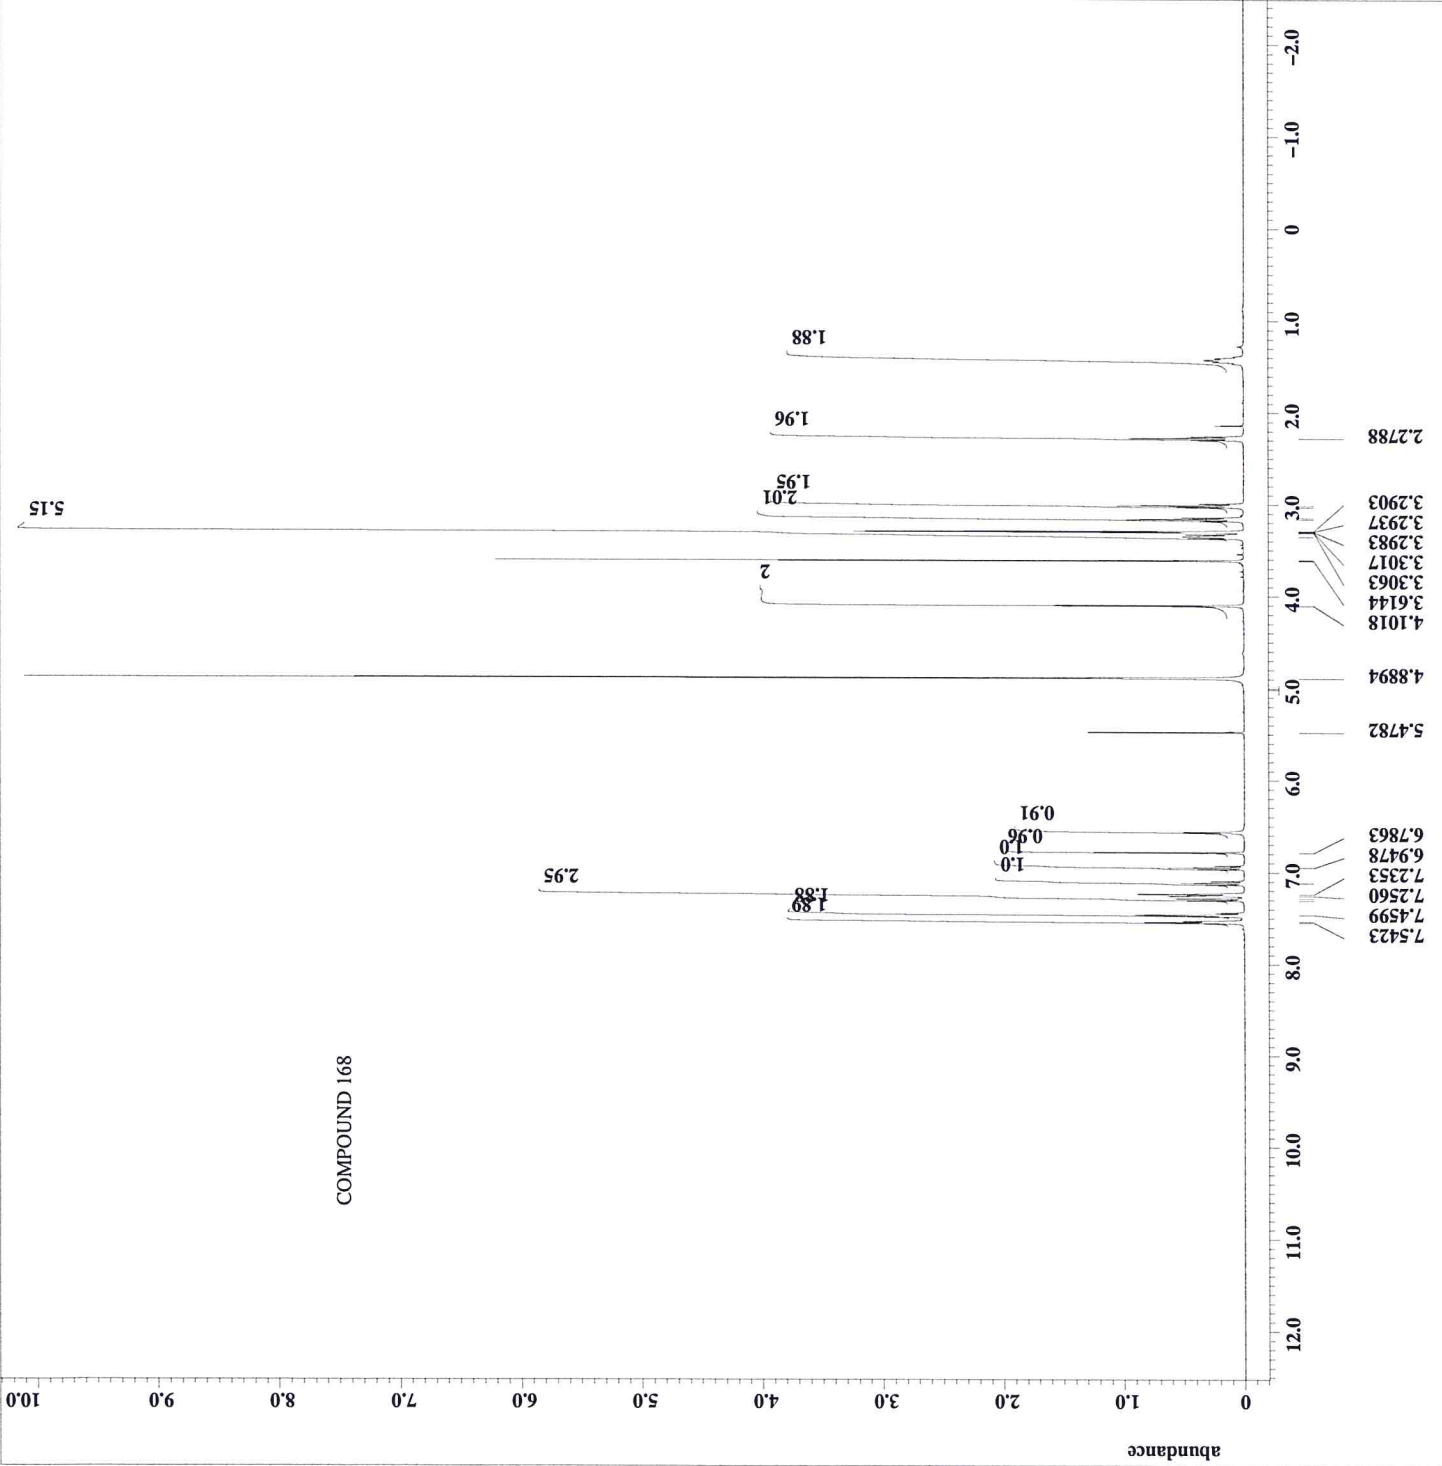

X : parts per Million : 1H



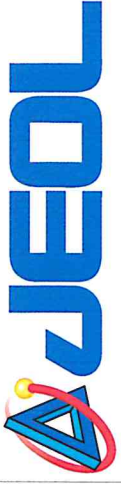

Filename = SM-I-76-F1\_CARBON-5.j  
Author = Delta  
Experiment = single\_pulse\_dec  
Sample\_id = SM-I-76-F1  
Solvent = METHANOL-D3  
Creation\_time = 24-JUN-2016 09:14:19  
Revision\_time = 11-MAR-2021 09:12:40  
Current\_time = 11-MAR-2021 09:12:45  
Data\_format = 1D COMPLEX  
Dim\_size = 26214  
Dim\_title = 13C  
Dim\_units = [ppm]  
Dimensions = X  
Site = ECS 400  
Spectrometer = JNM-ECS400  
Field\_strength = 9.389766[T] (400 [MHz])  
X\_acq\_duration = 1.04333312[s]  
X\_domain = 13C  
X\_freq = 100.52530333 [MHz]  
X\_offset = 100 [ppm]  
X\_points = 32768  
X\_prescans = 4  
X\_resolution = 0.95846665 [Hz]  
X\_sweep = 31.40703518 [kHz]  
Irr\_domain = 1H  
Irr\_freq = 399.78219838 [MHz]  
Irr\_offset = 5 [ppm]  
Clipped = FALSE  
Mod\_return = 1  
Scans = 13958  
Total\_scans = 13958  
X\_90\_width = 12.84 [us]  
X\_acq\_time = 1.04333312 [s]  
X\_angle = 30 [deg]  
X\_atn = 9 [dB]  
X\_pulse = 4.28 [us]  
Irr\_atn\_dec = 27 [dB]  
Irr\_atn\_noe = 27 [dB]  
Irr\_noise = WALTZ  
Decoupling = TRUE  
Initial\_wait = 1 [s]  
Noe = TRUE  
Noe\_time = 3 [s]  
Recvr\_gain = 60  
Relaxation\_delay = 3 [s]  
Repetition\_time = 4.04333312 [s]  
Temp\_get = 20.4 [dC]

COMPOUND 168

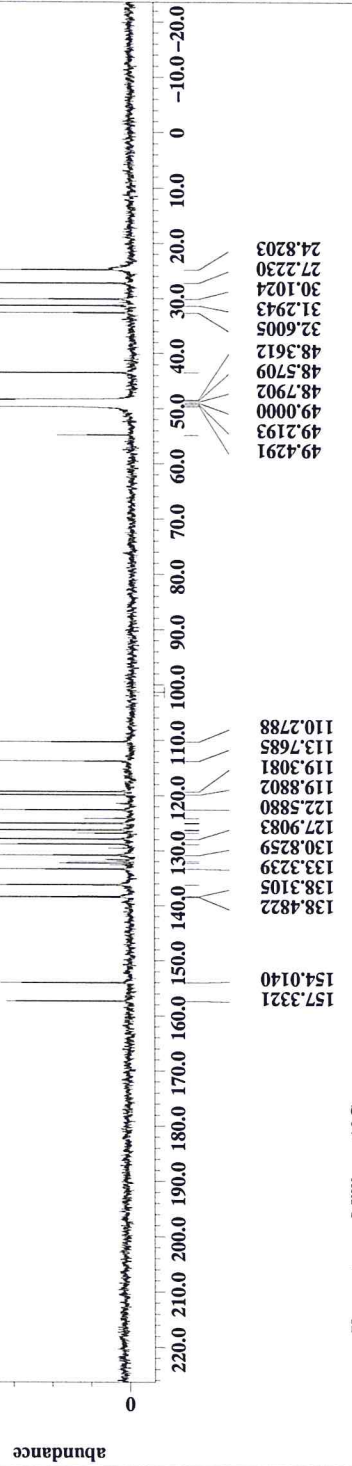

X : parts per Million : 13C

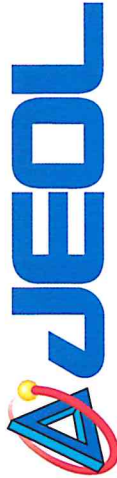

File name = MM-I-63\_PROTON-6.jdf  
Author = Delta  
Experiment = single\_pulse.ex2  
Sample\_id = MM-I-63  
Solvent = DMSO-D6  
Creation time = 12-OCT-2016 12:14:43  
Revision time = 10-MAR-2021 11:54:55  
Current\_time = 10-MAR-2021 11:54:59  
Data\_format = 1D COMPLEX  
Dim\_size = 13107  
Dim\_title = 1H  
Dim\_units = [ppm]  
Dimensions = X  
Site = ECS 400  
Spectrometer = JNM-ECS400  
Field\_strength = 9.389766 [T] (400 [MHz])  
X\_acq\_duration = 2.18365952 [s]  
X\_domain = 1H  
X\_freq = 399.78219838 [MHz]  
X\_offset = 5 [ppm]  
X\_points = 16384  
X\_prescans = 1  
X\_resolution = 0.45794685 [Hz]  
X\_sweep = 7.5030012 [kHz]  
Irr\_domain = 1H  
Irr\_freq = 399.78219838 [MHz]  
Irr\_offset = 5 [ppm]  
Tri\_domain = 1H  
Tri\_freq = 399.78219838 [MHz]  
Tri\_offset = 5 [ppm]  
Clipped = FALSE  
Mod\_return = 1  
Scans = 16  
Total\_scans = 16  
X\_90\_width = 10.68 [us]  
X\_acq\_time = 2.18365952 [s]  
X\_angle = 45 [deg]  
X\_atn = 6 [dB]  
X\_pulse = 5.34 [us]  
Irr\_mode = Off  
Tri\_mode = Off  
Dante\_presat = FALSE  
Initial\_wait = 1 [s]  
Recvr\_gain = 38  
Relaxation\_delay = 4 [s]  
Repetition\_time = 6.18365952 [s]  
Temp\_get = 20.1 [dC]

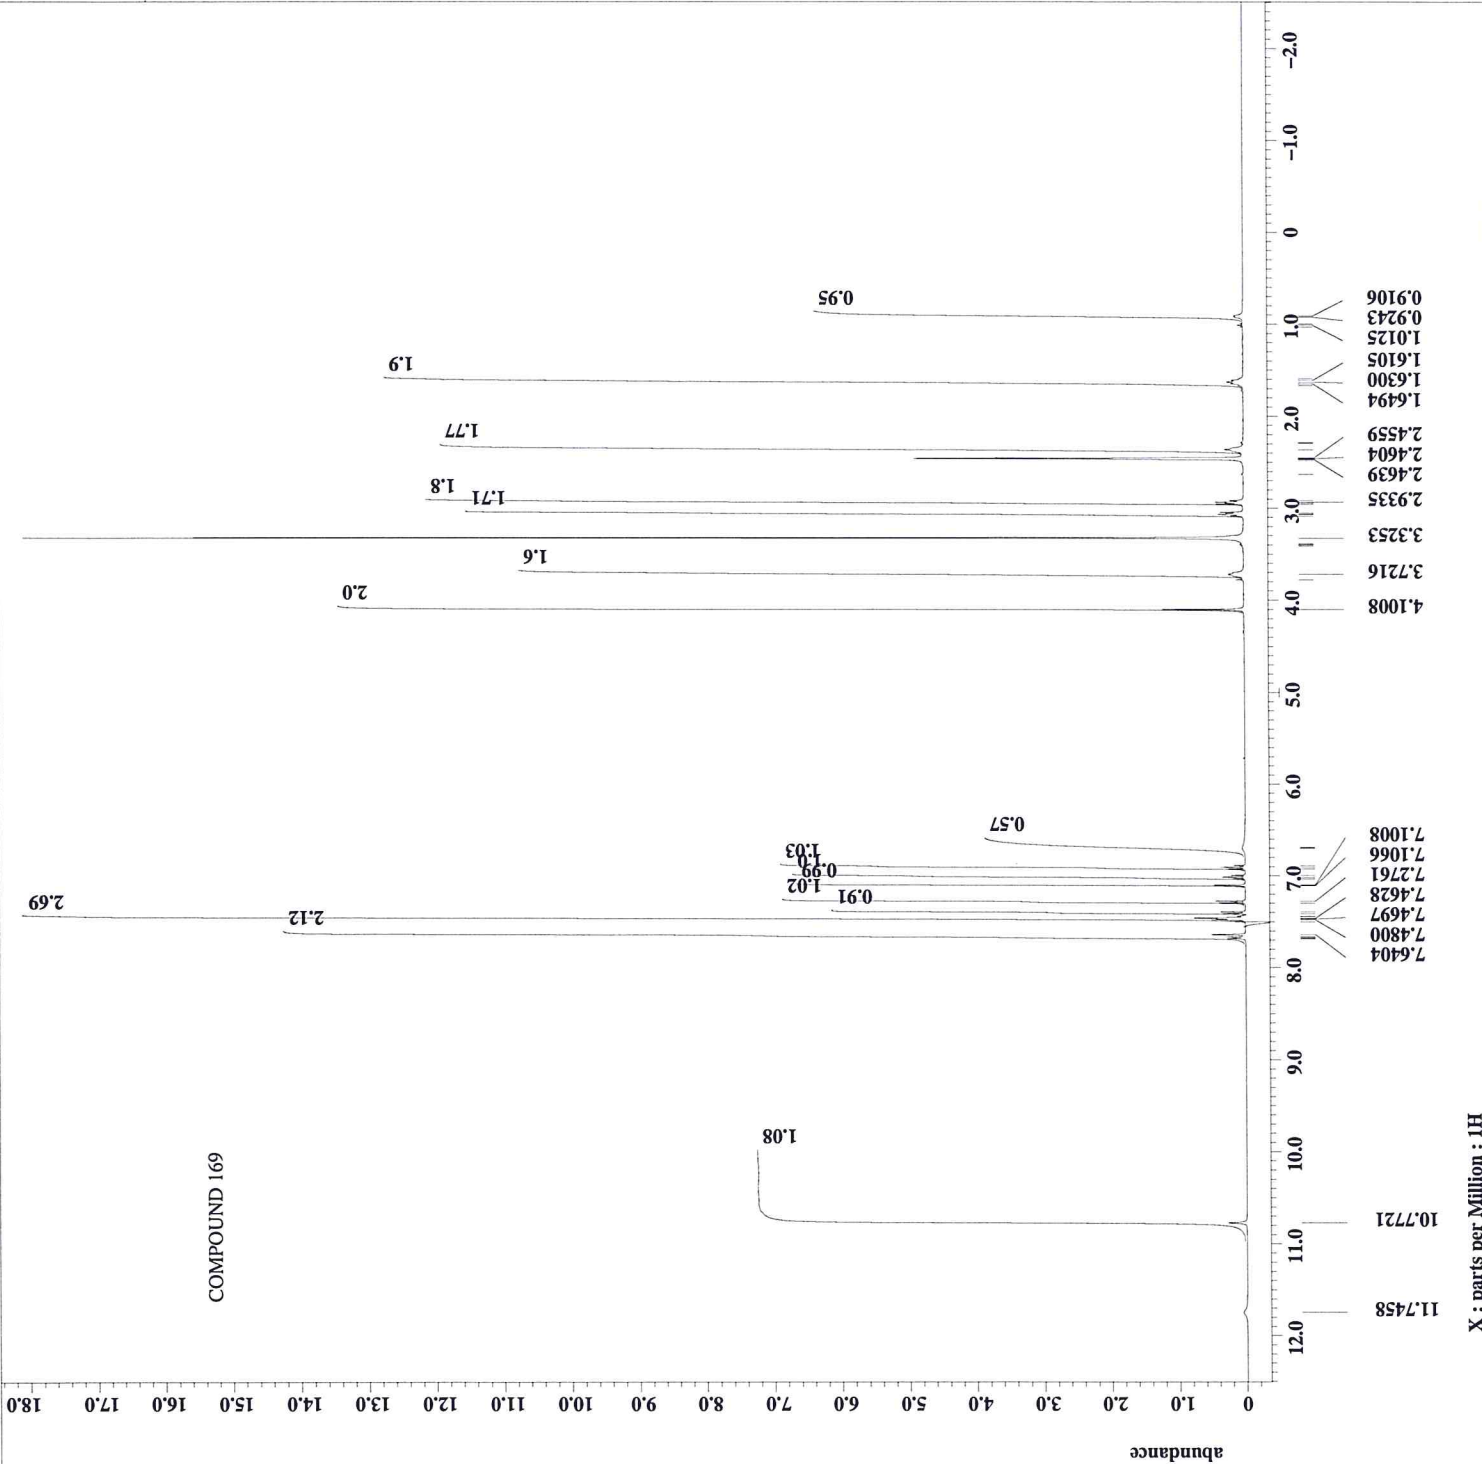

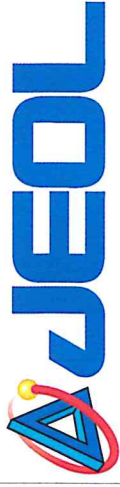

```

Filename = MM-I-63_CARBON-6.jdf
Author = Delta
Experiment = single_pulse_dec
Sample_id = MM-I-63
Solvent = DMSO-D6
Creation_time = 13-OCT-2016 08:38:32
Revision_time = 10-MAR-2021 11:57:33
Current_time = 10-MAR-2021 11:57:38

Data_format = 1D COMPLEX
Dim_size = 26214
Dim_title = 13C
Dim_units = [ppm]
Dimensions = X
Site = ECS 400
Spectrometer = JNM-ECS400

Field_strength = 9.389766 [T] (400 [MHz])
X_acq_duration = 1.04333312 [s]
X_domain = 13C
X_freq = 100.52530333 [MHz]
X_offset = 100 [ppm]
X_points = 32768
X_prescans = 4
X_resolution = 0.95846665 [Hz]
X_sweep = 31.40703518 [kHz]
Irr_domain = 1H
Irr_freq = 399.78219838 [MHz]
Irr_offset = 5 [ppm]
Clipped = TRUE
Mod_return = 1
Scans = 13640
Total_scans = 13640

X_90_width = 12.84 [us]
X_acq_time = 1.04333312 [s]
X_angle = 30 [deg]
X_atn = 9 [dB]
X_pulse = 4.28 [us]
Irr_atn_dec = 27 [dB]
Irr_atn_noe = 27 [dB]
Decoupling = WALTZ
Initial_wait = 1 [s]
Noe = TRUE
Noe_time = 3 [s]
Recvr_gain = 60
Relaxation_delay = 3 [s]
Repetition_time = 4.04333312 [s]
Temp_get = 20.4 [dC]

```

COMPOUND 169

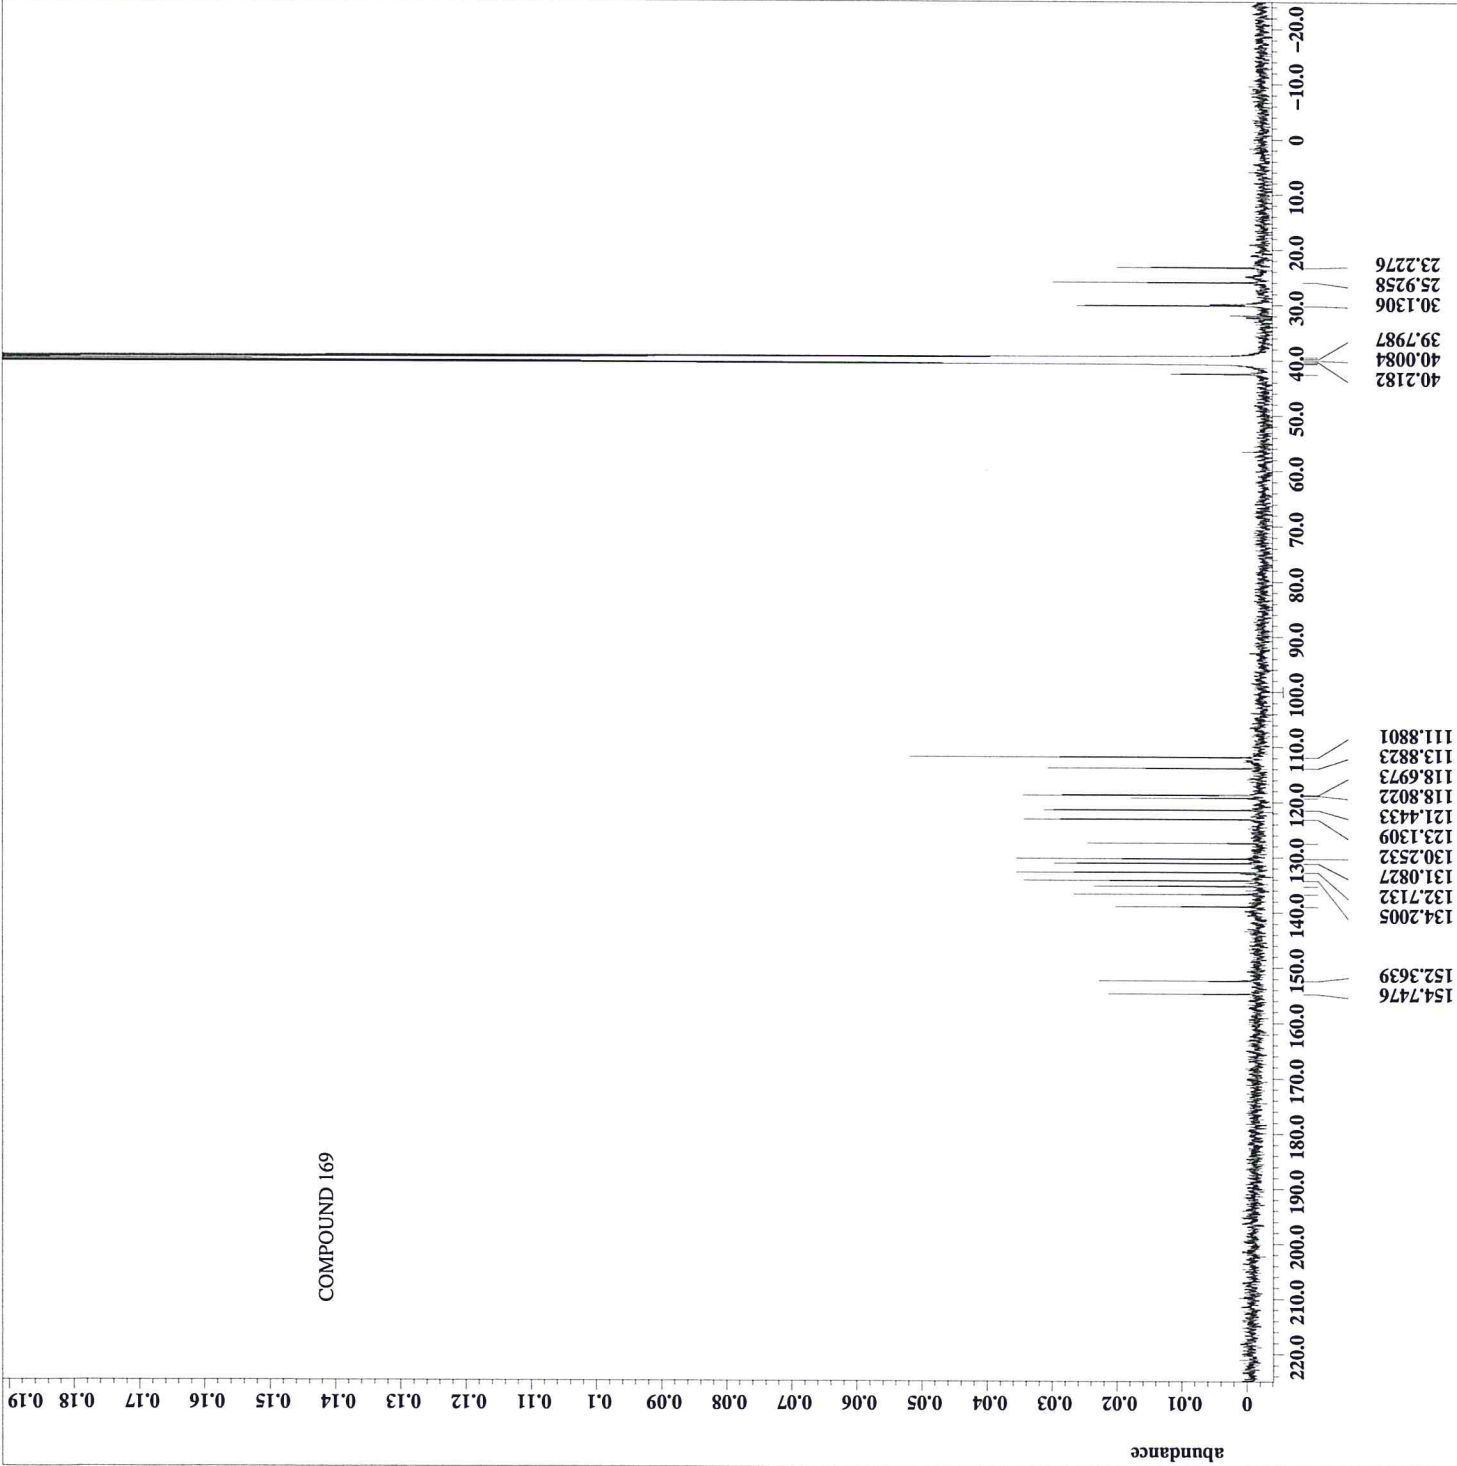

X : parts per Million : 13C

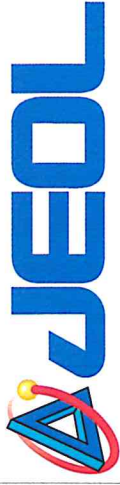

COMPOUND 170

```

File name      = MM-I-43_PROTON-5.jdf
Author        = Delta
Experiment    = single_pulse.ex2
Sample ID     = MM-I-43
Solvent       = METHANOL-D3
Creation time = 21-JUL-2016 10:21:24
Revision time = 10-MAR-2021 13:31:46
Current time  = 10-MAR-2021 13:31:50

Data format   = 1D COMPLEX
Dim size      = 13107
Dim title     = 1H
Dim units     = [ppm]
Dimensions    = X
Site          = ECS 400
Spectrometer  = JNM-ECS400

Field strength = 9.389766 [T] (400 [MHz])
X_acq_duration = 2.18365952 [s]
X_domain      = 1H
X_freq        = 399.78219838 [MHz]
X_offset      = 5 [ppm]
X_points      = 16384
X_prescans    = 1
X_resolution  = 0.45794685 [Hz]
X_sweep       = 7.5030012 [kHz]
Irr_domain    = 1H
Irr_freq      = 399.78219838 [MHz]
Irr_offset    = 5 [ppm]
Tri_domain    = 1H
Tri_freq      = 399.78219838 [MHz]
Tri_offset    = 5 [ppm]
Clipped       = FALSE
Mod_return    = 1
Total_scans   = 16

X_90_width    = 10.68 [us]
X_acq_time    = 2.18365952 [s]
X_angle       = 45 [deg]
X_atn         = 6 [dB]
X_pulse       = 5.34 [us]
Irr_mode      = Off
Tri_mode      = Off
Dante_presat  = FALSE
Initial_wait  = 1 [s]
Recvr_gain    = 46
Relaxation_delay = 4 [s]
Repetition_time = 6.18365952 [s]
Temp_get      = 20 [dC]
  
```

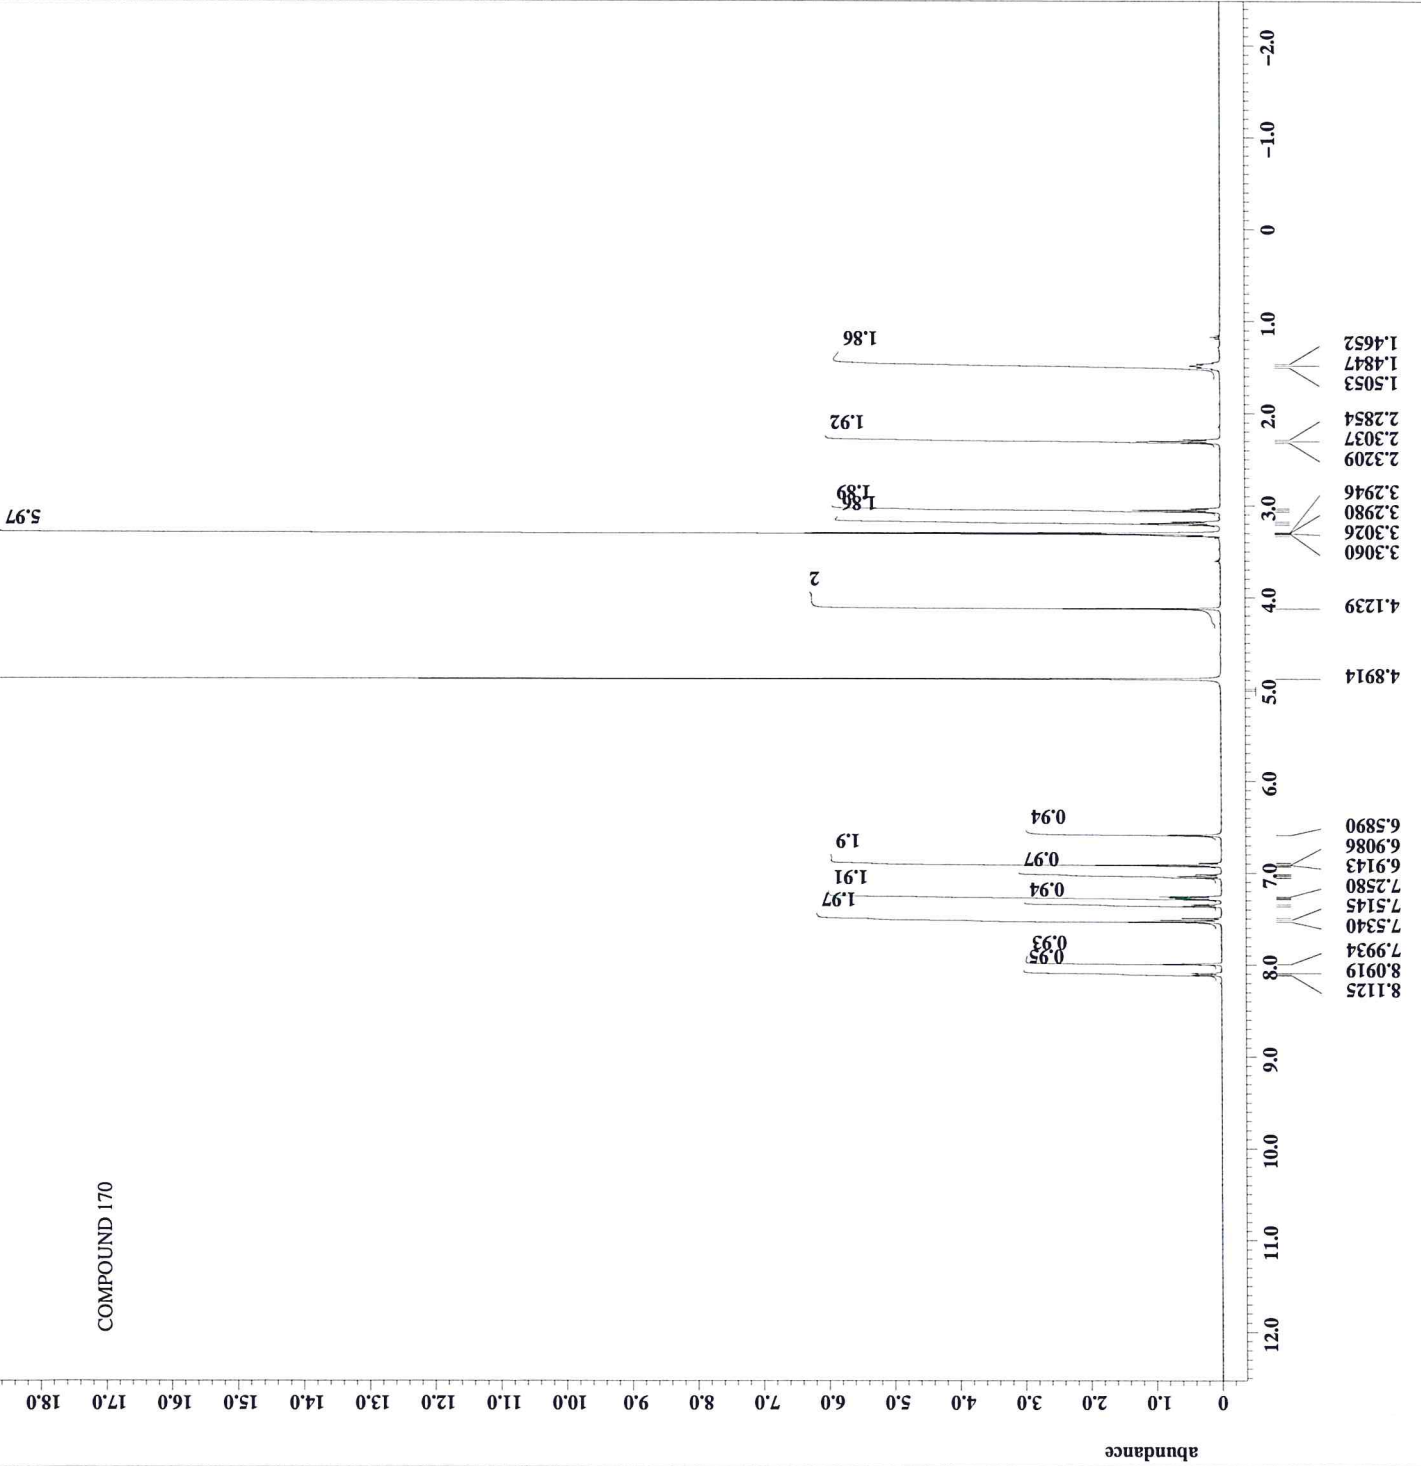

X : parts per Million : 1H



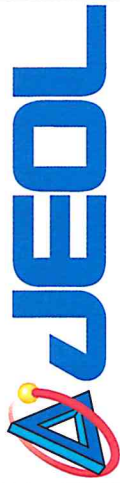

Filename = MM-I-43\_CARBON-5.jdf  
Author = Delta  
Experiment = single\_pulse\_dec  
Sample\_id = MM-I-43  
Solvent = METHANOL-D3  
Creation\_time = 21-JUL-2016 14:41:52  
Revision\_time = 10-MAR-2021 13:34:22  
Current\_time = 10-MAR-2021 13:34:26  
Data\_format = 1D COMPLEX  
Dim\_size = 26214  
Dim\_title = 13C  
Dim\_units = [ppm]  
Dimensions = X  
Site = ECS 400  
Spectrometer = JNM-ECS400  
Field\_strength = 9.389766[T] (400 [MHz])  
X\_acq\_duration = 1.04333312[s]  
X\_domain = 13C  
X\_freq = 100.52530333 [MHz]  
X\_offset = 100 [ppm]  
X\_points = 32768  
X\_prescans = 4  
X\_resolution = 0.95846665 [Hz]  
X\_sweep = 31.40703518 [kHz]  
Irr\_domain = 1H  
Irr\_freq = 399.78219838 [MHz]  
Irr\_offset = 5 [ppm]  
Clipped = FALSE  
Mod\_return = 1  
Scans = 3837  
Total\_scans = 3837  
X\_90\_width = 12.84 [us]  
X\_acq\_time = 1.04333312 [s]  
X\_angle = 30 [deg]  
X\_atn = 9 [dB]  
X\_pulse = 4.28 [us]  
Irr\_atn\_dec = 27 [dB]  
Irr\_atn\_noe = 27 [dB]  
Irr\_noise = WALTZ  
Decoupling = TRUE  
Initial\_wait = 1 [s]  
Noe = TRUE  
Noe\_time = 3 [s]  
Recvr\_gain = 60  
Relaxation\_delay = 3 [s]  
Repetition\_time = 4.04333312 [s]  
Temp\_get = 20.2 [dC]

COMPOUND 170

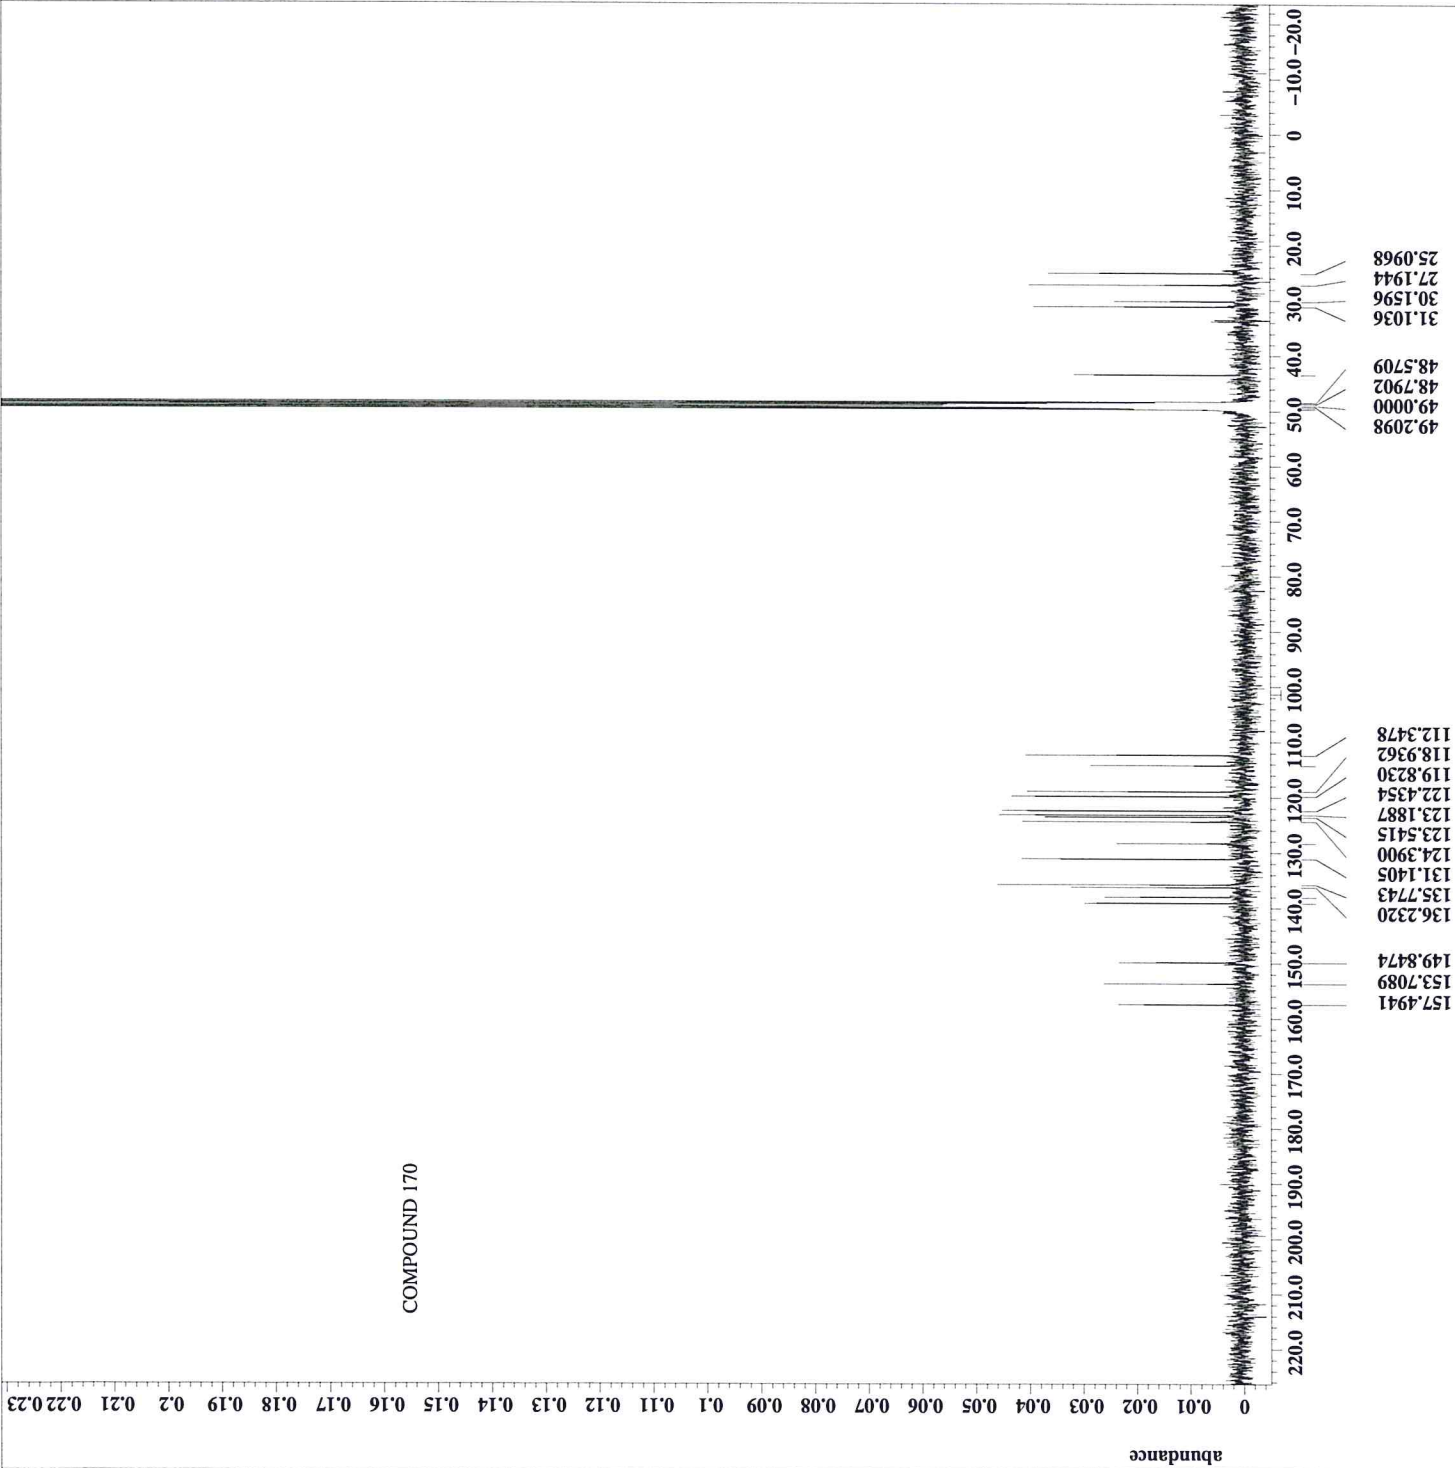

X : parts per Million : 13C

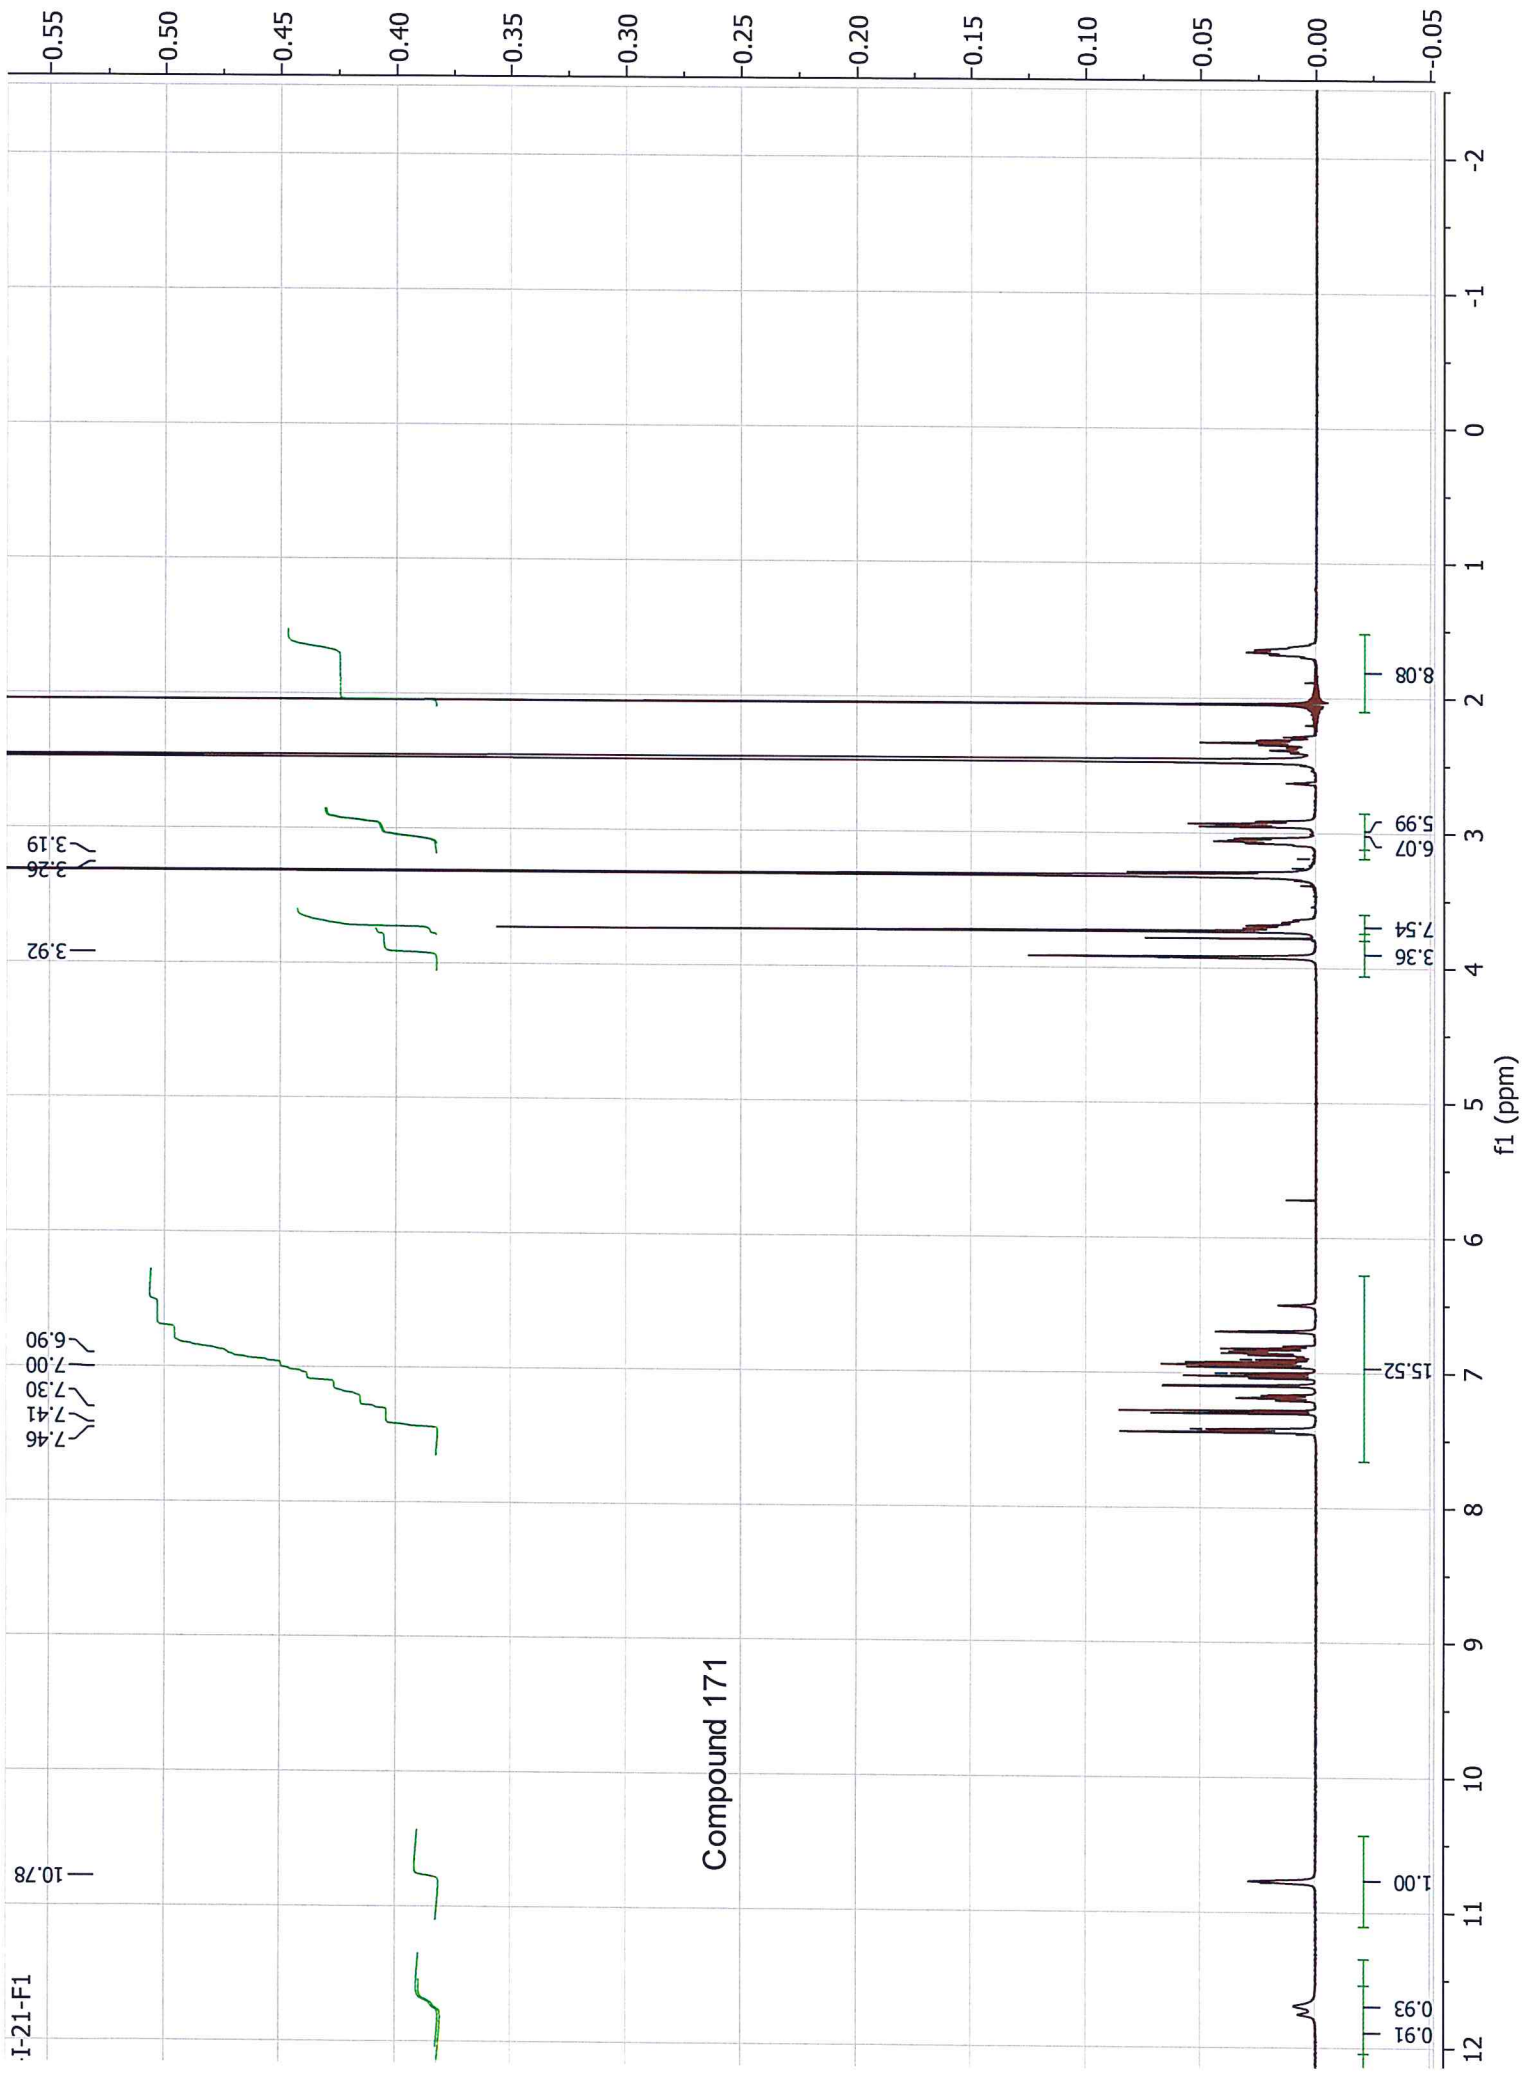

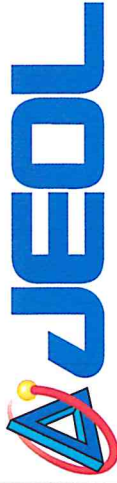

File name = MM-I-21-F1\_CARBON-5.j  
Author = Delta  
Experiment = single\_pulse\_dec  
Sample\_id = MM-I-21-F1  
Solvent = DMSO-D6  
Creation time = 2-MAY-2016 07:35:26  
Revision time = 10-MAR-2021 13:38:11  
Current\_time = 10-MAR-2021 13:38:15  
Data\_format = 1D COMPLEX  
Dim\_size = 26214  
Dim\_title = 13C  
Dim\_units = [ppm]  
Dimensions = X  
Site = ECS 400  
Spectrometer = JNM-ECS400  
Field\_strength = 9.389766[T] (400[MHz])  
X\_acq\_duration = 1.04333312[s]  
X\_domain = 13C  
X\_freq = 100.52530333[MHz]  
X\_offset = 100[ppm]  
X\_points = 32768  
X\_prescans = 4  
X\_resolution = 0.95846665[Hz]  
X\_sweep = 31.40703518[kHz]  
Irr\_domain = 1H  
Irr\_freq = 399.78219838[MHz]  
Irr\_offset = 5[ppm]  
Clipped = FALSE  
Mod\_return = 1  
Scans = 57480  
Total\_scans = 57480  
X\_90\_width = 12.84[us]  
X\_acq\_time = 1.04333312[s]  
X\_angle = 30[deg]  
X\_atn = 9[db]  
X\_pulse = 4.28[us]  
Irr\_atn\_dec = 27[db]  
Irr\_atn\_noe = 27[db]  
Irr\_noise = WALTZ  
Decoupling = TRUE  
Initial\_wait = 1[s]  
Noe = TRUE  
Noe\_time = 3[s]  
Recvr\_gain = 60  
Relaxation\_delay = 3[s]  
Repetition\_time = 4.04333312[s]  
Temp\_get = 21.1[degC]

COMPOUND 171

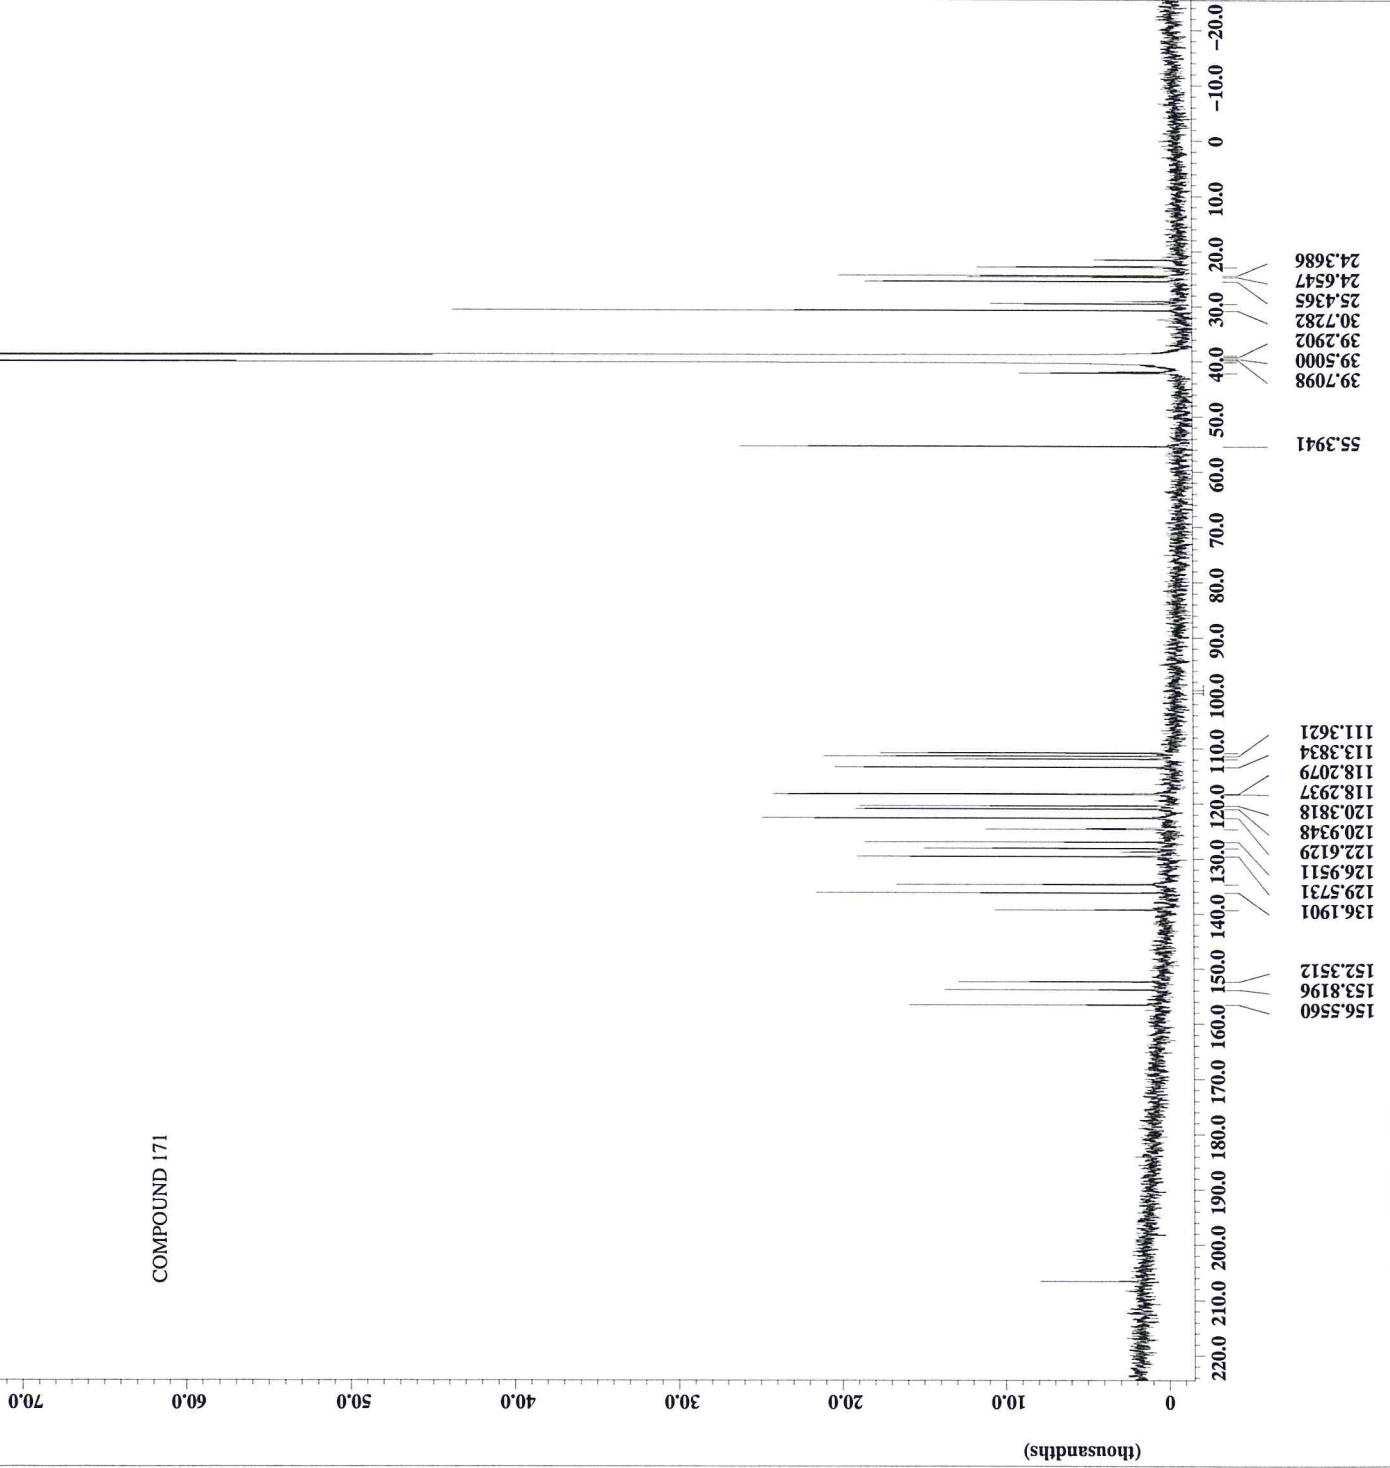

X : parts per Million : 13C

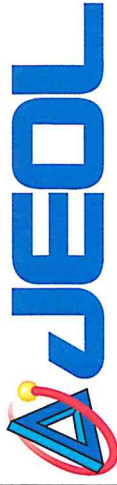

COMPOUND 172

Filename = BN-VI-61-c\_PROTON-4.j  
Author = Neumann  
Experiment = single\_pulse.ex2  
Sample\_id = BN-VI-61-c  
Solvent = DMSO-D6  
Creation\_time = 21-OCT-2015 10:41:08  
Revision\_time = 10-MAR-2021 11:39:53  
Current\_time = 10-MAR-2021 11:39:57

Data\_format = 1D COMPLEX  
Dim\_size = 13107  
Dim\_title = 1H  
Dim\_units = [ppm]  
Dimensions = X  
Site = ECS 400  
Spectrometer = JNM-ECS400

Field\_strength = 9.389766[T] (400 [MHz])  
X\_acq\_duration = 2.18365952[s]  
X\_domain = 1H  
X\_freq = 399.78219838 [MHz]  
X\_offset = 5 [ppm]  
X\_points = 16384  
X\_prescans = 1  
X\_resolution = 0.45794685 [Hz]  
X\_sweep = 7.5030012 [kHz]  
Irr\_domain = 1H  
Irr\_freq = 399.78219838 [MHz]  
Irr\_offset = 5 [ppm]  
Tri\_domain = 1H  
Tri\_freq = 399.78219838 [MHz]  
Tri\_offset = 5 [ppm]  
Clipped = FALSE  
Mod\_return = 1  
Scans = 16  
total\_scans = 16

X\_90\_width = 10.58 [us]  
X\_acq\_time = 2.18365952 [s]  
X\_angle = 45 [deg]  
X\_atn = 6 [dB]  
X\_pulse = 5.29 [us]  
Irr\_mode = Off  
Tri\_mode = Off  
Dante\_presat = FALSE  
Initial\_wait = 1 [s]  
Recvr\_gain = 38  
Relaxation\_delay = 4 [s]  
Repetition\_time = 6.18365952 [s]  
temp\_get = 20.2 [degC]

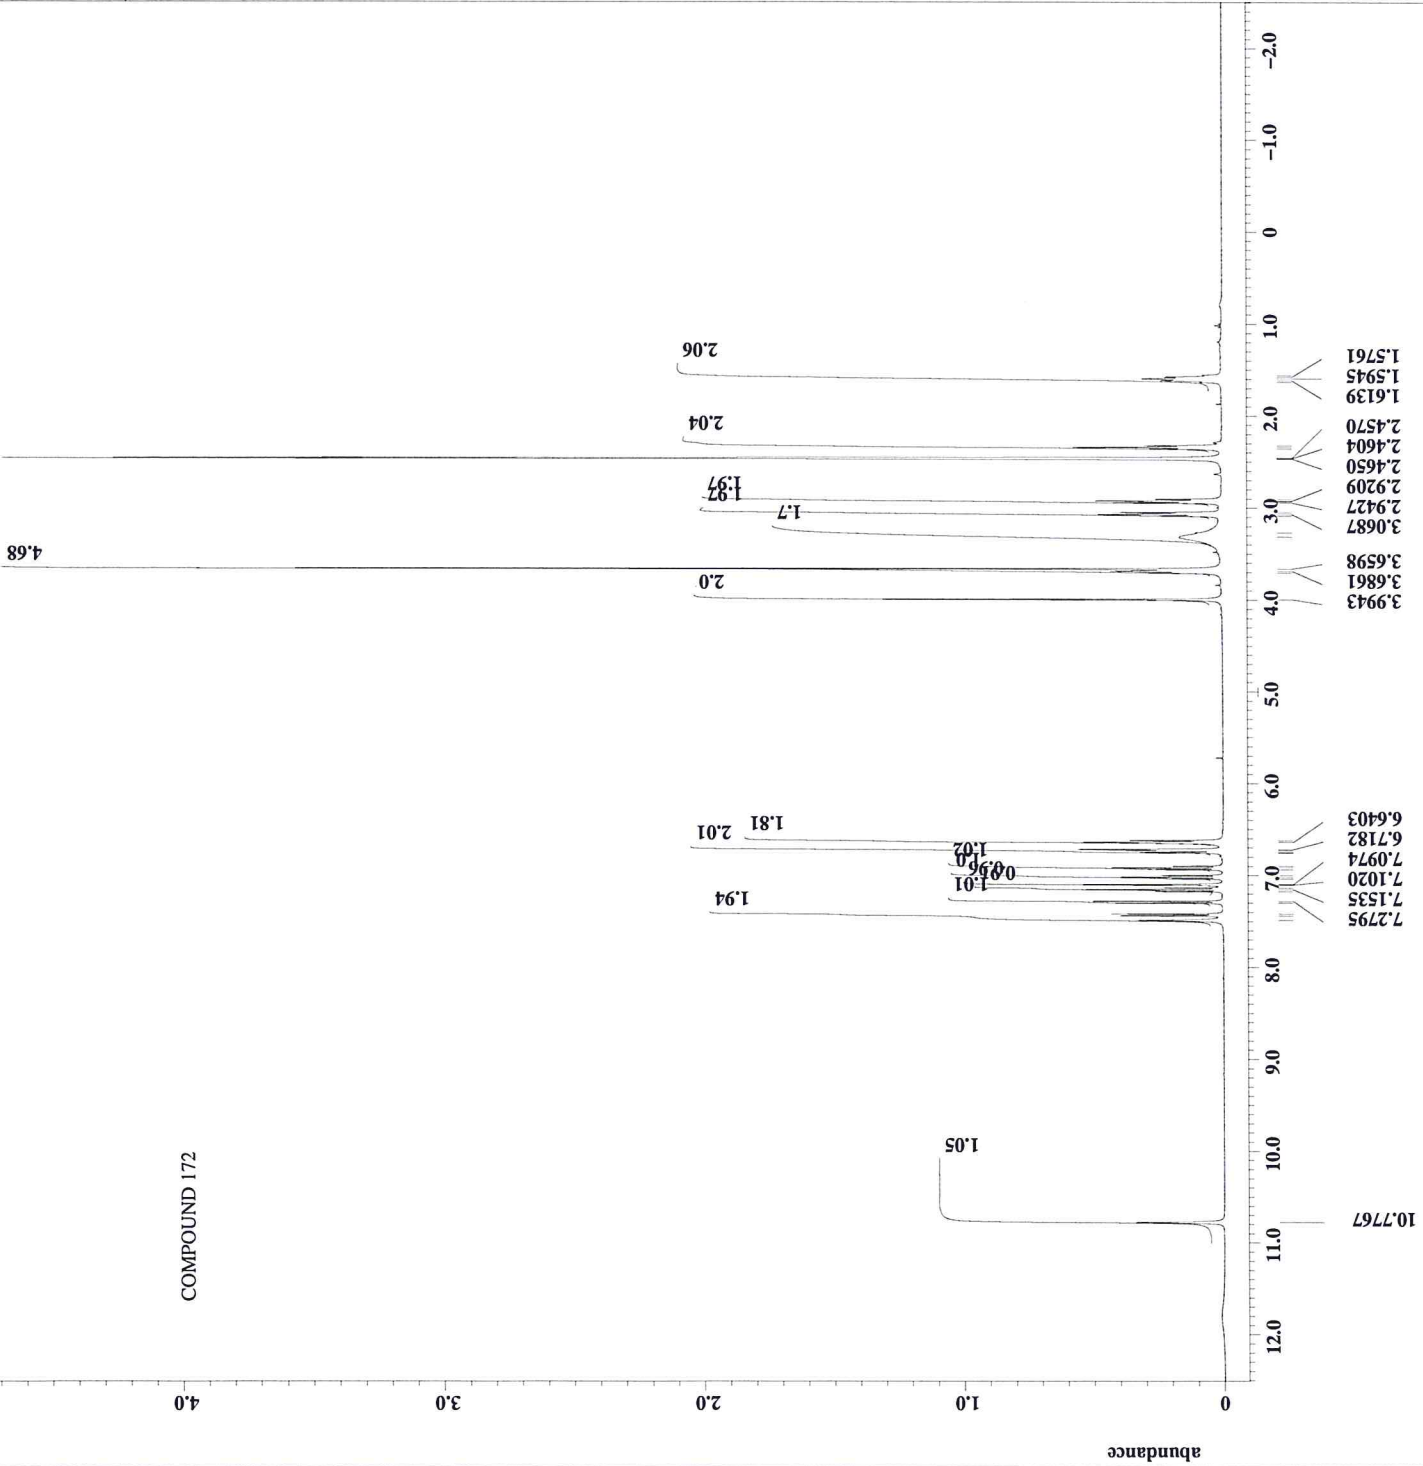

X : parts per Million : 1H



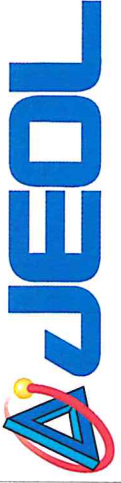

File name = BN-VI-61-C CARBON-4.j  
Author = Neumann  
Experiment = single\_pulse\_dec  
Sample\_id = BN-VI-61-C  
Solvent = DMSO-D6  
Creation\_time = 21-OCT-2015 13:03:14  
Revision\_time = 10-MAR-2021 11:41:20  
Current\_time = 10-MAR-2021 11:41:24  
Data\_format = 1D COMPLEX  
Dim\_size = 26214  
Dim\_title = 13C  
Dim\_units = [ppm]  
Dimensions = X  
Site = ECS 400  
Spectrometer = JNM-ECS400  
Field\_strength = 9.389766[T] (400 [MHz])  
X\_acq\_duration = 1.04333312[s]  
X\_domain = 13C  
X\_freq = 100.52530333 [MHz]  
X\_offset = 100 [ppm]  
X\_points = 32768  
X\_prescans = 4  
X\_resolution = 0.95846665 [Hz]  
X\_sweep = 31.40703518 [kHz]  
Irr\_domain = 1H  
Irr\_freq = 399.78219838 [MHz]  
Irr\_offset = FALSE  
Clipped = FALSE  
Mod\_return = 1  
Scans = 2048  
Total\_scans = 2048  
X\_90\_width = 13.12 [us]  
X\_acq\_time = 1.04333312 [s]  
X\_angle = 30 [deg]  
X\_atn = 9 [dB]  
X\_pulse = 4.37333333 [us]  
Irr\_atn\_dec = 27 [dB]  
Irr\_atn\_noe = 27 [dB]  
Irr\_noise = WALTZ  
Decoupling = TRUE  
Initial\_wait = 1 [s]  
Noe = TRUE  
Noe\_time = 3 [s]  
Recvr\_gain = 60  
Relaxation\_delay = 3 [s]  
Repetition\_time = 4.04333312 [s]  
Temp\_get = 20.5 [dC]

COMPOUND 172

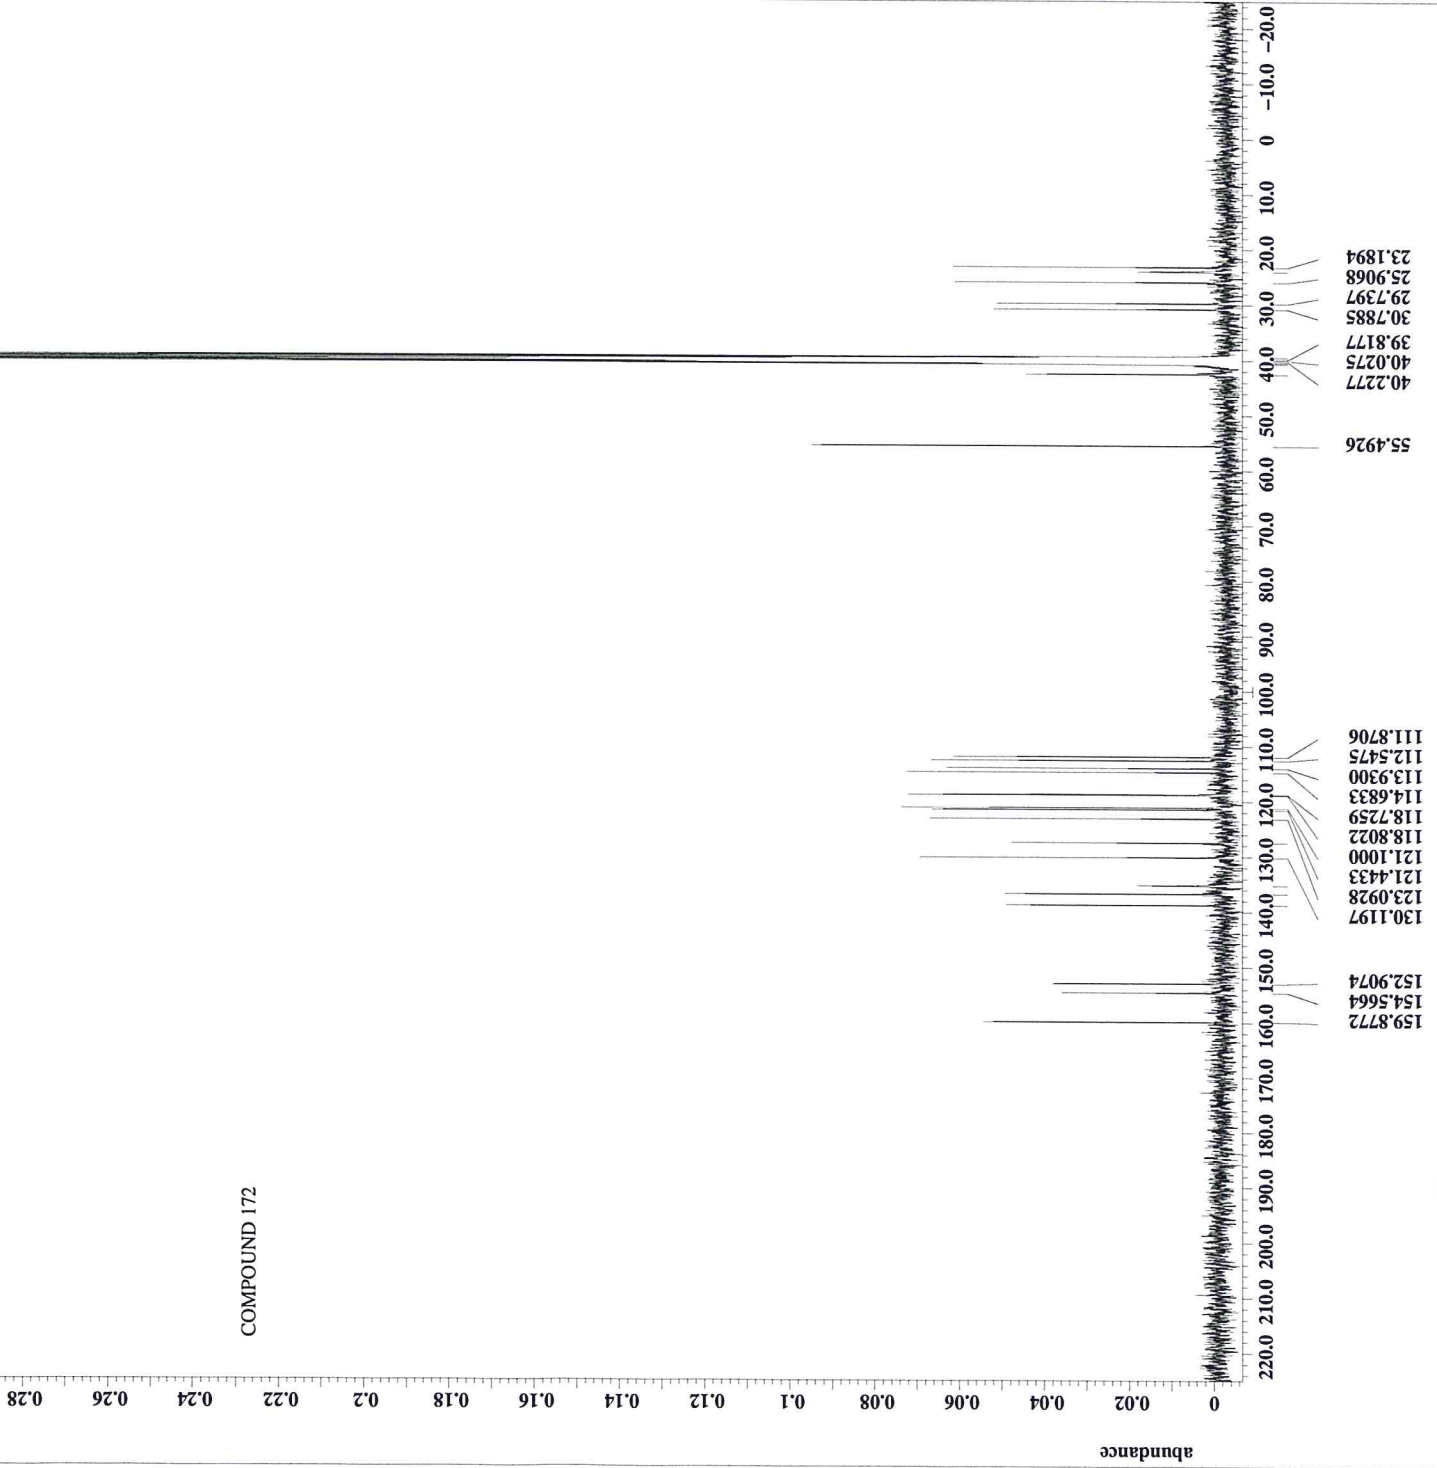

X : parts per Million : 13C

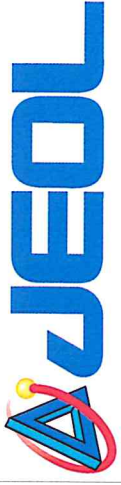

```

Filename = SM-I-29-F1-2_PROTON-6
Author = Deita
Experiment = single_pulse.ex2
Sample_id = SM-I-29-F1-2
Solvent = DMSO-D6
Creation_time = 14-MAY-2016 12:36:49
Revision_time = 17-MAR-2021 13:48:55
Current_time = 17-MAR-2021 13:49:02

Data_format = 1D COMPLEX
Dim_size = 13107
Dim_title = 1H
Dim_units = [ppm]
Dimensions = X
Site = ECS 400
Spectrometer = JNM-ECS400

Field_strength = 9.389766[T] (400 [MHz])
X_acq_duration = 2.18365952[s]
X_domain = 1H
X_freq = 399.78219838[MHz]
X_offset = 5[ppm]
X_points = 16384
X_prescans = 1
X_resolution = 0.45794685[Hz]
X_sweep = 7.5030012[kHz]
Irr_domain = 1H
Irr_freq = 399.78219838[MHz]
Irr_offset = 5[ppm]
Tri_domain = 1H
Tri_freq = 399.78219838[MHz]
Tri_offset = 5[ppm]
Clipped = FALSE
Mod_return = 1
Scans = 16
Total_scans = 16

X_90_width = 10.68[us]
X_acq_time = 2.18365952[s]
X_angle = 45[deg]
X_atn = 6[db]
X_pulse = 5.34[us]
Irr_mode = Off
Tri_mode = Off
Dante_preset = FALSE
Initial_wait = 1[s]
Recvr_gain = 40
Relaxation_delay = 4[s]
Repetition_time = 6.18365952[s]
Temp_get = 20.6[dc]
  
```

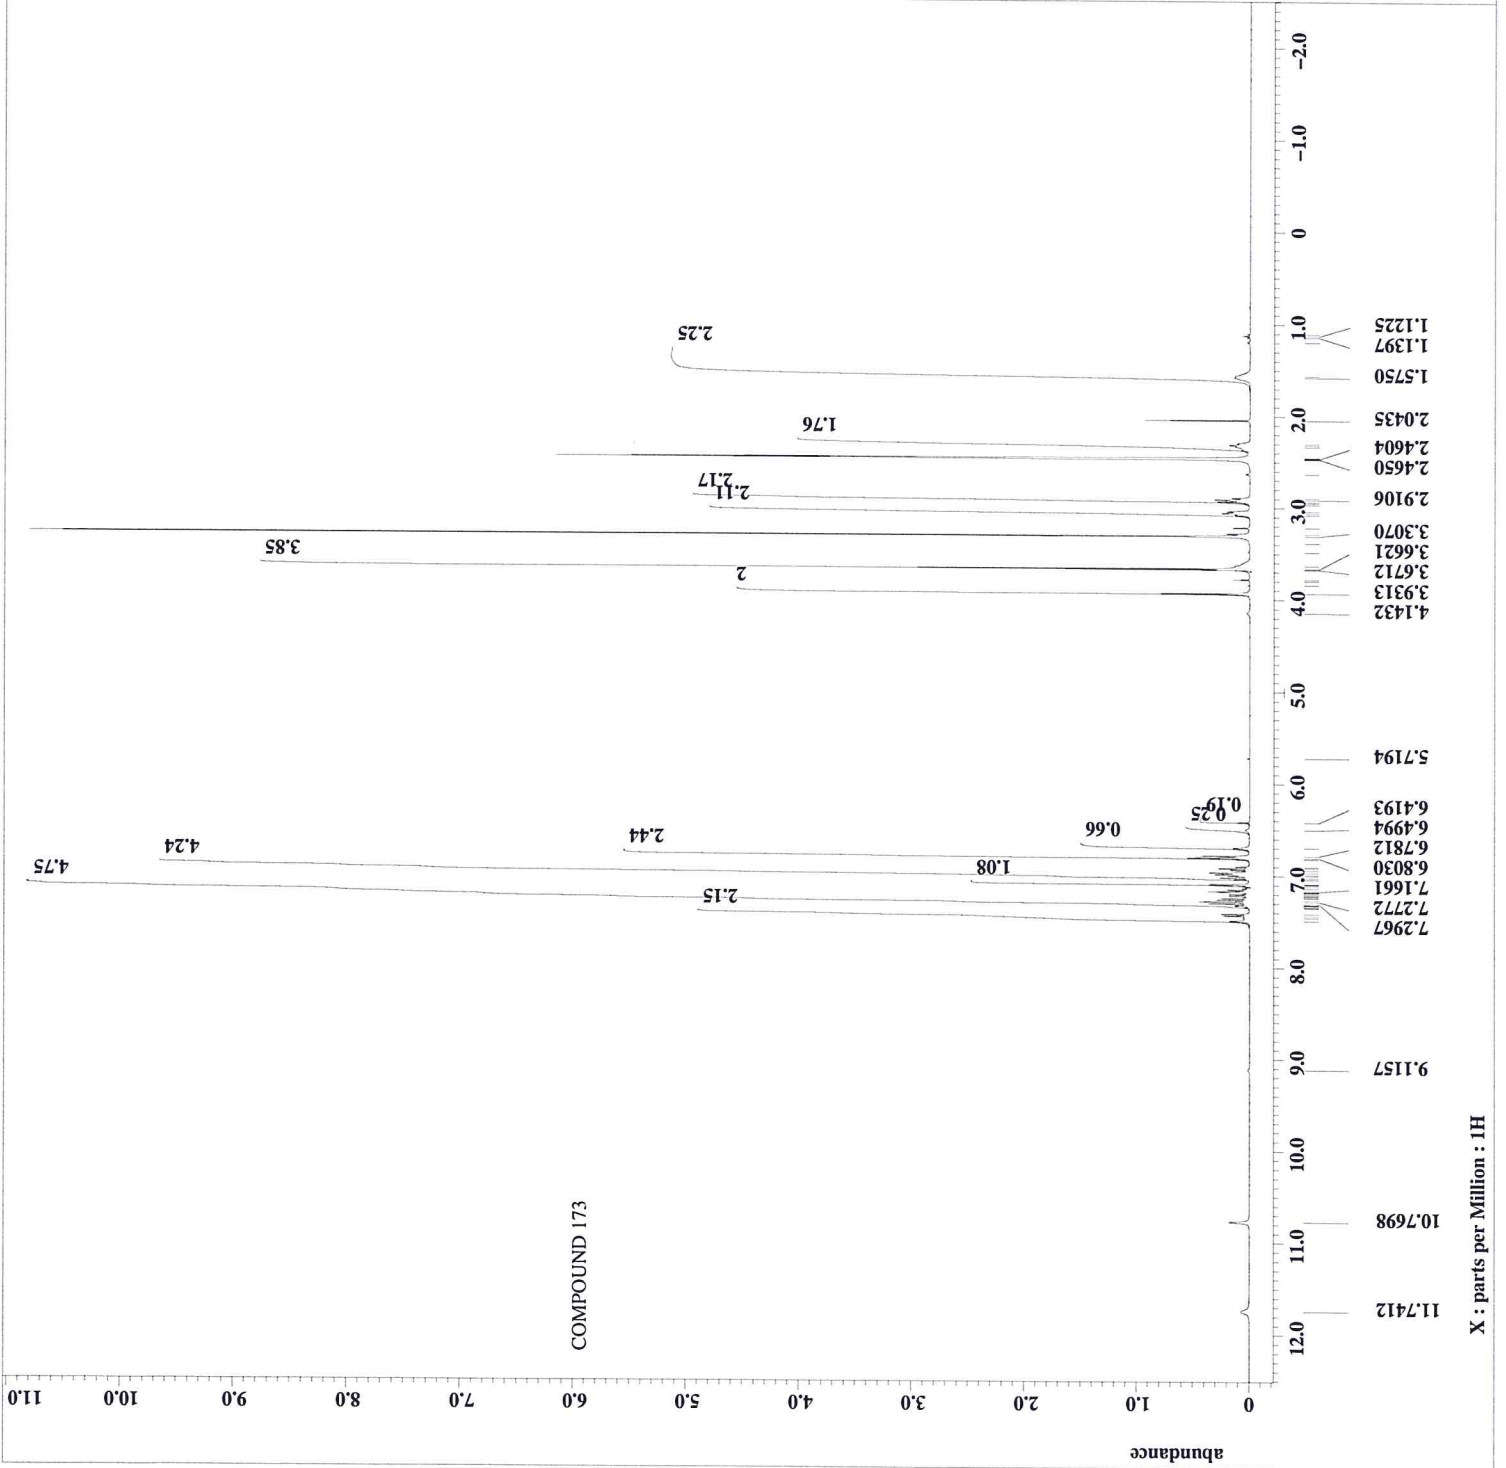

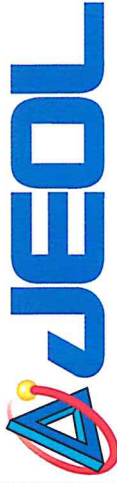

File name = SM-I-29-F1-2\_CARBON-6  
Author = Delta  
Experiment = single\_pulse\_dec  
Sample\_id = SM-I-29-F1-2  
Solvent = DMSO-D6  
Creation\_time = 15-MAY-2016 00:08:20  
Revision\_time = 10-MAR-2021 13:47:26  
Current\_time = 10-MAR-2021 13:47:31  
Data\_format = 1D COMPLEX  
Dim\_size = 26214  
Dim\_title = 13C  
Dim\_units = [ppm]  
Dimensions = X  
Site = ECS 400  
Spectrometer = JNM-ECS400  
Field\_strength = 9.389766[T] (400[MHz])  
X\_acq\_duration = 1.04333312[s]  
X\_domain = 13C  
X\_freq = 100.52530333[MHz]  
X\_offset = 100[ppm]  
X\_points = 32768  
X\_prescans = 4  
X\_resolution = 0.95846665[Hz]  
X\_sweep = 31.40703518[MHz]  
Irr\_domain = 1H  
Irr\_freq = 399.78219838[MHz]  
Irr\_offset = 5[ppm]  
Clipped = FALSE  
Mod\_return = 1  
Scans = 10240  
Total\_scans = 10240  
X\_90\_width = 12.84[us]  
X\_acq\_time = 1.04333312[s]  
X\_angle = 30[deg]  
X\_atn = 9[db]  
X\_pulse = 4.28[us]  
Irr\_atn\_dec = 27[db]  
Irr\_atn\_noe = 27[db]  
Irr\_noise = WALTZ  
Decoupling = TRUE  
Initial\_wait = 1[s]  
Noe = TRUE  
Noe\_time = 3[s]  
Recvr\_gain = 60  
Relaxation\_delay = 3[s]  
Repetition\_time = 4.04333312[s]  
Temp\_get = 19.9[degC]

COMPOUND 173

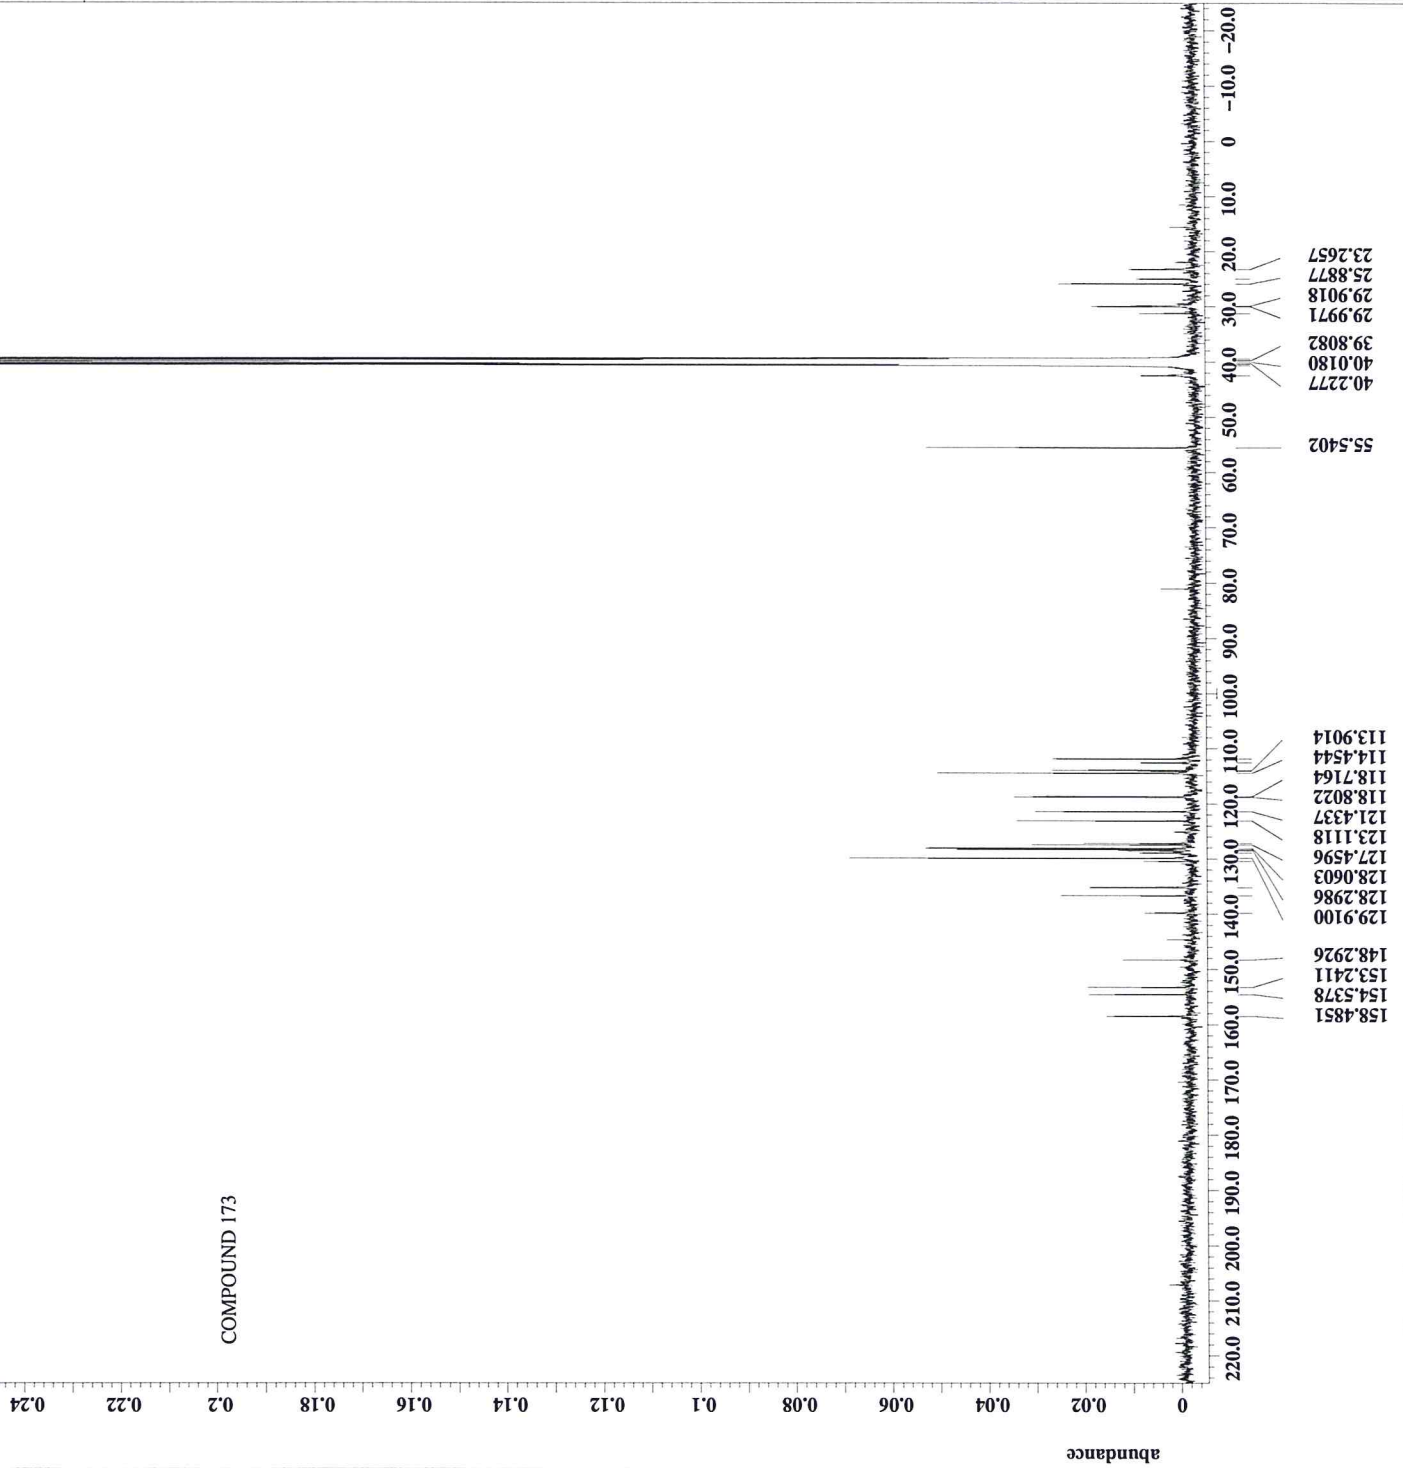

X : parts per Million : 13C

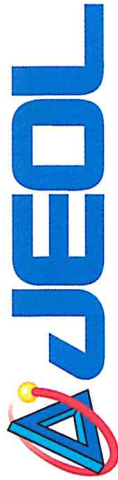

File: MM-I-36\_PROTON-4.jdf  
Author: Delta  
Experiment: single\_pulse.ex2  
Sample\_id: MM-I-36  
Solvent: METHANOL-D3  
Creation\_time: 6-JUL-2016 09:50:38  
Revision\_time: 11-MAR-2021 10:04:13  
Current\_time: 11-MAR-2021 10:04:17

Data\_format: 1D COMPLEX  
Dim\_size: 13107  
Dim\_title: 1H  
Dim\_units: [ppm]  
Dimensions: X  
Site: ECS 400  
Spectrometer: JNM-ECS400

Field\_strength: 9.389766 [T] (400 [MHz])  
X\_acq\_duration: 2.18365952 [s]  
X\_domain: 1H  
X\_freq: 399.78219838 [MHz]  
X\_offset: 5 [ppm]  
X\_points: 16384  
X\_prescans: 1  
X\_resolution: 0.45794685 [Hz]  
X\_sweep: 7.5030012 [kHz]  
Irr\_domain: 1H  
Irr\_freq: 399.78219838 [MHz]  
Irr\_offset: 5 [ppm]  
Tri\_domain: 1H  
Tri\_freq: 399.78219838 [MHz]  
Tri\_offset: 5 [ppm]  
Clipped: FALSE  
Mod\_return: 1  
Scans: 16  
Total\_scans: 16

X\_90\_width: 10.68 [us]  
X\_acq\_time: 2.18365952 [s]  
X\_angle: 45 [deg]  
X\_atn: 6 [dB]  
X\_pulse: 5.34 [us]  
Irr\_mode: Off  
Tri\_mode: Off  
Dante\_presat: FALSE  
Initial\_wait: 1 [s]  
Recvr\_gain: 44  
Relaxation\_delay: 4 [s]  
Repetition\_time: 6.18365952 [s]  
Temp\_get: 20.8 [dC]

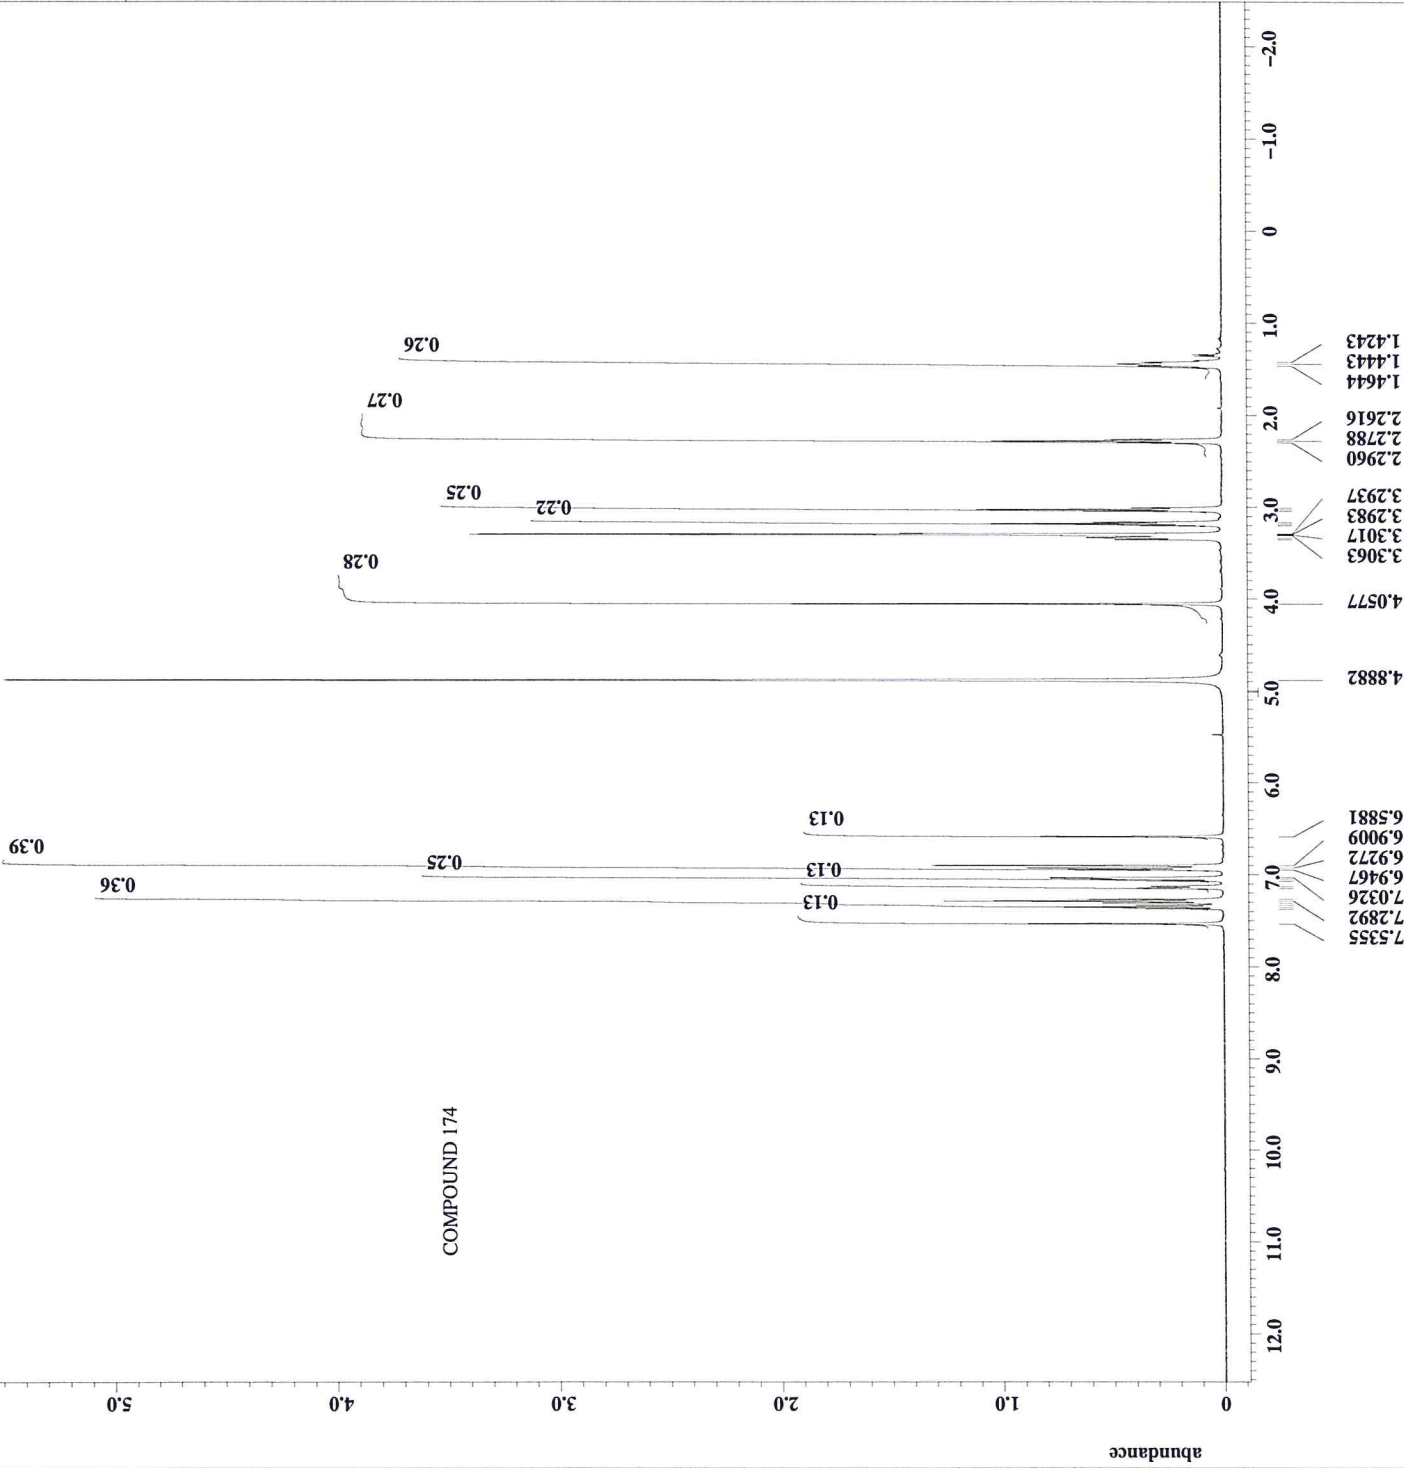

X : parts per Million : 1H



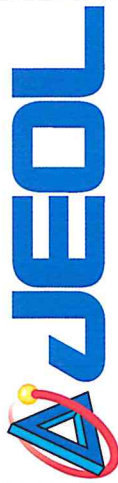

Filename = MM-I-36\_CARBON-5.jdf  
Author = Delta  
Experiment = single\_pulse\_dec  
Sample\_id = MM-I-36  
Solvent = METHANOL-D3  
Creation time = 7-JUL-2016 08:51:17  
Revision time = 11-MAR-2021 10:06:30  
Current\_time = 11-MAR-2021 10:06:34

Data\_format = 1D COMPLEX  
Dim\_size = 26214  
Dim\_title = 13C  
Dim\_units = [ppm]  
Dimensions = X  
Site = ECS 400  
Spectrometer = JNM-ECS400

Field\_strength = 9.389766[T] (400 [MHz])  
X\_acq\_duration = 1.04333312[s]  
X\_domain = 13C  
X\_freq = 100.52530333 [MHz]  
X\_offset = 100 [ppm]  
X\_points = 32768  
X\_prescans = 4  
X\_resolution = 0.95846665 [Hz]  
X\_sweep = 31.40703518 [kHz]  
Irr\_domain = 1H  
Irr\_freq = 399.78219838 [MHz]  
Irr\_offset = 5 [ppm]  
Clipped = FALSE  
Mod\_return = 1  
Scans = 14203.0  
Total\_scans = 14203.0

X\_90\_width = 12.84 [us]  
X\_acq\_time = 1.04333312 [s]  
X\_angle = 30 [deg]  
X\_atn = 9 [dB]  
X\_pulse = 4.28 [us]  
Irr\_atn\_dec = 27 [dB]  
Irr\_atn\_noe = 27 [dB]  
Irr\_noise = WALTZ  
Decoupling = TRUE  
Initial\_wait = 1 [s]  
Noe = TRUE  
Noe\_time = 3 [s]  
Recvr\_gain = 60  
Relaxation\_delay = 3 [s]  
Repetition\_time = 4.04333312 [s]  
Temp\_get = 20.5 [dC]

COMPOUND 174

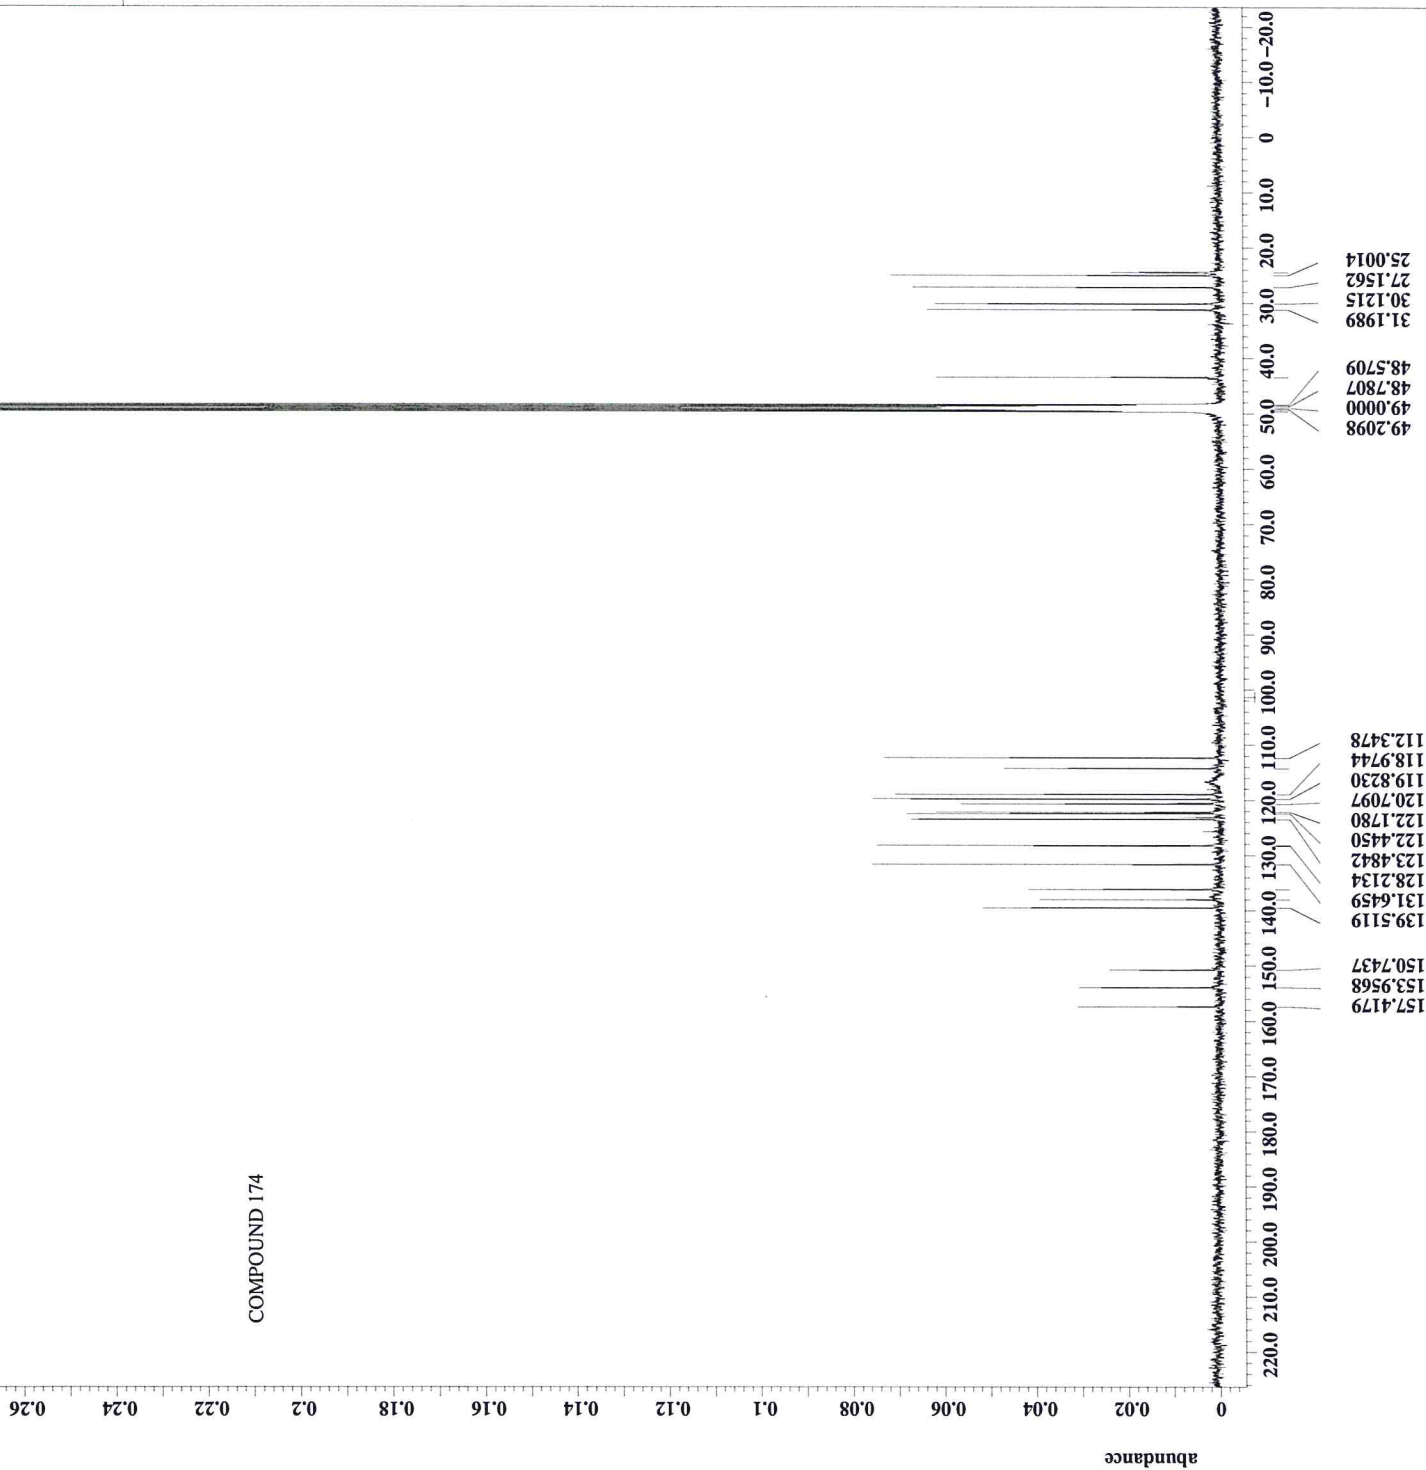

X : parts per Million : 13C

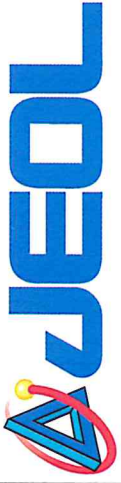

```

= MM-I-53_PROTON-5.jdf
= Delta
= single_pulse.ex2
= MM-I-53
= METHANOL-D3
= 5-AUG-2016 17:53:53
= 17-MAR-2021 14:23:27
= 17-MAR-2021 14:23:30

Data_format = 1D COMPLEX
Dim_size = 13107
Dim_title = 1H
Dim_units = [ppm]
Dimensions = X
Site = ECS 400
Spectrometer = JNM-ECS400

Field_strength = 9.389766[T] (400 [MHz])
X_acq_duration = 2.18365952[s]
X_domain = 1H
X_freq = 399.78219838 [MHz]
X_offset = 5 [ppm]
X_points = 16384
X_prescans = 1
X_resolution = 0.45794685 [Hz]
X_sweep = 7.5030012 [kHz]
Irr_domain = 1H
Irr_freq = 399.78219838 [MHz]
Irr_offset = 5 [ppm]
Tri_domain = 1H
Tri_freq = 399.78219838 [MHz]
Tri_offset = 5 [ppm]
Clipped = FALSE
Mod_return = 1
Scans = 16
Total_scans = 16

X_90_width = 10.68 [us]
X_acq_time = 2.18365952 [s]
X_angle = 45 [deg]
X_atn = 6 [dB]
X_pulse = 5.34 [us]
Irr_mode = Off
Tri_mode = Off
Dante_preset = FALSE
Initial_wait = 1 [s]
Recvr_gain = 42
Relaxation_delay = 4 [s]
Repetition_time = 6.18365952 [s]
Temp_get = 20.4 [dC]
  
```

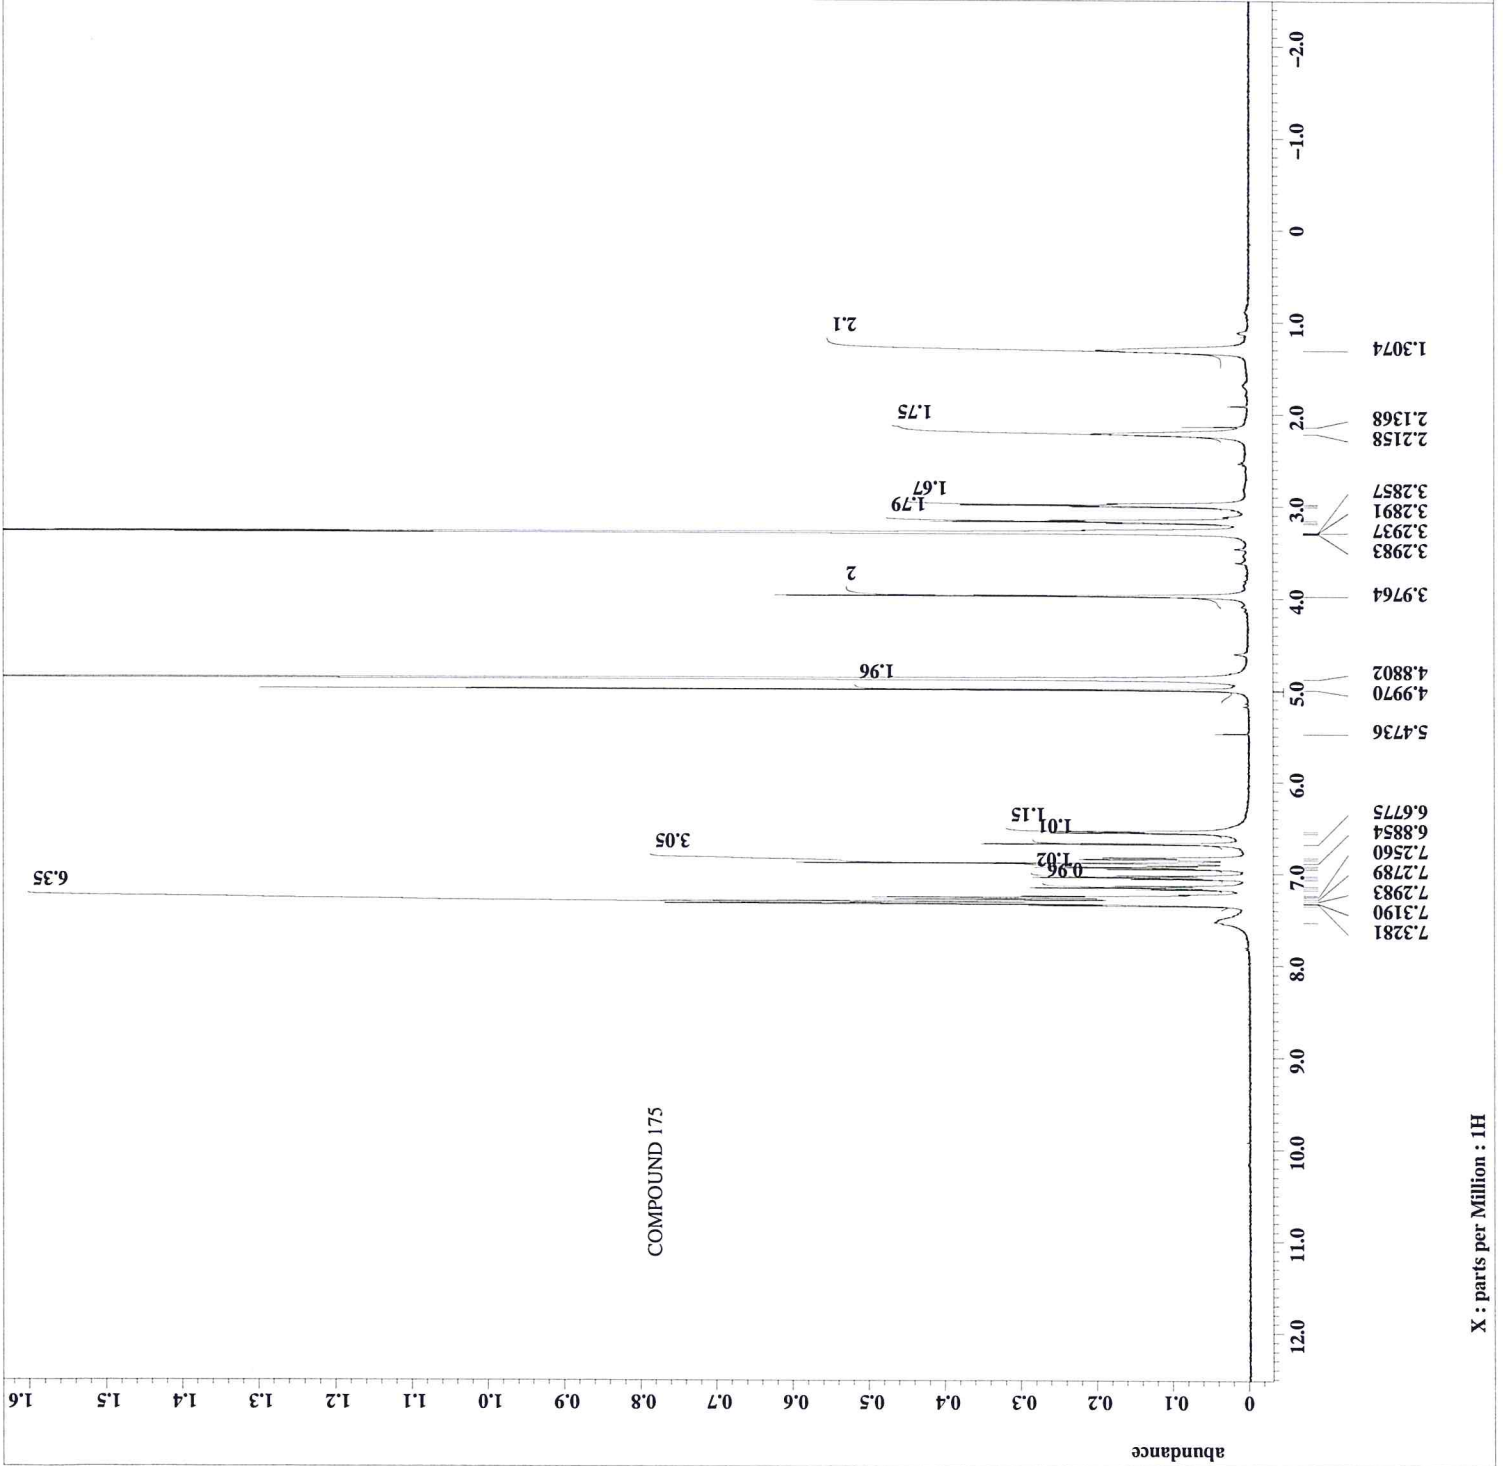

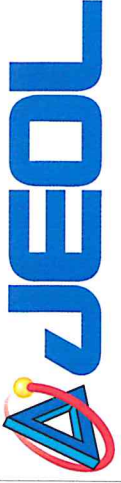

Filename = MM-I-53\_CARBON-5.jdf  
Author = Delta  
Experiment = single\_pulse\_dec  
Sample\_id = MM-I-53  
Solvent = METHANOL-D3  
Creation\_time = 8-AUG-2016 07:20:49  
Revision\_time = 11-MAR-2021 10:19:20  
Current\_time = 11-MAR-2021 10:19:25  
Data\_format = 1D COMPLEX  
Dim\_size = 26214  
Dim\_title = 13C  
Dim\_units = [ppm]  
Dimensions = X  
Site = ECS 400  
Spectrometer = JNM-ECS400  
Field\_strength = 9.389766[T] (400 [MHz])  
X\_acq\_duration = 1.0433312[s]  
X\_domain = 13C  
X\_freq = 100.52530333 [MHz]  
X\_offset = 100 [ppm]  
X\_points = 32768  
X\_prescans = 4  
X\_resolution = 0.95846665 [Hz]  
X\_sweep = 31.40703518 [kHz]  
Irr\_domain = 1H  
Irr\_freq = 399.78219838 [MHz]  
Irr\_offset = 5 [ppm]  
Clipped = TRUE  
Mod\_return = 1  
Scans = 54685  
Total\_scans = 54685  
X\_90\_width = 12.84 [us]  
X\_acq\_time = 1.0433312 [s]  
X\_angle = 30 [deg]  
X\_atn = 9 [dB]  
X\_pulse = 4.28 [us]  
Irr\_atn\_dec = 27 [dB]  
Irr\_atn\_noise = 27 [dB]  
Irr\_noise = WALTZ  
Decoupling = TRUE  
Initial\_wait = 1 [s]  
Noe = TRUE  
Noe\_time = 3 [s]  
Recvr\_gain = 60  
Relaxation\_delay = 3 [s]  
Repetition\_time = 4.0433312 [s]  
Temp\_get = 20.5 [dc]

COMPOUND 175

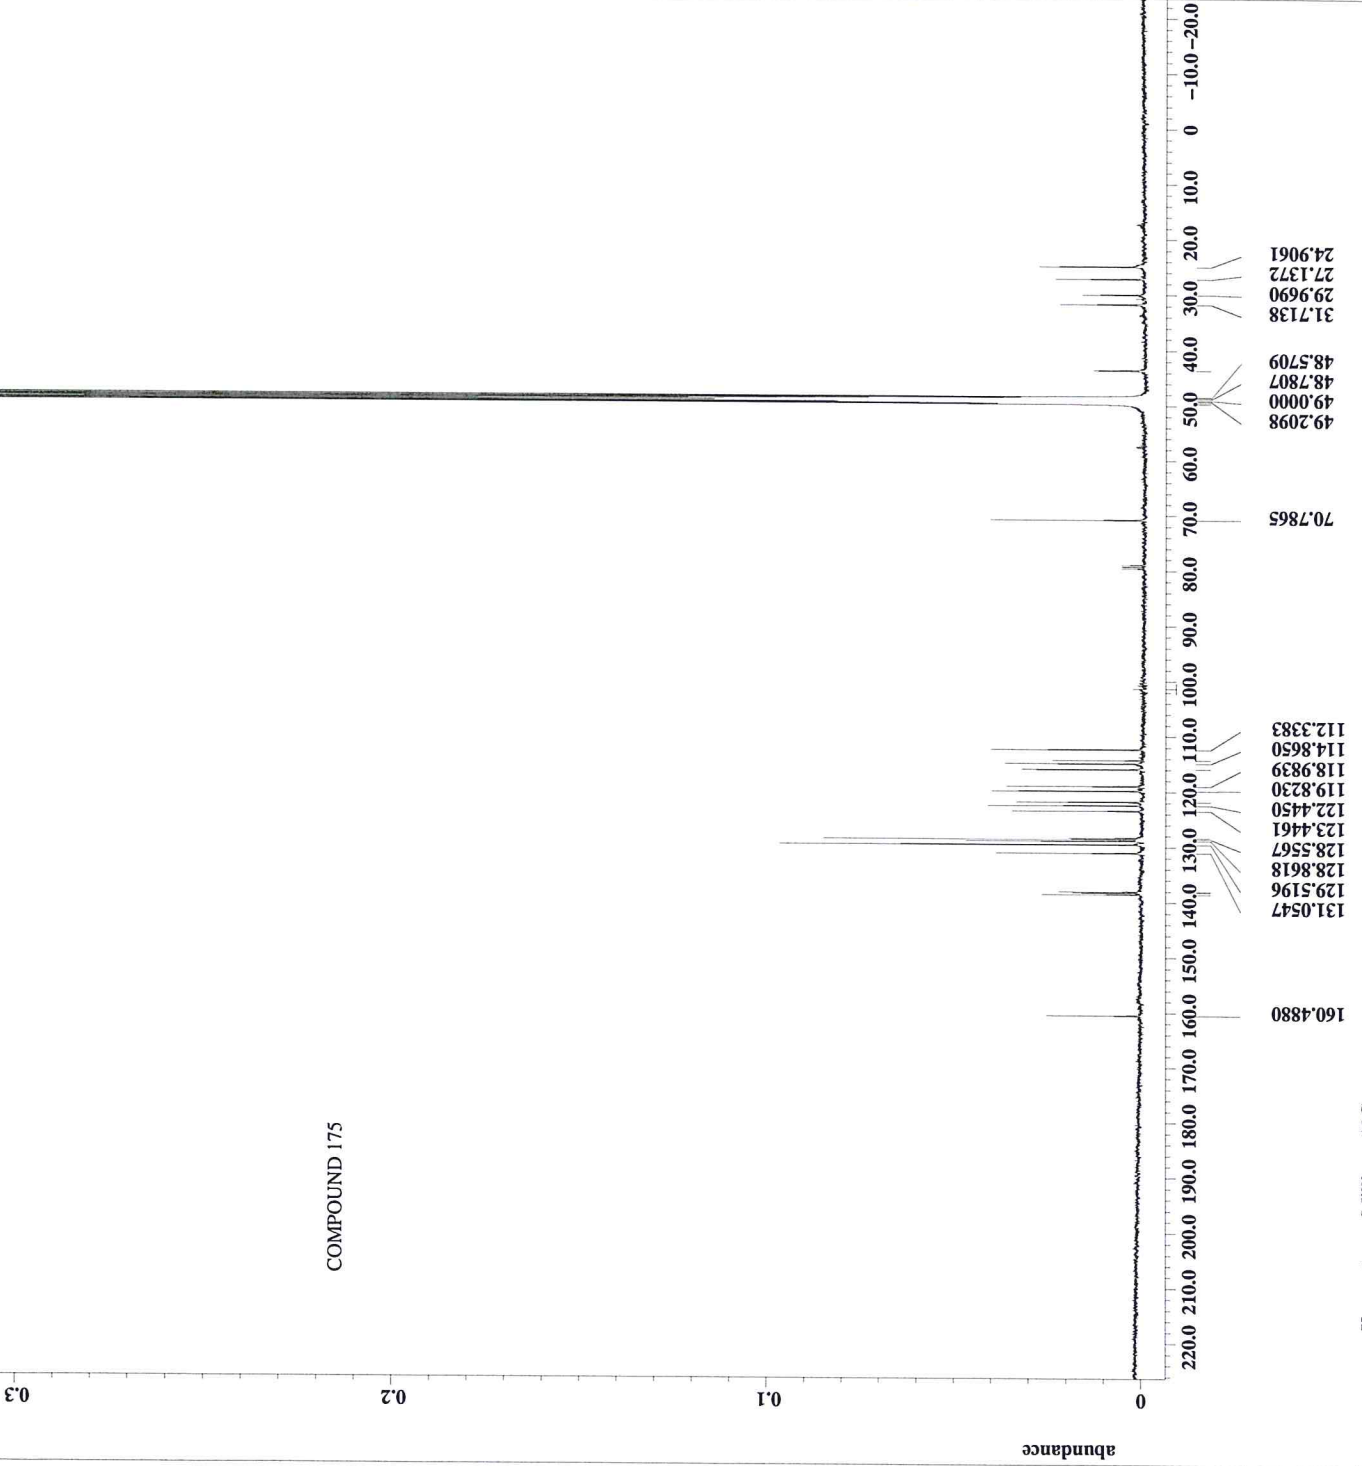

X : parts per Million : 13C

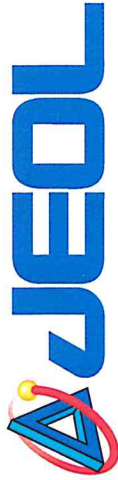

File name = SM-I-92-c\_PROTON-4.jd  
Author = Delta  
Experiment = single\_pulse.ex2  
Sample\_id = SM-I-92-c  
Solvent = METHANOL-D3  
Creation time = 16-AUG-2016 16:19:57  
Revision time = 11-MAR-2021 09:50:01  
Current time = 11-MAR-2021 09:50:06

Data format = 1D COMPLEX  
Dim\_size = 13107  
Dim\_title = 1H  
Dim\_units = [ppm]  
Dimensions = X  
Site = ECS 400  
Spectrometer = JNM-ECS400

Field strength = 9.389766[T] (400[MHz])  
X\_acq\_duration = 2.18365952[s]  
X\_domain = 1H  
X\_freq = 399.78219838[MHz]  
X\_offset = 5[ppm]  
X\_points = 16384  
X\_prescans = 1  
X\_resolution = 0.45794685[Hz]  
X\_sweep = 7.5030012[kHz]  
Irr\_domain = 1H  
Irr\_freq = 399.78219838[MHz]  
Irr\_offset = 5[ppm]  
Tri\_domain = 1H  
Tri\_freq = 399.78219838[MHz]  
Tri\_offset = 5[ppm]  
Clipped = FALSE  
Mod\_return = 1  
Scans = 16  
Total\_scans = 16

X\_90\_width = 10.68[us]  
X\_acq\_time = 2.18365952[s]  
X\_angle = 45[deg]  
X\_atn = 6[db]  
X\_pulse = 5.34[us]  
Irr\_mode = Off  
Tri\_mode = Off  
Dante\_presat = FALSE  
Initial\_wait = 1[s]  
Recvr\_gain = 42  
Relaxation\_delay = 4[s]  
Repetition\_time = 6.18365952[s]  
Temp\_get = 19.9[degC]

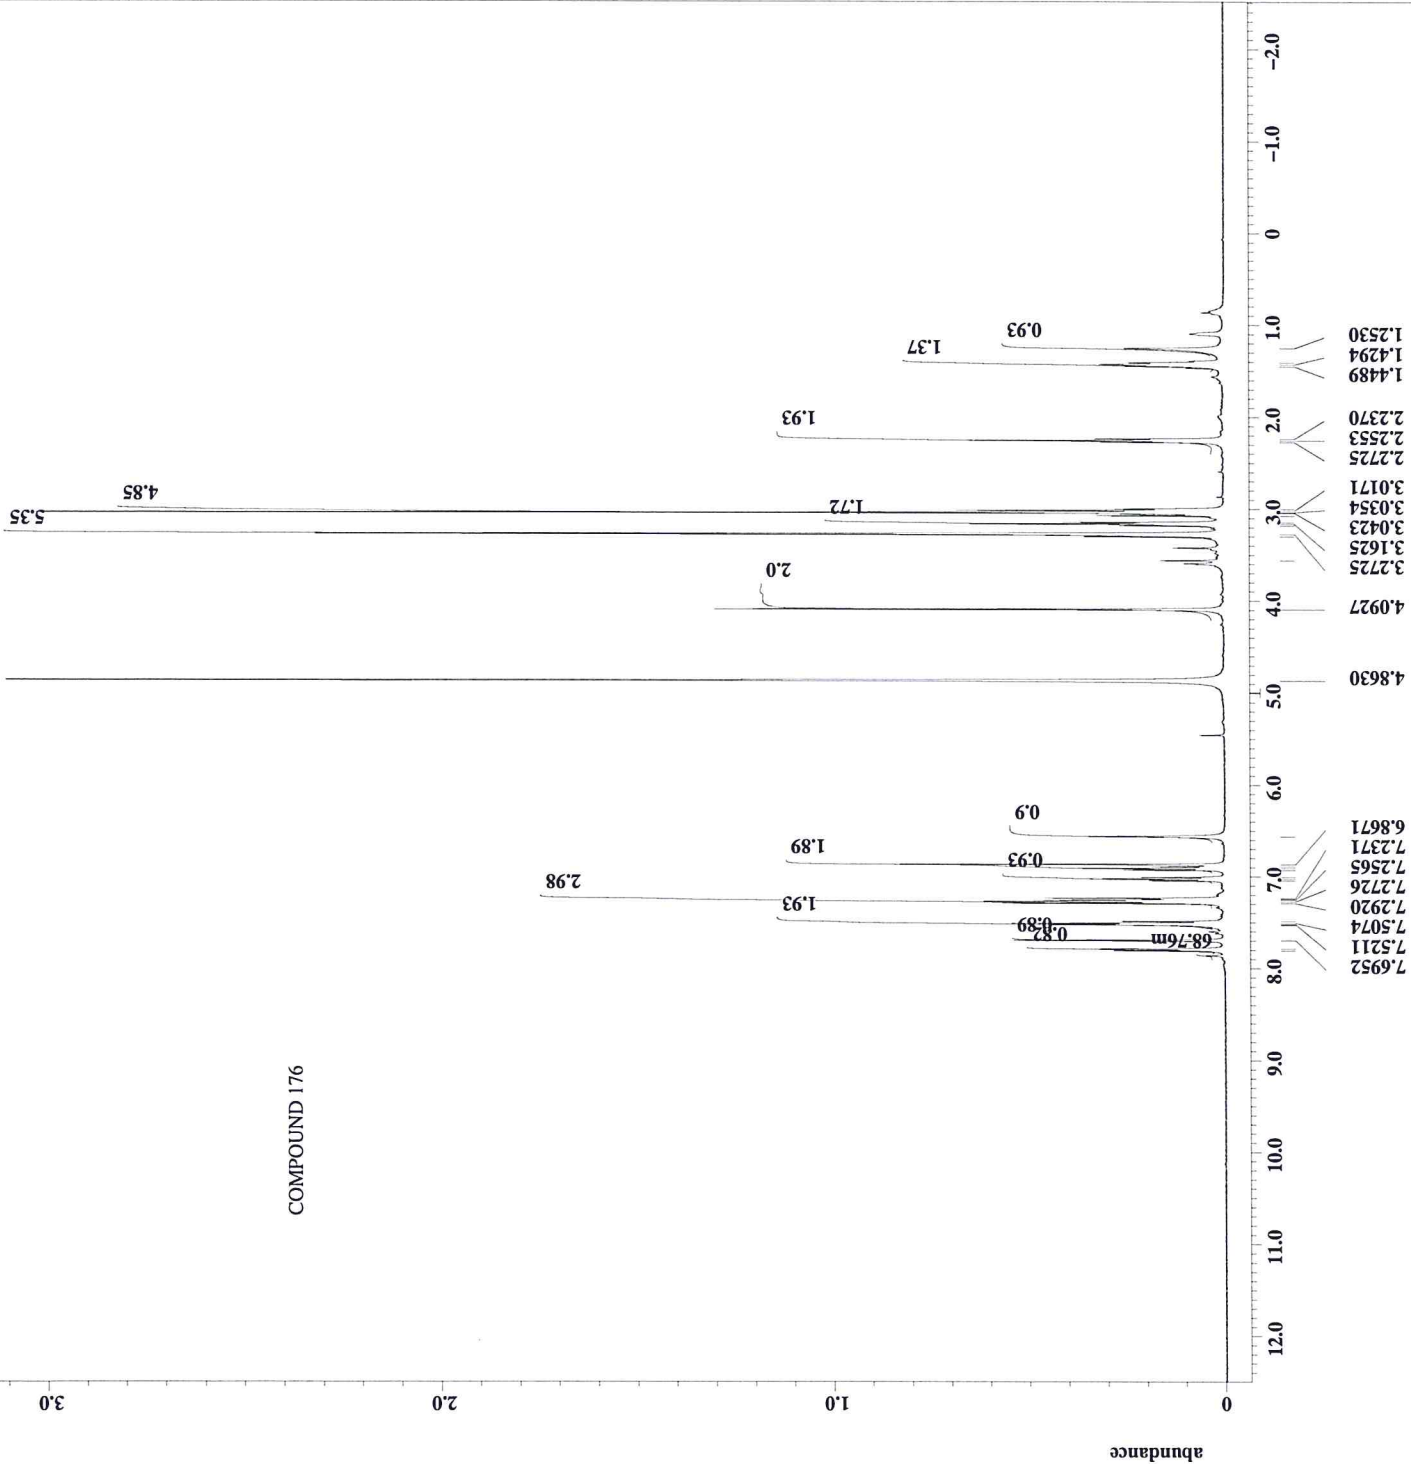

X : parts per Million : 1H



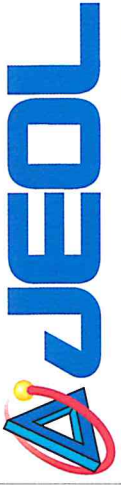

Filename = SW-I-92-C\_CARBON-5.jd  
Author = Delta  
Experiment = single\_pulse\_dec  
Sample\_id = SM-I-92-C  
Solvent = METHANOL-D3  
Creation\_time = 17-AUG-2016 08:16:30  
Revision\_time = 11-MAR-2021 09:52:01  
Current\_time = 11-MAR-2021 09:52:05  
Data\_format = 1D COMPLEX  
Dim\_size = 26214  
Dim\_title = 13C  
Dim\_units = [ppm]  
Dimensions = X  
Site = ECS 400  
Spectrometer = JNM-ECS400  
Field\_strength = 9.389766[T] (400[MHz])  
X\_acq\_duration = 1.04333312[s]  
X\_domain = 13C  
X\_freq = 100.52530333[MHz]  
X\_offset = 100[ppm]  
X\_points = 32768  
X\_prescans = 4  
X\_resolution = 0.95846665[Hz]  
X\_sweep = 31.40703518[kHz]  
Irr\_domain = 1H  
Irr\_freq = 399.78219838[MHz]  
Irr\_offset = 5[ppm]  
Clipped = FALSE  
Mod\_return = 1  
Scans = 14145  
Total\_scans = 14145  
X\_90\_width = 12.84[us]  
X\_acq\_time = 1.04333312[s]  
X\_angle = 30[deg]  
X\_atn = 9[db]  
X\_pulse = 4.28[us]  
Irr\_atn\_dec = 27[db]  
Irr\_atn\_noe = 27[db]  
Irr\_noise = WALTZ  
Decoupling = TRUE  
Initial\_wait = 1[s]  
Noe = TRUE  
Noe\_time = 3[s]  
Recvr\_gain = 60  
Relaxation\_delay = 3[s]  
Repetition\_time = 4.04333312[s]  
Temp\_get = 20[dc]

COMPOUND 176

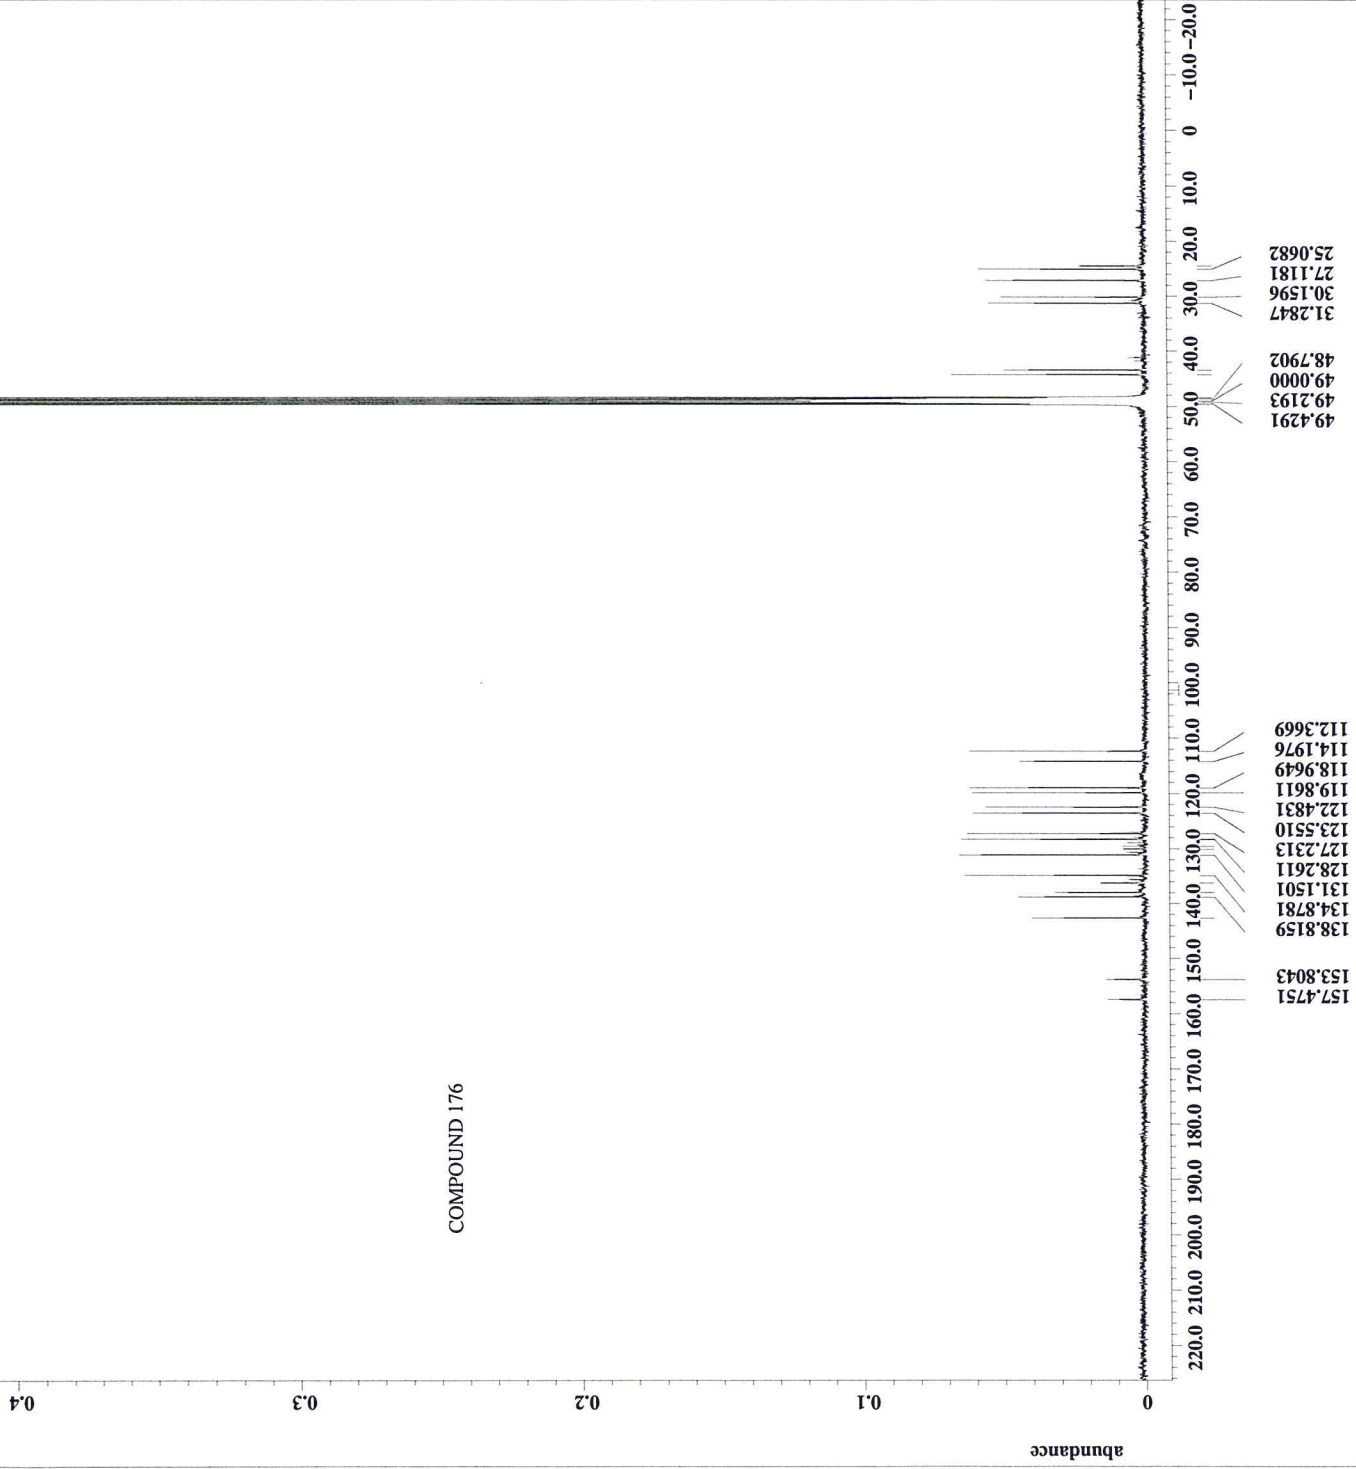

X : parts per Million : 13C

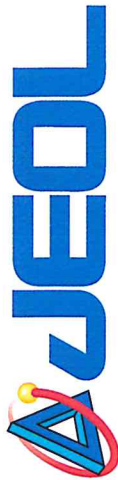

Filename = MM-I-26-F1\_PROTON-4.j  
Author = Delta  
Experiment = single\_pulse.ex2  
Sample\_id = MM-I-26-F1  
Solvent = METHANOL-D3  
Creation\_time = 17-JUN-2016 09:09:08  
Revision\_time = 11-MAR-2021 10:40:06  
Current\_time = 11-MAR-2021 10:40:14

Data\_format = 1D COMPLEX  
Dim\_size = 13107  
Dim\_title = 1H  
Dim\_units = [ppm]  
Dimensions = X 400  
Site = ECS 400  
Spectrometer = JNM-ECS400

Field\_strength = 9.389766[T] (400 [MHz])  
X\_acq\_duration = 2.18365952[s]  
X\_domain = 1H  
X\_freq = 399.78219838 [MHz]  
X\_offset = 5 [ppm]  
X\_points = 16384  
X\_prescans = 1  
X\_resolution = 0.45794685 [Hz]  
X\_sweep = 7.5030012 [kHz]  
Irr\_domain = 1H  
Irr\_freq = 399.78219838 [MHz]  
Irr\_offset = 5 [ppm]  
Tri\_domain = 1H  
Tri\_freq = 399.78219838 [MHz]  
Tri\_offset = 5 [ppm]  
Clipped = FALSE  
Mod\_return = 1  
Scans = 16  
Total\_scans = 16

X\_90\_width = 10.68 [us]  
X\_acq\_time = 2.18365952 [s]  
X\_angle = 45 [deg]  
X\_atn = 6 [dB]  
X\_pulse = 5.34 [us]  
Irr\_mode = Off  
Tri\_mode = Off  
Dante\_preset = FALSE  
Initial\_wait = 1 [s]  
Recvr\_gain = 40  
Relaxation\_delay = 4 [s]  
Repetition\_time = 6.18365952 [s]  
Temp\_get = 20 [dC]

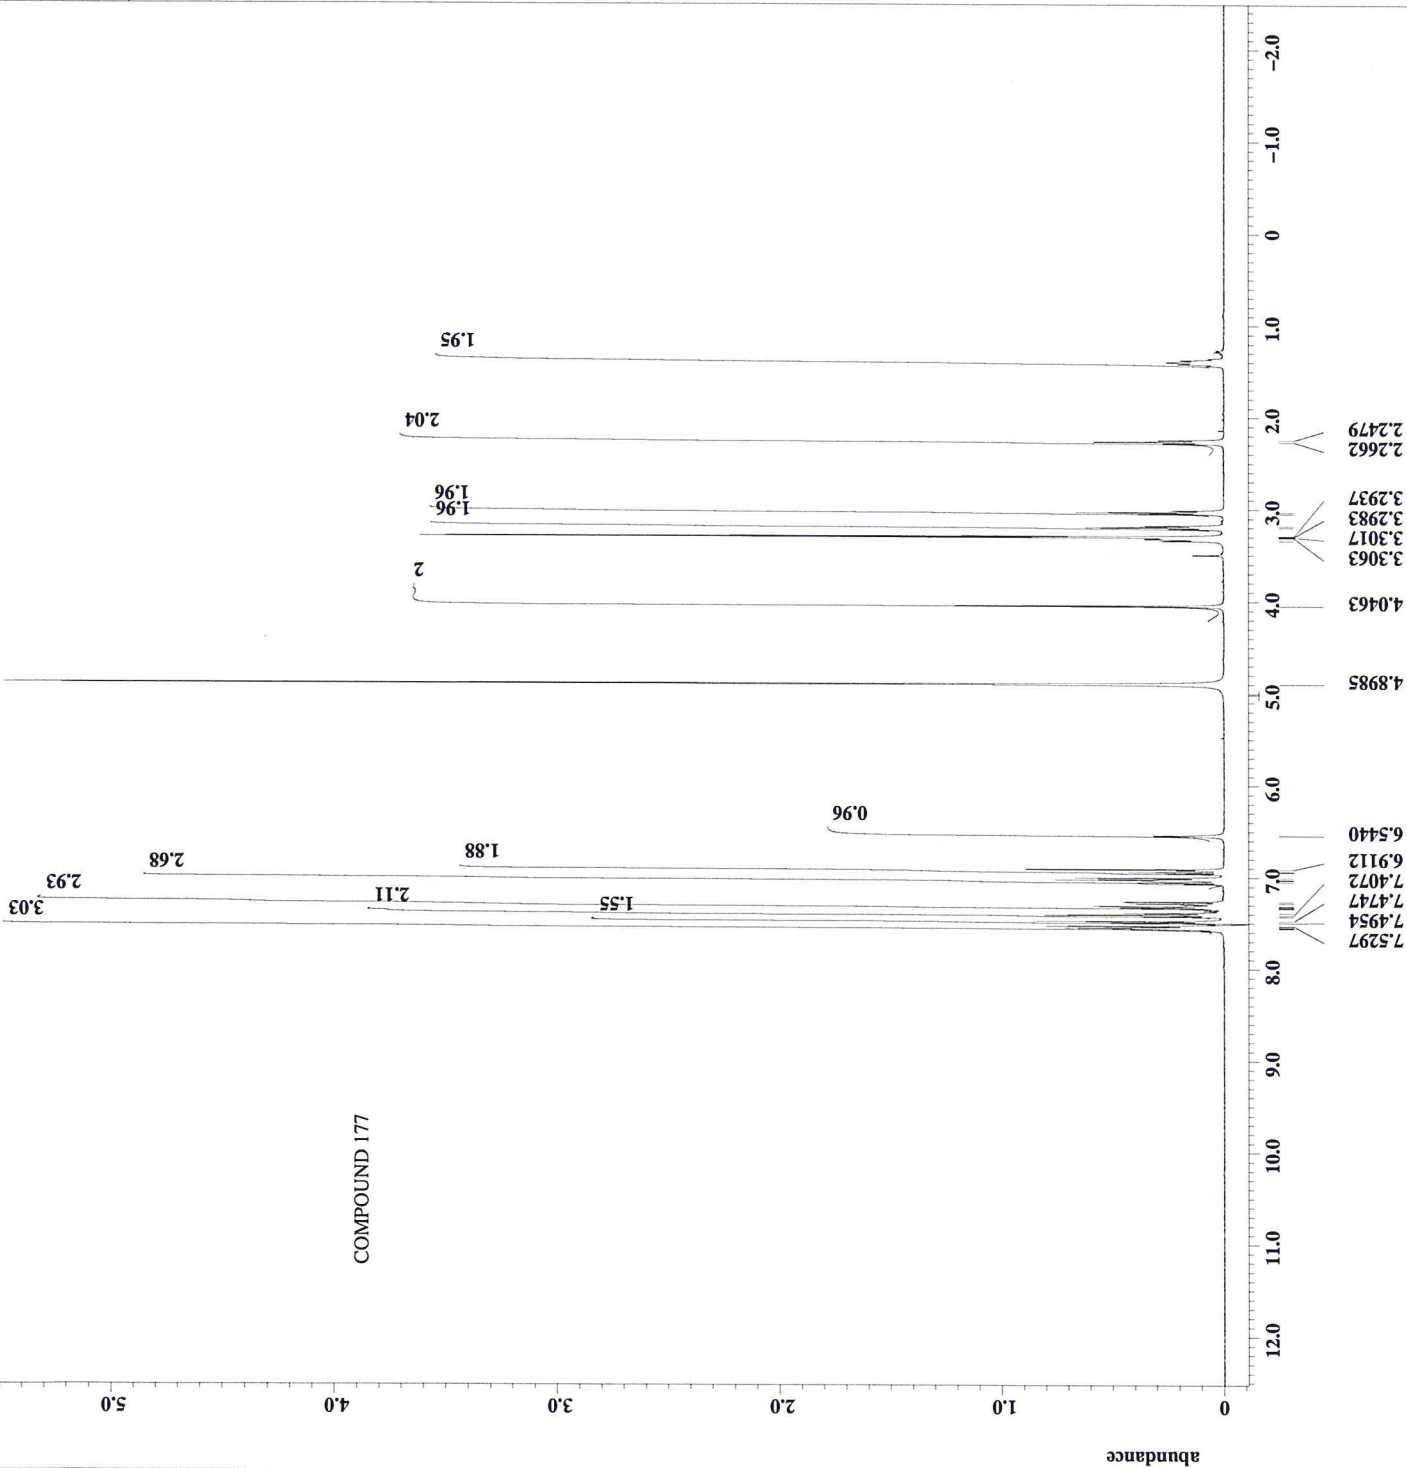

X : parts per Million : 1H

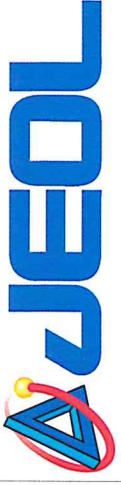

Filename = MM-I-26-F1\_CARBON-5.J  
Author = Delta  
Experiment = single\_pulse\_dec  
Sample\_id = MM-I-26-F1  
Solvent = METHANOL-D3  
Creation\_time = 18-JUN-2016 10:42:23  
Revision\_time = 11-MAR-2021 10:41:55  
Current\_time = 11-MAR-2021 10:42:00  
Data\_format = 1D COMPLEX  
Dim\_size = 26214  
Dim\_title = 13C  
Dim\_units = [ppm]  
Dimensions = X  
Site = ECS 400  
Spectrometer = JNM-ECS400  
Field\_strength = 9.389766[T] (400 [MHz])  
X\_acq\_duration = 1.04333312[s]  
X\_domain = 13C  
X\_freq = 100.52530333 [MHz]  
X\_offset = 100 [ppm]  
X\_points = 32768  
X\_prescans = 4  
X\_resolution = 0.95846665 [Hz]  
X\_sweep = 31.40703518 [MHz]  
Irr\_domain = 1H  
Irr\_freq = 399.78219838 [MHz]  
Irr\_offset = 5 [ppm]  
Clipped = TRUE  
Mod\_return = 1  
Scans = 16000  
Total\_scans = 16000  
X\_90\_width = 12.84 [us]  
X\_acq\_time = 1.04333312 [s]  
X\_angle = 30 [deg]  
X\_atn = 9 [dB]  
X\_pulse = 4.28 [us]  
Irr\_atn\_dec = 27 [dB]  
Irr\_atn\_noe = 27 [dB]  
Irr\_noise = WALTZ  
Decoupling = TRUE  
Initial\_wait = 1 [s]  
Noe = TRUE  
Noe\_time = 3 [s]  
Recvr\_gain = 60  
Relaxation\_delay = 3 [s]  
Repetition\_time = 4.04333312 [s]  
Temp\_get = 20 [dC]

COMPOUND 177

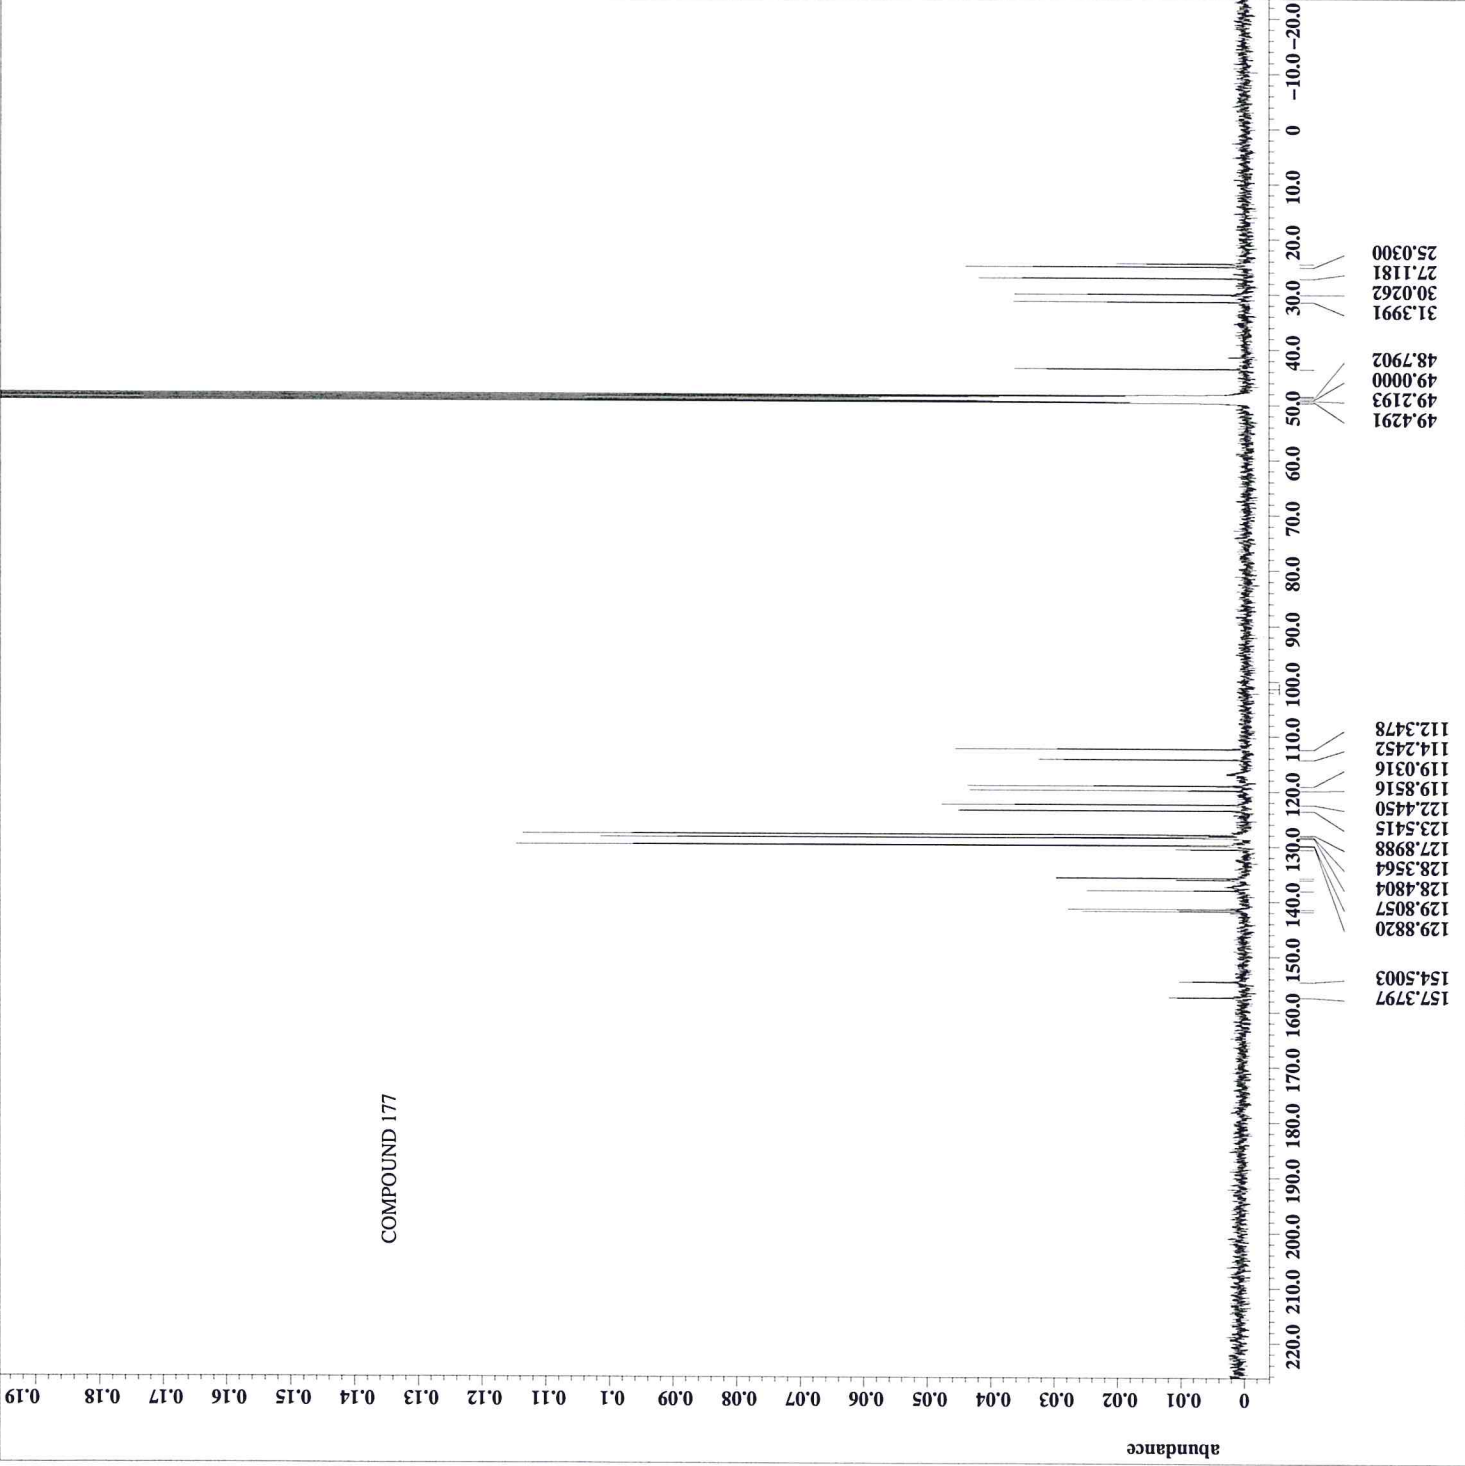

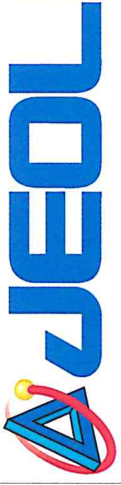

Filename = SM-I-79-4.jdf  
Author = mcrider  
Experiment = single\_pulse.ex2  
Sample\_id = S#582014  
Solvent = DMSO-D6  
Creation\_time = 18-MAR-2021 12:59:14  
Revision\_time = 18-MAR-2021 16:21:37  
Current\_time = 18-MAR-2021 16:21:45  
Comment = single\_pulse  
Data\_format = 1D COMPLEX  
Dim\_size = 13107  
Dim\_title = 1H  
Dim\_units = [ppm]  
Dimensions = X  
Site = ECS 400  
Spectrometer = JNM-ECS400  
Field\_strength = 9.389766[T] (400 [MHz])  
X\_acq\_duration = 2.18365952[s]  
X\_domain = 1H  
X\_freq = 399.78219838 [MHz]  
X\_offset = 5 [ppm]  
X\_points = 16384  
X\_prescans = 1  
X\_resolution = 0.45794685 [Hz]  
X\_sweep = 7.5030012 [kHz]  
Irr\_domain = 1H  
Irr\_freq = 399.78219838 [MHz]  
Irr\_offset = 5 [ppm]  
Tri\_domain = 1H  
Tri\_freq = 399.78219838 [MHz]  
Tri\_offset = 5 [ppm]  
Clipped = TRUE  
Mod\_return = 1  
Scans = 8  
Total\_scans = 8  
X\_90\_width = 13.15 [us]  
X\_acq\_time = 2.18365952 [s]  
X\_angle = 45 [deg]  
X\_atn = 6 [dB]  
X\_pulse = 6.575 [us]  
Irr\_mode = Off  
Tri\_mode = Off  
Dante\_preset = FALSE  
Initial\_wait = 1 [s]  
Recvr\_gain = 50  
Relaxation\_delay = 5 [s]  
Repetition\_time = 7.18365952 [s]  
Temp\_get = 25 [dC]

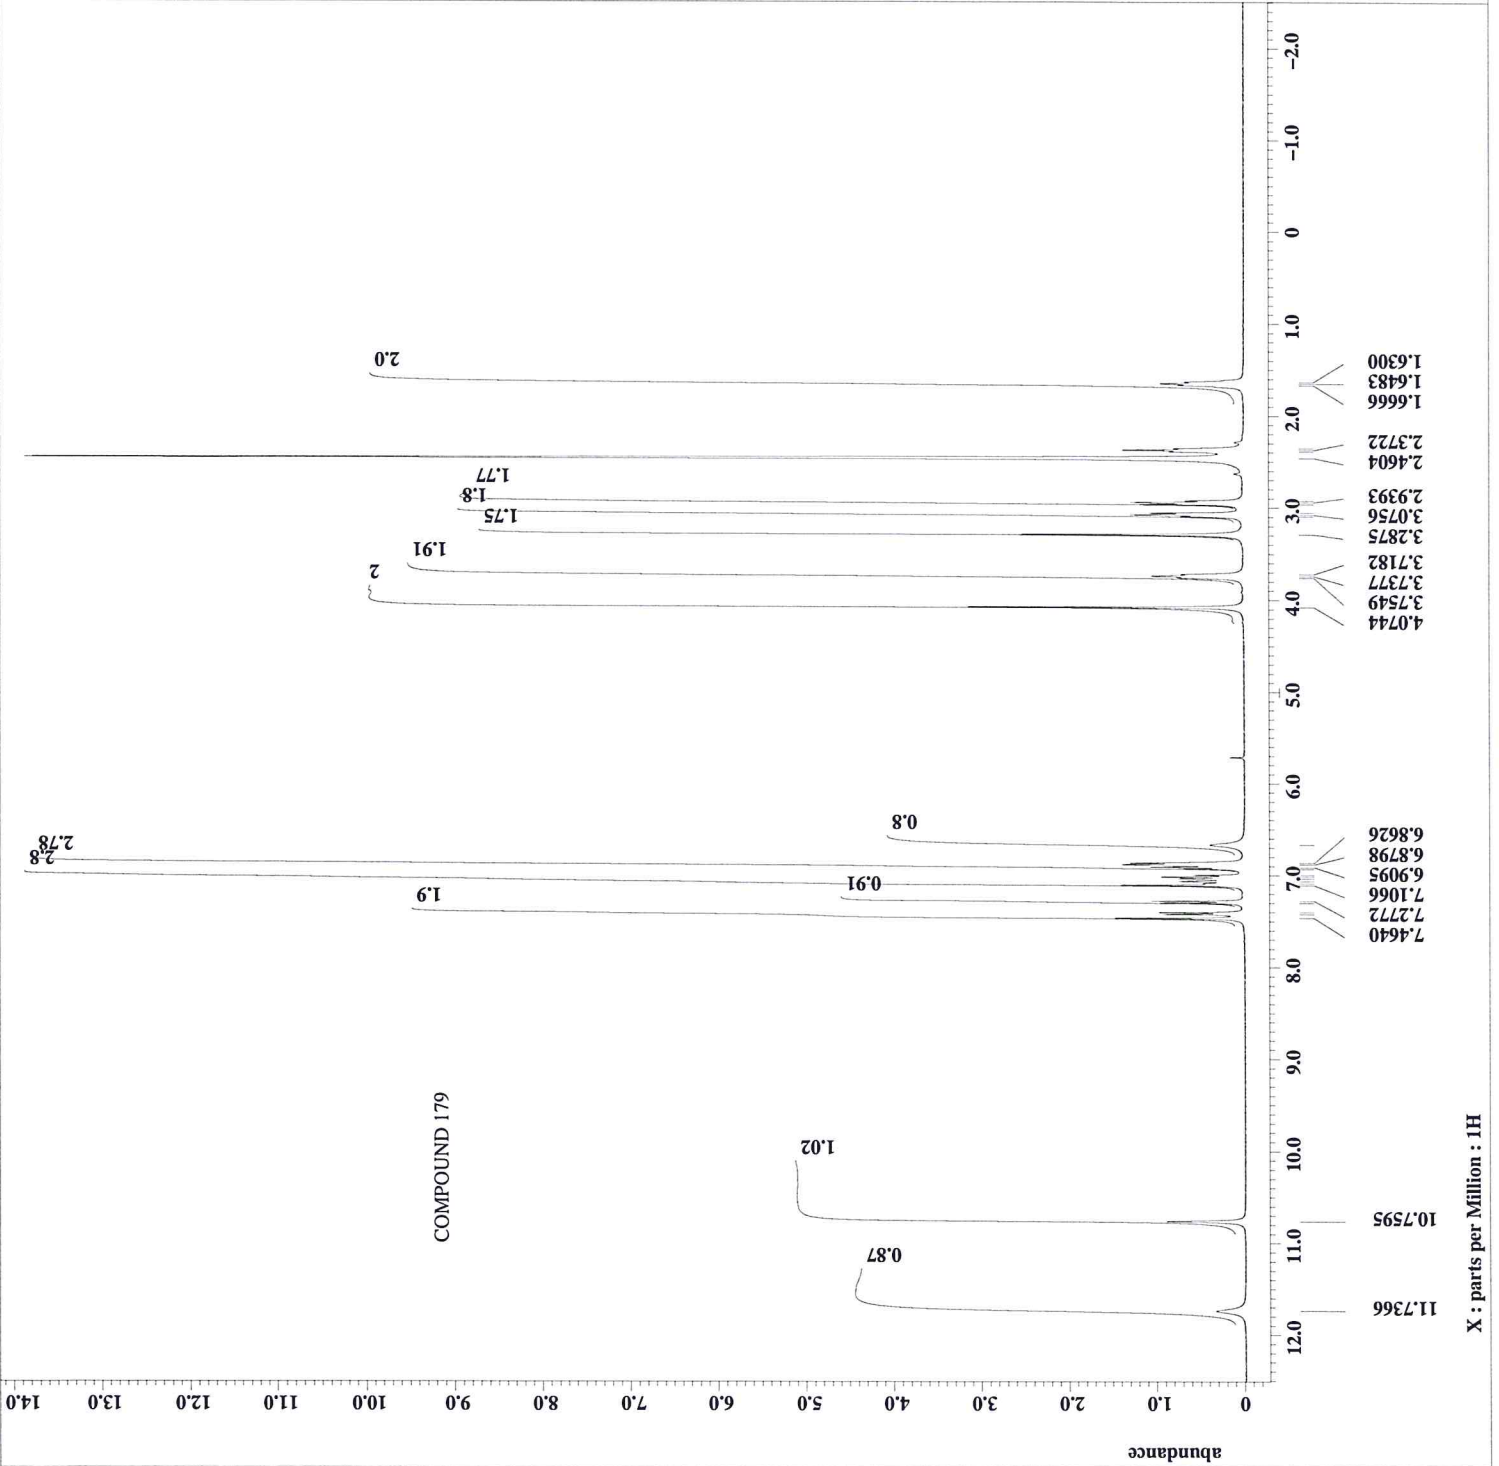

X : parts per Million : 1H



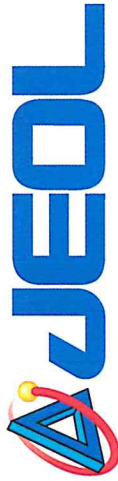

Filename = SM-I-79\_CARBON-7.jdf  
Author = mcrider  
Experiment = single\_pulse\_dec  
Sample\_id = SM-I-79  
Solvent = DMSO-D6  
Creation\_time = 19-MAR-2021 01:53:49  
Revision\_time = 19-MAR-2021 09:14:06  
Current\_time = 19-MAR-2021 09:15:48  
Data\_format = 1D COMPLEX  
Dim\_size = 26214  
Dim\_title = 13C  
Dim\_units = [ppm]  
Dimensions = X  
Site = ECS 400  
Spectrometer = JNM-ECS400  
Field\_strength = 9.389766[T] (400[MHz])  
X\_acq\_duration = 1.04333312[s]  
X\_domain = 13C  
X\_freq = 100.52530333[MHz]  
X\_offset = 100[ppm]  
X\_points = 32768  
X\_prescans = 4  
X\_resolution = 0.95846665[Hz]  
X\_sweep = 31.40703518[kHz]  
Irr\_domain = 1H  
Irr\_freq = 399.78219838[MHz]  
Irr\_offset = 5[ppm]  
Clipped = TRUE  
Mod\_return = 1  
Scans = 15000  
Total\_scans = 15000  
X\_90\_width = 10.35[us]  
X\_acq\_time = 1.04333312[s]  
X\_angle = 30[deg]  
X\_atn = 10.6[db]  
X\_pulse = 3.45[us]  
Irr\_atn\_dec = 25[db]  
Irr\_atn\_noe = 25[db]  
Irr\_noise = WALTZ  
Decoupling = TRUE  
Initial\_wait = 1[s]  
Noe = TRUE  
Noe\_time = 2[s]  
Recvr\_gain = 58  
Relaxation\_delay = 2[s]  
Repetition\_time = 3.04333312[s]  
Temp\_get = 25[dc]

COMPOUND 179

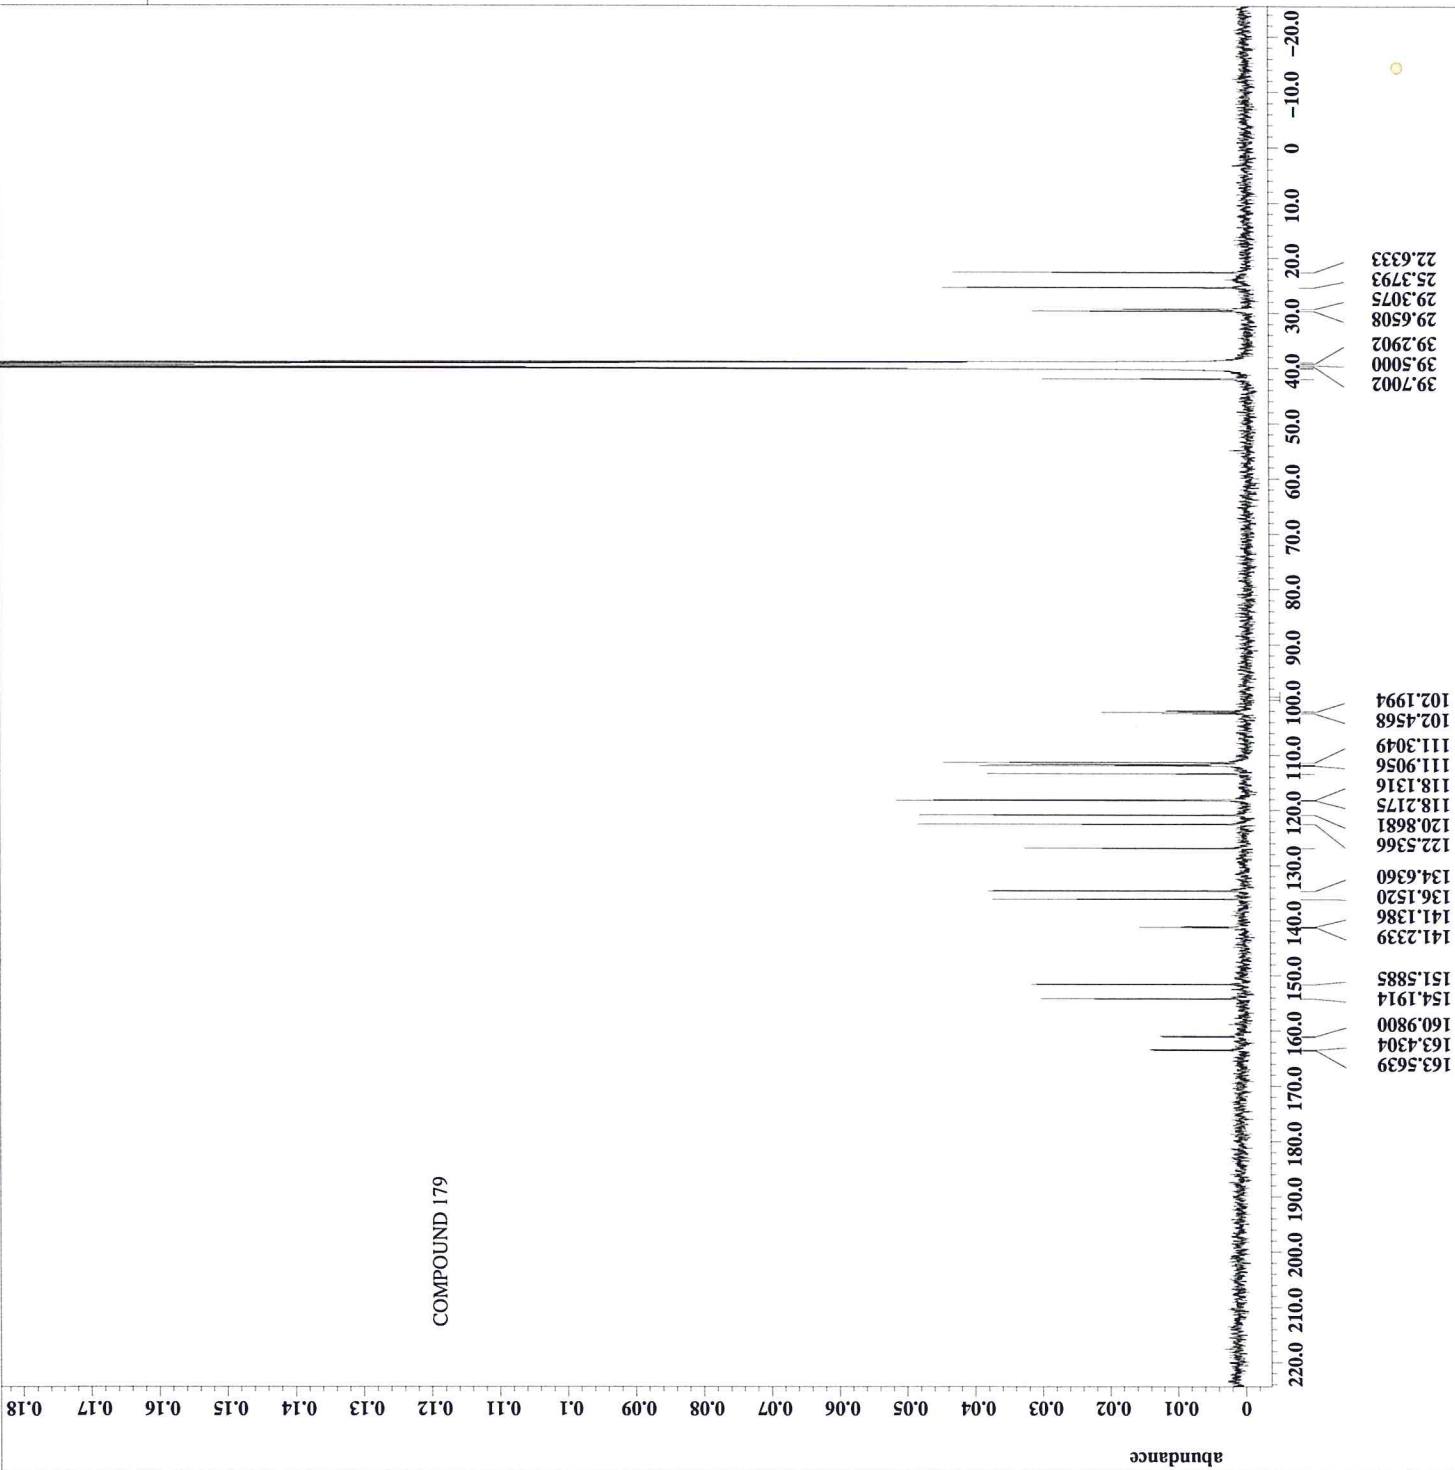

X : parts per Million : 13C

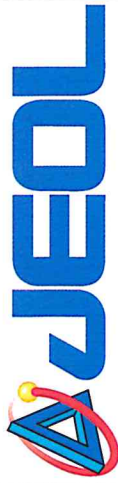

Filename = SK-I-25\_PROTON-4.jaf  
Author = Delta  
Experiment = single\_pulse.ex2  
Sample\_id = SK-I-25  
Solvent = METHANOL-D3  
Creation\_time = 21-MAR-2017 09:16:25  
Revision\_time = 11-MAR-2021 14:22:21  
Current\_time = 11-MAR-2021 14:22:25

Data\_format = 1D COMPLEX  
Dim\_size = 13107  
Dim\_title = 1H  
Dim\_units = [ppm]  
Dimensions = X  
Site = ECS 400  
Spectrometer = JNM-ECS400

Field\_strength = 9.389766[T] (400 [MHz])  
X\_acq\_duration = 2.18365952[s]  
X\_domain = 1H  
X\_freq = 399.78219838 [MHz]  
X\_offset = 5 [ppm]  
X\_points = 16384  
X\_prescans = 1  
X\_resolution = 0.45794685 [Hz]  
X\_sweep = 7.5030012 [kHz]  
Irr\_domain = 1H  
Irr\_freq = 399.78219838 [MHz]  
Irr\_offset = 5 [ppm]  
Tri\_domain = 1H  
Tri\_freq = 399.78219838 [MHz]  
Tri\_offset = 5 [ppm]  
Clipped = FALSE  
Mod\_return = 1  
Scans = 16  
Total\_scans = 16

X\_90\_width = 10.68 [us]  
X\_acq\_time = 2.18365952 [s]  
X\_angle = 45 [deg]  
X\_atn = 6 [dB]  
X\_pulse = 5.34 [us]  
Irr\_mode = Off  
Tri\_mode = Off  
Dante\_preset = FALSE  
Initial\_wait = 1 [s]  
Recvr\_gain = 44  
Relaxation\_delay = 4 [s]  
Repetition\_time = 6.18365952 [s]  
Temp\_get = 28 [dC]

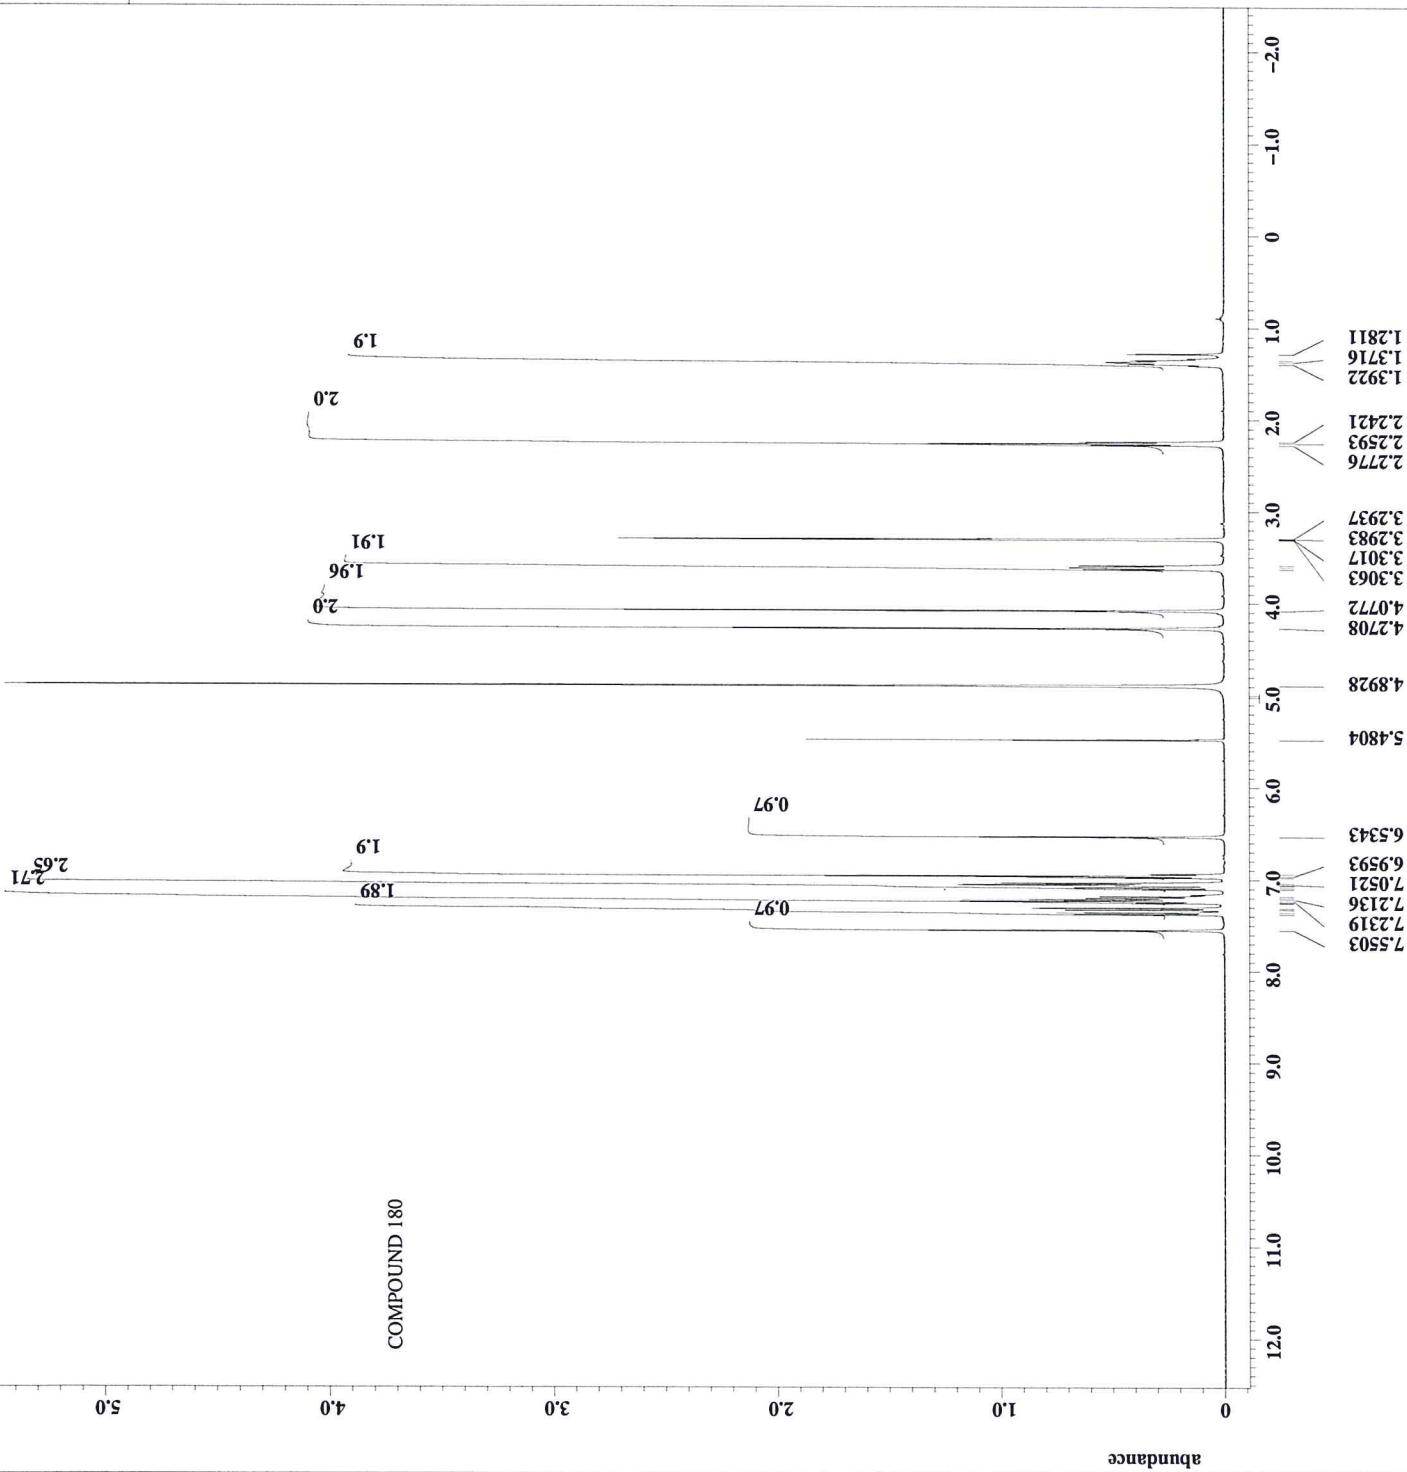

X : parts per Million : 1H

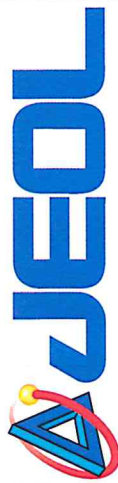

Filename = SK-I-25\_CARBON-5.jdf  
Author = Delta  
Experiment = single\_pulse\_dec  
Sample\_id = SK-I-25  
Solvent = METHANOL-D3  
Creation\_time = 21-MAR-2017 11:02:40  
Revision\_time = 11-MAR-2021 14:24:33  
Current\_time = 11-MAR-2021 14:24:37  
Data\_format = 1D COMPLEX  
Dim\_size = 26214  
Dim\_title = 13C  
Dim\_units = [ppm]  
Dimensions = X  
Site = ECS 400  
Spectrometer = JNM-ECS400  
Field\_strength = 9.389766[T] (400 [MHz])  
X\_acq\_duration = 1.04333312[s]  
X\_domain = 13C  
X\_freq = 100.52530333 [MHz]  
X\_offset = 100 [ppm]  
X\_points = 32768  
X\_prescans = 4  
X\_resolution = 0.95846665 [Hz]  
X\_sweep = 31.40703518 [kHz]  
Irr\_domain = 1H  
Irr\_freq = 399.78219838 [MHz]  
Irr\_offset = 5 [ppm]  
Clipped = TRUE  
Mod\_return = 1  
Scans = 2048  
Total\_scans = 2048  
X\_90\_width = 12.84 [us]  
X\_acq\_time = 1.04333312 [s]  
X\_angle = 30 [deg]  
X\_atn = 9 [dB]  
X\_pulse = 4.28 [us]  
Irr\_atn\_dec = 27 [dB]  
Irr\_atn\_noe = 27 [dB]  
Irr\_noise = WALTZ  
Decoupling = TRUE  
Initial\_wait = 1 [s]  
Noe = TRUE  
Noe\_time = 2 [s]  
Recvr\_gain = 60  
Relaxation\_delay = 2 [s]  
Repetition\_time = 3.04333312 [s]  
Temp\_get = 26.2 [dC]

COMPOUND 180

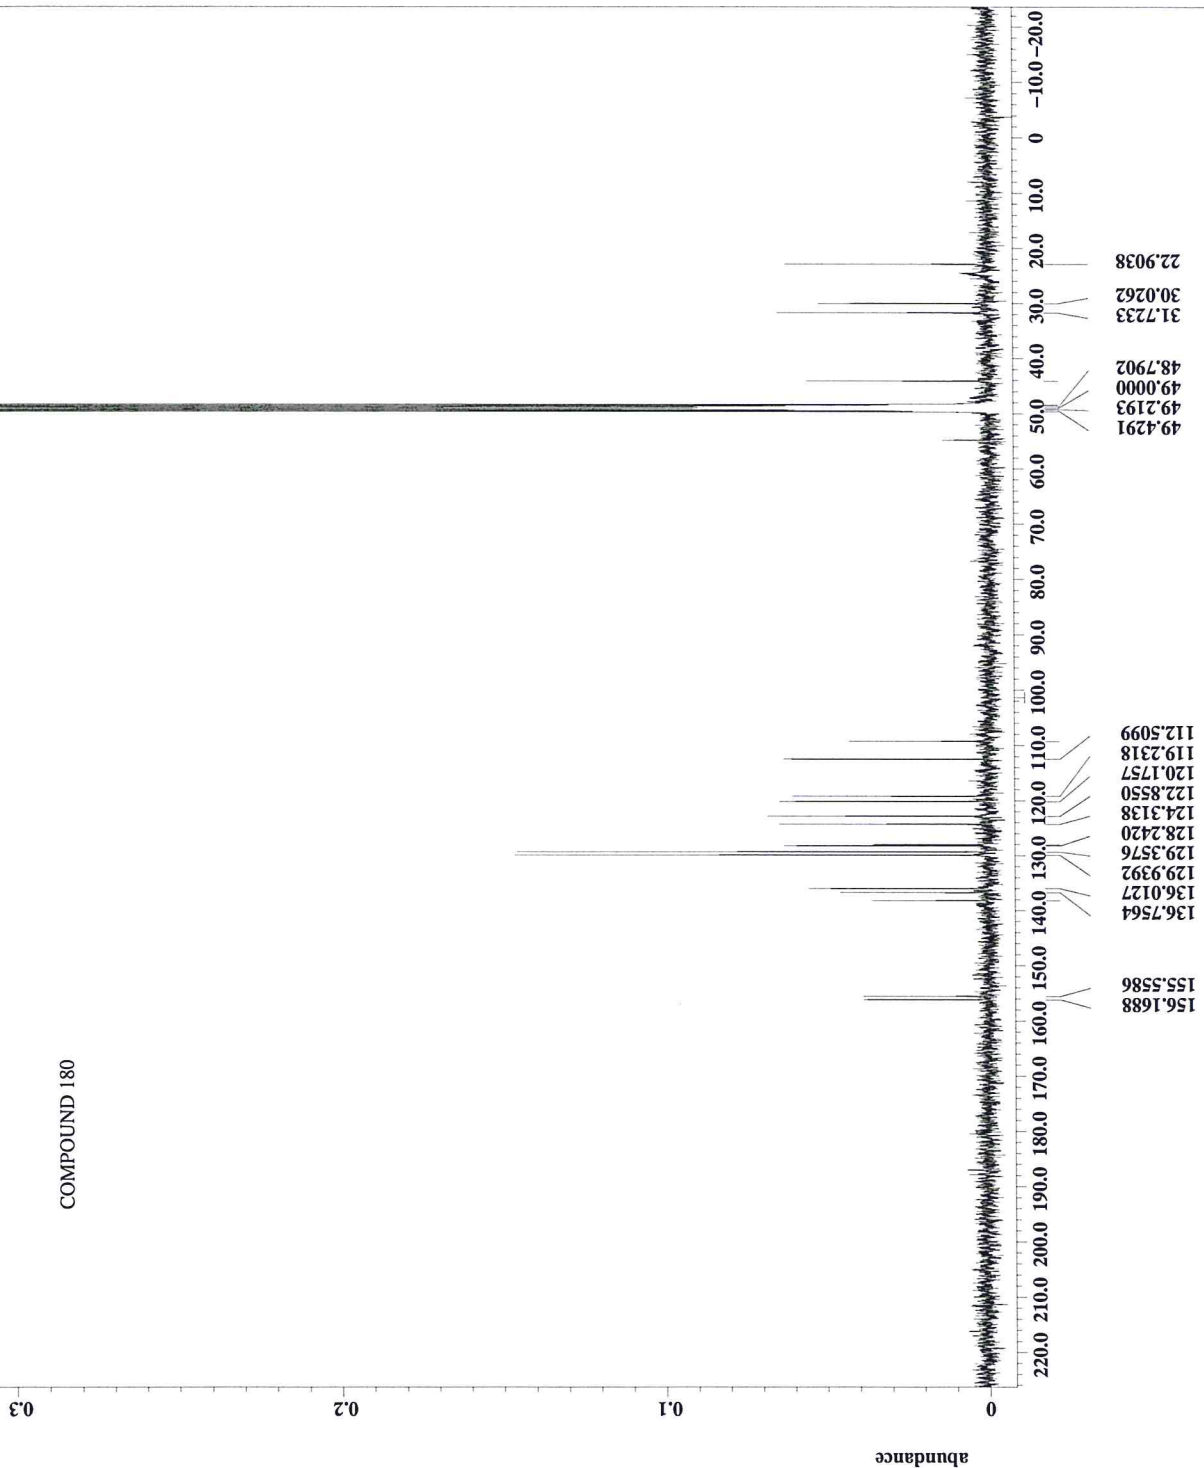

X : parts per Million : 13C

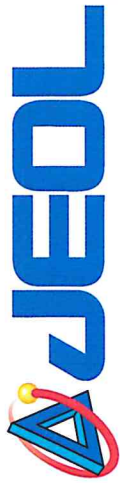

Filename = MM-I-89\_PROTON-6.jdf  
Author = Delta  
Experiment = single\_pulse.ex2  
Sample\_id = MM-I-89  
Solvent = METHANOL-D3  
Creation\_time = 7-APR-2017 12:23:33  
Revision\_time = 12-MAR-2021 09:30:32  
Current\_time = 12-MAR-2021 09:30:37

Data\_format = 1D COMPLEX  
Dim\_size = 13107  
Dim\_title = 1H  
Dim\_units = [ppm]  
Dimensions = X  
Site = ECS 400  
Spectrometer = JNM-ECS400

Field\_strength = 9.389766 [T] (400 [MHz])  
X\_acq\_duration = 2.18365952 [s]  
X\_domain = 1H  
X\_freq = 399.78219838 [MHz]  
X\_offset = 5 [ppm]  
X\_points = 16384  
X\_prescans = 1  
X\_resolution = 0.45794685 [Hz]  
X\_sweep = 7.5030012 [kHz]  
Irr\_domain = 1H  
Irr\_freq = 399.78219838 [MHz]  
Irr\_offset = 5 [ppm]  
Tri\_domain = 1H  
Tri\_freq = 399.78219838 [MHz]  
Tri\_offset = 5 [ppm]  
Clipped = FALSE  
Mod\_return = 1  
Scans = 16  
Total\_scans = 16

X\_90\_width = 10.68 [us]  
X\_acq\_time = 2.18365952 [s]  
X\_angle = 45 [deg]  
X\_atn = 6 [dB]  
X\_pulse = 5.34 [us]  
Irr\_mode = Off  
Tri\_mode = Off  
Dante\_presat = FALSE  
Initial\_wait = 1 [s]  
Recvr\_gain = 44  
Relaxation\_delay = 4 [s]  
Repetition\_time = 6.18365952 [s]  
Temp\_get = 38 [DC]

COMPOUND 181

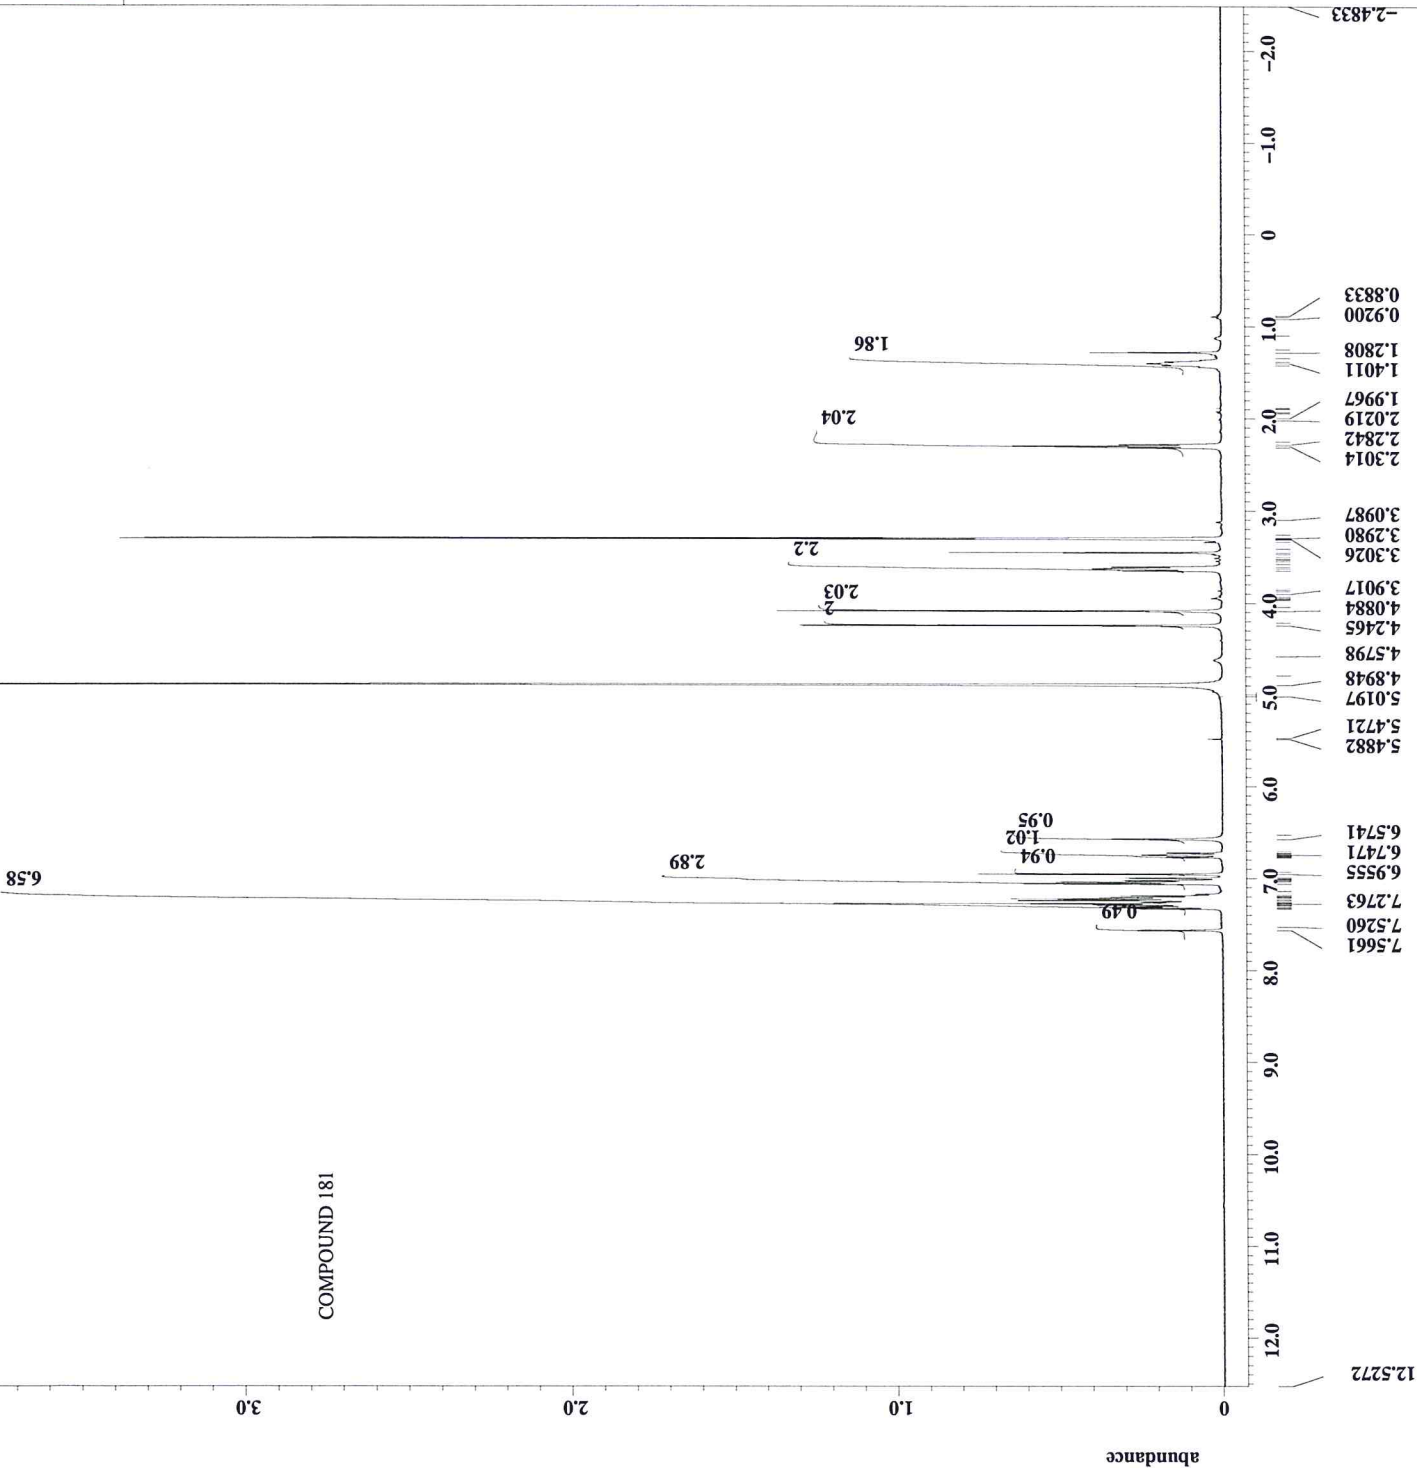

X : parts per Million : 1H



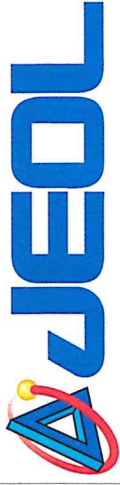

File name = MM-I-89\_CARBON-5.jdf  
Author = Delta  
Experiment = single\_pulse\_dec  
Sample\_id = MM-I-89  
Solvent = METHANOL-D3  
Creation time = 7-APR-2017 14:35:29  
Revision time = 12-MAR-2021 09:33:03  
Current\_time = 12-MAR-2021 09:33:10  
Data\_format = 1D COMPLEX  
Dim\_size = 26214  
Dim\_title = 13C  
Dim\_units = [ppm]  
Dimensions = X  
Site = ECS 400  
Spectrometer = JNM-ECS400  
Field\_strength = 9.389766[T] (400 [MHz])  
X\_acq\_duration = 1.04333312[s]  
X\_domain = 13C  
X\_freq = 100.52530333 [MHz]  
X\_offset = 100 [ppm]  
X\_points = 32768  
X\_prescans = 4  
X\_resolution = 0.95846665 [Hz]  
X\_sweep = 31.40703518 [kHz]  
Irr\_domain = 1H  
Irr\_freq = 399.78219838 [MHz]  
Irr\_offset = 5 [ppm]  
Clipped = FALSE  
Mod\_return = 1  
Scans = 1929  
Total\_scans = 1929  
X\_90\_width = 12.84 [us]  
X\_acq\_time = 1.04333312 [s]  
X\_angle = 30 [deg]  
X\_atn = 9 [dB]  
X\_pulse = 4.28 [us]  
Irr\_atn\_dec = 27 [dB]  
Irr\_atn\_noe = 27 [dB]  
Irr\_noise = WALTZ  
Decoupling = TRUE  
Initial\_wait = 1 [s]  
Noe = TRUE  
Noe\_time = 3 [s]  
Recvr\_gain = 60  
Relaxation\_delay = 3 [s]  
Repetition\_time = 4.04333312 [s]  
Temp\_get = 38.2 [degC]

COMPOUND 181

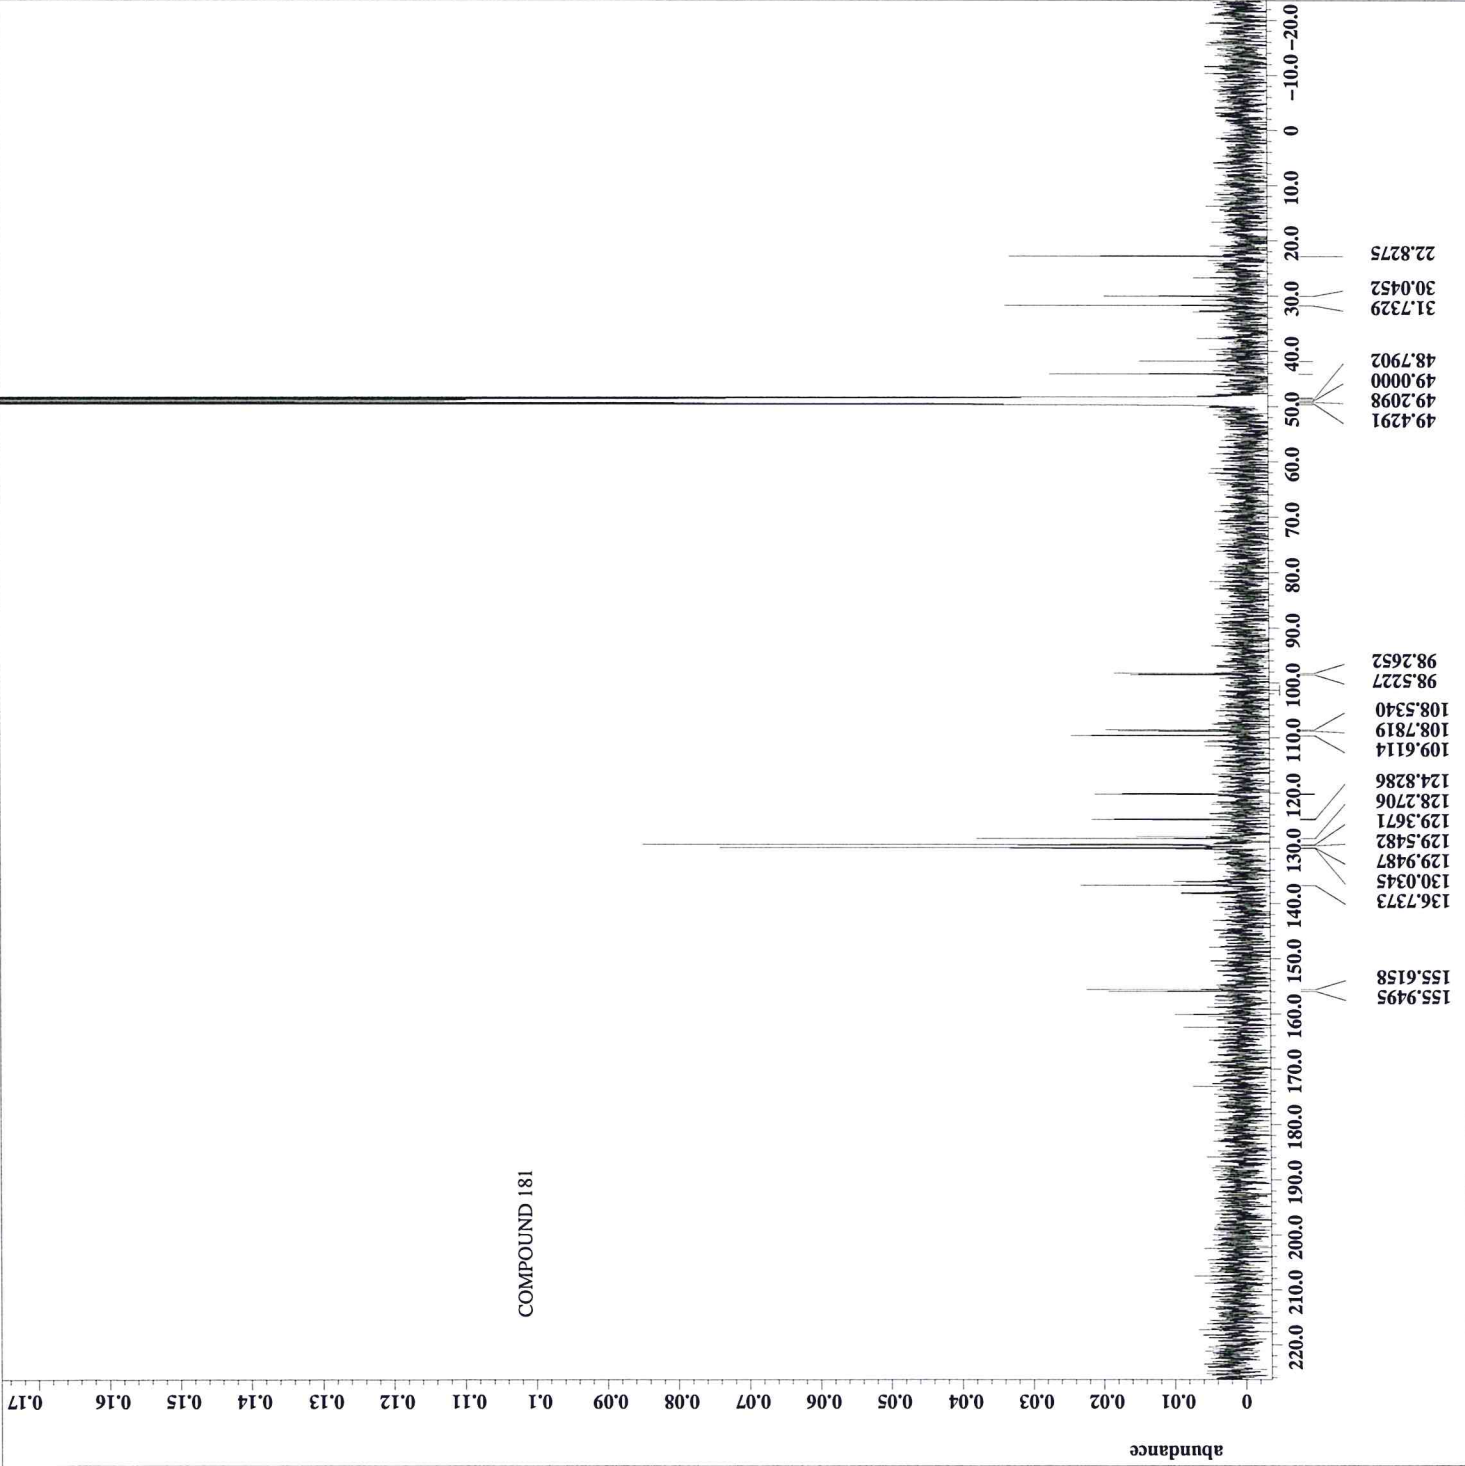

X : parts per Million : 13C

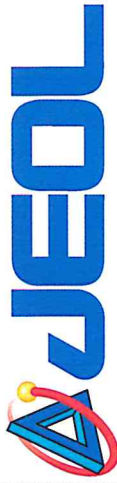

Filename = SK-I-53\_PROTON-6.jdf  
Author = Delta  
Experiment = single\_pulse.ex2  
Sample\_id = SK-I-53  
Solvent = METHANOL-D3  
Creation\_time = 1-JUN-2017 10:31:01  
Revision\_time = 12-MAR-2021 11:28:10  
Current\_time = 12-MAR-2021 11:28:14  
Data\_format = 1D COMPLEX  
Dim\_size = 13107  
Dim\_title = 1H  
Dim\_units = [ppm]  
Dimensions = X  
Site = ECS 400  
Spectrometer = JNM-ECS400  
Field\_strength = 9.389766[T] (400 [MHz])  
X\_acq\_duration = 2.18365952[s]  
X\_domain = 1H  
X\_freq = 399.78219838 [MHz]  
X\_offset = 5 [ppm]  
X\_points = 16384  
X\_prescans = 1  
X\_resolution = 0.45794685 [Hz]  
X\_sweep = 7.5030012 [kHz]  
Irr\_domain = 1H  
Irr\_freq = 399.78219838 [MHz]  
Irr\_offset = 5 [ppm]  
Tri\_domain = 1H  
Tri\_freq = 399.78219838 [MHz]  
Tri\_offset = 5 [ppm]  
Clipped = FALSE  
Mod\_return = 1  
Total\_scans = 16  
X\_90\_width = 10.68 [us]  
X\_acq\_time = 2.18365952 [s]  
X\_angle = 45 [deg]  
X\_atn = 6 [dB]  
X\_pulse = 5.34 [us]  
Irr\_mode = Off  
Tri\_mode = Off  
Dante\_presat = FALSE  
Initial\_wait = 1 [s]  
Recvr\_gain = 44  
Relaxation\_delay = 4 [s]  
Repetition\_time = 6.18365952 [s]  
Temp\_get = 460.0 [dC]

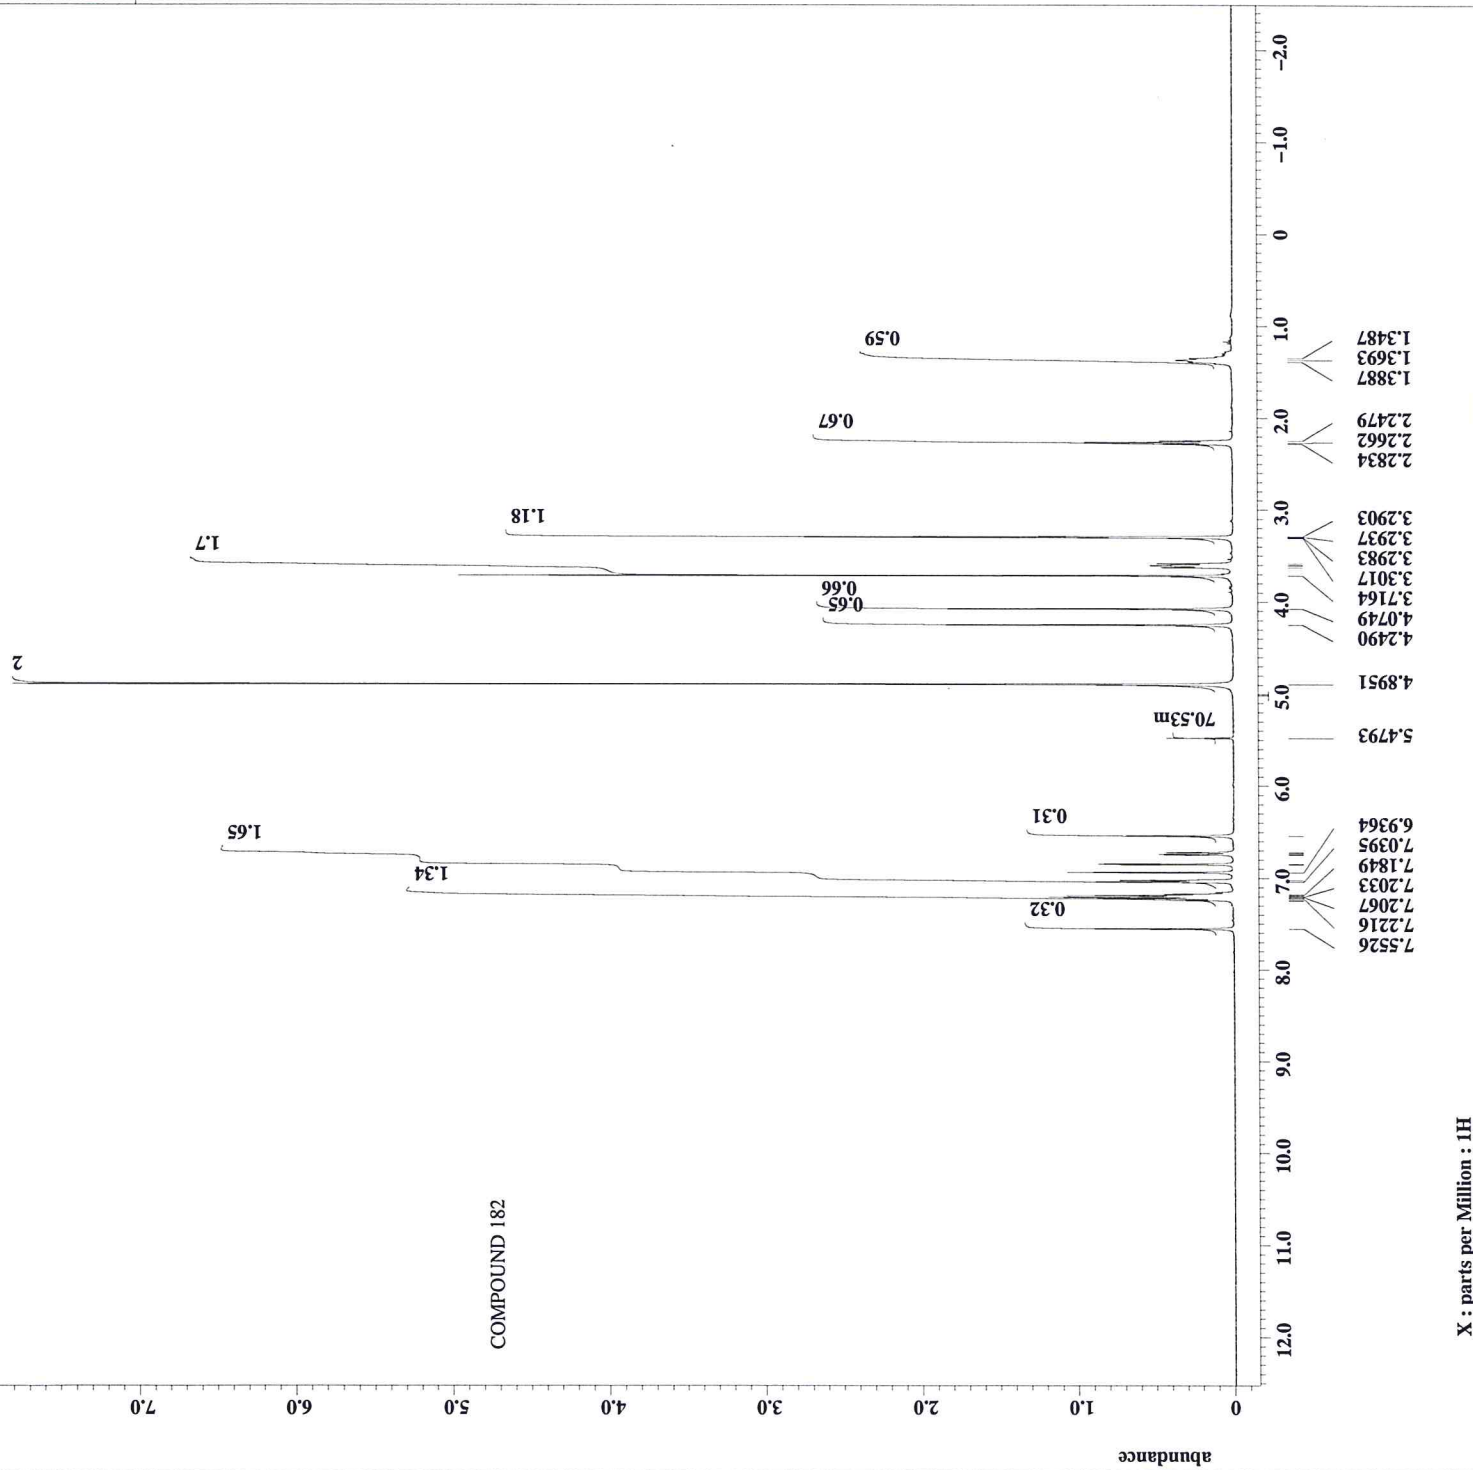

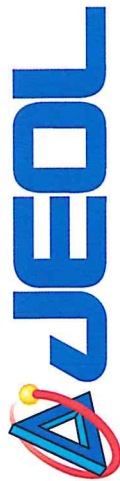

File name = SK-I-53\_CARBON-8.jdf  
Author = Delta  
Experiment = single\_pulse\_dec  
Sample\_id = SK-I-53  
Solvent = METHANOL-D3  
Creation\_time = 15-JUN-2017 04:26:29  
Revision\_time = 12-MAR-2021 11:30:29  
Current\_time = 12-MAR-2021 11:30:33

Data\_format = 1D COMPLEX  
Dim\_size = 26214  
Dim\_title = 13C  
Dim\_units = [ppm]  
Dimensions = X  
Site = EGS 400  
Spectrometer = JNM-ECS400

Field\_strength = 9.389766 [T] (400 [MHz])  
X\_acq\_duration = 1.04333312 [s]  
X\_domain = 13C  
X\_freq = 100.52530333 [MHz]  
X\_offset = 100 [ppm]  
X\_points = 32768  
X\_prescans = 4  
X\_resolution = 0.95846665 [Hz]  
X\_sweep = 31.40703518 [kHz]  
Irr\_domain = 1H  
Irr\_freq = 399.78219838 [MHz]  
Irr\_offset = 5 [ppm]  
Clipped = FALSE  
Mod\_return = 1  
Total\_scans = 12000

X\_90\_width = 12.84 [us]  
X\_acq\_time = 1.04333312 [s]  
X\_angle = 30 [deg]  
X\_atn = 9 [dB]  
X\_pulse = 4.28 [us]  
Irr\_atn\_dec = 27 [dB]  
Irr\_atn\_noe = 27 [dB]  
Irr\_noise = WALTZ  
Decoupling = TRUE  
Initial\_wait = 1 [s]  
Noe = TRUE  
Noe\_time = 2 [s]  
Recvr\_gain = 60  
Relaxation\_delay = 2 [s]  
Repetition\_time = 3.04333312 [s]  
Temp\_get = 460.0 [dC]

COMPOUND 182

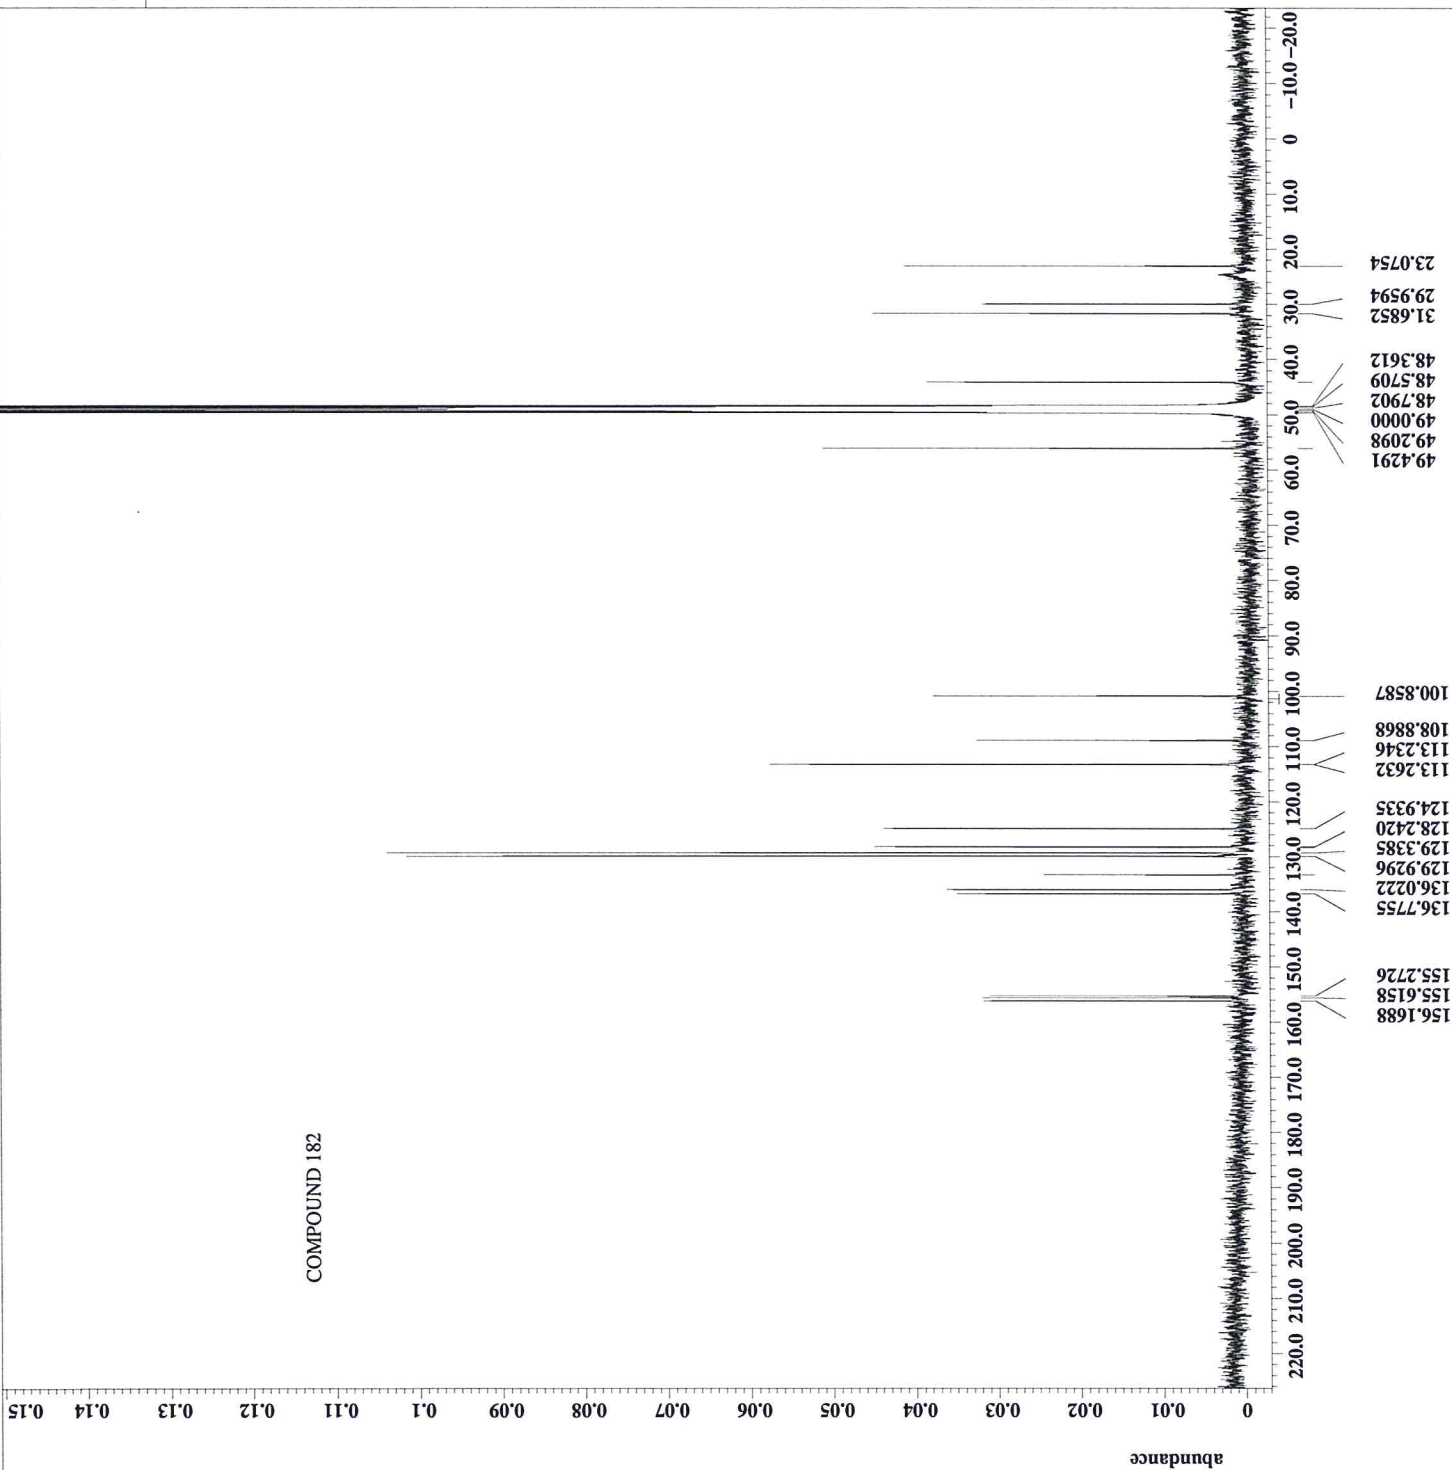

X : parts per Million : 13C

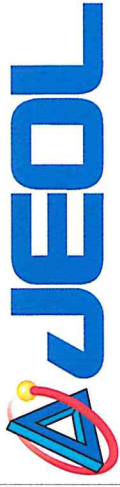

Filename = SK-I-16\_PROTON-7.jdf  
Author = Delta  
Experiment = single\_pulse.ex2  
Sample\_id = SK-I-16  
Solvent = DMSO-D6  
Creation\_time = 12-APR-2018 14:59:41  
Revision\_time = 11-MAR-2021 14:39:20  
Current\_time = 11-MAR-2021 14:39:24  
Date\_format = 1D COMPLEX  
Dim\_size = 13107  
Dim\_title = 1H  
Dim\_units = [ppm]  
Dimensions = X  
Site = EGS 400  
Spectrometer = UNM-ECS400  
Field\_strength = 9.389766[T] (400 [MHz])  
X\_acq\_duration = 2.18365952[s]  
X\_domain = 1H  
X\_freq = 399.78219838 [MHz]  
X\_offset = 5 [ppm]  
X\_points = 16384  
X\_prescans = 1  
X\_resolution = 0.45794685 [Hz]  
X\_sweep = 7.5030012 [kHz]  
Irr\_domain = 1H  
Irr\_freq = 399.78219838 [MHz]  
Irr\_offset = 5 [ppm]  
Tri\_domain = 1H  
Tri\_freq = 399.78219838 [MHz]  
Tri\_offset = 5 [ppm]  
Clipped = FALSE  
Mod\_return = 1  
Total\_scans = 16  
X\_90\_width = 10.65 [us]  
X\_acq\_time = 2.18365952 [s]  
X\_angle = 45 [deg]  
X\_atn = 6 [dB]  
X\_pulse = 5.325 [us]  
Irr\_mode = Off  
Tri\_mode = Off  
Dante\_preset = FALSE  
Initial\_wait = 1 [s]  
Recvr\_gain = 46  
Relaxation\_delay = 4 [s]  
Repetition\_time = 6.18365952 [s]  
Temp\_get = 18.7 [dC]

COMPOUND 183

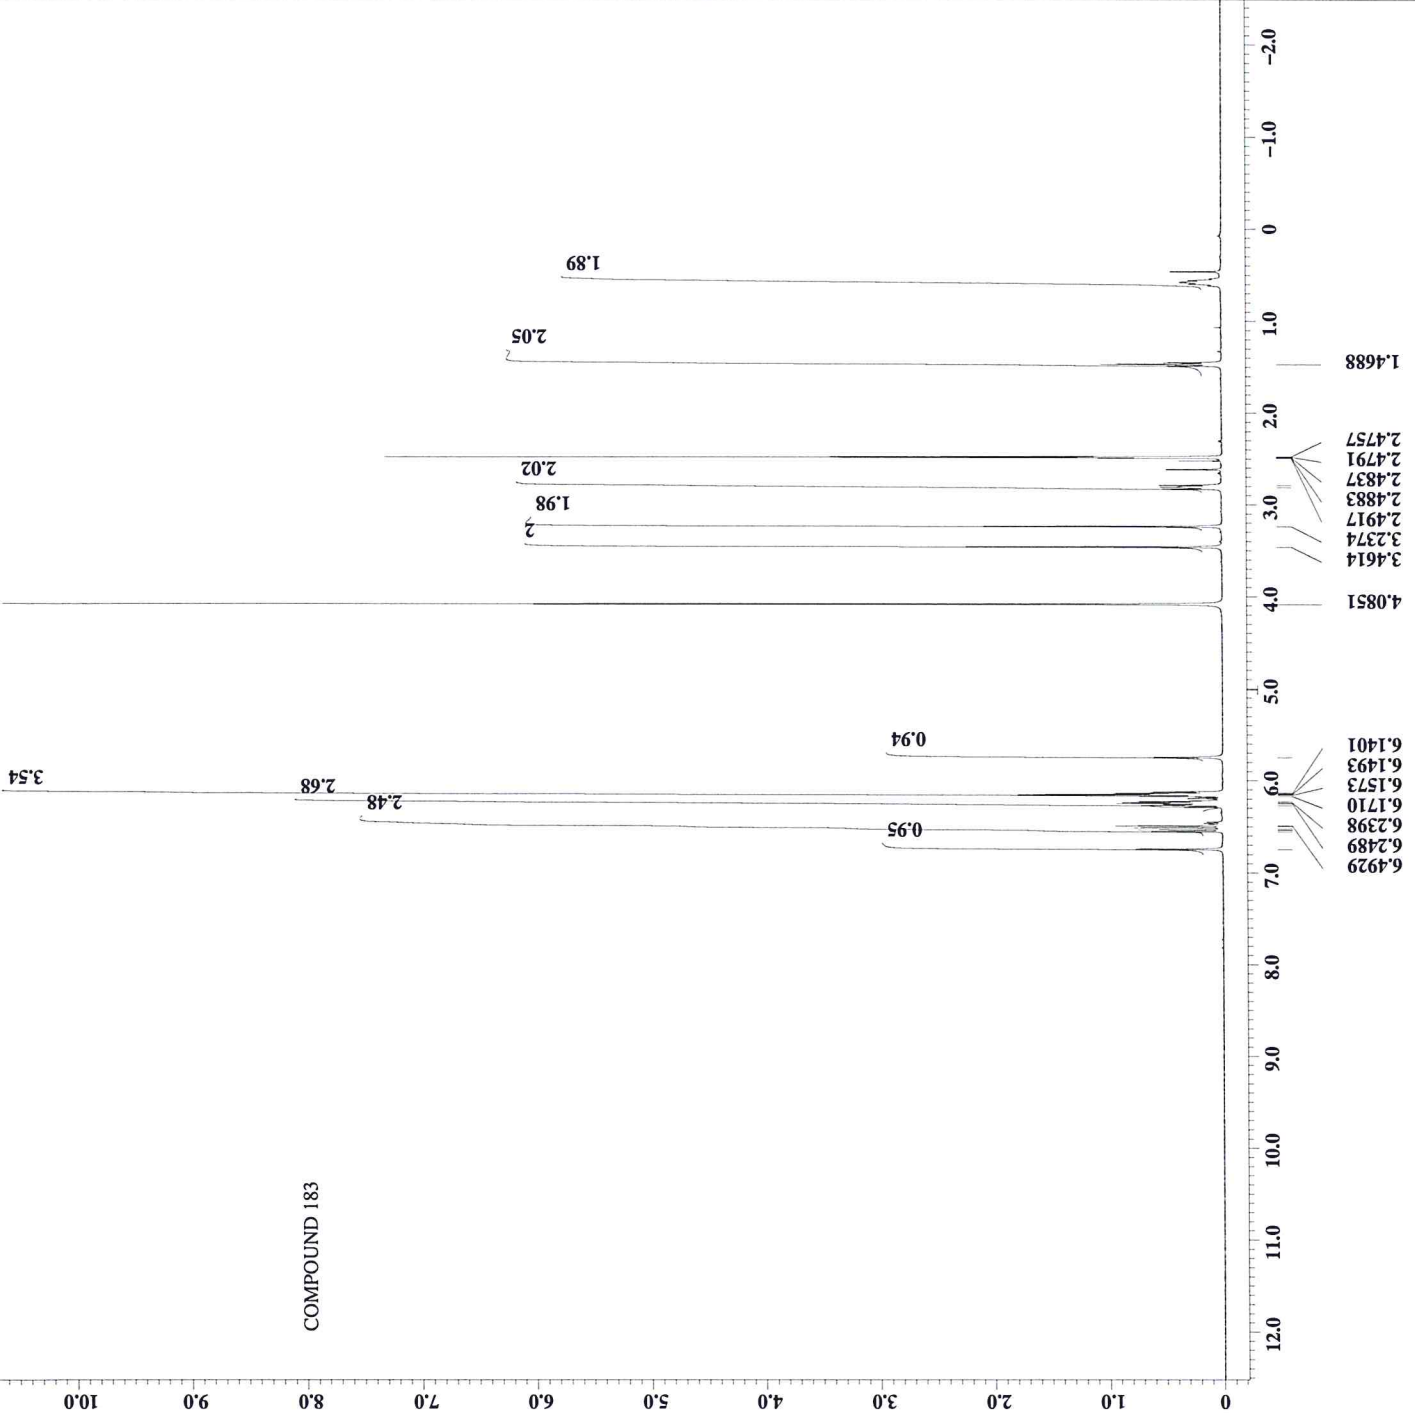

X : parts per Million : 1H



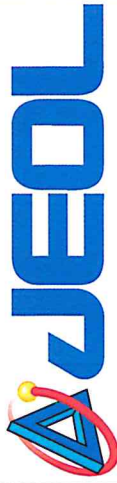

Filename = SK-I-16\_CARBON-8.jdf  
Author = Delta  
Experiment = single\_pulse\_dec  
Sample\_id = SK-I-16  
Solvent = DMSO-D6  
Creation\_time = 13-APR-2018 07:56:38  
Revision\_time = 11-MAR-2021 14:41:23  
Current\_time = 11-MAR-2021 14:41:27

Data\_format = 1D COMPLEX  
Dim\_size = 26214  
Dim\_title = 13C  
Dim\_units = [ppm]  
Dimensions = X  
Site = ECS 400  
Spectrometer = JNM-ECS400

Field\_strength = 9.389766[T] (400 [MHz])  
X\_acq\_duration = 1.04333312[s]  
X\_domain = 13C  
X\_freq = 100.52530333 [MHz]  
X\_offset = 100 [ppm]  
X\_points = 32768  
X\_prescans = 4  
X\_resolution = 0.95846665 [Hz]  
X\_sweep = 31.40703518 [kHz]  
Irr\_domain = 1H  
Irr\_freq = 399.78219838 [MHz]  
Irr\_offset = 5 [ppm]  
Clipped = FALSE  
Mod\_return = 1  
Total\_scans = 20000

X\_90\_width = 13.22 [us]  
X\_acq\_time = 1.04333312 [s]  
X\_angle = 30 [deg]  
X\_atn = 9 [dB]  
X\_pulse = 4.40666667 [us]  
Irr\_atn\_dec = 27 [dB]  
Irr\_atn\_noe = 27 [dB]  
Irr\_noise = WALTZ  
Decoupling = TRUE  
Initial\_wait = 1 [s]  
Noe = TRUE  
Noe\_time = 2 [s]  
Recvr\_gain = 60  
Relaxation\_delay = 2 [s]  
Repetition\_time = 3.04333312 [s]  
Temp\_get = 19 [dC]

COMPOUND 183

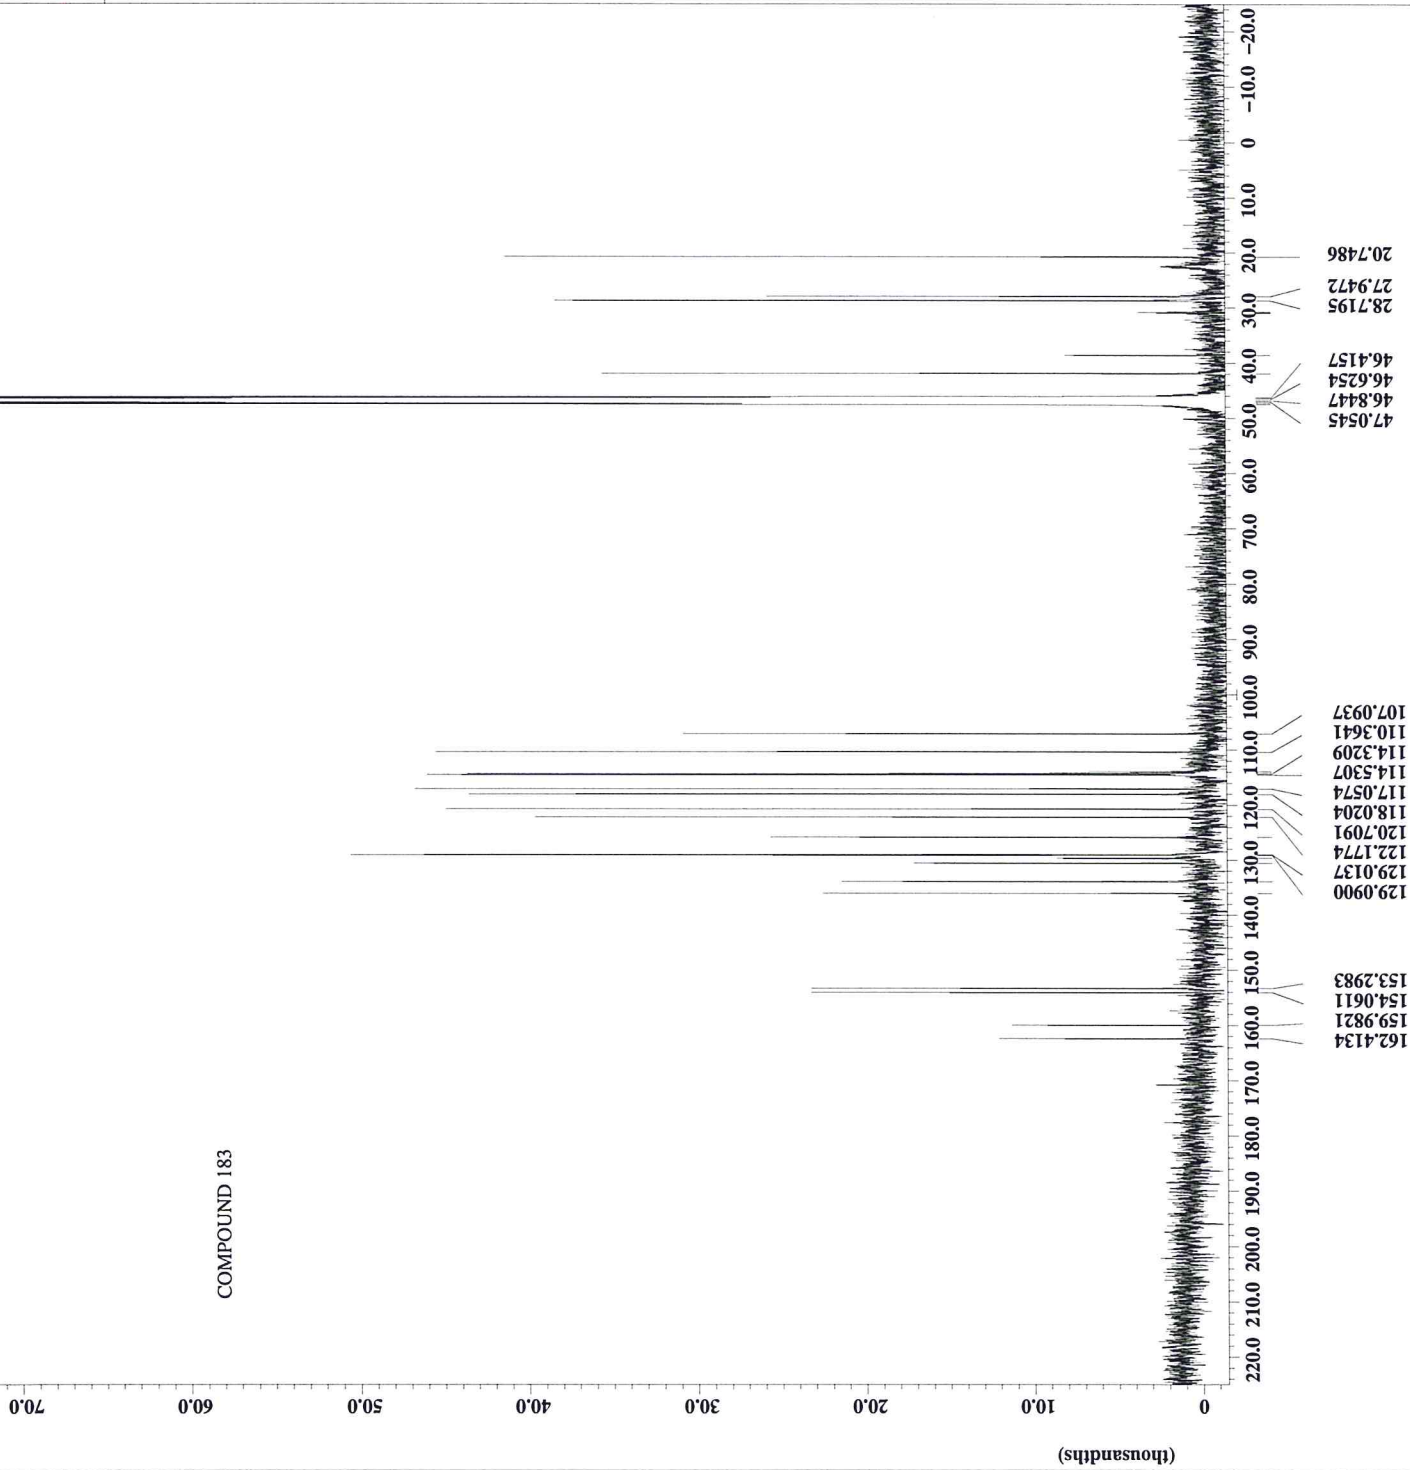

X : parts per Million : 13C

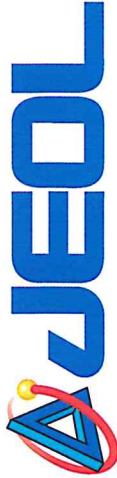

File: SK-I-91\_PROTON-7.jdf  
Author: Delta  
Experiment: single\_pulse.ex2  
Sample ID: SK-I-91  
Solvent: METHANOL-D3  
Creation time: 13-APR-2018 16:08:12  
Revision time: 12-MAR-2021 11:33:39  
Current time: 12-MAR-2021 11:33:43  
Data format: 1D COMPLEX  
Dim size: 13107  
Dim title: 1H  
Dim units: [ppm]  
Dimensions: X  
Site: ECS 400  
Spectrometer: JNM-ECS400  
Field strength: 9.389766 [T] (400 [MHz])  
X\_acq\_duration: 2.18365952 [s]  
X\_domain: 1H  
X\_freq: 399.78219838 [MHz]  
X\_offset: 5 [ppm]  
X\_points: 16384  
X\_prescans: 1  
X\_resolution: 0.45794685 [Hz]  
X\_sweep: 7.5030012 [kHz]  
Irr\_domain: 1H  
Irr\_freq: 399.78219838 [MHz]  
Irr\_offset: 5 [ppm]  
Tri\_domain: 1H  
Tri\_freq: 399.78219838 [MHz]  
Tri\_offset: 5 [ppm]  
Clipped: FALSE  
Mod\_return: 1  
Scans: 16  
Total\_scans: 16  
X\_90\_width: 10.65 [us]  
X\_acq\_time: 2.18365952 [s]  
X\_angle: 45 [deg]  
X\_atn: 6 [dB]  
X\_pulse: 5.325 [us]  
Irr\_mode: Off  
Tri\_mode: Off  
Dante\_presat: FALSE  
Initial\_wait: 1 [s]  
Recvr\_gain: 40  
Relaxation\_delay: 4 [s]  
Repetition\_time: 6.18365952 [s]  
Temp\_get: 18.7 [dC]

COMPOUND 184

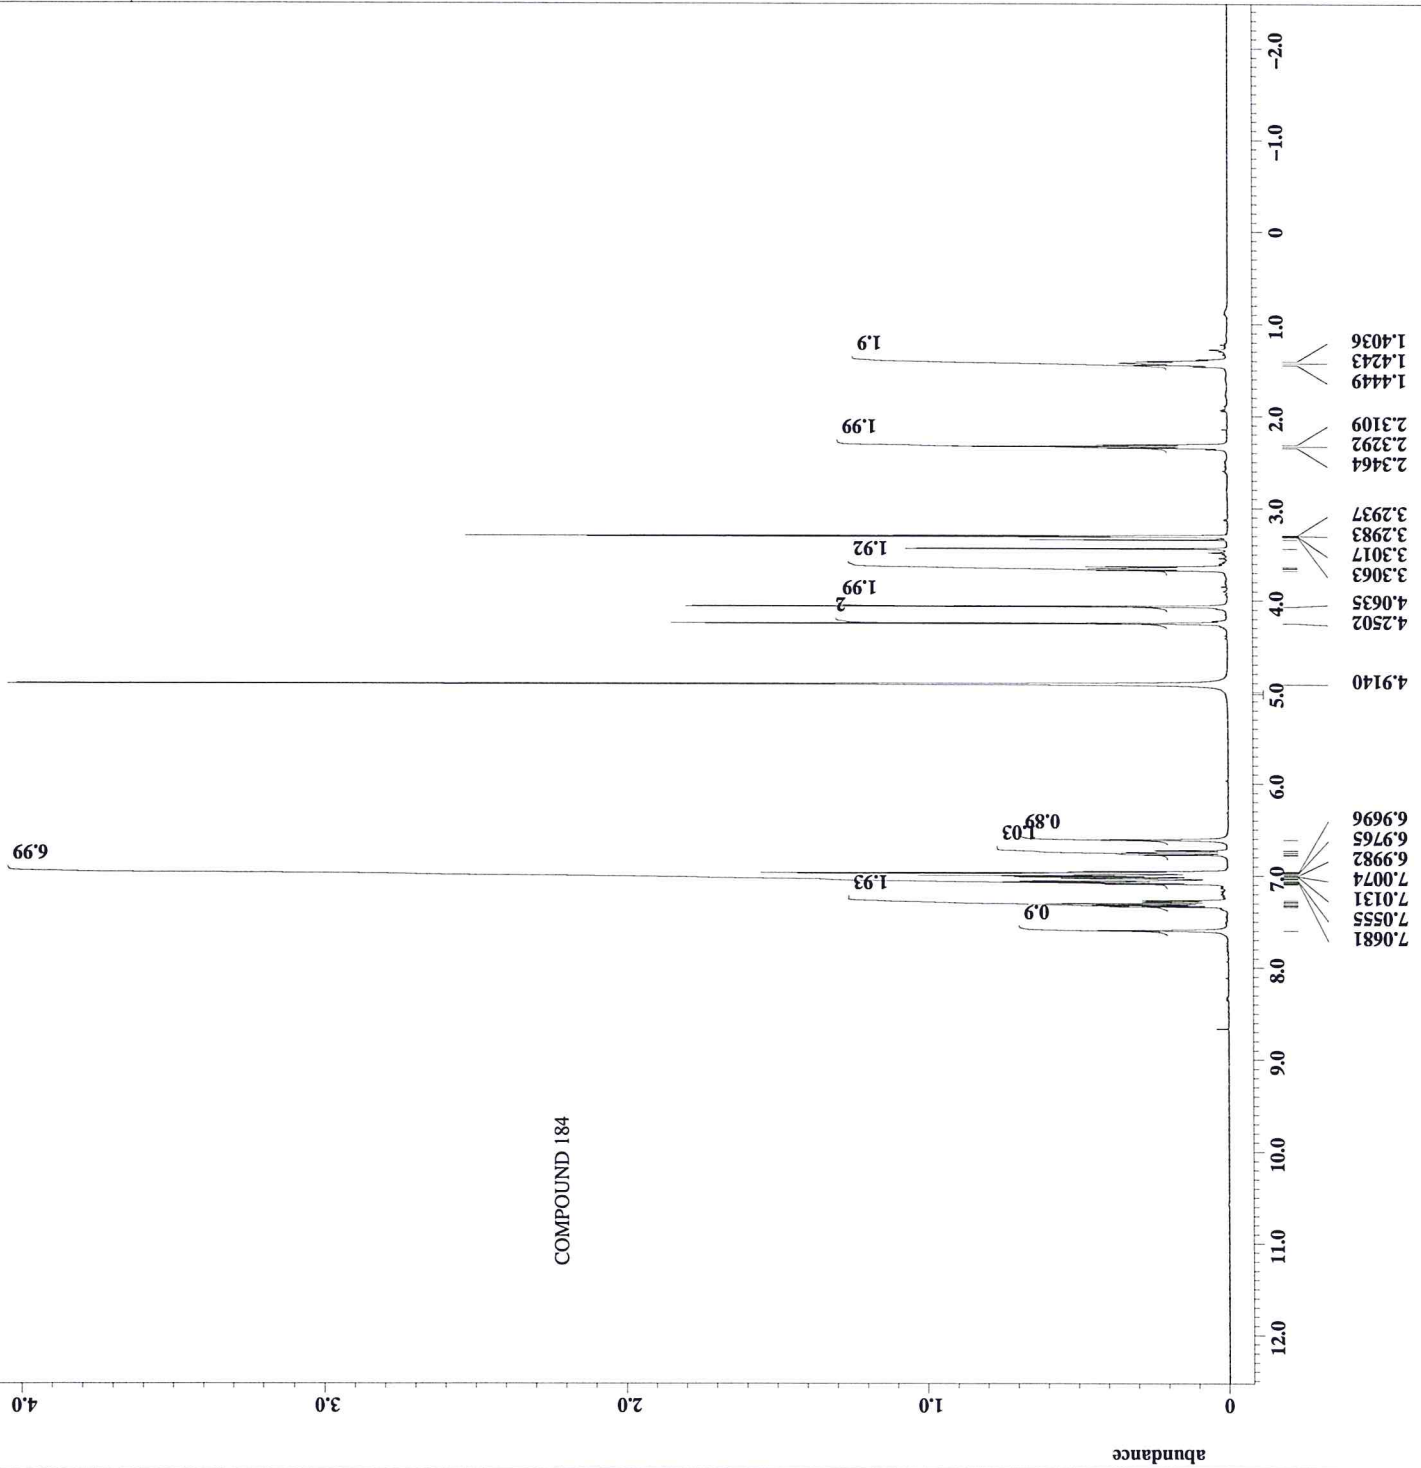

X : parts per Million : 1H

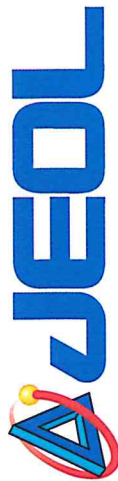

File name = SK-I-91\_CARBON-8.jdf  
Author = Delta  
Experiment = single\_pulse\_dec  
Sample\_id = SK-I-91  
Solvent = METHANOL-D3  
Creation\_time = 16-APR-2018 08:14:13  
Revision\_time = 12-MAR-2021 11:36:01  
Current\_time = 12-MAR-2021 11:36:05  
Data\_format = 1D COMPLEX  
Dim\_size = 26214  
Dim\_title = 13C  
Dim\_units = [ppm]  
Dimensions = X  
Site = ECS 400  
Spectrometer = JNM-ECS400  
Field\_strength = 9.389766[T] (400 [MHz])  
X\_acq\_duration = 1.04333312[s]  
X\_domain = 13C  
X\_freq = 100.52530333 [MHz]  
X\_offset = 100 [ppm]  
X\_points = 32768  
X\_prescans = 4  
X\_resolution = 0.95846665 [Hz]  
X\_sweep = 31.40703518 [kHz]  
Irr\_domain = 1H  
Irr\_freq = 399.78219838 [MHz]  
Irr\_offset = 5 [ppm]  
Clipped = TRUE  
Mod\_return = 1  
Scans = 75793  
Total\_scans = 75793  
X\_90\_width = 13.22 [us]  
X\_acq\_time = 1.04333312 [s]  
X\_angle = 30 [deg]  
X\_atn = 9 [dB]  
X\_pulse = 4.40666667 [us]  
Irr\_atn\_dec = 27 [dB]  
Irr\_atn\_noe = 27 [dB]  
Irr\_noise = WALTZ  
Decoupling = TRUE  
Initial\_wait = 1 [s]  
Noe = TRUE  
Noe\_time = 2 [s]  
Recvr\_gain = 60  
Relaxation\_delay = 2 [s]  
Repetition\_time = 3.04333312 [s]  
Temp\_get = 19.3 [dC]

COMPOUND 184

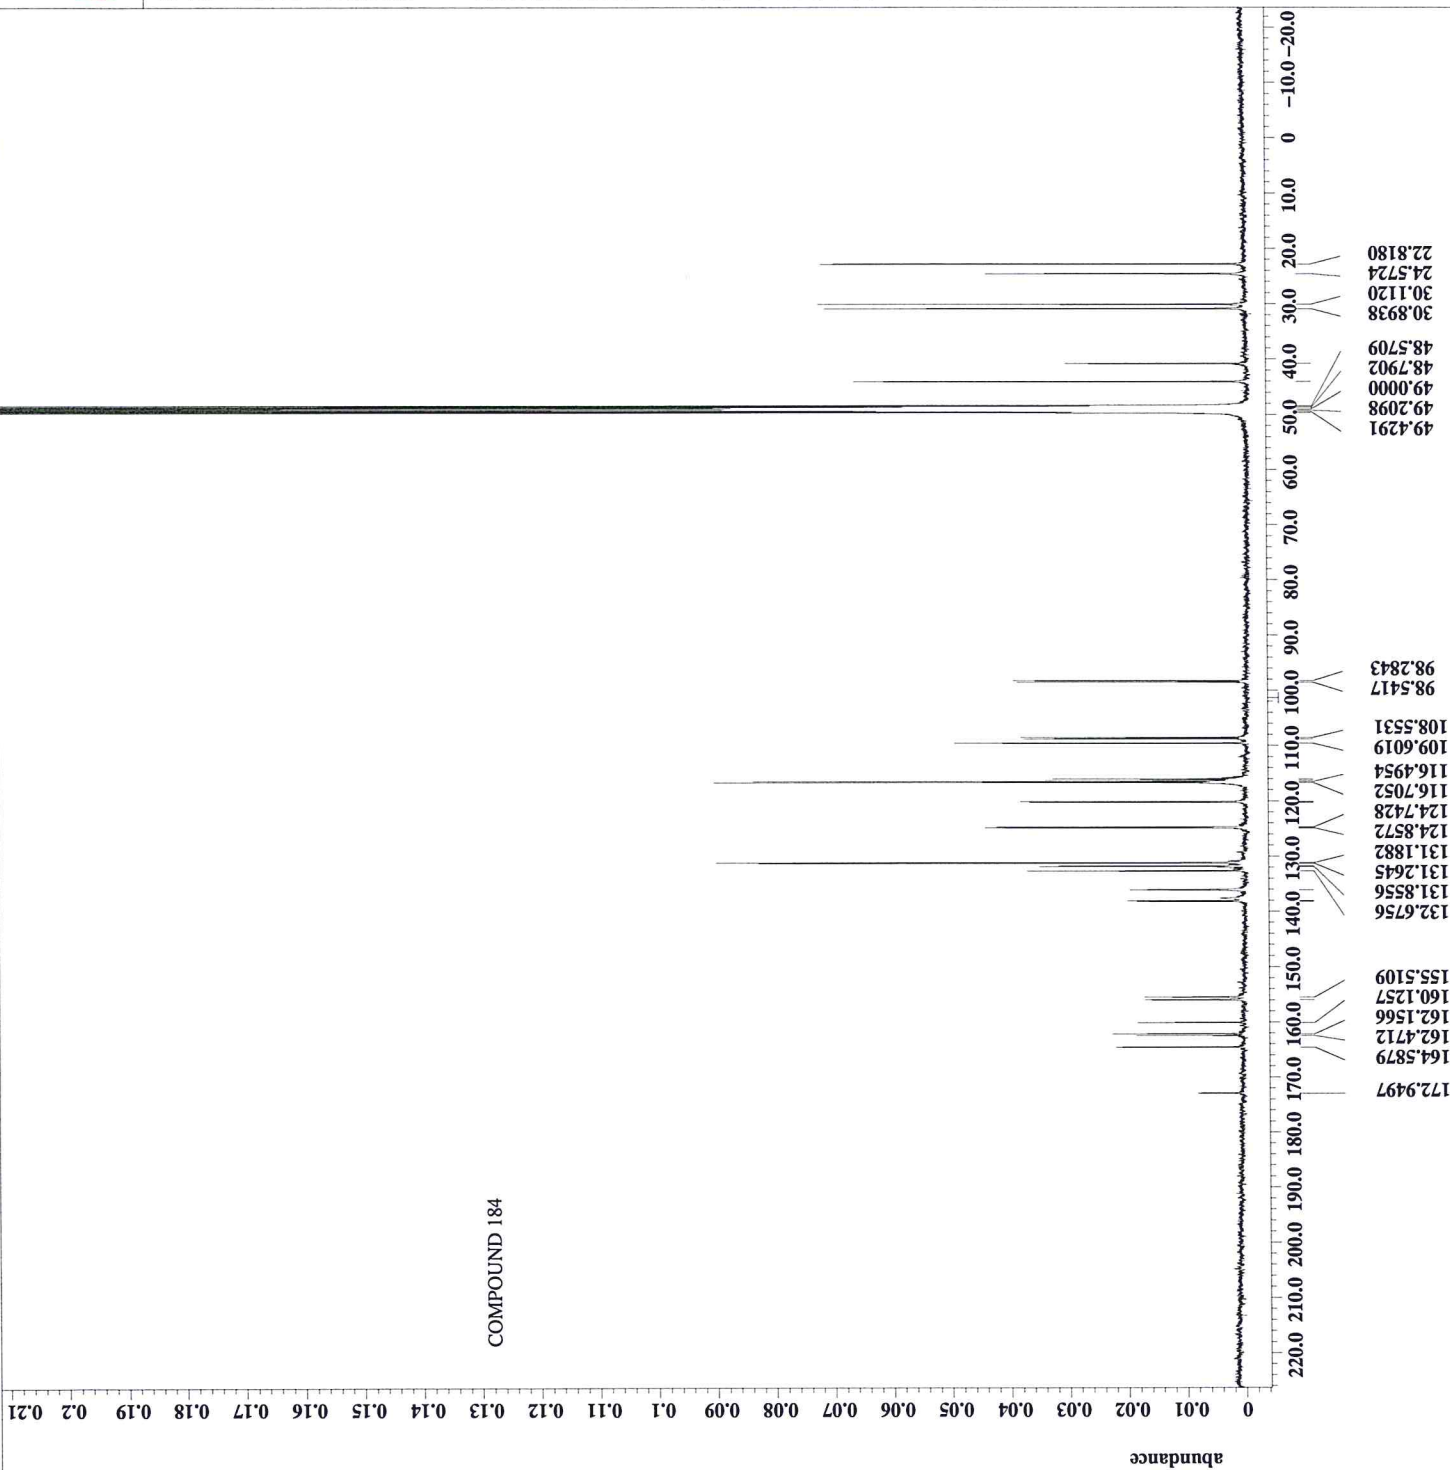

X : parts per Million : 13C

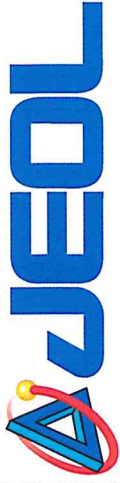

File name = SK-I-55\_PROTON-4.jdf  
Author = Delta  
Experiment = single\_pulse.ex2  
Sample\_id = SK-I-55  
Solvent = METHANOL-D3  
Creation\_time = 2-JUN-2017 10:19:19  
Revision\_time = 12-MAR-2021 11:21:27  
Current\_time = 12-MAR-2021 11:21:31  
Data\_format = 1D\_COMPLEX  
Dim\_size = 13107  
Dim\_title = 1H  
Dim\_units = [ppm]  
Dimensions = X  
Site = ECS 400  
Spectrometer = JNM-ECS400  
Field\_strength = 9.389766[T] (400[MHz])  
X\_acq\_duration = 2.18365952[s]  
X\_domain = 1H  
X\_freq = 399.78219838[MHz]  
X\_offset = 5[ppm]  
X\_points = 16384  
X\_prescans = 1  
X\_resolution = 0.45794685[Hz]  
X\_sweep = 7.5030012[kHz]  
Irr\_domain = 1H  
Irr\_freq = 399.78219838[MHz]  
Irr\_offset = 5[ppm]  
Tri\_domain = 1H  
Tri\_freq = 399.78219838[MHz]  
Tri\_offset = 5[ppm]  
Clipped = FALSE  
Mod\_return = 1  
Scans = 16  
total\_scans = 16  
X\_90\_width = 10.68[us]  
X\_acq\_time = 2.18365952[s]  
X\_angle = 45[deg]  
X\_atn = 6[db]  
X\_pulse = 5.34[us]  
Irr\_mode = Off  
Tri\_mode = Off  
Dante\_presat = FALSE  
Initial\_wait = 1[s]  
Recvr\_gain = 48  
Relaxation\_delay = 4[s]  
Repetition\_time = 6.18365952[s]  
temp\_get = 460.0[dc]

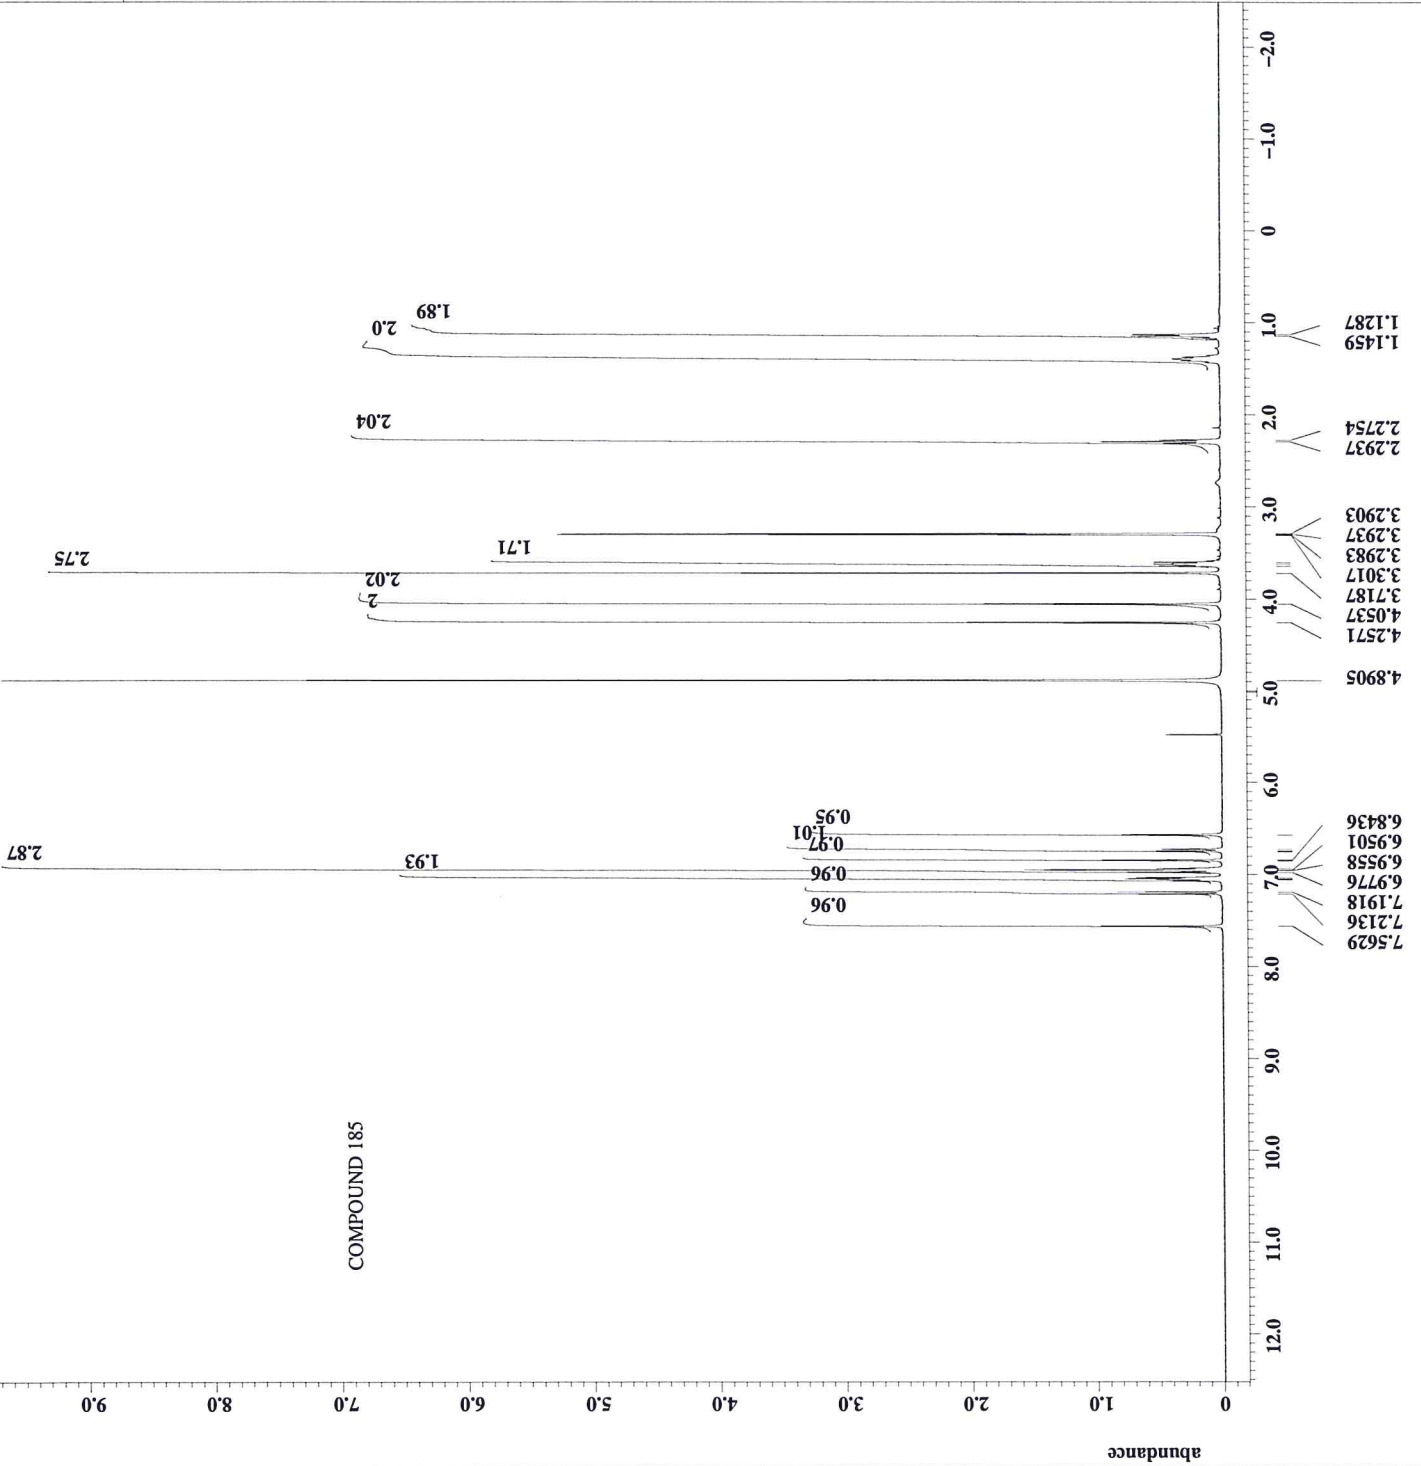

X : parts per Million : 1H



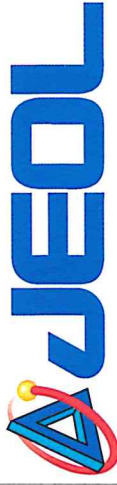

File name = SK-I-55\_weekend\_CARBO  
Author = Delta  
Experiment = single\_pulse\_dec  
Sample\_id = SK-I-55\_weekend  
Solvent = METHANOL-D3  
Creation time = 12-JUN-2017 08:21:07  
Revision time = 12-MAR-2021 11:23:36  
Current\_time = 12-MAR-2021 11:23:40  
Data\_format = 1D COMPLEX  
Dim\_size = 26214  
Dim\_title = 13C  
Dim\_units = [ppm]  
Dimensions = X  
Site = ECS 400  
Spectrometer = JNM-ECS400  
Field\_strength = 9.389766[T] (400 [MHz])  
X\_acq\_duration = 1.04333312[s]  
X\_domain = 13C  
X\_freq = 100.52530333 [MHz]  
X\_offset = 100 [ppm]  
X\_points = 32768  
X\_prescans = 4  
X\_resolution = 0.95846665 [Hz]  
X\_sweep = 31.40703518 [kHz]  
Irr\_domain = 1H  
Irr\_freq = 399.78219838 [MHz]  
Irr\_offset = 5 [ppm]  
Clipped = FALSE  
Mod\_return = 1  
Total\_scans = 72275  
X\_90\_width = 12.84 [us]  
X\_acq\_time = 1.04333312 [s]  
X\_angle = 30 [deg]  
X\_atn = 9 [dB]  
X\_pulse = 4.28 [us]  
Irr\_atn\_dec = 27 [dB]  
Irr\_atn\_noe = 27 [dB]  
Irr\_noise = WALTZ  
Decoupling = TRUE  
Initial\_wait = 1 [s]  
Noe = TRUE  
Noe\_time = 2 [s]  
Recvr\_gain = 60  
Relaxation\_delay = 2 [s]  
Repetition\_time = 3.04333312 [s]  
Temp\_get = 460.0 [dC]

COMPOUND 185

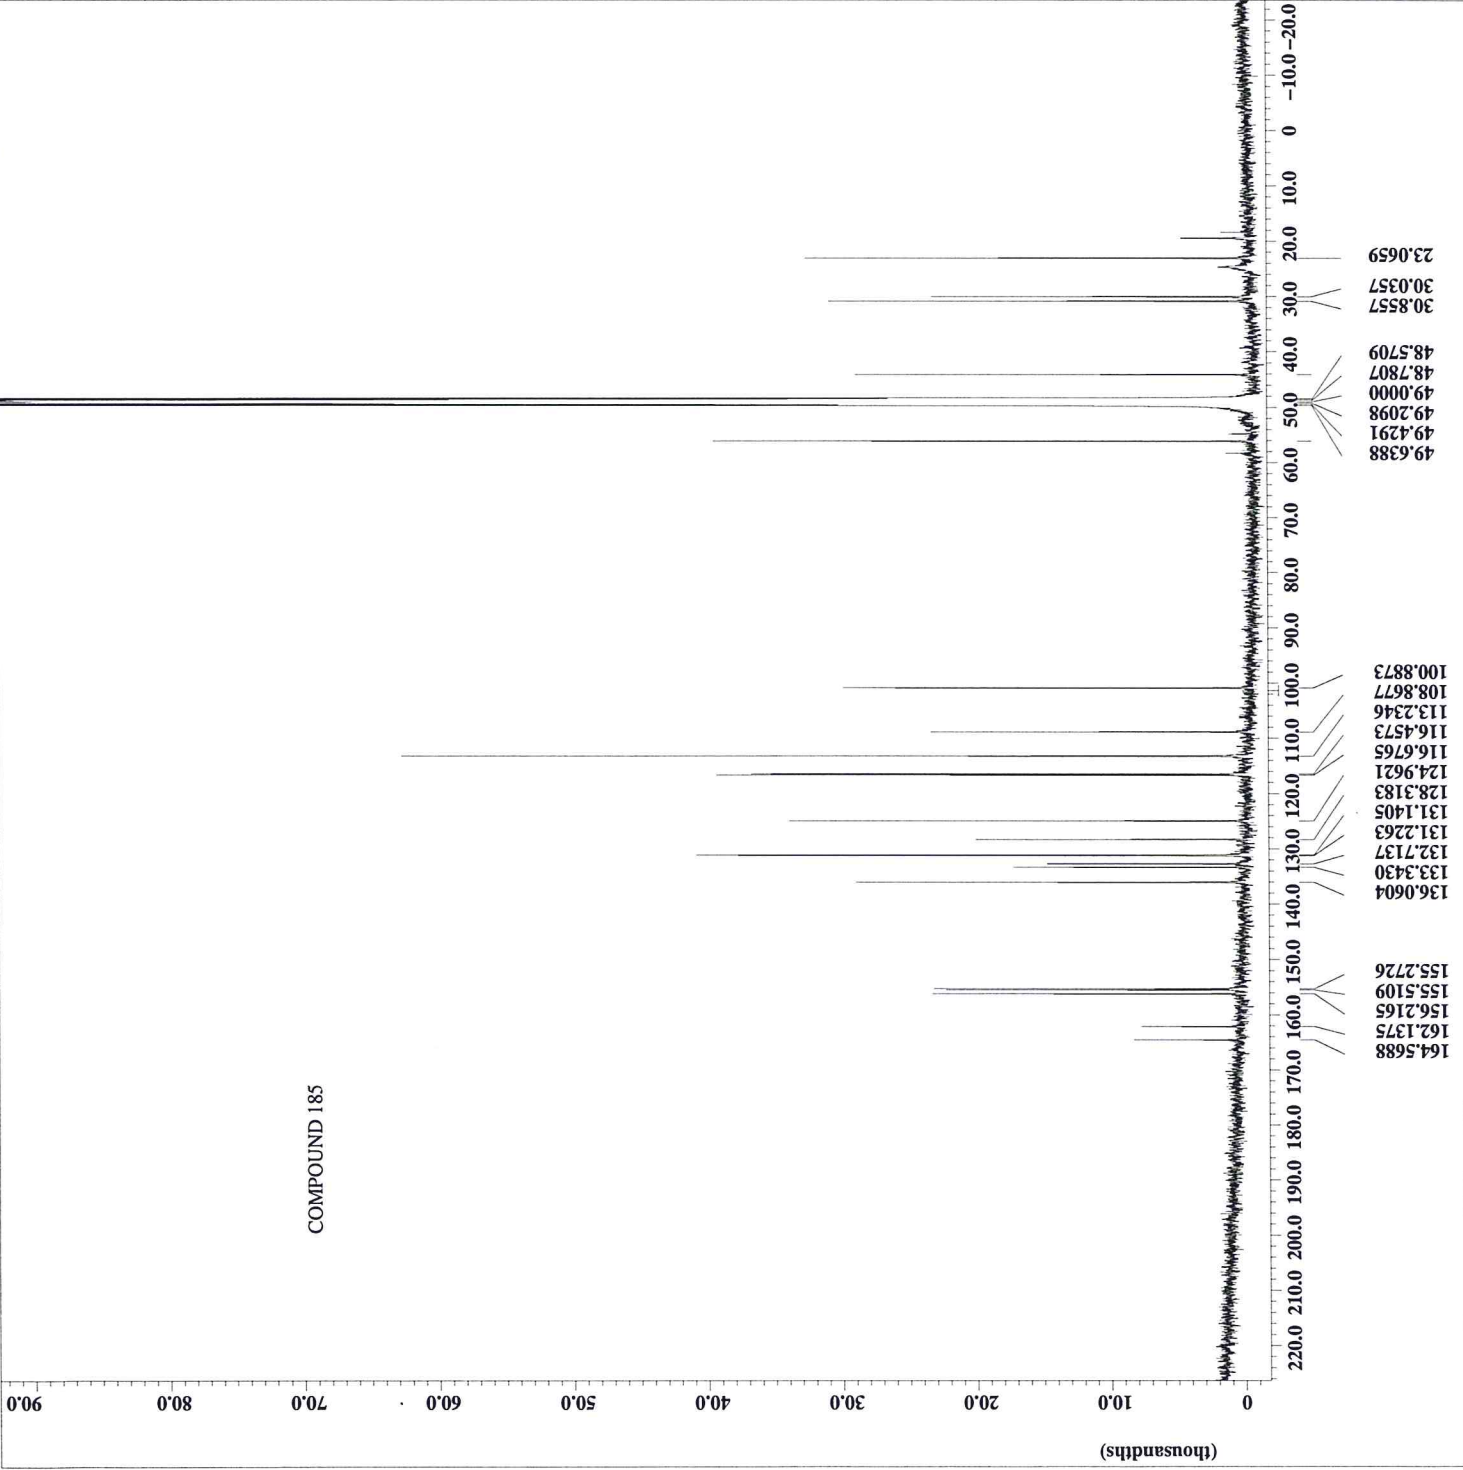

X : parts per Million : 13C

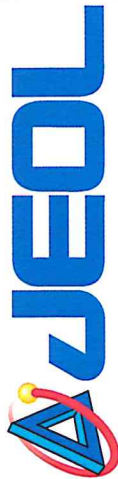

Filename = KS-I-15-C\_PROTON-7.jd  
Author = Delta  
Experiment = single\_pulse.ex2  
Sample\_id = KS-I-15-C  
Solvent = METHANOL-D3  
Creation\_time = 14-FEB-2019 13:23:52  
Revision\_time = 11-MAR-2021 11:04:33  
Current\_time = 11-MAR-2021 11:04:37  
Data\_format = 1D COMPLEX  
Dim\_size = 13107  
Dim\_title = 1H  
Dim\_units = [ppm]  
Dimensions = X  
Site = ECS 400  
Spectrometer = JNM-ECS400  
Field\_strength = 9.389766 [T] (400 [MHz])  
X\_acq\_duration = 2.18365952 [s]  
X\_domain = 1H  
X\_freq = 399.78219838 [MHz]  
X\_offset = 5 [ppm]  
X\_points = 16384  
X\_prescans = 1  
X\_resolution = 0.45794685 [Hz]  
X\_sweep = 7.5030012 [kHz]  
Irr\_domain = 1H  
Irr\_freq = 399.78219838 [MHz]  
Irr\_offset = 5 [ppm]  
Tri\_domain = 1H  
Tri\_freq = 399.78219838 [MHz]  
Tri\_offset = 5 [ppm]  
Clipped = FALSE  
Mod\_return = 1  
Scans = 4  
Total\_scans = 4  
X\_90\_width = 11.365 [us]  
X\_acq\_time = 2.18365952 [s]  
X\_angle = 45 [deg]  
X\_atn = 6 [dB]  
X\_pulse = 5.6825 [us]  
Irr\_mode = Off  
Tri\_mode = Off  
Dante\_preset = FALSE  
Initial\_wait = 1 [s]  
Recvr\_gain = 46  
Relaxation\_delay = 4 [s]  
Repetition\_time = 6.18365952 [s]  
Temp\_get = 18 [DC]

COMPOUND 186

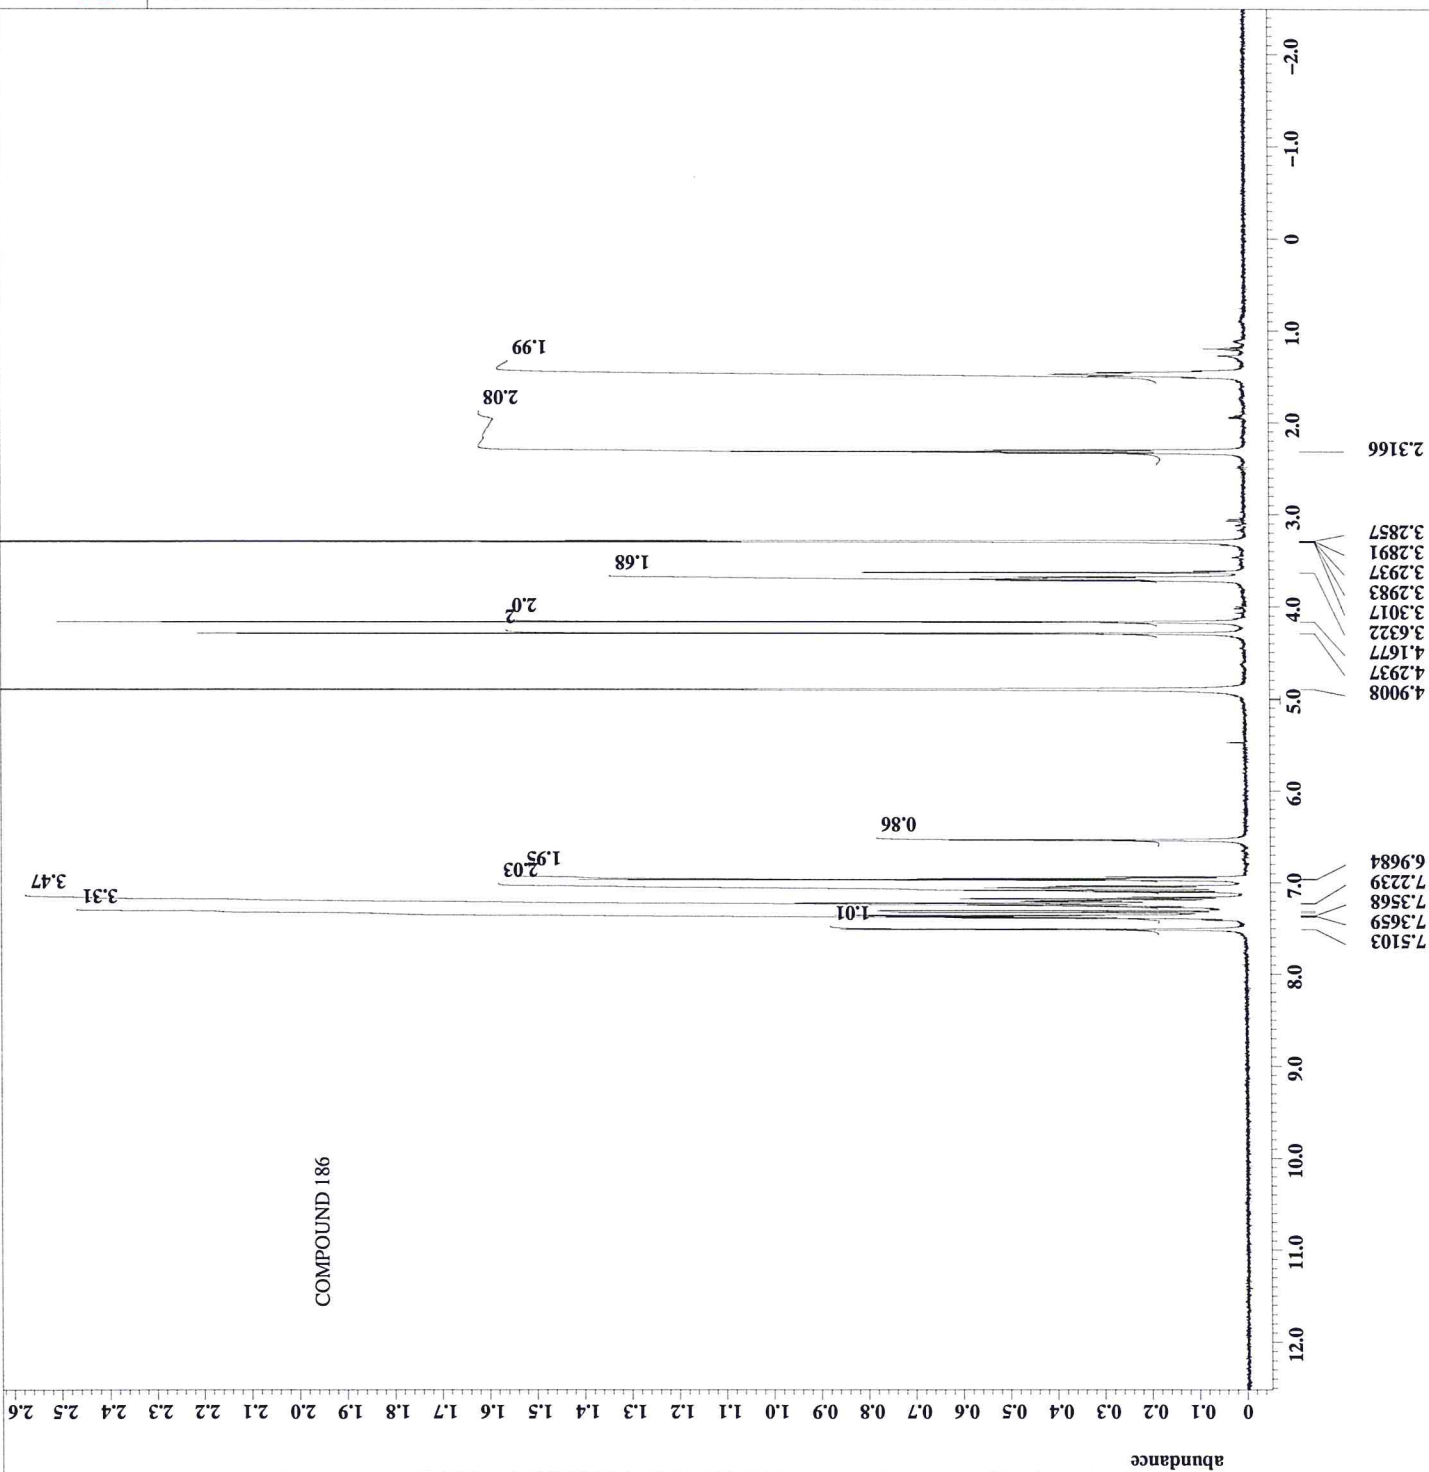

X : parts per Million : 1H

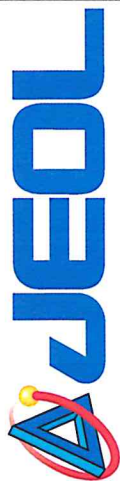

Filename = KS-I-15-C\_Long\_CARBON  
Author = Delta  
Experiment = single\_pulse\_dec  
Sample\_id = KS-I-15-C\_Long  
Solvent = METHANOL-D3  
Creation\_time = 15-FEB-2019 07:15:49  
Revision\_time = 11-MAR-2021 11:07:15  
Current\_time = 11-MAR-2021 11:07:18  
Data\_format = 1D COMPLEX  
Dim\_size = 26214  
Dim\_title = 13C  
Dim\_units = [ppm]  
Dimensions = X  
Site = ECS 400  
Spectrometer = JNM-ECS400  
Field\_strength = 9.389766 [T] (400 [MHz])  
X\_acq\_duration = 1.04333312 [s]  
X\_domain = 13C  
X\_freq = 100.52530333 [MHz]  
X\_offset = 100 [ppm]  
X\_points = 32768  
X\_prescans = 4  
X\_resolution = 0.95846665 [Hz]  
X\_sweep = 31.40703518 [kHz]  
Irr\_domain = 1H  
Irr\_freq = 399.78219838 [MHz]  
Irr\_offset = 5 [ppm]  
Clipped = FALSE  
Mod\_return = 1  
Scans = 14483  
Total\_scans = 14483  
X\_90\_width = 10.4 [us]  
X\_acq\_time = 1.04333312 [s]  
X\_angle = 30 [deg]  
X\_atn = 9 [dB]  
X\_pulse = 3.46666667 [us]  
Irr\_atn\_dec = 24.2 [dB]  
Irr\_atn\_noe = 24.2 [dB]  
Irr\_noise = WAITZ  
Decoupling = TRUE  
Initial\_wait = 1 [s]  
Noe = TRUE  
Noe\_time = 3 [s]  
Recvr\_gain = 58  
Relaxation\_delay = 3 [s]  
Repetition\_time = 4.04333312 [s]  
Temp\_get = 17.8 [dC]

COMPOUND 186

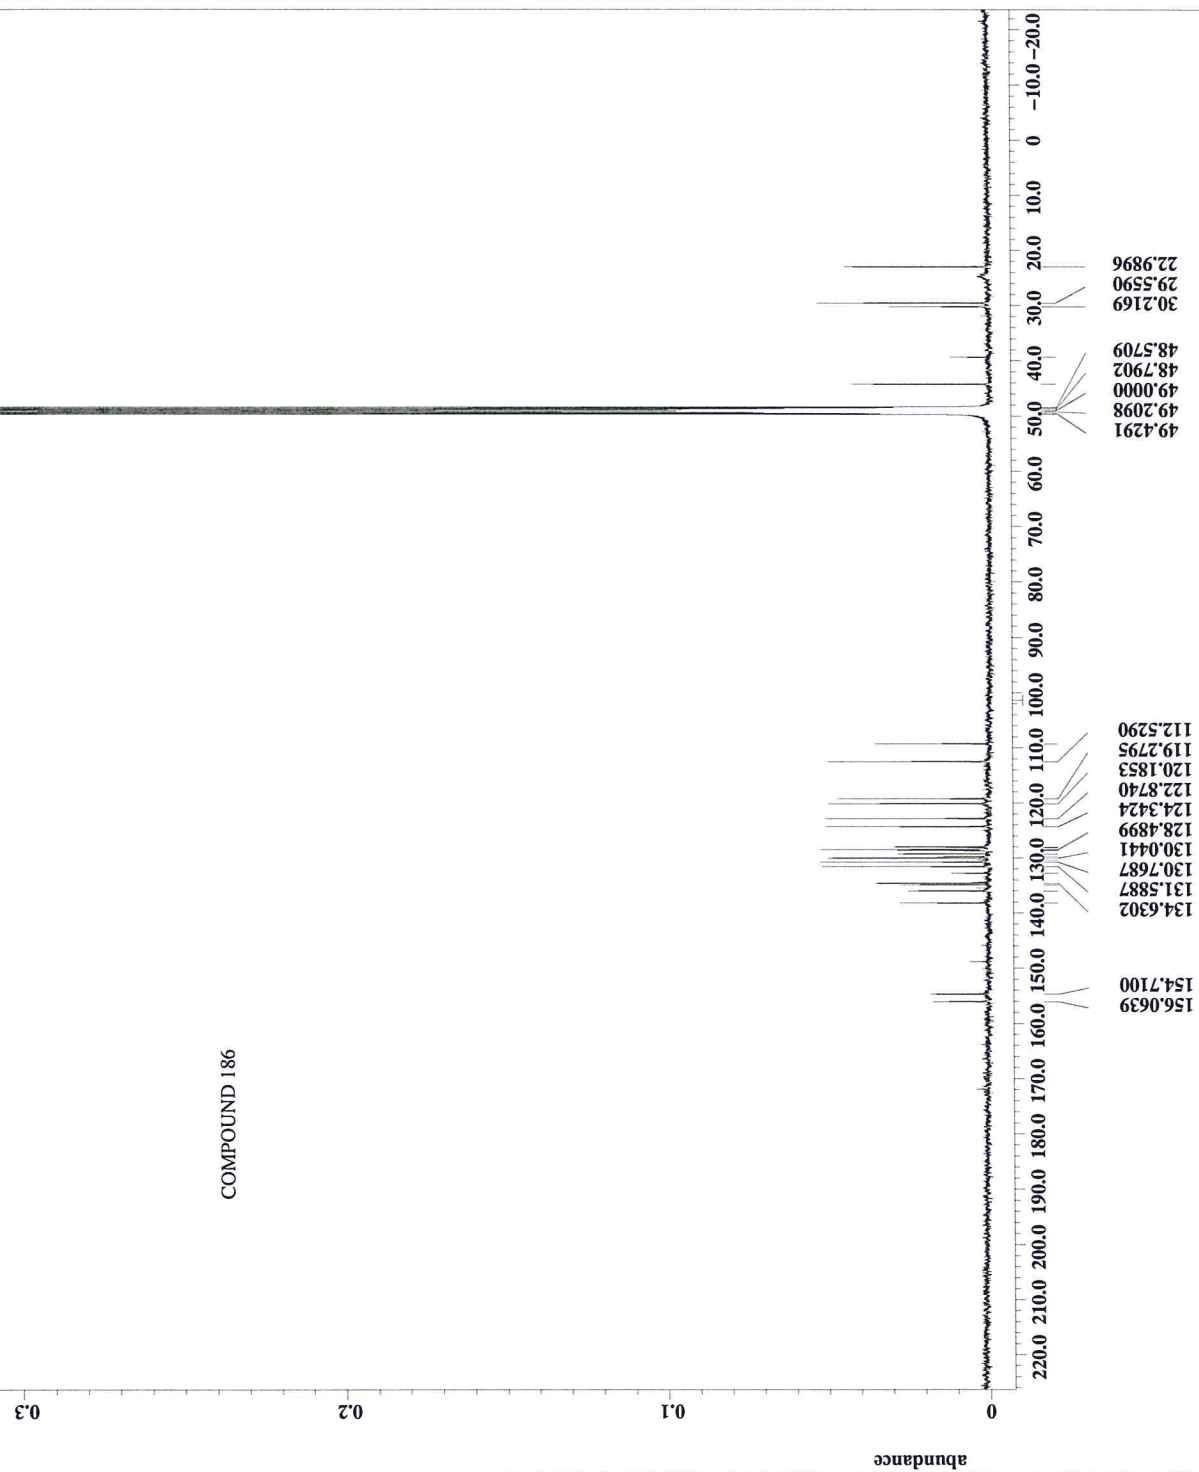

X : parts per Million : 13C

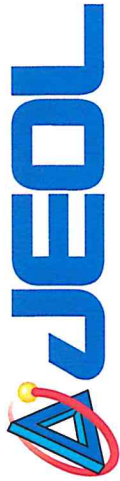

Filename = KS-I-8-C\_PROTON-5.jdf  
Author = Delta  
Experiment = single\_pulse.ex2  
Sample\_id = KS-I-8-C  
Solvent = DMSO-D6  
Creation\_time = 5-FEB-2019 12:03:30  
Revision\_time = 11-MAR-2021 11:13:18  
Current\_time = 11-MAR-2021 11:13:22  
Date\_format = 1D COMPLEX  
Dim\_size = 13107  
Dim\_title = 1H  
Dim\_units = [ppm]  
Dimensions = X  
Site = ECS 400  
Spectrometer = JNM-ECS400  
Field\_strength = 9.389766[T] (400 [MHz])  
X\_acq\_duration = 2.18365952[s]  
X\_domain = 1H  
X\_freq = 399.78219838 [MHz]  
X\_offset = 5 [ppm]  
X\_points = 16384  
X\_prescans = 1  
X\_resolution = 0.45794685 [Hz]  
X\_sweep = 7.5030012 [kHz]  
Irr\_domain = 1H  
Irr\_freq = 399.78219838 [MHz]  
Irr\_offset = 5 [ppm]  
Tri\_domain = 1H  
Tri\_freq = 399.78219838 [MHz]  
Tri\_offset = 5 [ppm]  
Clipped = FALSE  
Mod\_return = 1  
Scans = 4  
Total\_scans = 4  
X\_90\_width = 11.365 [us]  
X\_acq\_time = 2.18365952 [s]  
X\_angle = 45 [deg]  
X\_atn = 6 [dB]  
X\_pulse = 5.6825 [us]  
Irr\_mode = Off  
Dante\_presat = FALSE  
Initial\_wait = 1 [s]  
Recvr\_gain = 44  
Relaxation\_delay = 4 [s]  
Repetition\_time = 6.18365952 [s]  
Temp\_get = 25 [dC]

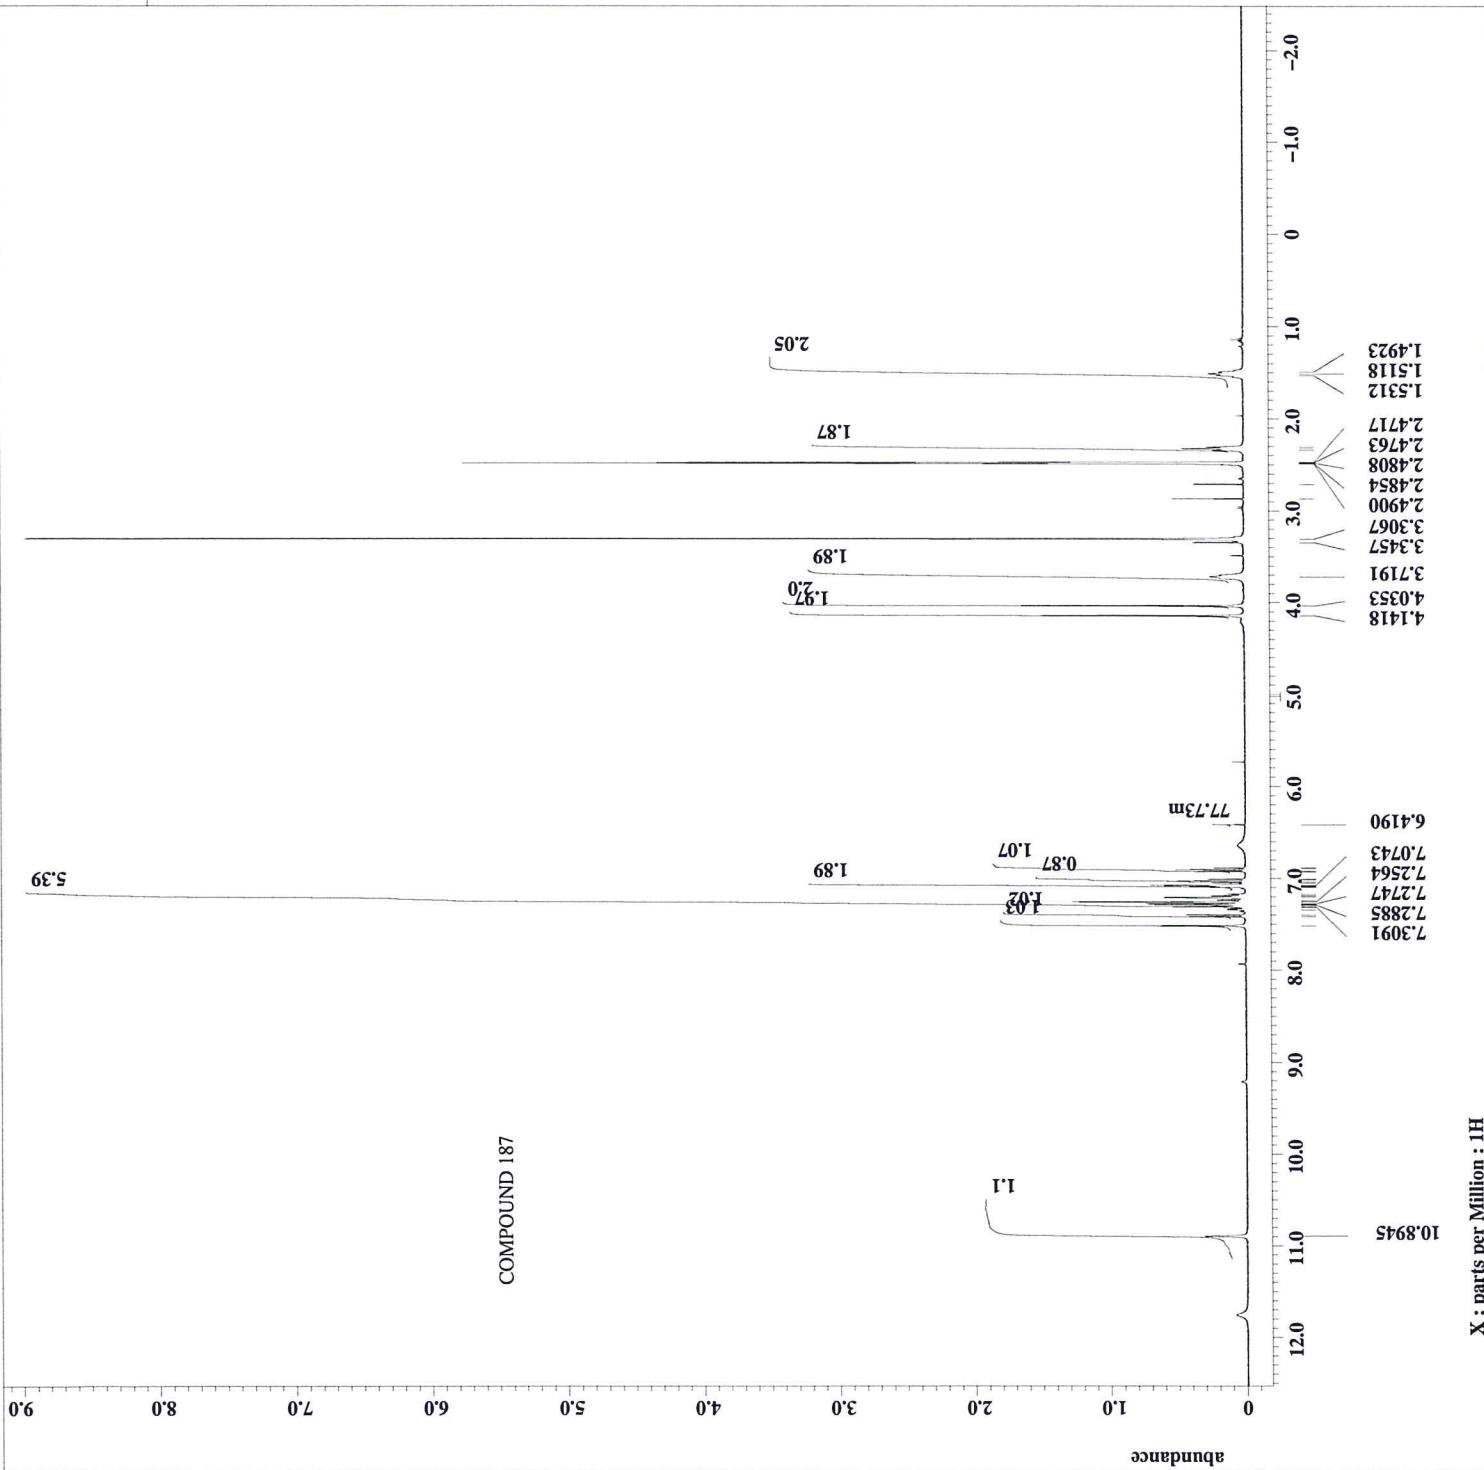



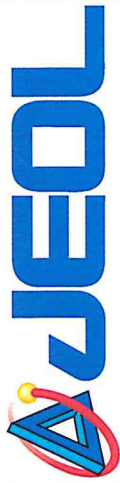

Filename = KS-I-8-C\_CARBON-7.jdf  
Author = Delta  
Experiment = single\_pulse\_dec  
Sample\_id = KS-I-8-C  
Solvent = DMSO-D6  
Creation\_time = 5-FER-2019 14:38:58  
Revision\_time = 11-MAR-2021 11:17:22  
Current\_time = 11-MAR-2021 11:17:26  
Data\_format = 1D COMPLEX  
Dim\_size = 26214  
Dim\_title = 13C  
Dim\_units = [ppm]  
Dimensions = X  
Site = ECS 400  
Spectrometer = JNM-ECS400  
Field\_strength = 9.389766[T] (400 [MHz])  
X\_acq\_duration = 1.04333312[s]  
X\_domain = 13C  
X\_freq = 100.52530333 [MHz]  
X\_offset = 100 [ppm]  
X\_points = 32768  
X\_prescans = 4  
X\_resolution = 0.95846665 [Hz]  
X\_sweep = 31.40703518 [kHz]  
Irr\_domain = 1H  
Irr\_freq = 399.78219838 [MHz]  
Irr\_offset = 5 [ppm]  
Clipped = FALSE  
Mod\_return = 1  
Scans = 2952  
Total\_scans = 2952  
X\_90\_width = 10.4 [us]  
X\_acq\_time = 1.04333312 [s]  
X\_angle = 30 [deg]  
X\_atn = 9 [dB]  
X\_pulse = 3.46666667 [us]  
Irr\_atn\_dec = 24.2 [dB]  
Irr\_atn\_noe = 24.2 [dB]  
Irr\_noise = WALTZ  
Decoupling = TRUE  
Initial\_wait = 1 [s]  
Noe = TRUE  
Noe\_time = 2 [s]  
Recvr\_gain = 58  
Relaxation\_delay = 2 [s]  
Repetition\_time = 3.04333312 [s]  
Temp\_get = 25 [dC]

COMPOUND 187

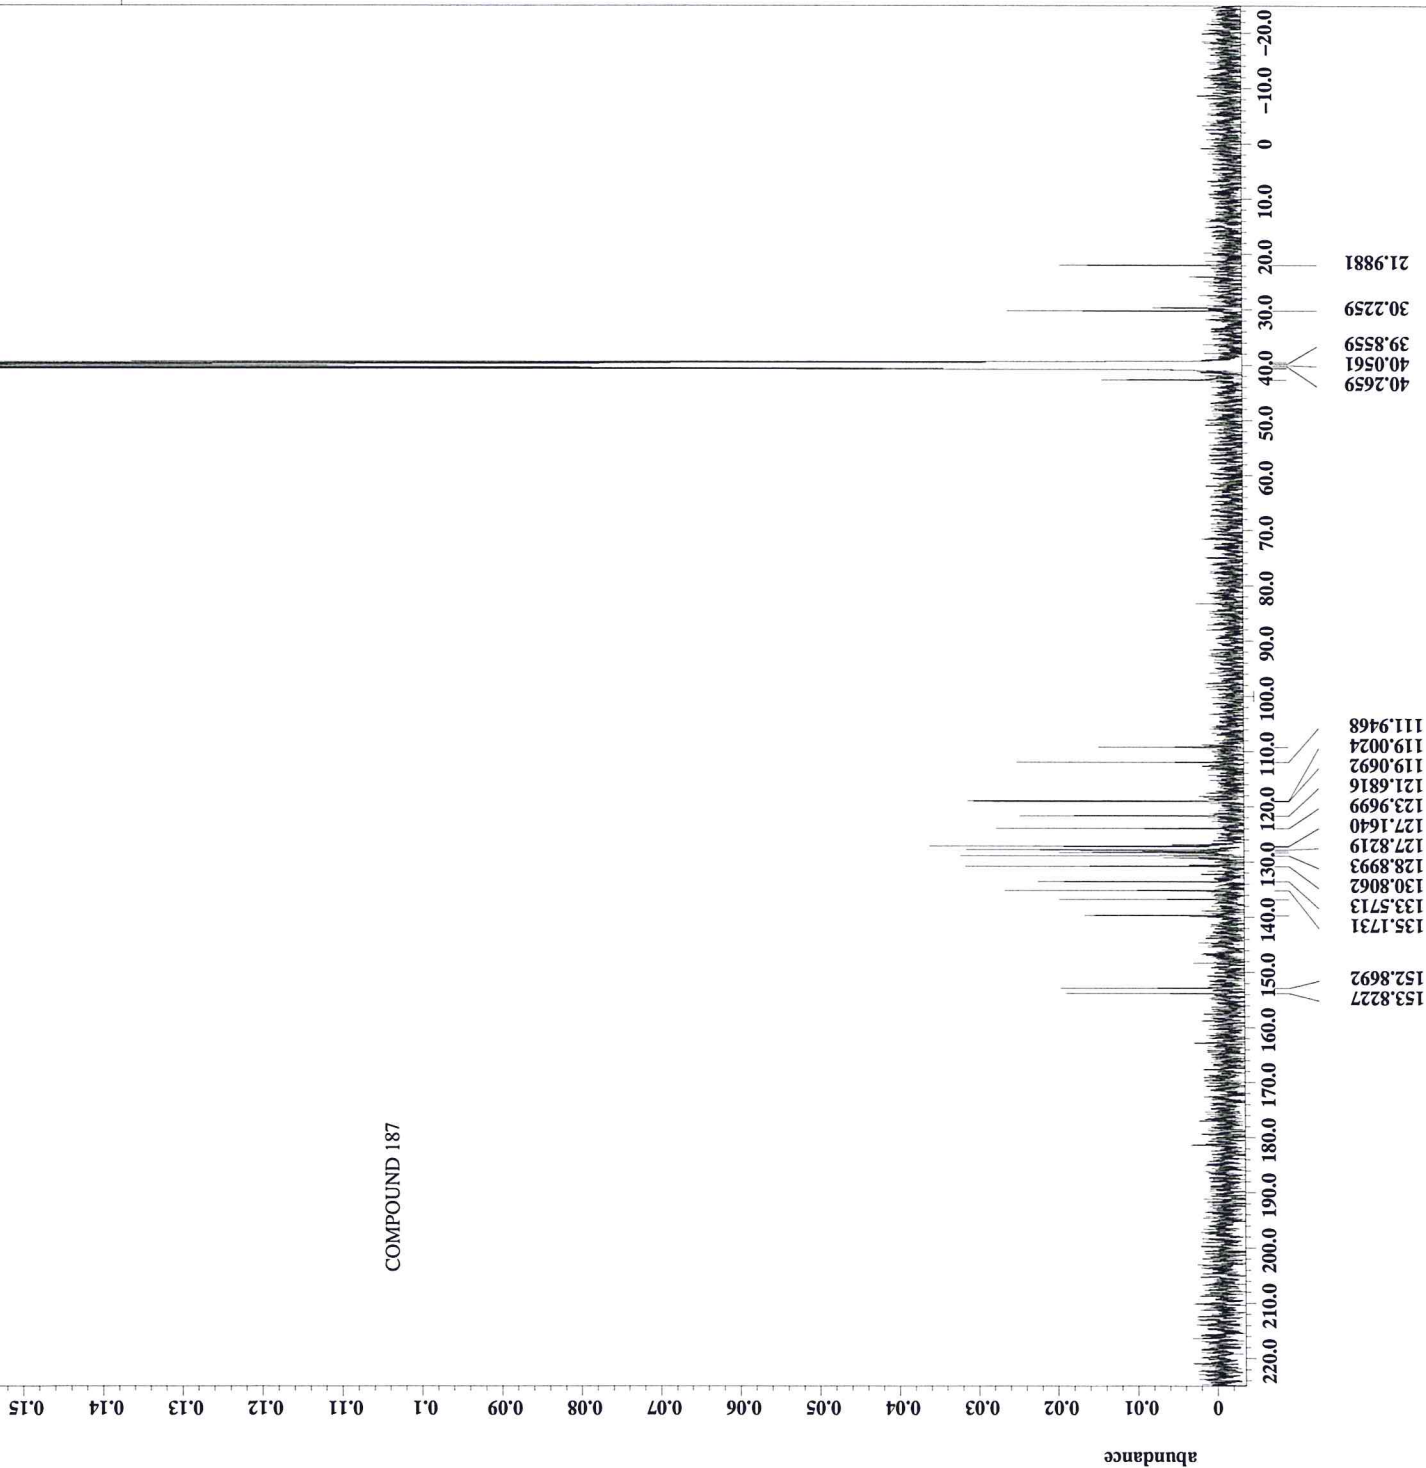

X : parts per Million : 13C

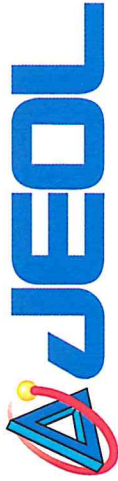

```

Filename = KS-I-57-C_PROTON-5.jd
Author = Delta
Experiment = single_pulse.ex2
Sample_id = KS-I-57-C
Solvent = DMSO-D6
Creation_time = 21-JUL-2019 11:06:26
Revision_time = 15-MAR-2021 15:47:50
Current_time = 15-MAR-2021 15:47:55

Data_format = 1D COMPLEX
Dim_size = 13107
Dim_title = 1H
Dim_units = [ppm]
Dimensions = X
Site = ECS 400
Spectrometer = JNM-ECS400

Field_strength = 9.389766[T] (400[MHz])
X_acq_duration = 2.18365952[s]
X_domain = 1H
X_freq = 399.78219838[MHz]
X_offset = 5[ppm]
X_points = 16384
X_prescans = 1
X_resolution = 0.45794685[Hz]
X_sweep = 7.5030012[kHz]
Irr_domain = 1H
Irr_freq = 399.78219838[MHz]
Irr_offset = 5[ppm]
Tri_domain = 1H
Tri_freq = 399.78219838[MHz]
Tri_offset = 5[ppm]
Clipped = FALSE
Mod_return = 1
Scans = 4
Total_scans = 4

X_90_width = 11.365[us]
X_acq_time = 2.18365952[s]
X_angle = 45[deg]
X_atn = 6[dB]
X_pulse = 5.6825[us]
Irr_mode = Off
Tri_mode = Off
Dante_preset = FALSE
Initial_wait = 1[s]
Recvr_gain = 46
Relaxation_delay = 4[s]
Repetition_time = 6.18365952[s]
Temp_get = 19.2[dc]

```

18.12

COMPOUND 188

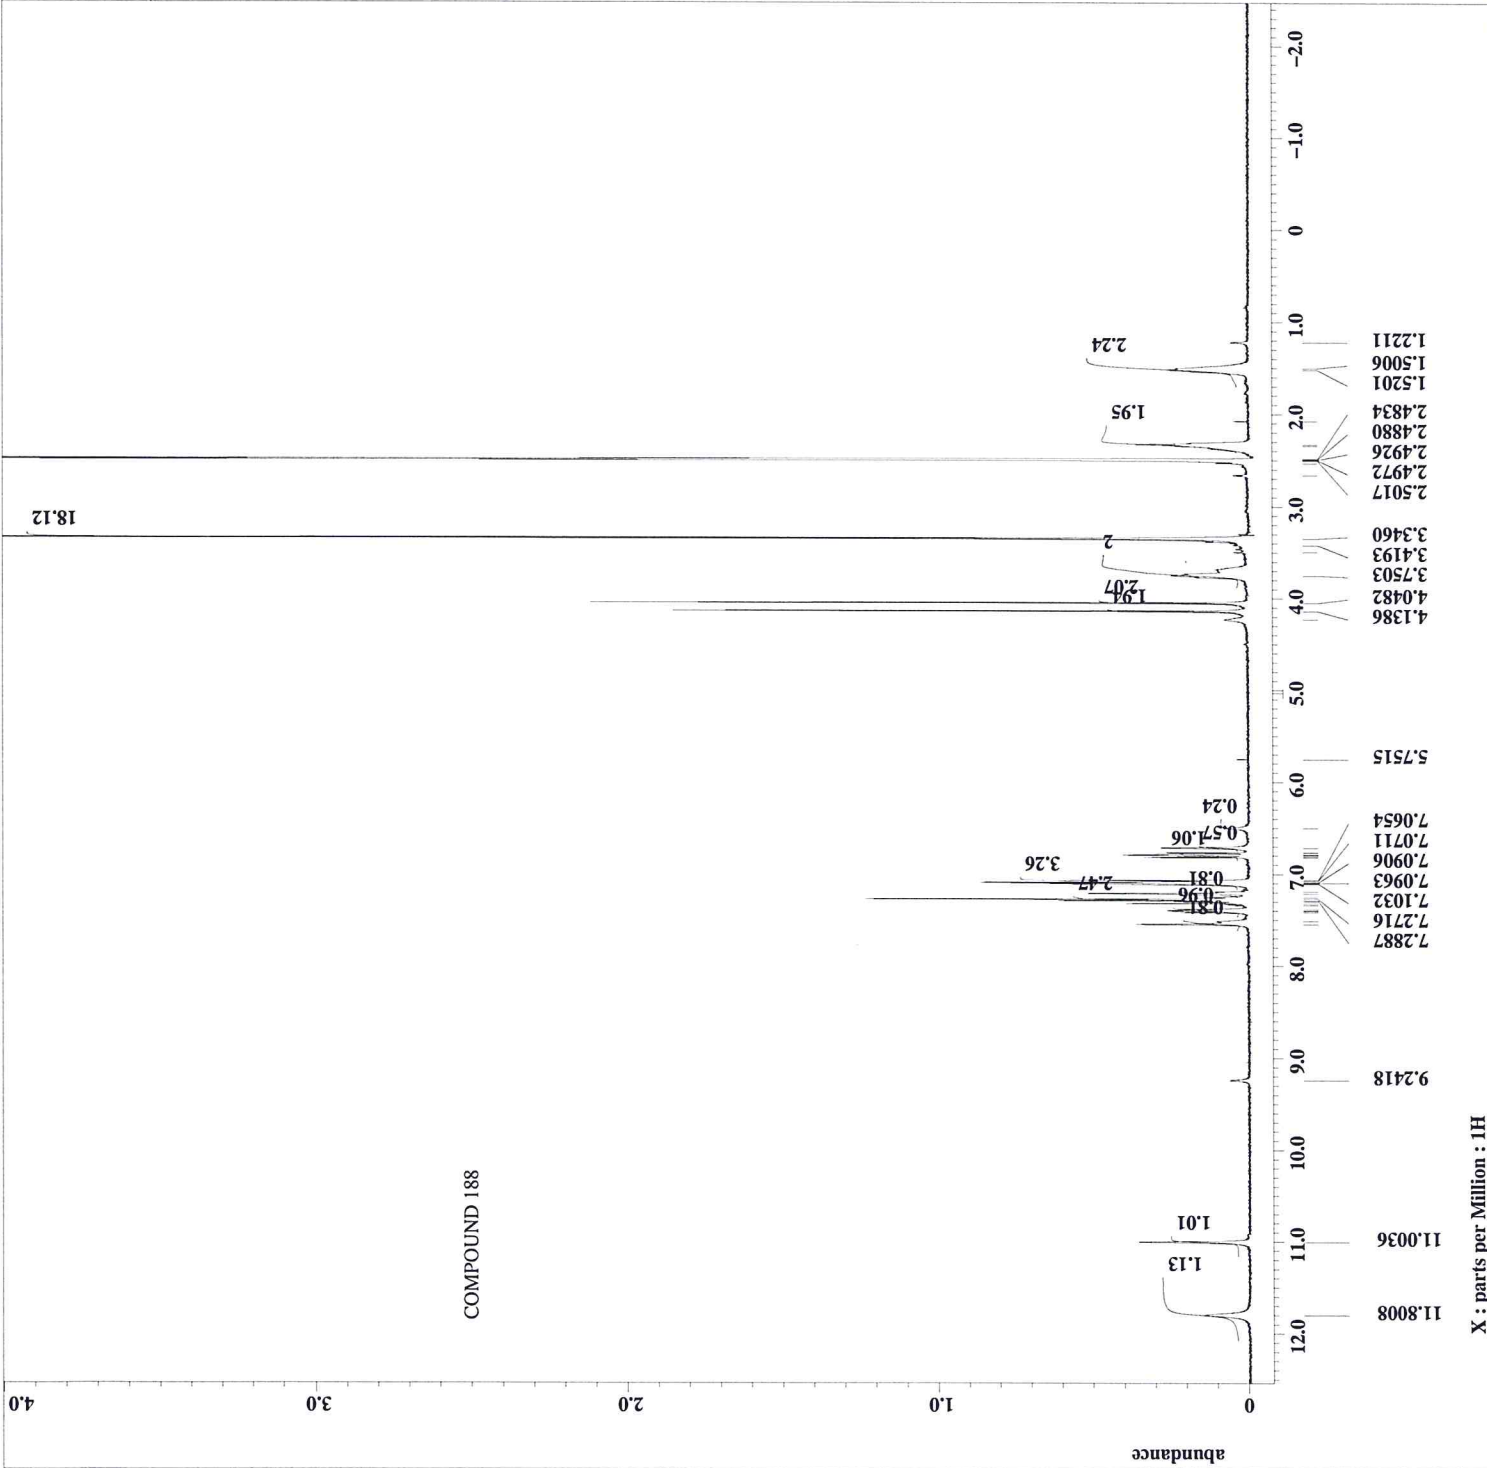

X : parts per Million : 1H

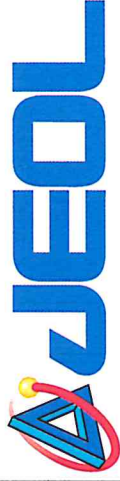

File name = KS-I-57-C-CARBON-5.jd  
Author = Delta  
Experiment = single\_pulse\_dec  
Sample\_id = KS-I-57-C  
Solvent = DMSO-D6  
Creation time = 22-JUL-2019 09:00:51  
Revision time = 15-MAR-2021 15:52:55  
Current time = 15-MAR-2021 15:52:59

Data format = 1D COMPLEX  
Dim\_size = 26214  
Dim\_title = 13C  
Dim\_units = [ppm]  
Dimensions = X  
Site = ECS 400  
Spectrometer = JNM-ECS400

Field strength = 9.389766[T] (400 [MHz])  
X\_acq\_duration = 1.04333312[s]  
X\_domain = 13C  
X\_freq = 100.52530333 [MHz]  
X\_offset = 100 [ppm]  
X\_points = 32768  
X\_prescans = 4  
X\_resolution = 0.95846665 [Hz]  
X\_sweep = 31.40703518 [kHz]  
Irr\_domain = 1H  
Irr\_freq = 399.78219838 [MHz]  
Irr\_offset = 5 [ppm]  
Clipped = FALSE  
Mod\_return = 1  
Scans = 25848  
Total\_scans = 25848

X\_90\_width = 10.4 [us]  
X\_acq\_time = 1.04333312 [s]  
X\_angle = 30 [deg]  
X\_atn = 9 [dB]  
X\_pulse = 3.46666667 [us]  
Irr\_atn\_dec = 24.2 [dB]  
Irr\_atn\_noe = 24.2 [dB]  
Irr\_noise = WALTZ  
Decoupling = TRUE  
Initial\_wait = 1 [s]  
Noe = TRUE  
Noe\_time = 2 [s]  
Recvr\_gain = 60  
Relaxation\_delay = 2 [s]  
Repetition\_time = 3.04333312 [s]  
Temp\_get = 20.6 [dC]

COMPOUND 188

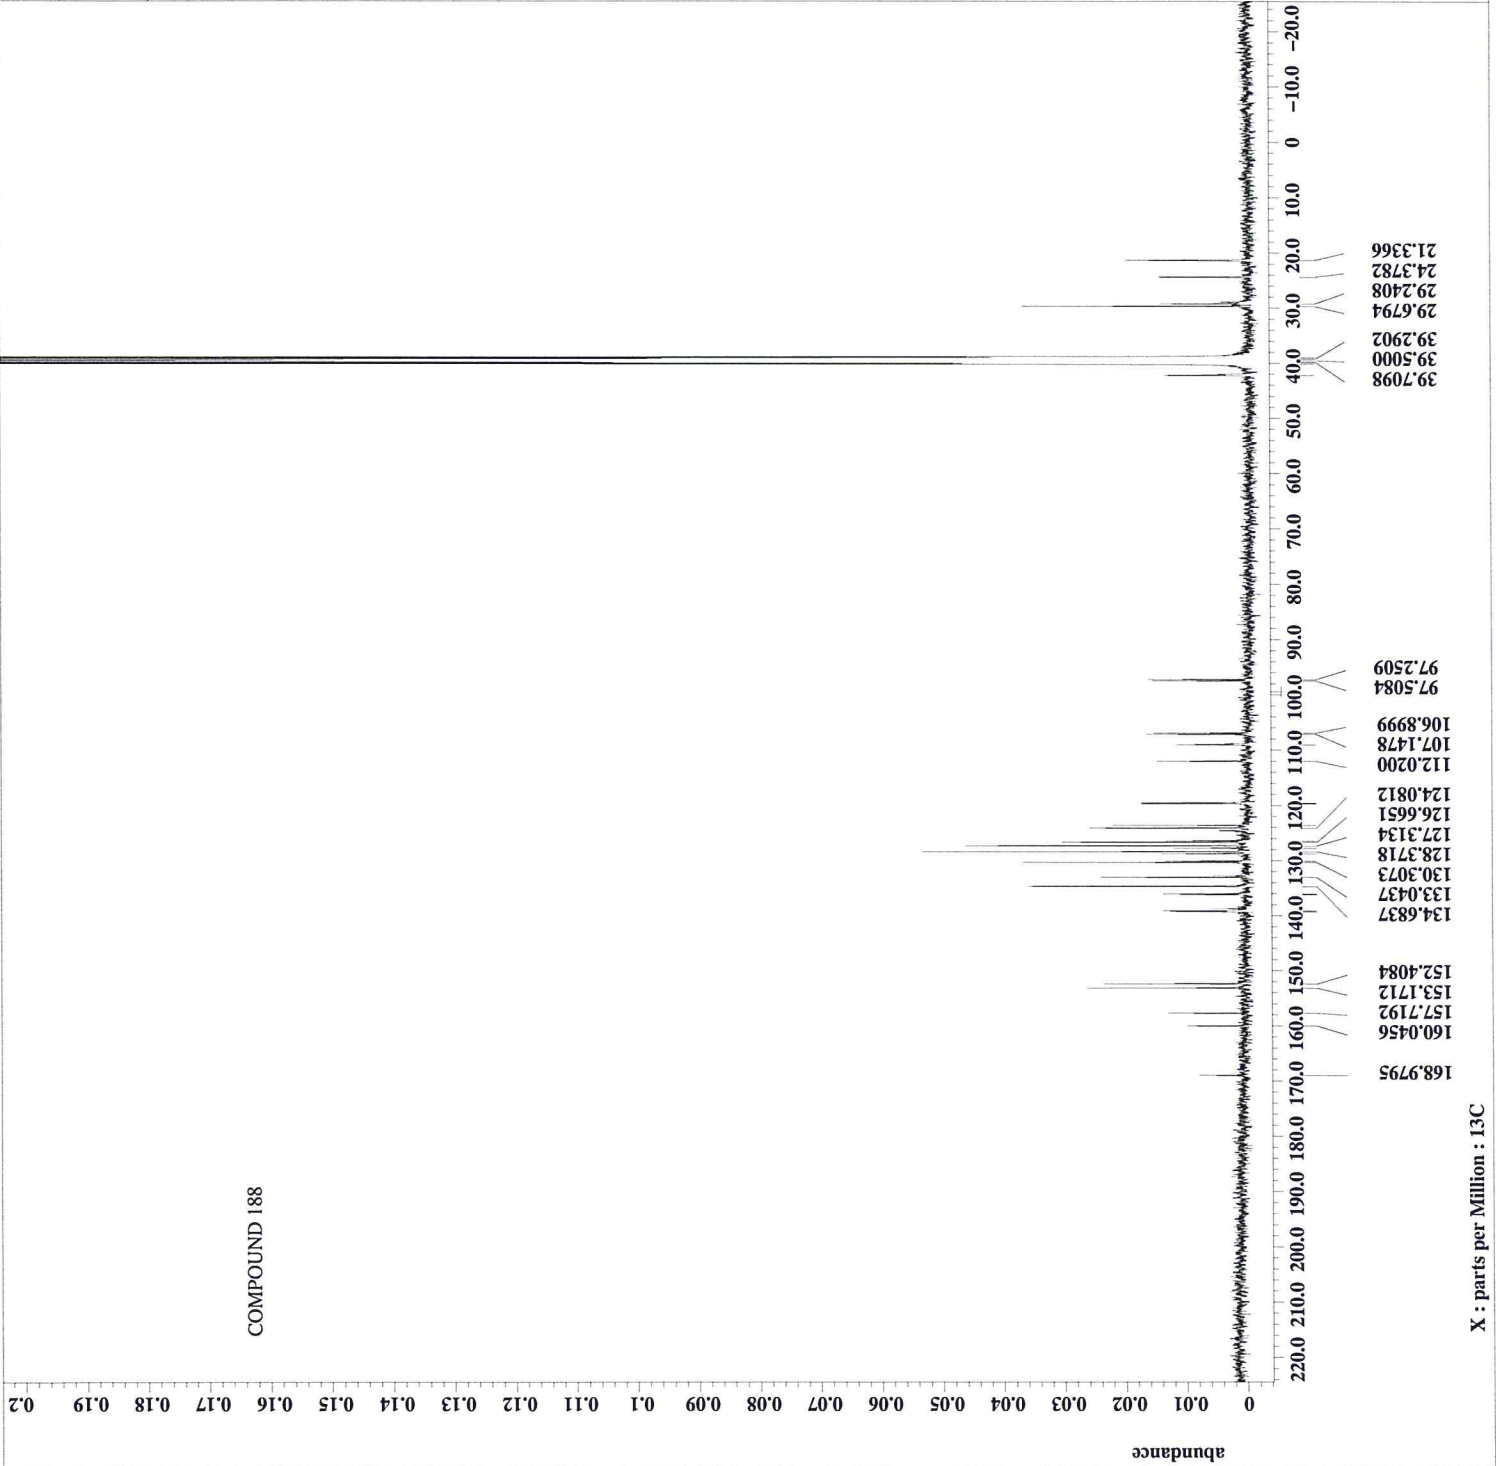

X : parts per Million : 13C

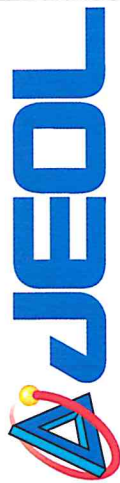

```

Filename = SK-I-22_PROTON-4.jdf
Author = Delta
Experiment = single_pulse.ex2
Sample_id = SK-I-22
Solvent = METHANOL-D3
Creation_time = 8-MAR-2017 09:49:02
Revision_time = 11-MAR-2021 14:31:12
Current_time = 11-MAR-2021 14:31:16

Data_format = 1D COMPLEX
Dim_size = 13107
Dim_title = 1H
Dim_units = [ppm]
Dimensions = X
Site = ECS 400
Spectrometer = JNM-ECS400

Field_strength = 9.389766[T] (400 [MHz])
X_acq_duration = 2.18365952[s]
X_domain = 1H
X_freq = 399.78219838 [MHz]
X_offset = 5 [ppm]
X_points = 16384
X_prescans = 1
X_resolution = 0.45794685 [Hz]
X_sweep = 7.5030012 [kHz]
Irr_domain = 1H
Irr_freq = 399.78219838 [MHz]
Irr_offset = 5 [ppm]
Tri_domain = 1H
Tri_freq = 399.78219838 [MHz]
Tri_offset = 5 [ppm]
Clipped = FALSE
Mod_return = 1
Scans = 16
Total_scans = 16

X_90_width = 10.68 [us]
X_acq_time = 2.18365952 [s]
X_angle = 45 [deg]
X_atn = 6 [dB]
X_pulse = 5.34 [us]
Irr_mode = Off
Tri_mode = Off
Dante_presat = FALSE
Initial_wait = 1 [s]
Recvr_gain = 48
Relaxation_delay = 4 [s]
Repetition_time = 6.18365952 [s]
Temp_get = 460.0 [dC]
  
```

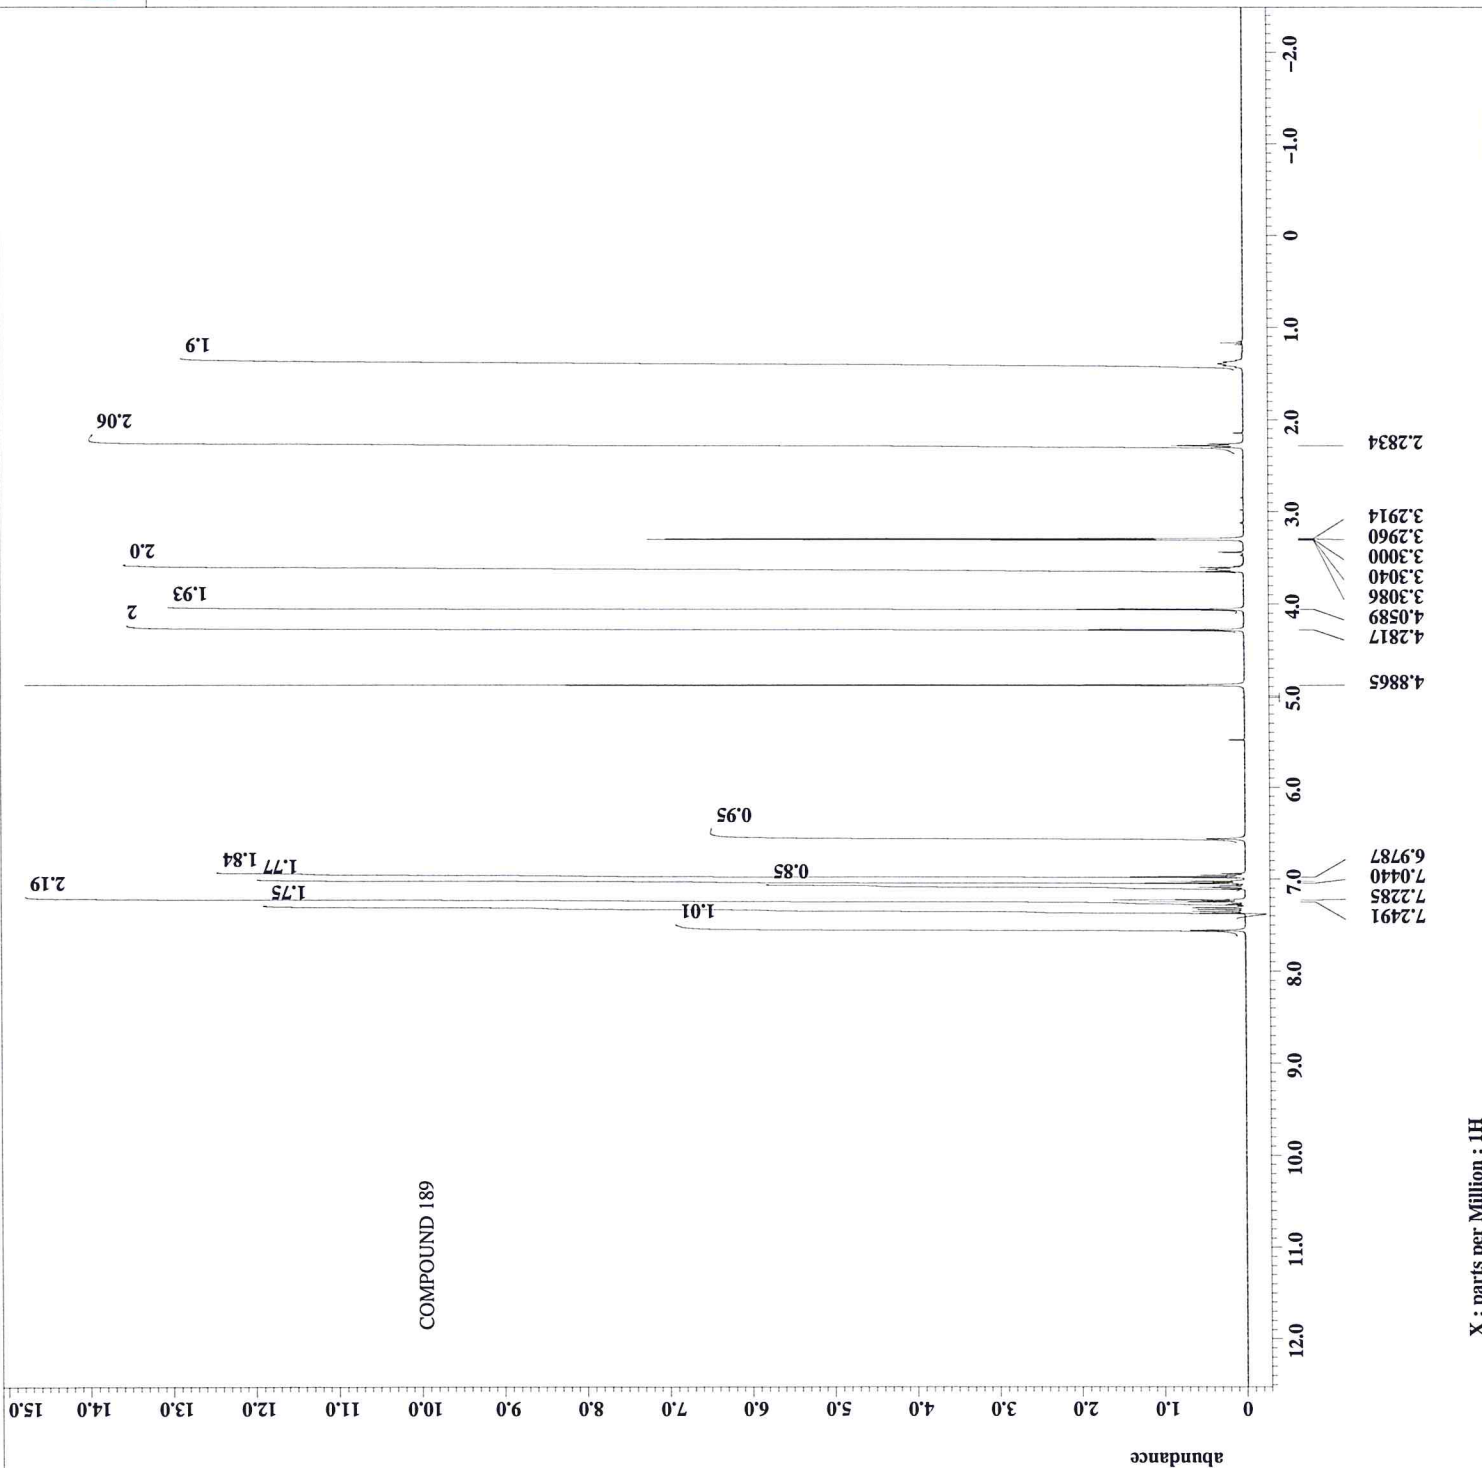

X : parts per Million : 1H



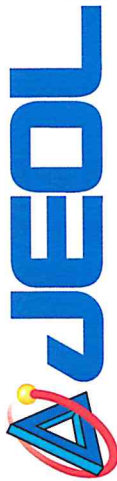

File name = SK-I-22\_CARBON-8-jdf  
Author = Delta  
Experiment = single\_pulse\_dec  
Sample\_id = SK-I-22  
Solvent = METHANOL-D3  
Creation time = 22-MAR-2017 02:30:26  
Revision time = 11-MAR-2021 14:33:31  
Current time = 11-MAR-2021 14:33:37  
Data format = 1D COMPLEX  
Dim\_size = 26214  
Dim\_title = 13C  
Dim\_units = [ppm]  
Dimensions = X  
Site = ECS 400  
Spectrometer = JNM-ECS400  
Field\_strength = 9.389766[T] (400 [MHz])  
X\_acq\_duration = 1.04333312[s]  
X\_domain = 13C  
X\_freq = 100.52530333 [MHz]  
X\_offset = 100 [ppm]  
X\_points = 32768  
X\_prescans = 4  
X\_resolution = 0.95946665 [Hz]  
X\_sweep = 31.40703518 [kHz]  
Irr\_domain = 1H  
Irr\_freq = 399.78219838 [MHz]  
Irr\_offset = 5 [ppm]  
Clipped = FALSE  
Mod\_return = 1  
Scans = 14000  
Total\_scans = 14000  
X\_90\_width = 12.84 [us]  
X\_acq\_time = 1.04333312 [s]  
X\_angle = 30 [deg]  
X\_atn = 9 [dB]  
X\_pulse = 4.28 [us]  
Irr\_atn\_dec = 27 [dB]  
Irr\_atn\_noe = 27 [dB]  
Irr\_noise = WALTZ  
Decoupling = TRUE  
Initial\_wait = 1 [s]  
Noe = TRUE  
Noe\_time = 2 [s]  
Recvr\_gain = 60  
Relaxation\_delay = 2 [s]  
Repetition\_time = 3.04333312 [s]  
Temp\_get = 27.6 [dC]

COMPOUND 189

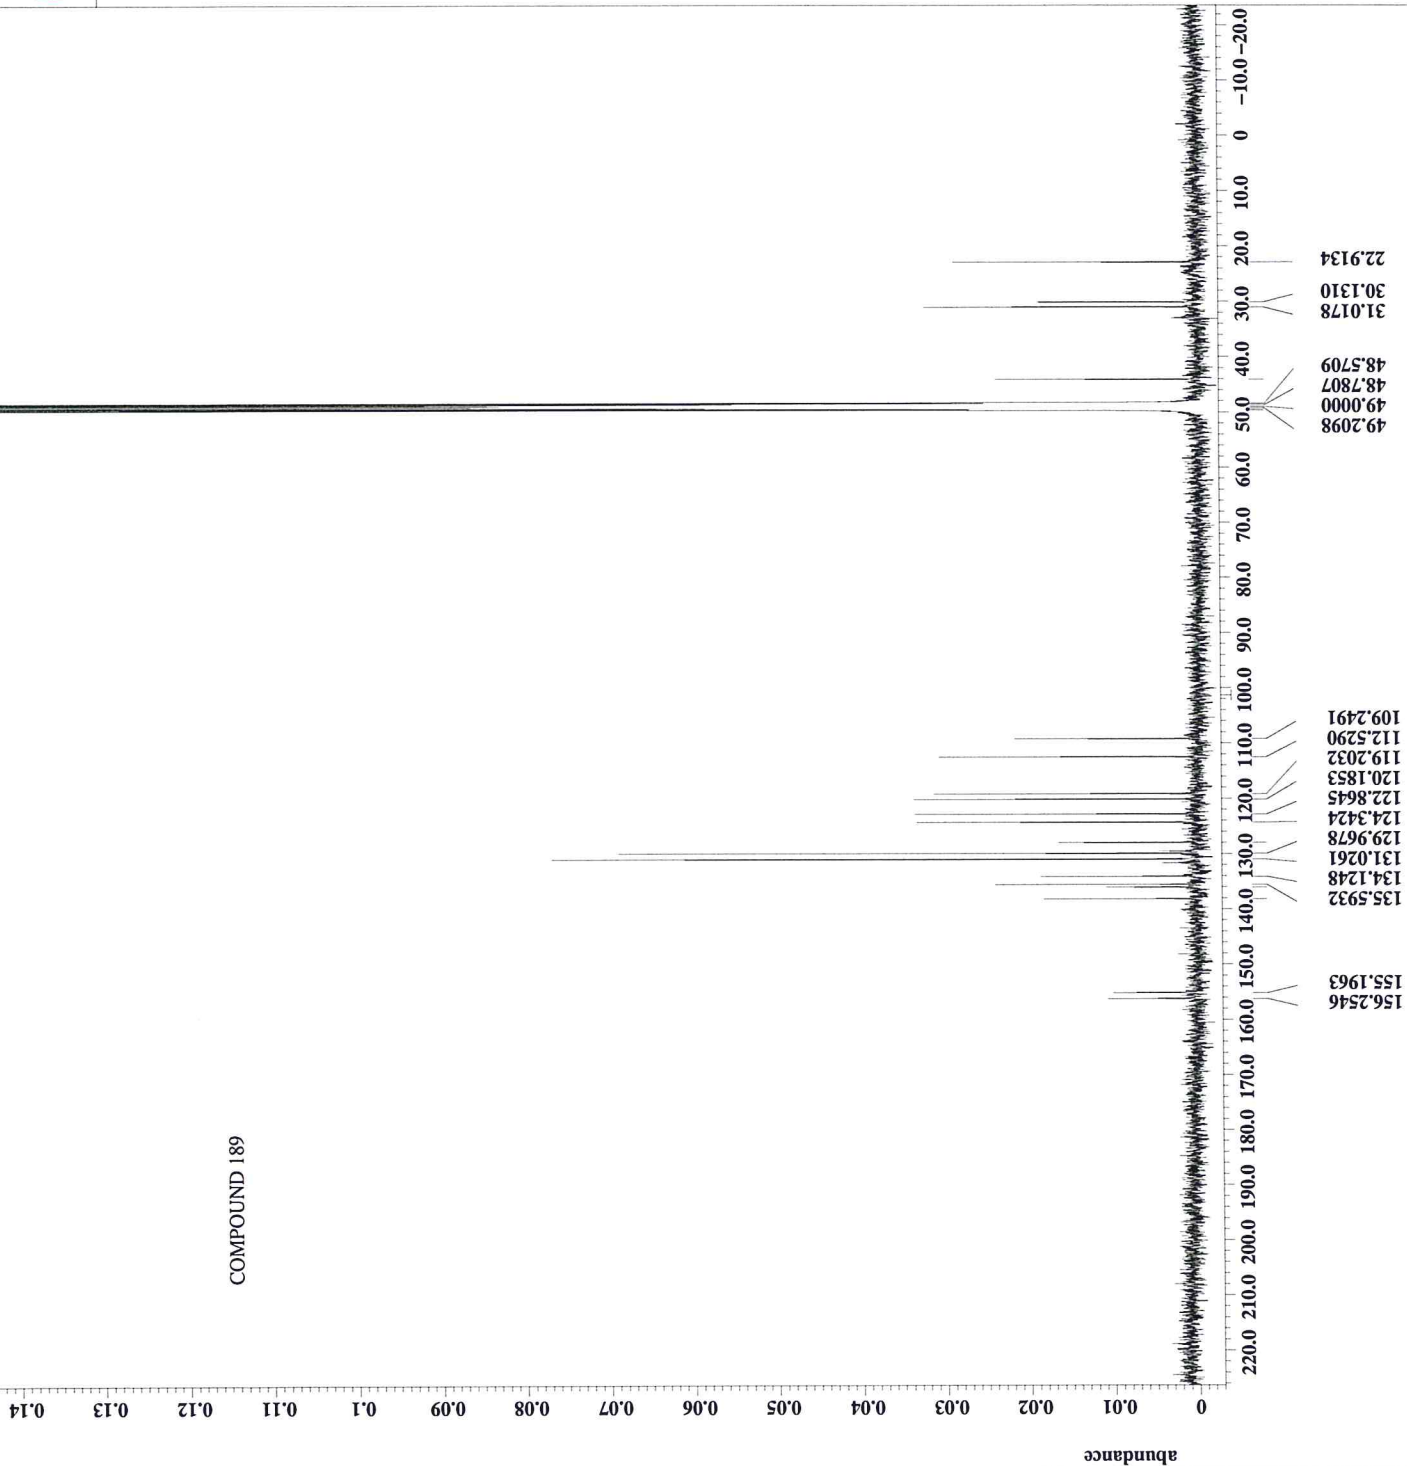

X : parts per Million : 13C

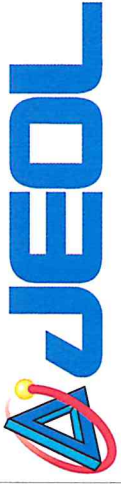

Filename = RF-I-7-C\_METHANOL\_PRO  
Author = Delta  
Experiment = single\_pulse.ex2  
Sample\_id = RF-I-7-C  
Solvent = METHANOL-D3  
Creation\_time = 13-FEB-2019 09:32:51  
Revision\_time = 17-MAR-2021 14:14:50  
Current\_time = 17-MAR-2021 14:15:06  
Data\_format = 1D COMPLEX  
Dim\_size = 13107  
Dim\_title = 1H  
Dim\_units = [ppm]  
Dimensions = X  
Site = ECS 400  
Spectrometer = JNM-ECS400  
Field\_strength = 9.389766[T] (400 [MHz])  
X\_acq\_duration = 2.18365952[s]  
X\_domain = 1H  
X\_freq = 399.78219838 [MHz]  
X\_offset = 5 [ppm]  
X\_points = 16384  
X\_prescans = 1  
X\_resolution = 0.45794685 [Hz]  
X\_sweep = 7.5030012 [kHz]  
Irr\_domain = 1H  
Irr\_freq = 399.78219838 [MHz]  
Irr\_offset = 5 [ppm]  
Tri\_domain = 1H  
Tri\_freq = 399.78219838 [MHz]  
Tri\_offset = 5 [ppm]  
Clipped = FALSE  
Mod\_return = 1  
Scans = 4  
Total\_scans = 4  
X\_90\_width = 11.365 [us]  
X\_acq\_time = 2.18365952 [s]  
X\_angle = 45 [deg]  
X\_atn = 6 [dB]  
X\_pulse = 5.6825 [us]  
Irr\_mode = Off  
Tri\_mode = Off  
Dante\_presat = FALSE  
Initial\_wait = 1 [s]  
Recvr\_gain = 48  
Relaxation\_delay = 4 [s]  
Repetition\_time = 6.18365952 [s]  
Temp\_get = 17.2 [dC]

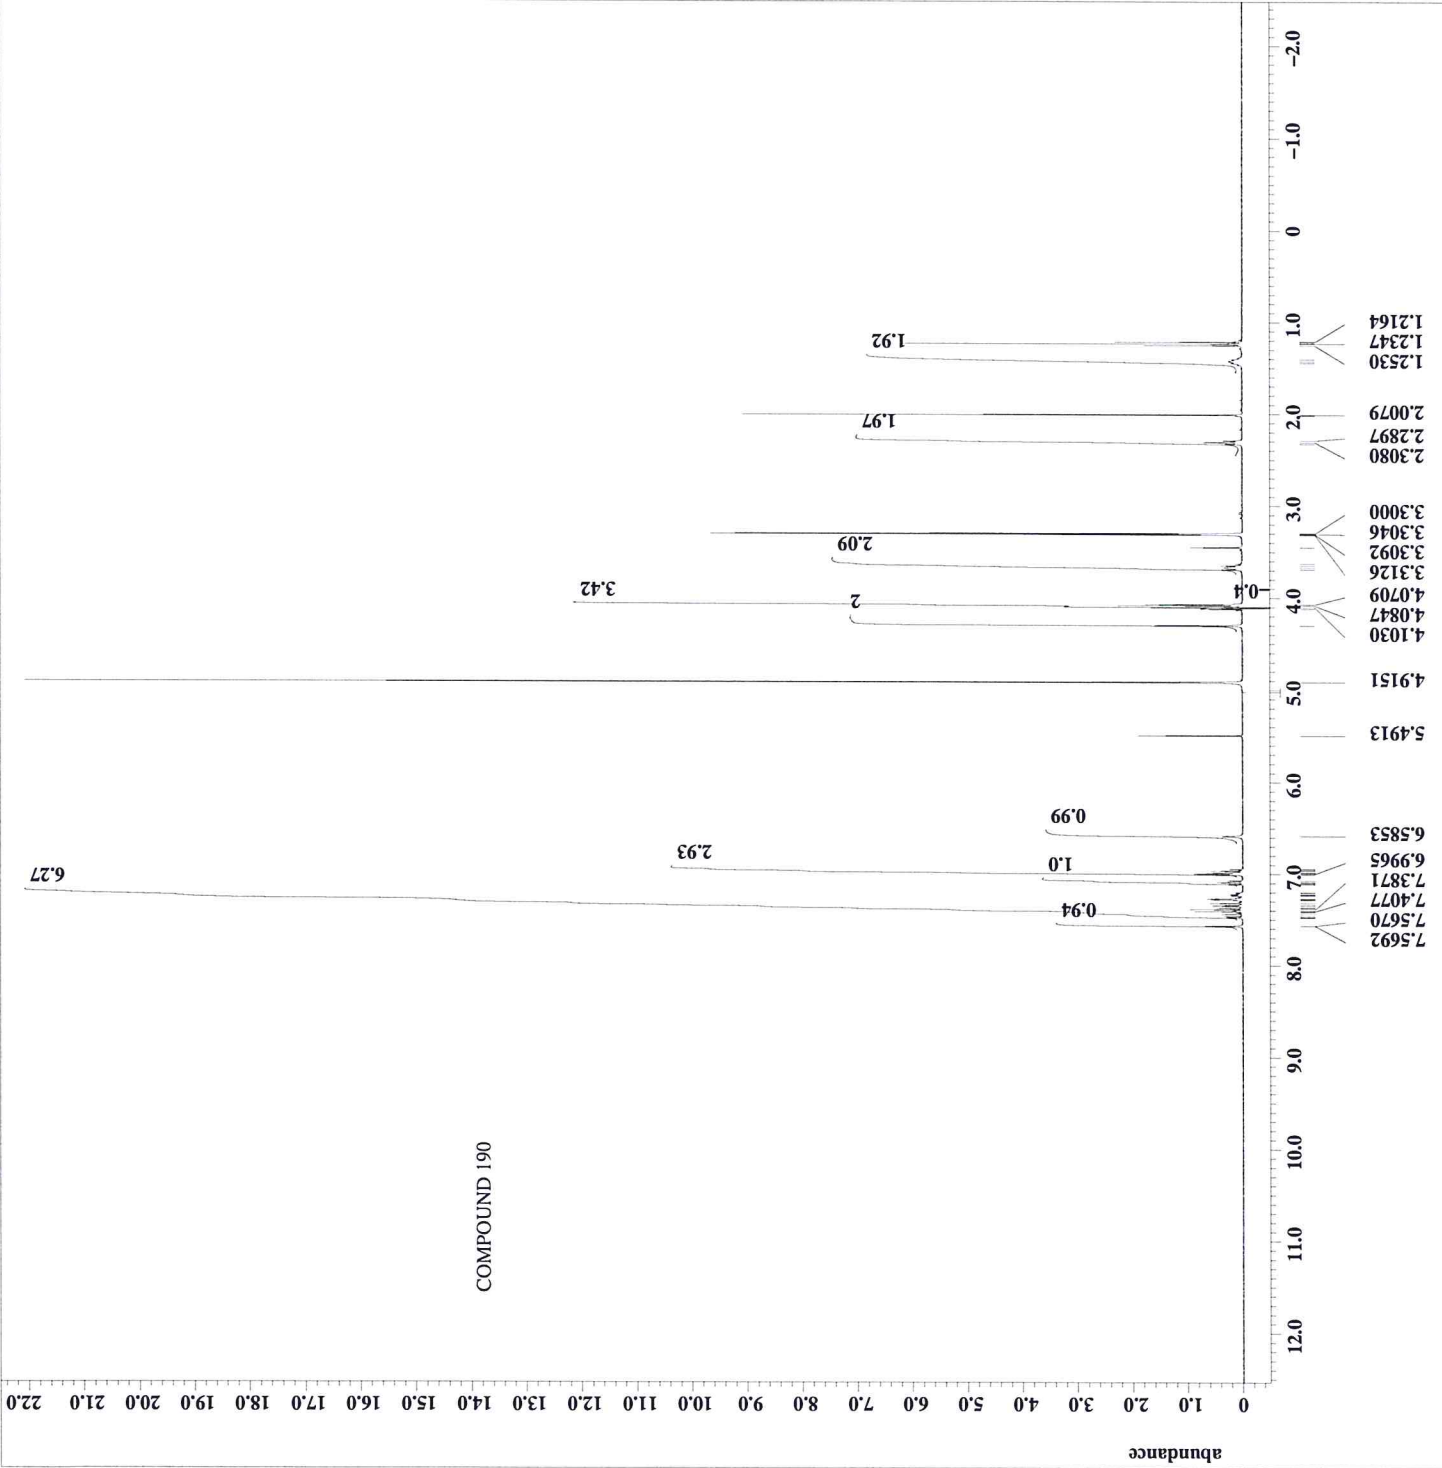

X : parts per Million : 1H

-7-C-METHANOL

COMPOUND 190

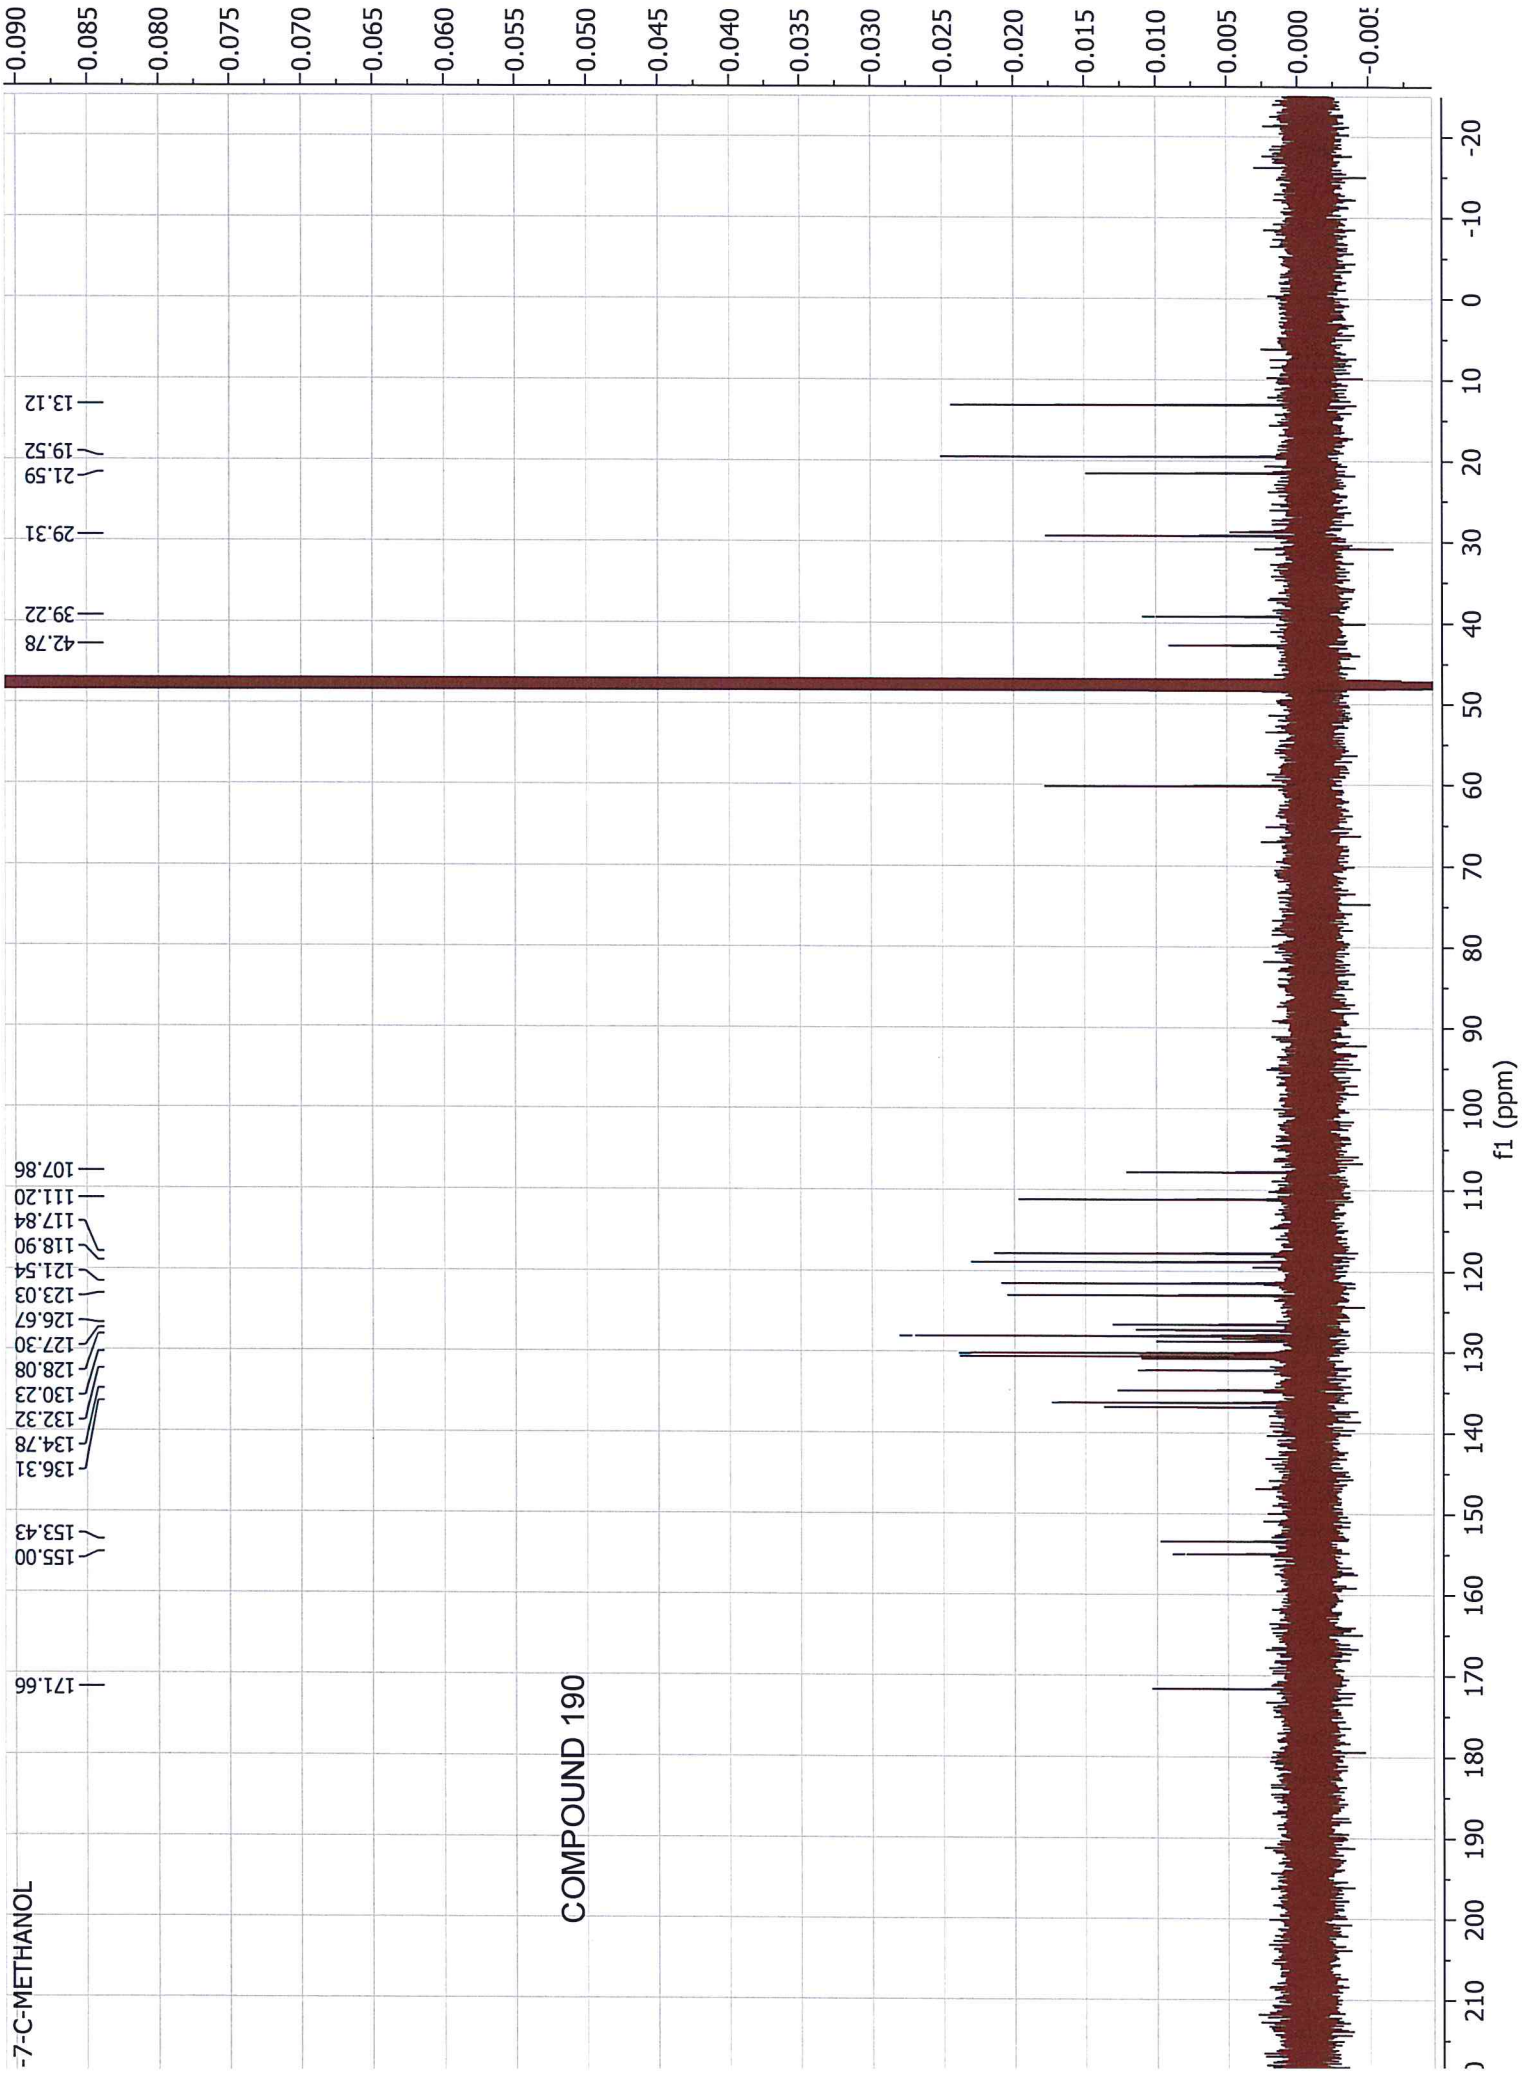

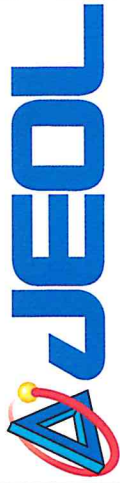

```

File      = RF-I-28_II_MeOH_PROTO
Author    = Delta
Experiment = single_pulse.ex2
Sample_id = RF-I-28_II_MeOH
Solvent   = METHANOL-D3
Creation_time = 5-JUL-2019 16:12:14
Revision_time = 12-MAR-2021 09:40:25
Current_time = 12-MAR-2021 09:40:29

Data_format = 1D COMPLEX
Dim_size    = 13107
Dim_title   = 1H
Dim_units   = [ppm]
Dimensions  = X
Site        = ECS 400
Spectrometer = JNM-ECS400

Field_strength = 9.389766[T] (400 [MHz])
X_acq_duration = 2.18365952[s]
X_domain       = 1H
X_freq         = 399.78219838 [MHz]
X_offset       = 5 [ppm]
X_points       = 16384
X_prescans     = 1
X_resolution   = 0.45794685 [Hz]
X_sweep        = 7.5030012 [kHz]
Irr_domain     = 1H
Irr_freq       = 399.78219838 [MHz]
Irr_offset     = 5 [ppm]
Tri_domain     = 1H
Tri_freq       = 399.78219838 [MHz]
Tri_offset     = 5 [ppm]
Clipped        = FALSE
Mod_return     = 1
Scans          = 8
Total_scans    = 8

X_90_width    = 11.365 [us]
X_acq_time    = 2.18365952 [s]
X_angle       = 45 [deg]
X_atn         = 6 [dB]
X_pulse       = 5.6825 [us]
Irr_mode      = Off
Tri_mode      = Off
Dante_presat  = FALSE
Initial_wait  = 1 [s]
Recvr_gain    = 46
Relaxation_delay = 4 [s]
Repetition_time = 6.18365952 [s]
Temp_get      = 20.3 [C]
  
```

COMPOUND 191

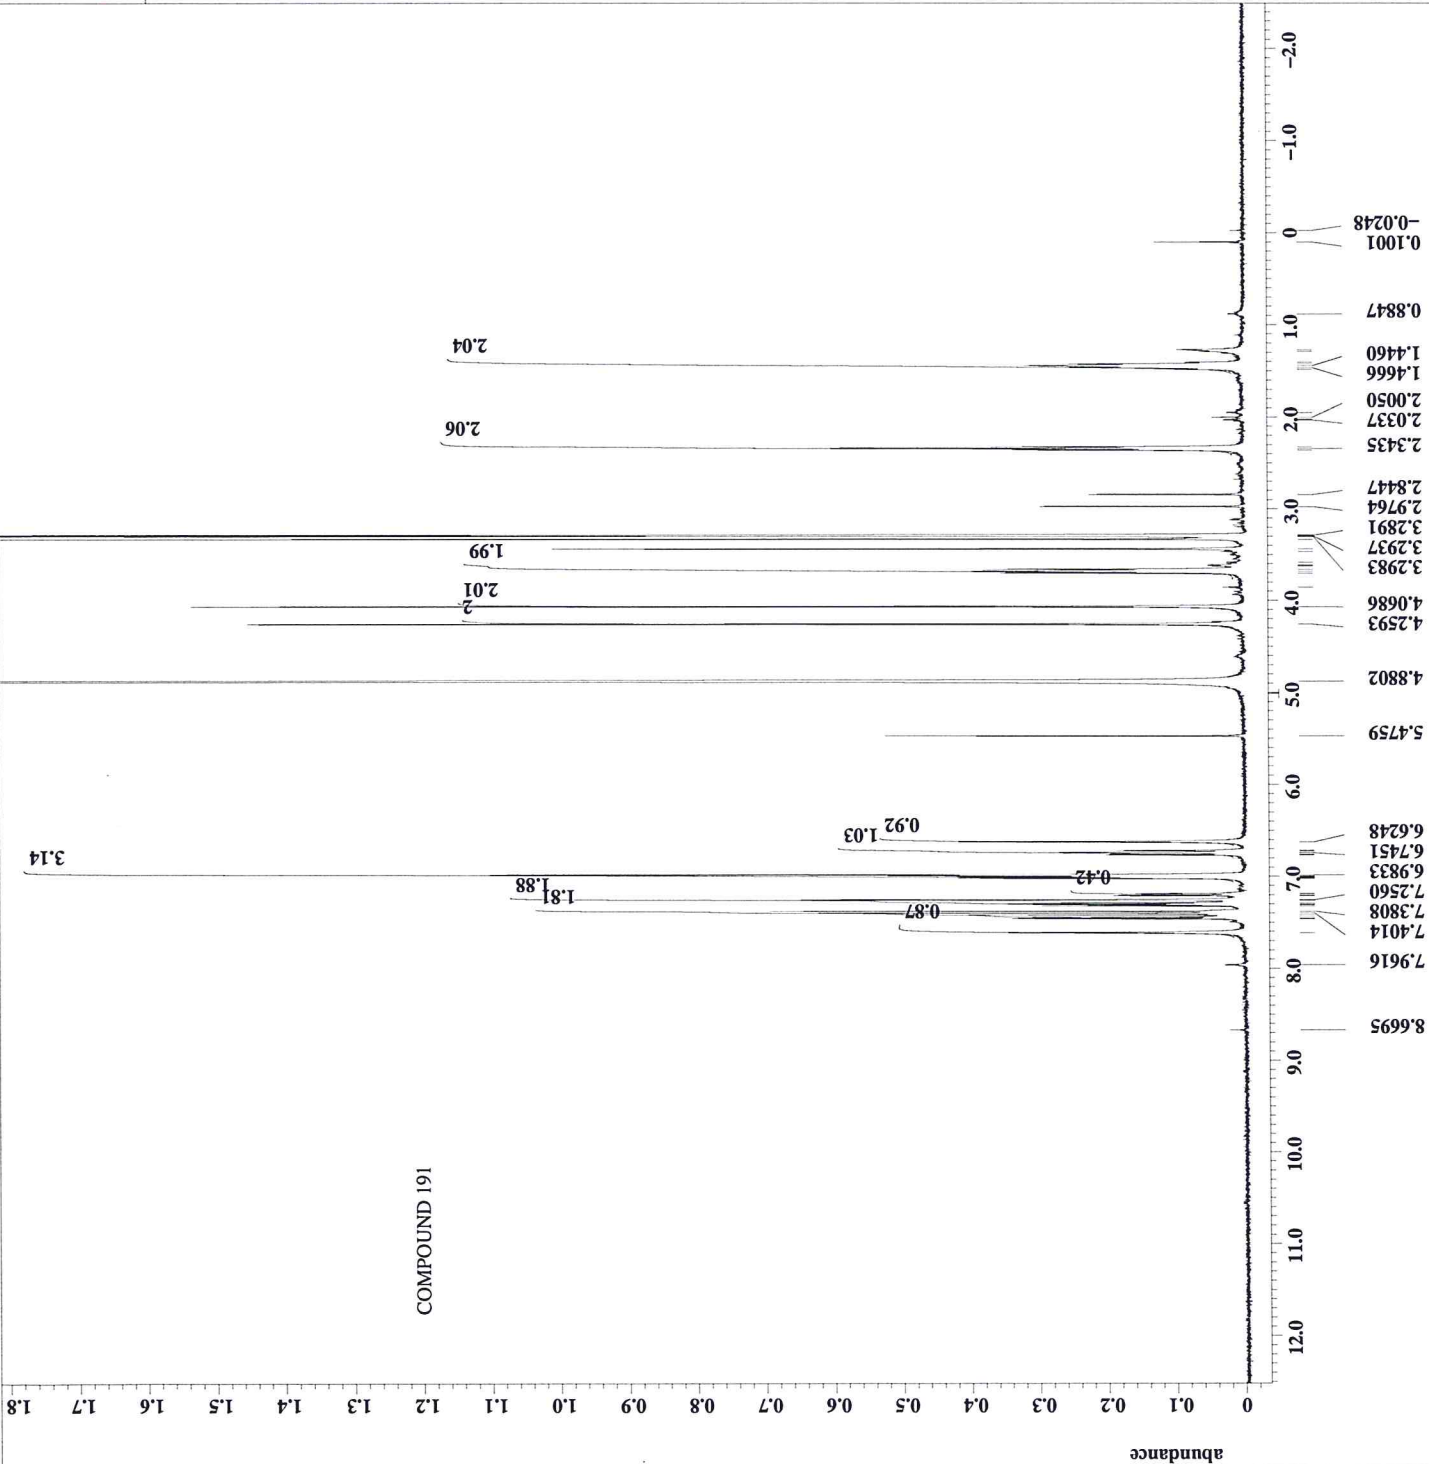

X : parts per Million : 1H



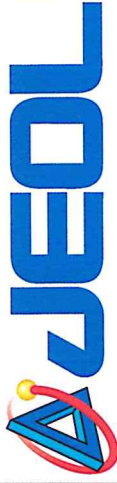

Filename = RF-I-28\_II\_MeOH\_CARBO  
Author = Delta  
Experiment = single\_pulse\_dec  
Sample\_id = RF-I-28\_II\_MeOH  
Solvent = METHANOL-D3  
Creation\_time = 7-JUL-2019 14:19:20  
Revision\_time = 12-MAR-2021 09:43:18  
Current\_time = 12-MAR-2021 09:43:22

Data\_format = 1D\_COMPLEX  
Dim\_size = 26214  
Dim\_title = 13C  
Dim\_units = [ppm]  
Dimensions = X  
Site = ECS 400  
Spectrometer = JNM-ECS400

Field\_strength = 9.389766[T] (400[MHz])  
X\_acq\_duration = 1.04333312[s]  
X\_domain = 13C  
X\_freq = 100.52530333[MHz]  
X\_offset = 100[ppm]  
X\_points = 32768  
X\_prescans = 4  
X\_resolution = 0.95846665[Hz]  
X\_sweep = 31.40703518[kHz]  
Irr\_domain = 1H  
Irr\_freq = 399.78219838[MHz]  
Irr\_offset = 5[ppm]  
Clipped = FALSE  
Mod\_return = 1  
Scans = 41024  
Total\_scans = 41024

X\_90\_width = 10.4[us]  
X\_acq\_time = 1.04333312[s]  
X\_angle = 30[deg]  
X\_atn = 9[db]  
X\_pulse = 3.46666667[us]  
Irr\_atn\_dec = 24.2[db]  
Irr\_atn\_noe = 24.2[db]  
Irr\_noise = WALTZ  
Decoupling = TRUE  
Initial\_wait = 1[s]  
Noe = TRUE  
Noe\_time = 3[s]  
Recvr\_gain = 58  
Relaxation\_delay = 3[s]  
Repetition\_time = 4.04333312[s]  
Temp\_get = 20.8[degC]

COMPOUND 191

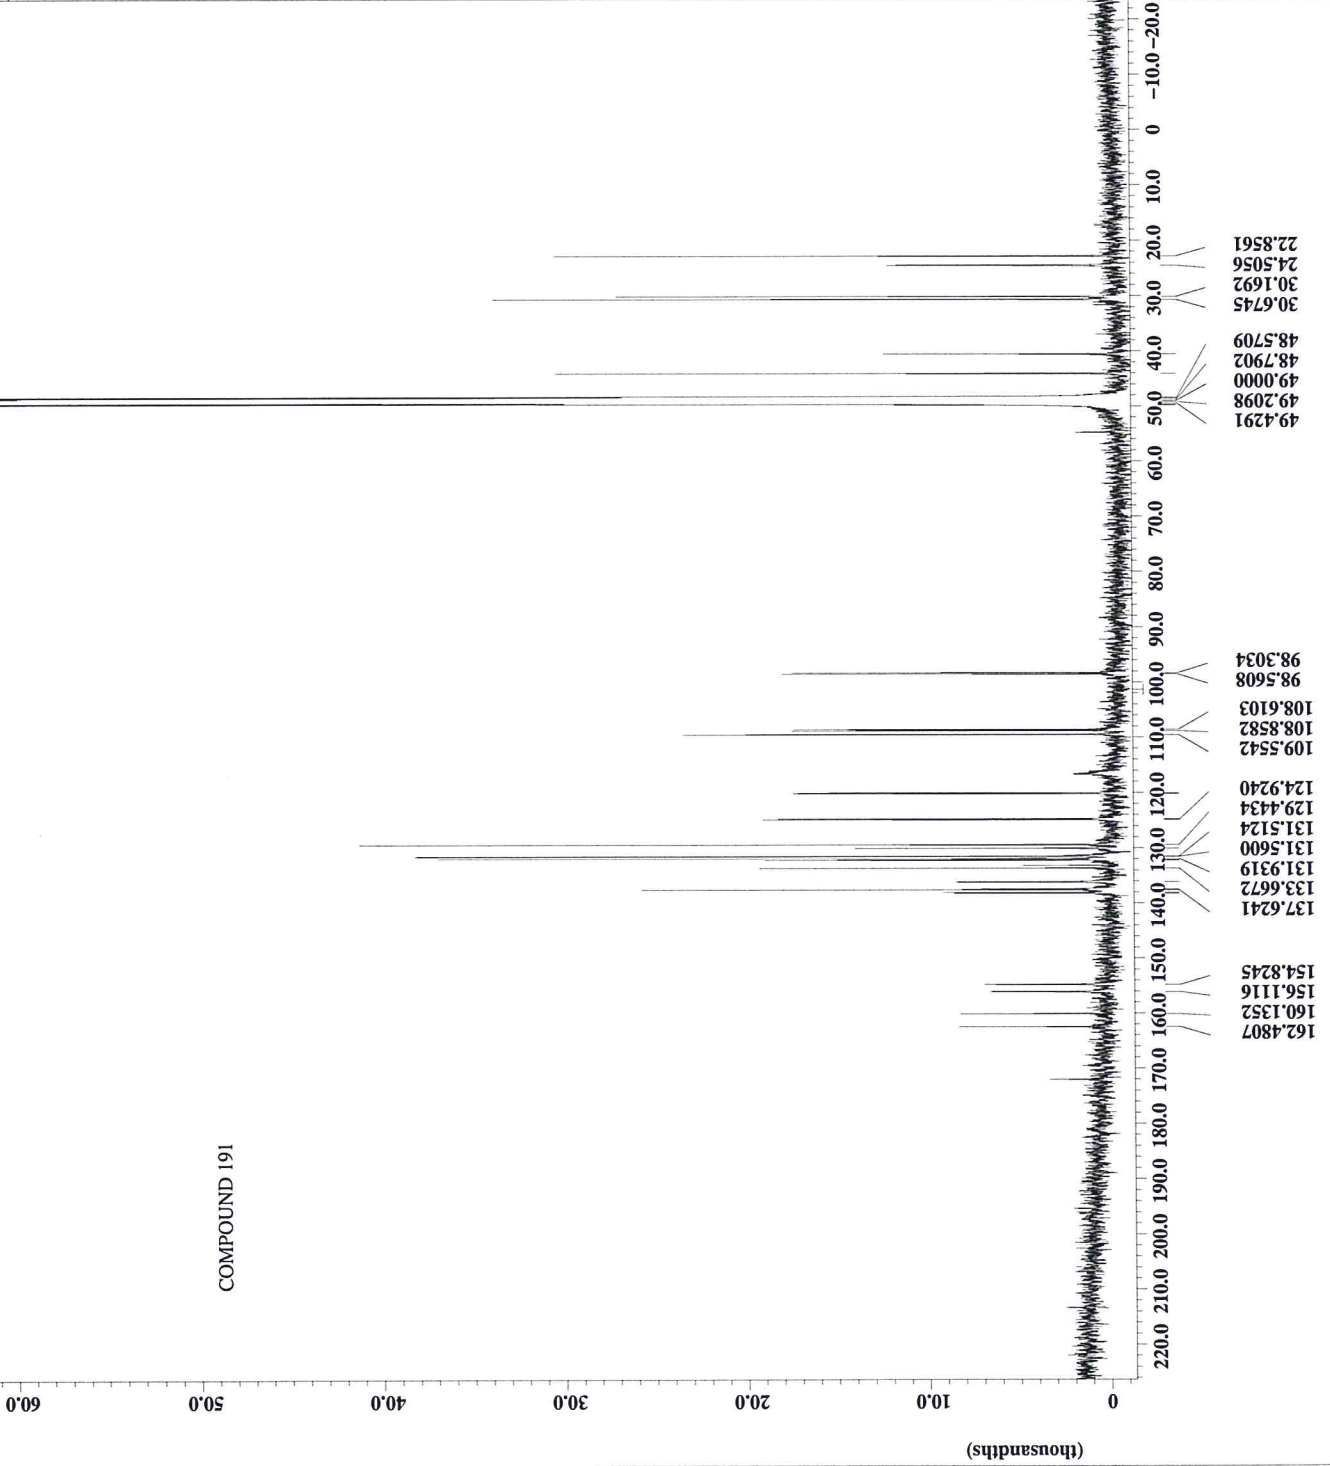

X : parts per Million : 13C

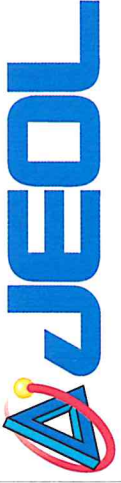

```

Filename = RF-I-39-MeOH_PROTON-4
Author = Delta
Experiment = single_pulse.ex2
Sample_id = RF-I-39-MeOH
Solvent = METHANOL-D3
Creation_time = 23-JUL-2019 20:21:35
Revision_time = 17-MAR-2021 13:24:06
Current_time = 17-MAR-2021 13:24:09

Data_format = 1D COMPLEX
Dim_size = 13107
Dim_title = 1H
Dim_units = [ppm]
Dimensions = X
Site = ECS 400
Spectrometer = JNM-ECS400

Field_strength = 9.389766[T] (400 [MHz])
X_acq_duration = 2.18365952[s]
X_domain = 1H
X_freq = 399.78219838 [MHz]
X_offset = 5 [ppm]
X_points = 16384
X_prescans = 1
X_resolution = 0.45794685 [Hz]
X_sweep = 7.5030012 [kHz]
Irr_domain = 1H
Irr_freq = 399.78219838 [MHz]
Irr_offset = 5 [ppm]
Tri_domain = 1H
Tri_freq = 399.78219838 [MHz]
Tri_offset = 5 [ppm]
Clipped = FALSE
Mod_return = 1
Total_scans = 8

X_90_width = 11.365 [us]
X_acq_time = 2.18365952 [s]
X_angle = 45 [deg]
X_atn = 6 [dB]
X_pulse = 5.6825 [us]
Irr_mode = Off
Tri_mode = Off
Dante_preset = FALSE
Initial_wait = 1 [s]
Recvr_gain = 46
Relaxation_delay = 4 [s]
Repetition_time = 6.18365952 [s]
Temp_get = 20.4 [dC]
  
```

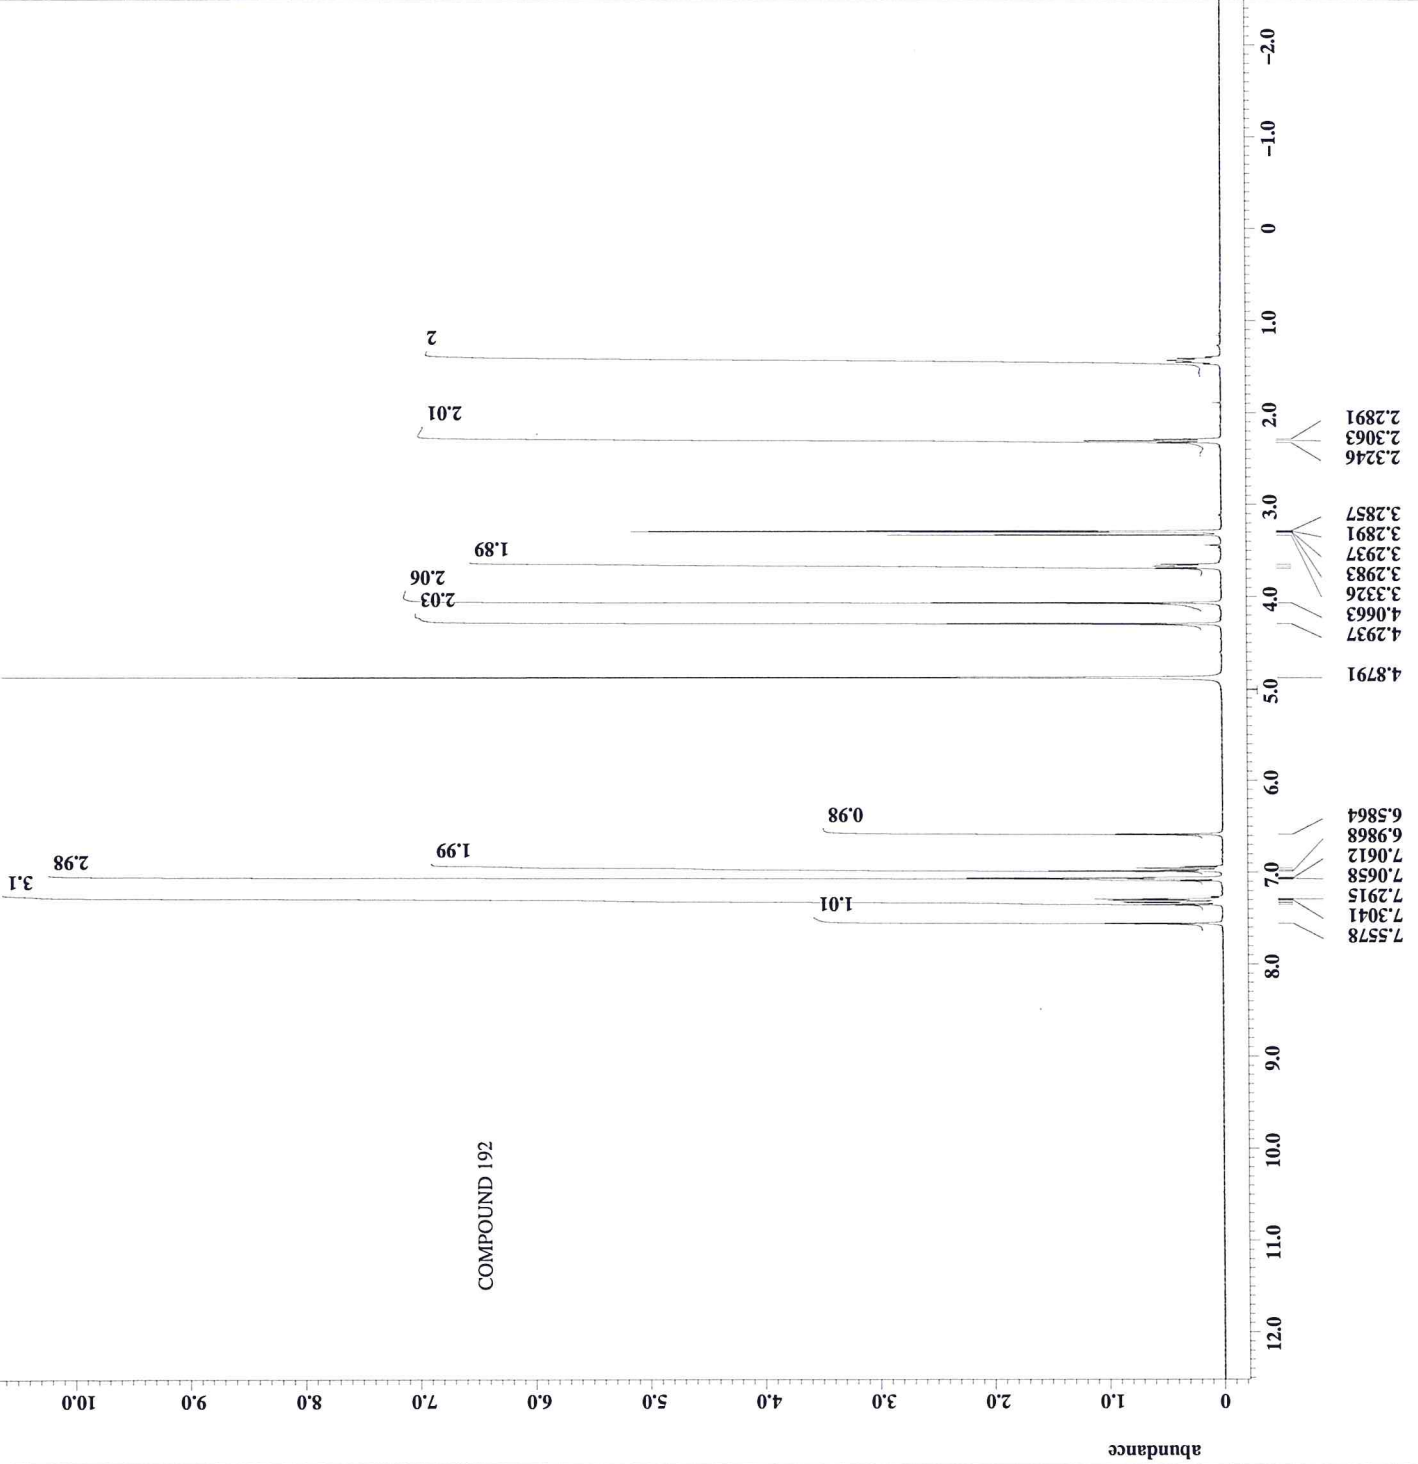

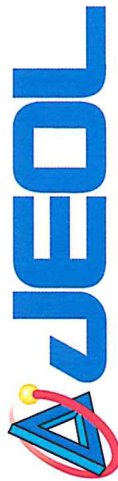

Filename = RF-I-39-MeOH-CARBON-5  
Author = Delta  
Experiment = single\_pulse\_dec  
Sample\_id = RF-I-39-MeOH  
Solvent = METHANOL-D3  
Creation\_time = 24-JUL-2019 08:35:20  
Revision\_time = 17-MAR-2021 13:26:52  
Current\_time = 17-MAR-2021 13:26:56

Data\_format = 1D COMPLEX  
Dim\_size = 26214  
Dim\_title = 13C  
Dim\_units = [ppm]  
Dimensions = X  
Site = ECS 400  
Spectrometer = JNM-ECS400

Field\_strength = 9.389766[T] (400 [MHz])  
X\_acq\_duration = 1.04333312[s]  
X\_domain = 13C  
X\_freq = 100.52530333 [MHz]  
X\_offset = 100 [ppm]  
X\_points = 32768  
X\_prescans = 4  
X\_resolution = 0.95846665 [Hz]  
X\_sweep = 31.40703518 [kHz]  
Irr\_domain = 1H  
Irr\_freq = 399.78219838 [MHz]  
Irr\_offset = 5 [ppm]  
Clipped = FALSE  
Mod\_return = 1  
Scans = 10850  
Total\_scans = 10850

X\_90\_width = 10.4 [us]  
X\_acq\_time = 1.04333312 [s]  
X\_angle = 30 [deg]  
X\_atn = 9 [dB]  
X\_pulse = 3.46666667 [us]  
Irr\_atn\_dec = 24.2 [dB]  
Irr\_atn\_noe = 24.2 [dB]  
Irr\_noise = WALTZ  
Decoupling = TRUE  
Initial\_wait = 1 [s]  
Noe = TRUE  
Noe\_time = 3 [s]  
Recvr\_gain = 58  
Relaxation\_delay = 3 [s]  
Repetition\_time = 4.04333312 [s]  
Temp\_get = 19.6 [dC]

COMPOUND 192

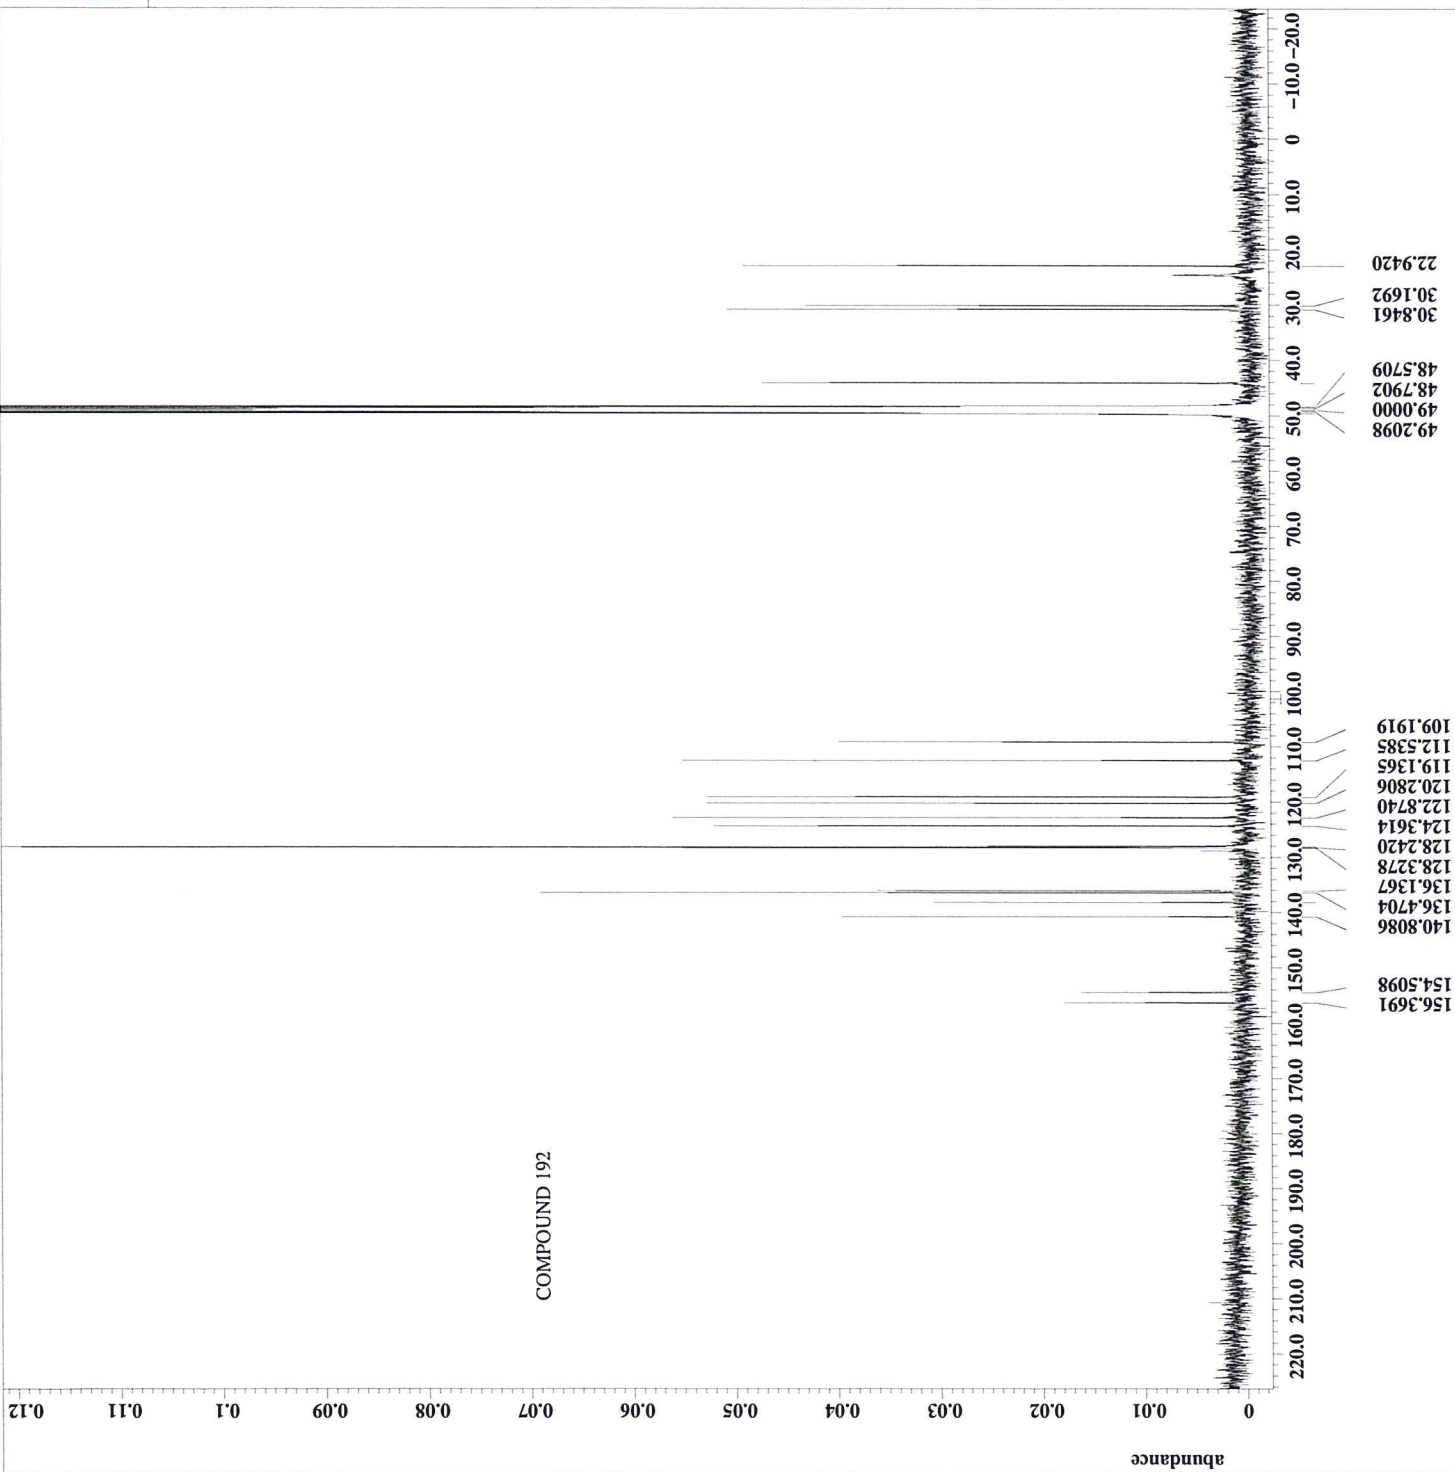

X : parts per Million : 13C

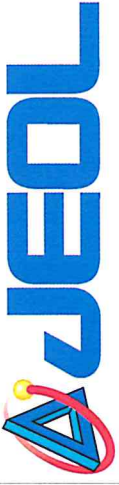

Filename = RF-I-38\_MEOH\_PROTON-5  
Author = Delta  
Experiment = single\_pulse.ex2  
Sample\_id = RF-I-38\_MEOH  
Solvent = METHANOL-D3  
Creation\_time = 22-JUL-2019 16:53:08  
Revision\_time = 17-MAR-2021 13:14:06  
Current\_time = 17-MAR-2021 13:14:10  
Data\_format = 1D COMPLEX  
Dim\_size = 13107  
Dim\_title = 1H  
Dim\_units = [ppm]  
Dimensions = X  
Site = ECS 400  
Spectrometer = JNM-ECS400  
Field\_strength = 9.389766 [T] (400 [MHz])  
X\_acq\_duration = 2.18365952 [s]  
X\_domain = 1H  
X\_freq = 399.78219838 [MHz]  
X\_offset = 5 [ppm]  
X\_points = 16384  
X\_prescans = 1  
X\_resolution = 0.45794685 [Hz]  
X\_sweep = 7.5030012 [kHz]  
Irr\_domain = 1H  
Irr\_freq = 399.78219838 [MHz]  
Irr\_offset = 5 [ppm]  
Tri\_domain = 1H  
Tri\_freq = 399.78219838 [MHz]  
Tri\_offset = 5 [ppm]  
Clipped = FALSE  
Mod\_return = 1  
Scans = 8  
Total\_scans = 8  
X\_90\_width = 11.365 [us]  
X\_acq\_time = 2.18365952 [s]  
X\_angle = 45 [deg]  
X\_atn = 6 [dB]  
X\_pulse = 5.6825 [us]  
Irr\_mode = Off  
Tri\_mode = Off  
Dante\_preset = FALSE  
Initial\_wait = 1 [s]  
Recvr\_gain = 46  
Relaxation\_delay = 4 [s]  
Repetition\_time = 6.18365952 [s]  
Temp\_get = 20 [dc]

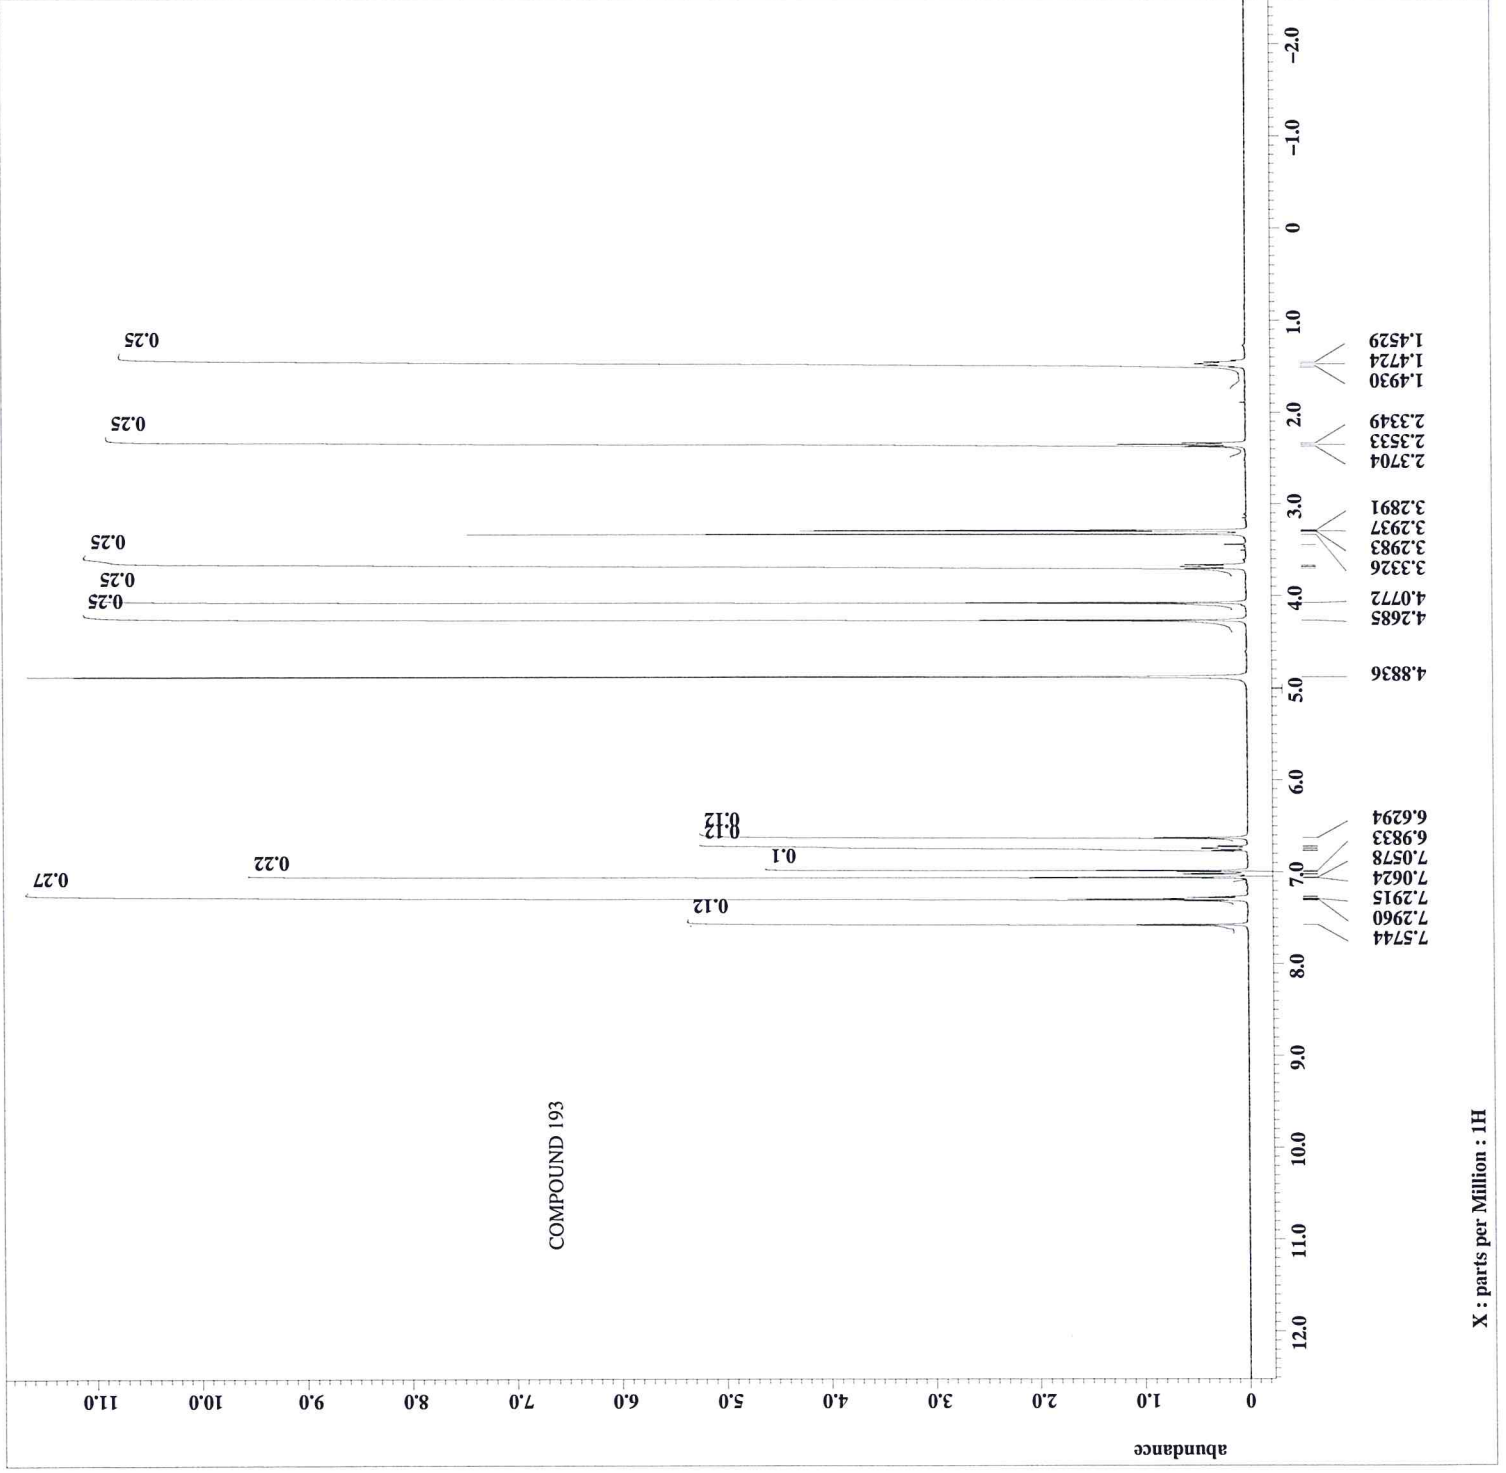

X : parts per Million : 1H



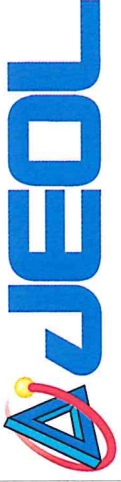

Filename = RF-I-38\_MEOH\_CARBON-5  
Author = Delta  
Experiment = single\_pulse\_dec  
Sample\_id = RF-I-38\_MEOH  
Solvent = METHANOL-D3  
Creation\_time = 23-JUL-2019 07:03:23  
Revision\_time = 17-MAR-2021 13:10:38  
Current\_time = 17-MAR-2021 13:10:42  
Data\_format = 1D COMPLEX  
Dim\_size = 26214  
Dim\_title = 13C  
Dim\_units = [ppm]  
Dimensions = X  
Site = ECS 400  
Spectrometer = JNM-ECS400  
Field\_strength = 9.389766[T] (400 [MHz])  
X\_acq\_duration = 1.04333312[s]  
X\_domain = 13C  
X\_freq = 100.52530333 [MHz]  
X\_points = 32768  
X\_prescans = 4  
X\_resolution = 0.95846665 [Hz]  
X\_sweep = 31.40703518 [kHz]  
Irr\_domain = 1H  
Irr\_freq = 399.78219838 [MHz]  
Irr\_offset = 5 [ppm]  
Clipped = FALSE  
Mod\_return = 1  
Scans = 12579  
Total\_scans = 12579  
X\_90\_width = 10.4 [us]  
X\_acq\_time = 1.04333312 [s]  
X\_angle = 30 [deg]  
X\_atn = 9 [dB]  
X\_pulse = 3.46666667 [us]  
Irr\_atn\_dec = 24.2 [dB]  
Irr\_atn\_noe = 24.2 [dB]  
Irr\_noise = WALTZ  
Decoupling = TRUE  
Initial\_wait = 1 [s]  
Noe\_time = TRUE  
Noe\_time = 3 [s]  
Recvr\_gain = 58  
Relaxation\_delay = 3 [s]  
Repetition\_time = 4.04333312 [s]  
Temp\_get = 19.8 [dC]

COMPOUND 193

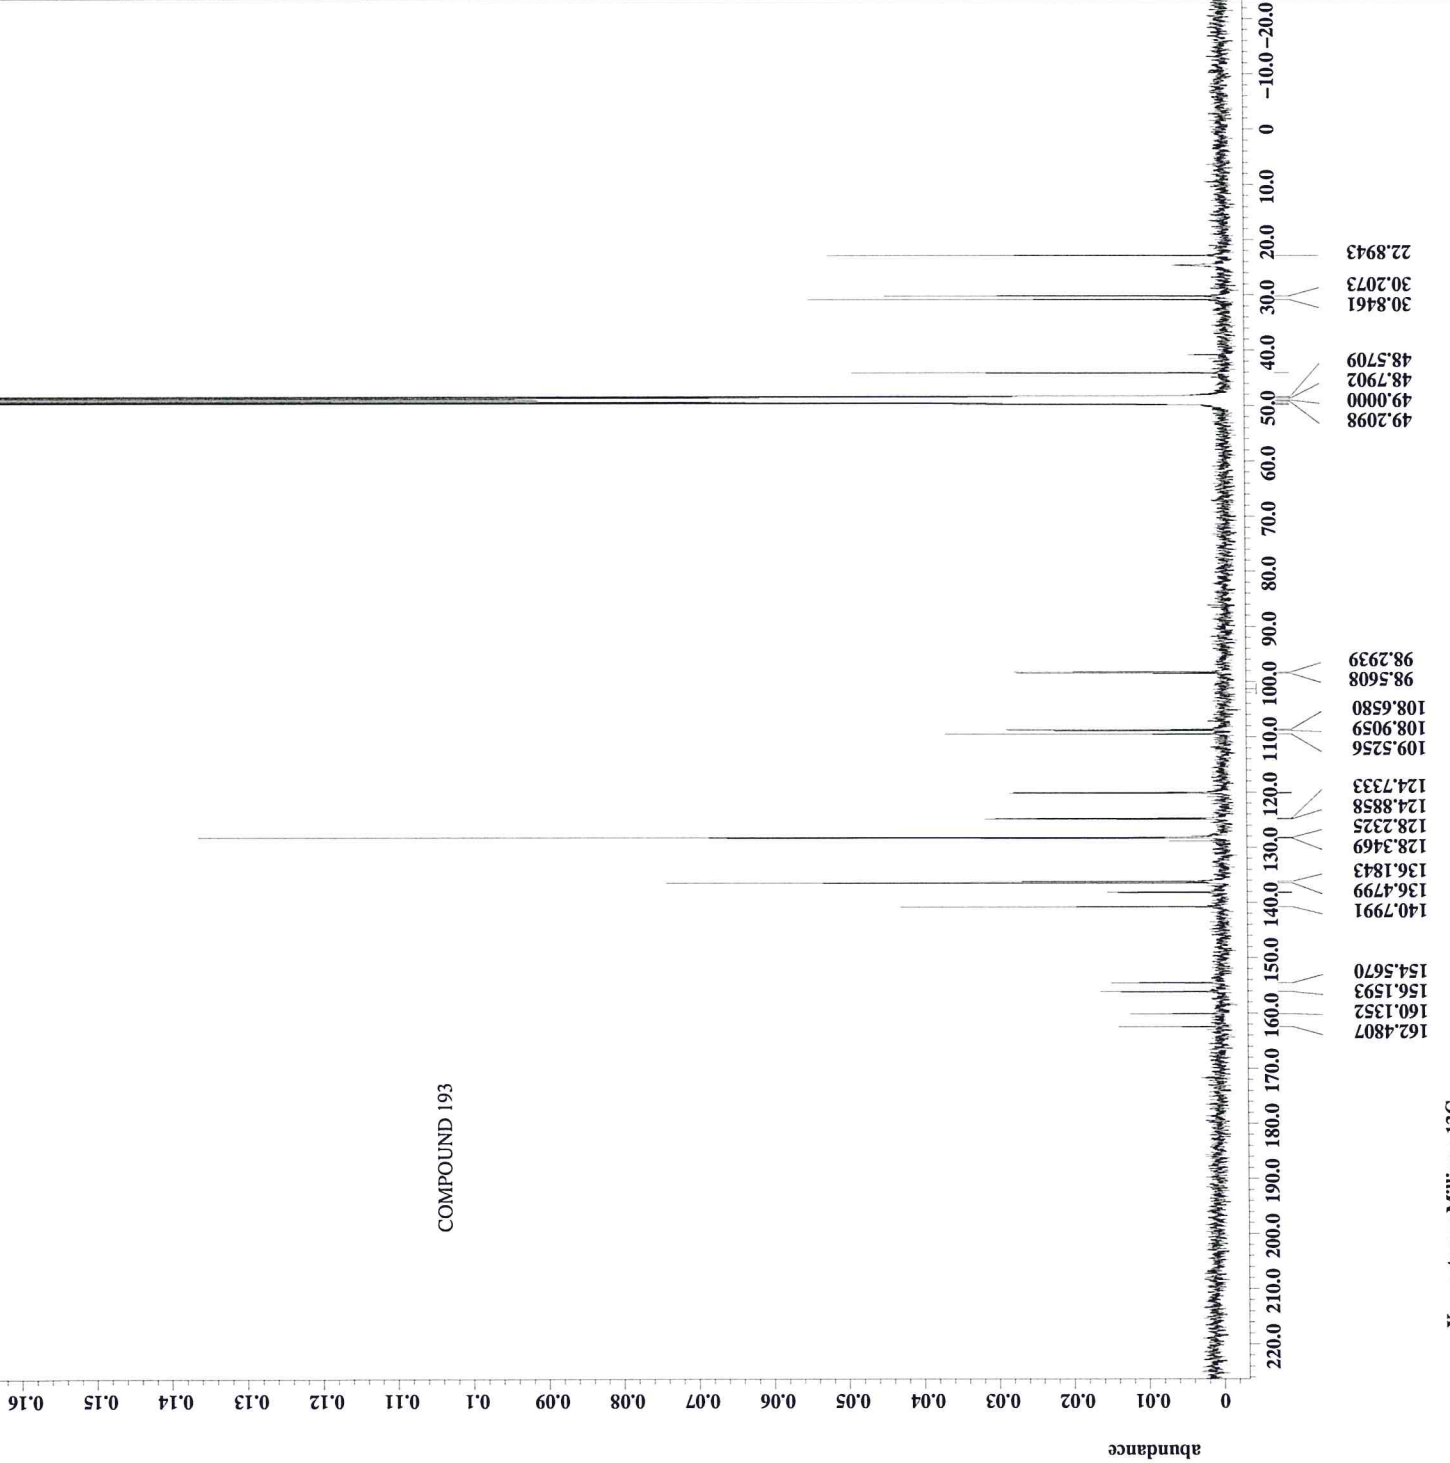

X : parts per Million : 13C

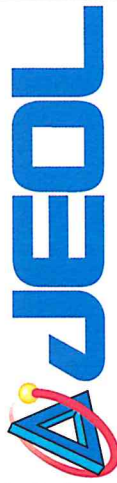

Filename = MM-I-83\_PROTON-5.jdf  
Author = Delta  
Experiment = single\_pulse.ex2  
Sample\_id = MM-I-83  
Solvent = METHANOL-D3  
Creation\_time = 24-JAN-2017 17:13:17  
Revision\_time = 15-MAR-2021 14:58:40  
Current\_time = 15-MAR-2021 14:58:44

Data\_format = 1D COMPLEX  
Dim\_size = 13107  
Dim\_title = 1H  
Dim\_units = [ppm]  
Dimensions = X  
Site = ECS 400  
Spectrometer = JNM-ECS400

Field\_strength = 9.389766[T] (400[MHz])  
X\_acq\_duration = 2.18365952[s]  
X\_domain = 1H  
X\_freq = 399.78219838[MHz]  
X\_offset = 5[ppm]  
X\_points = 16384  
X\_prescans = 1  
X\_resolution = 0.45794685[Hz]  
X\_sweep = 7.5030012[kHz]  
Irr\_domain = 1H  
Irr\_freq = 399.78219838[MHz]  
Irr\_offset = 5[ppm]  
Tri\_domain = 1H  
Tri\_freq = 399.78219838[MHz]  
Tri\_offset = 5[ppm]  
Clipped = FALSE  
Mod\_return = 1  
Total\_scans = 16

X\_90\_width = 10.68[us]  
X\_acq\_time = 2.18365952[s]  
X\_angle = 45[deg]  
X\_atn = 6[db]  
X\_pulse = 5.34[us]  
Irr\_mode = Off  
Tri\_mode = Off  
Dante\_presat = FALSE  
Initial\_wait = 1[s]  
Recvr\_gain = 46  
Relaxation\_delay = 4[s]  
Repetition\_time = 6.18365952[s]  
Temp\_get = 18.3[degC]

COMPOUND 194

78.22

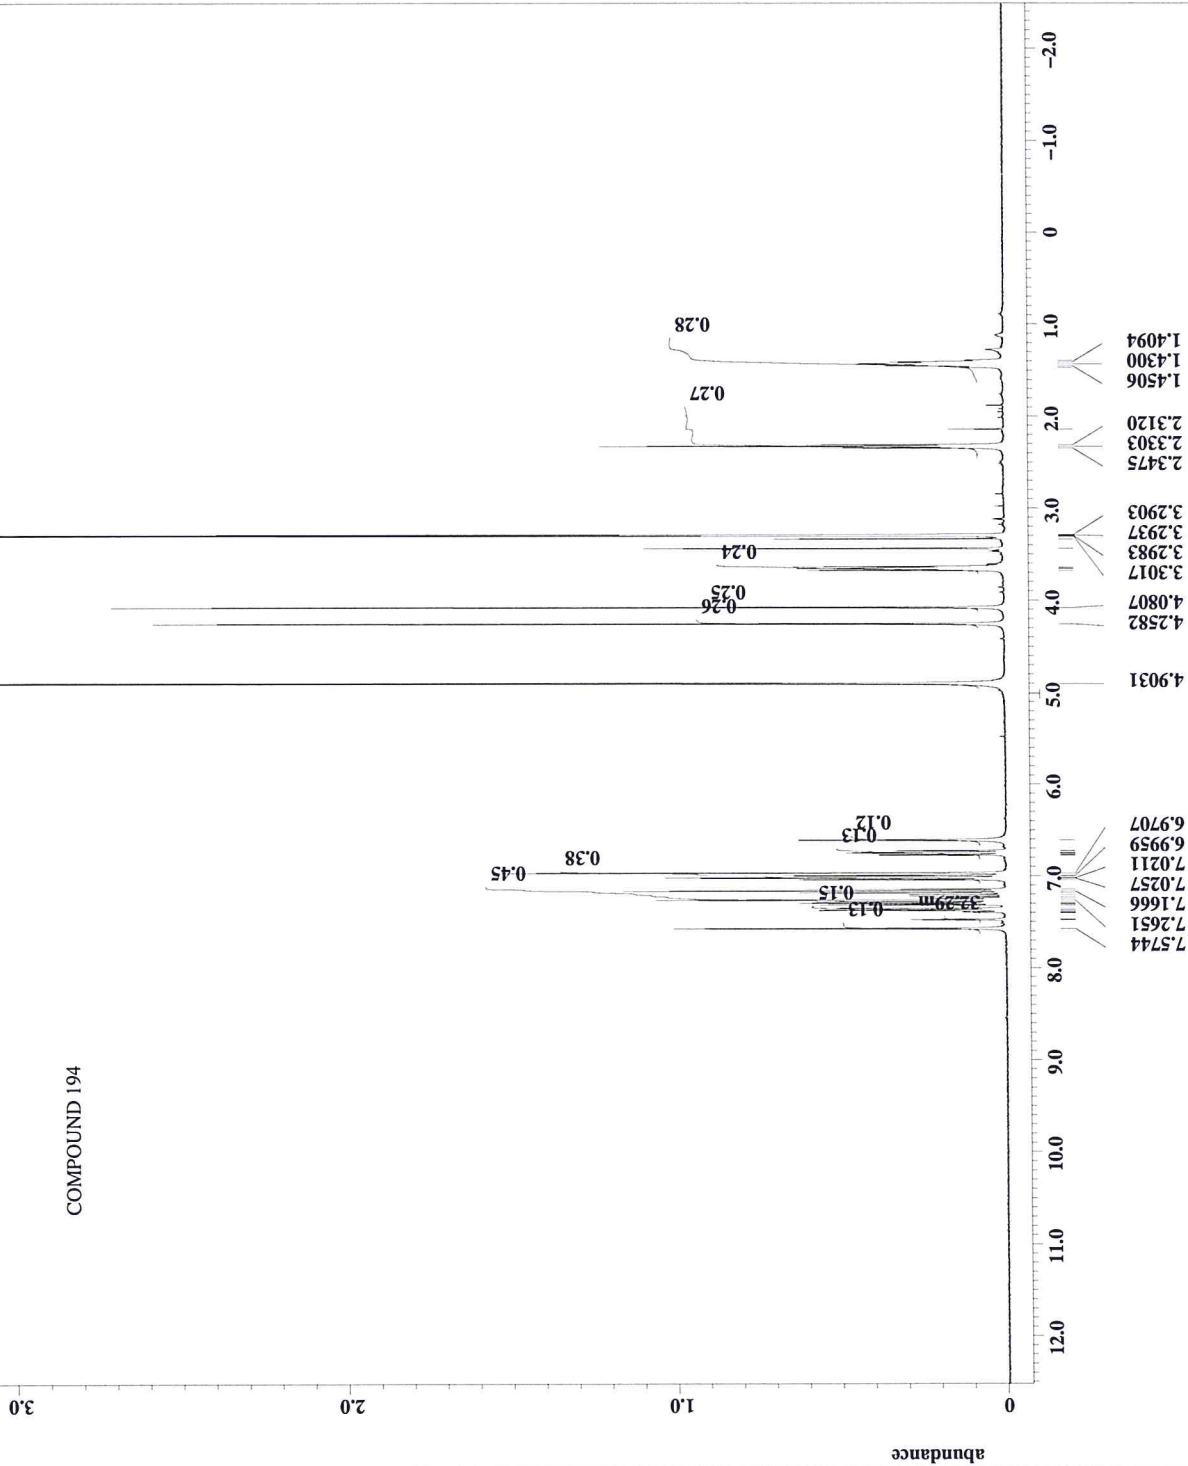

X : parts per Million : 1H

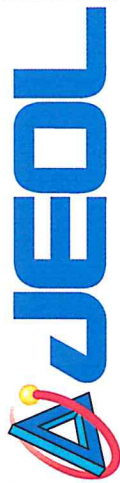

File name = MM-I-83\_CARBON-5.jdf  
Author = Delta  
Experiment = single\_pulse\_dec  
Sample\_id = MM-I-83  
Solvent = METHANOL-D3  
Creation time = 25-JAN-2017 06:46:12  
Revision time = 15-MAR-2021 15:00:44  
Current\_time = 15-MAR-2021 15:00:48  
Data\_format = 1D COMPLEX  
Dim\_size = 26214  
Dim\_title = 13C  
Dim\_units = [ppm]  
Dimensions = X  
Site = ECS 400  
Spectrometer = JNM-ECS400  
Field\_strength = 9.389766[T] (400 [MHz])  
X\_acq\_duration = 1.04333312[s]  
X\_domain = 13C  
X\_freq = 100.52530333 [MHz]  
X\_offset = 100 [ppm]  
X\_points = 32768  
X\_prescans = 4  
X\_resolution = 0.95846665 [Hz]  
X\_sweep = 31.40703518 [kHz]  
Irr\_domain = 1H  
Irr\_freq = 399.78219838 [MHz]  
Irr\_offset = TRUE  
Clipped = TRUE  
Mod\_return = 1  
Total\_scans = 16000  
X\_90\_width = 12.84 [us]  
X\_acq\_time = 1.04333312 [s]  
X\_angle = 30 [deg]  
X\_atn = 9 [dB]  
X\_pulse = 4.28 [us]  
Irr\_atn\_dec = 27 [dB]  
Irr\_atn\_noe = 27 [dB]  
Irr\_noise = WALTZ  
Decoupling = TRUE  
Initial\_wait = 1 [s]  
Noe = TRUE  
Noe\_time = 2 [s]  
Recvr\_gain = 58  
Relaxation\_delay = 2 [s]  
Repetition\_time = 3.04333312 [s]  
Temp\_get = 15.5 [dC]

COMPOUND 194

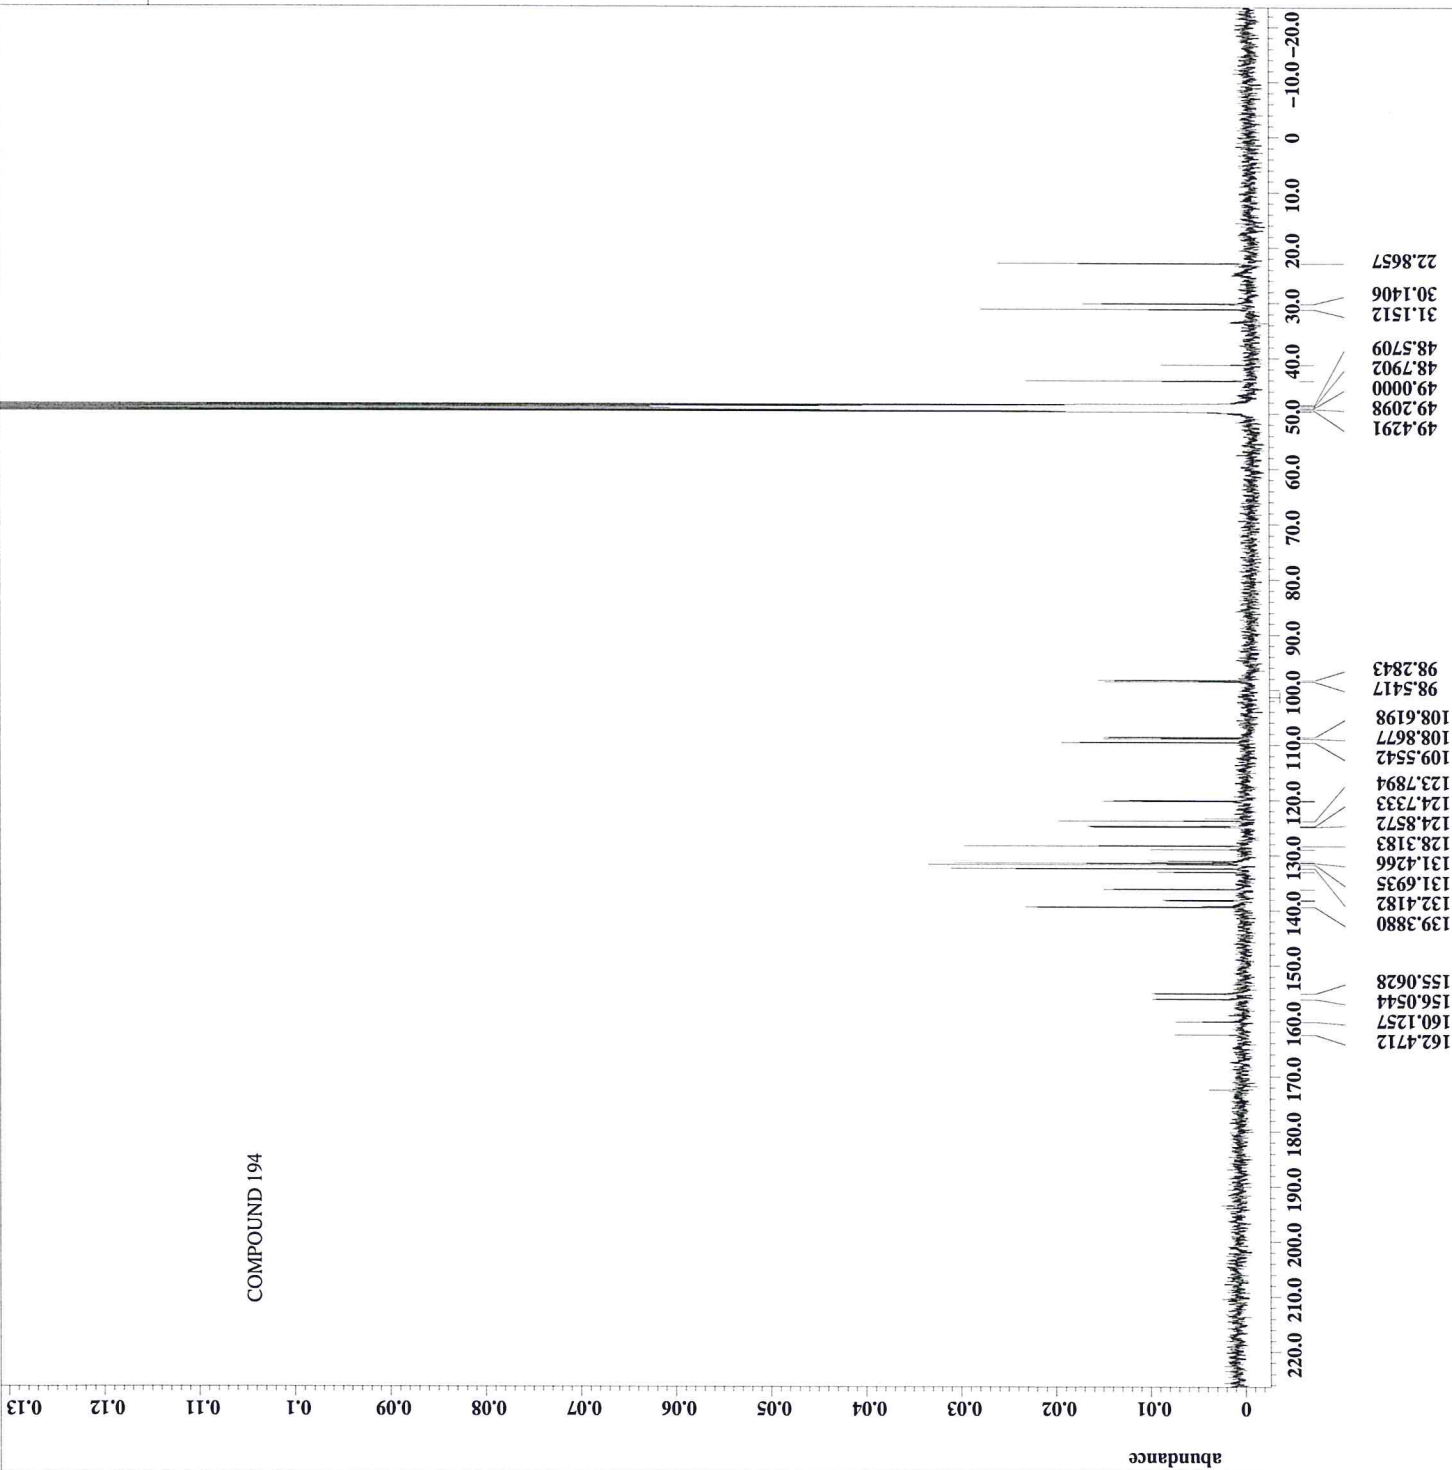

X : parts per Million : 13C

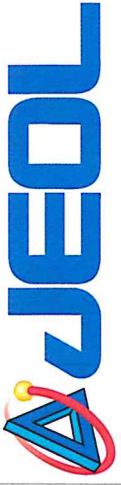

= MM-I-66\_PROTON-4.jdf  
 = Delta  
 = single\_pulse.ex2  
 = MM-I-66  
 = METHANOL-D3  
 = 9-NOV-2016 17:19:35  
 = 11-MAR-2021 10:54:15  
 = 11-MAR-2021 10:54:19  
 = 1D COMPLEX  
 = 13107  
 = 1H  
 = [ppm]  
 = X  
 = ECS 400  
 = JNM-ECS400  
 = 9.389766[T] (400[MHz])  
 = 2.18365952[s]  
 = 1H  
 = 399.78219838[MHz]  
 = 5[ppm]  
 = 16384  
 = 1  
 = 0.45794685[Hz]  
 = 7.5030012[kHz]  
 = 1H  
 = 399.78219838[MHz]  
 = 5[ppm]  
 = 1H  
 = 399.78219838[MHz]  
 = 5[ppm]  
 = FALSE  
 = 1  
 = 16  
 = 16  
 = 10.68[us]  
 = 2.18365952[s]  
 = 45[deg]  
 = 6[db]  
 = 5.34[us]  
 = Off  
 = Off  
 = FALSE  
 = 1[s]  
 = 44  
 = 4[us]  
 = 6.18365952[s]  
 = 22[dc]

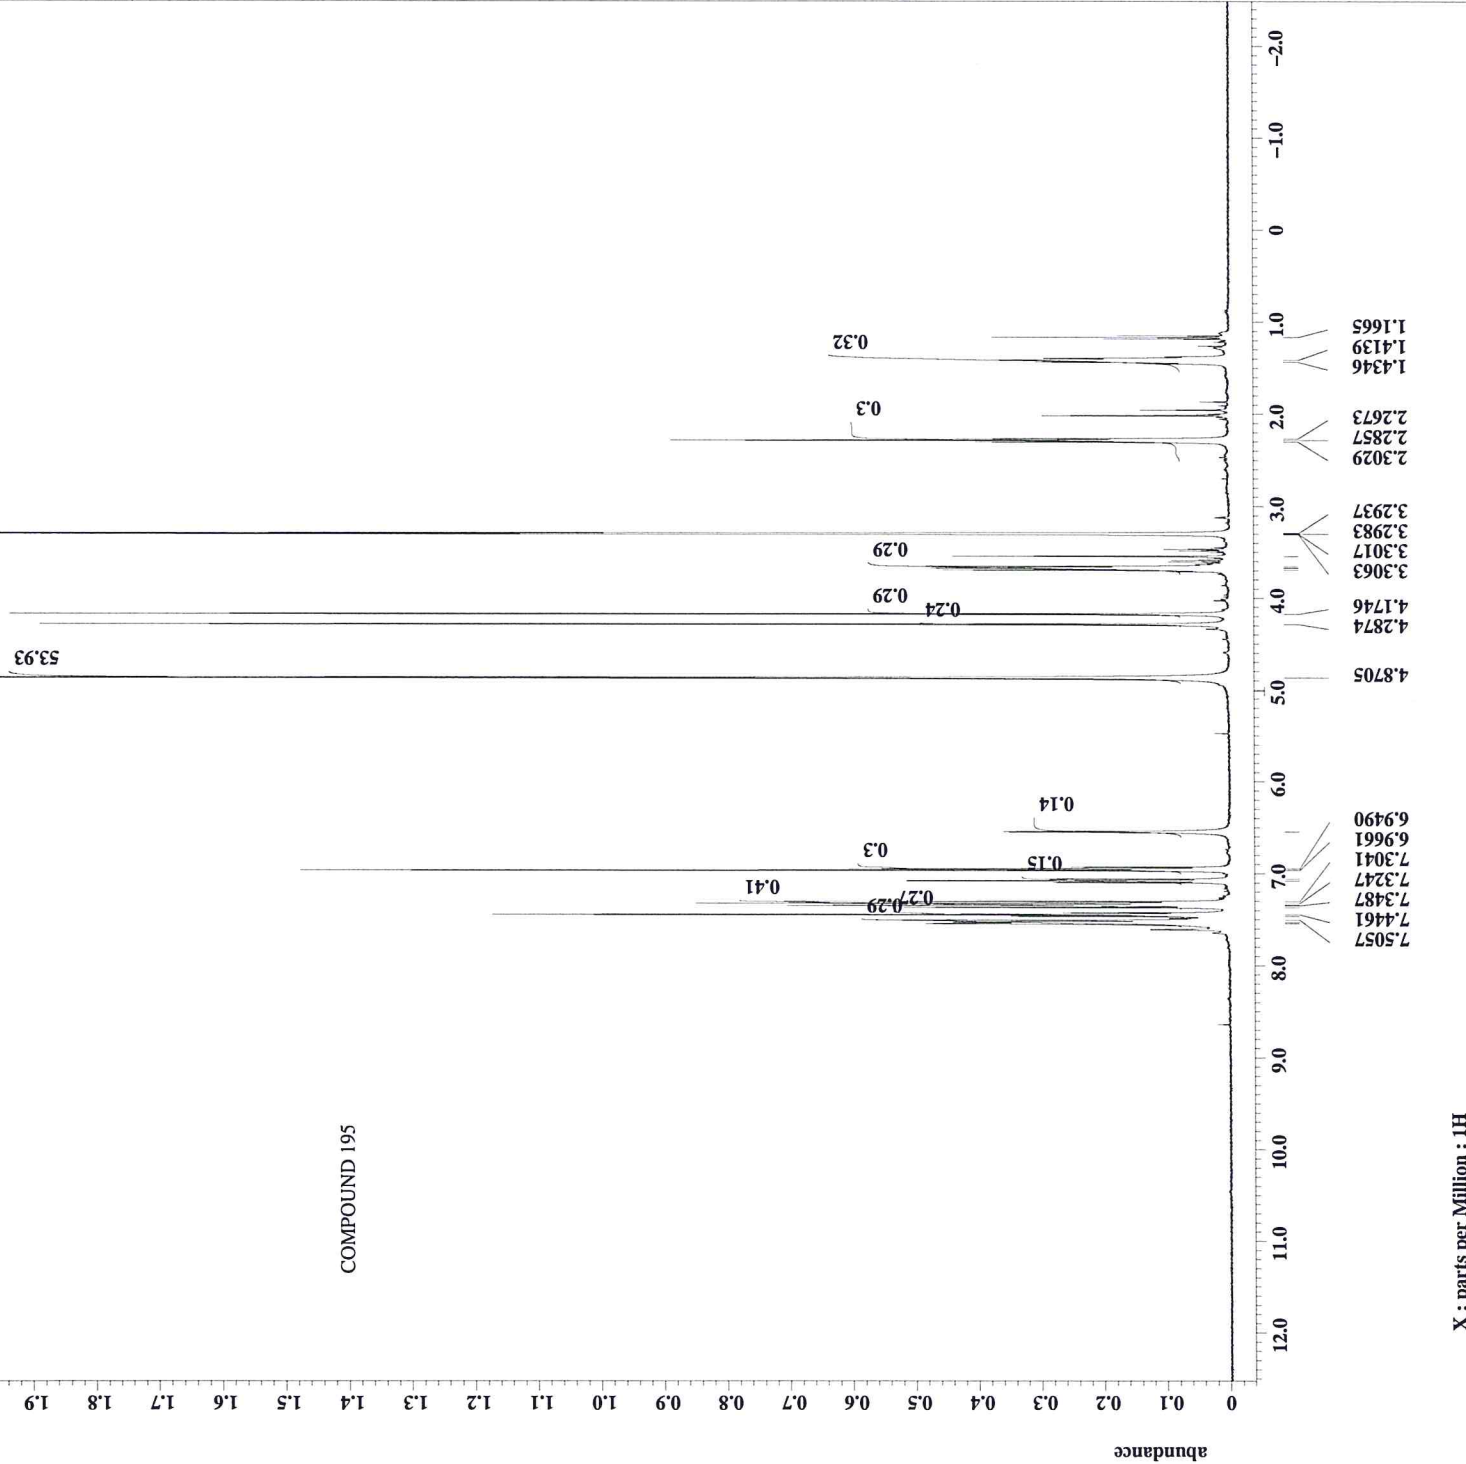

X : parts per Million : 1H



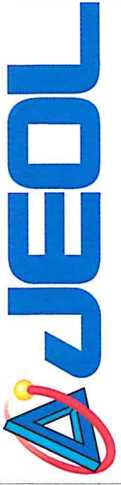

Filename = MM-I-66\_CARBON-6.jdf  
Author = Delta  
Experiment = single\_pulse\_dec  
Sample\_id = MM-I-66  
Solvent = METHANOL-D3  
Creation\_time = 10-NOV-2016 07:36:19  
Revision\_time = 11-MAR-2021 10:57:06  
Current\_time = 11-MAR-2021 10:57:10  
Data\_format = 1D COMPLEX  
Dim\_size = 26214  
Dim\_title = 13C  
Dim\_units = [ppm]  
Dimensions = X  
Site = ECS 400  
Spectrometer = JNM-ECS400  
Field\_strength = 9.389766[T] (400 [MHz])  
X\_acq\_duration = 1.04333312[s]  
X\_domain = 13C  
X\_freq = 100.52530333 [MHz]  
X\_offset = 100 [ppm]  
X\_points = 32768  
X\_prescans = 4  
X\_resolution = 0.95846665 [Hz]  
X\_sweep = 31.40703518 [kHz]  
Irr\_domain = 1H  
Irr\_freq = 399.78219838 [MHz]  
Irr\_offset = TRUE  
Clipped = TRUE  
Mod\_return = 1  
Scans = 12683  
Total\_scans = 12683  
X\_90\_width = 12.84 [us]  
X\_acq\_time = 1.04333312 [s]  
X\_angle = 30 [deg]  
X\_atn = 9 [dB]  
X\_pulse = 4.28 [us]  
Irr\_atn\_dec = 27 [dB]  
Irr\_atn\_noe = 27 [dB]  
Irr\_noise = WALTZ  
Decoupling = TRUE  
Initial\_wait = 1 [s]  
Noe = TRUE  
Noe\_time = 3 [s]  
Recvr\_gain = 60  
Relaxation\_delay = 3 [s]  
Repetition\_time = 4.04333312 [s]  
Temp\_get = 22 [dC]

COMPOUND 195

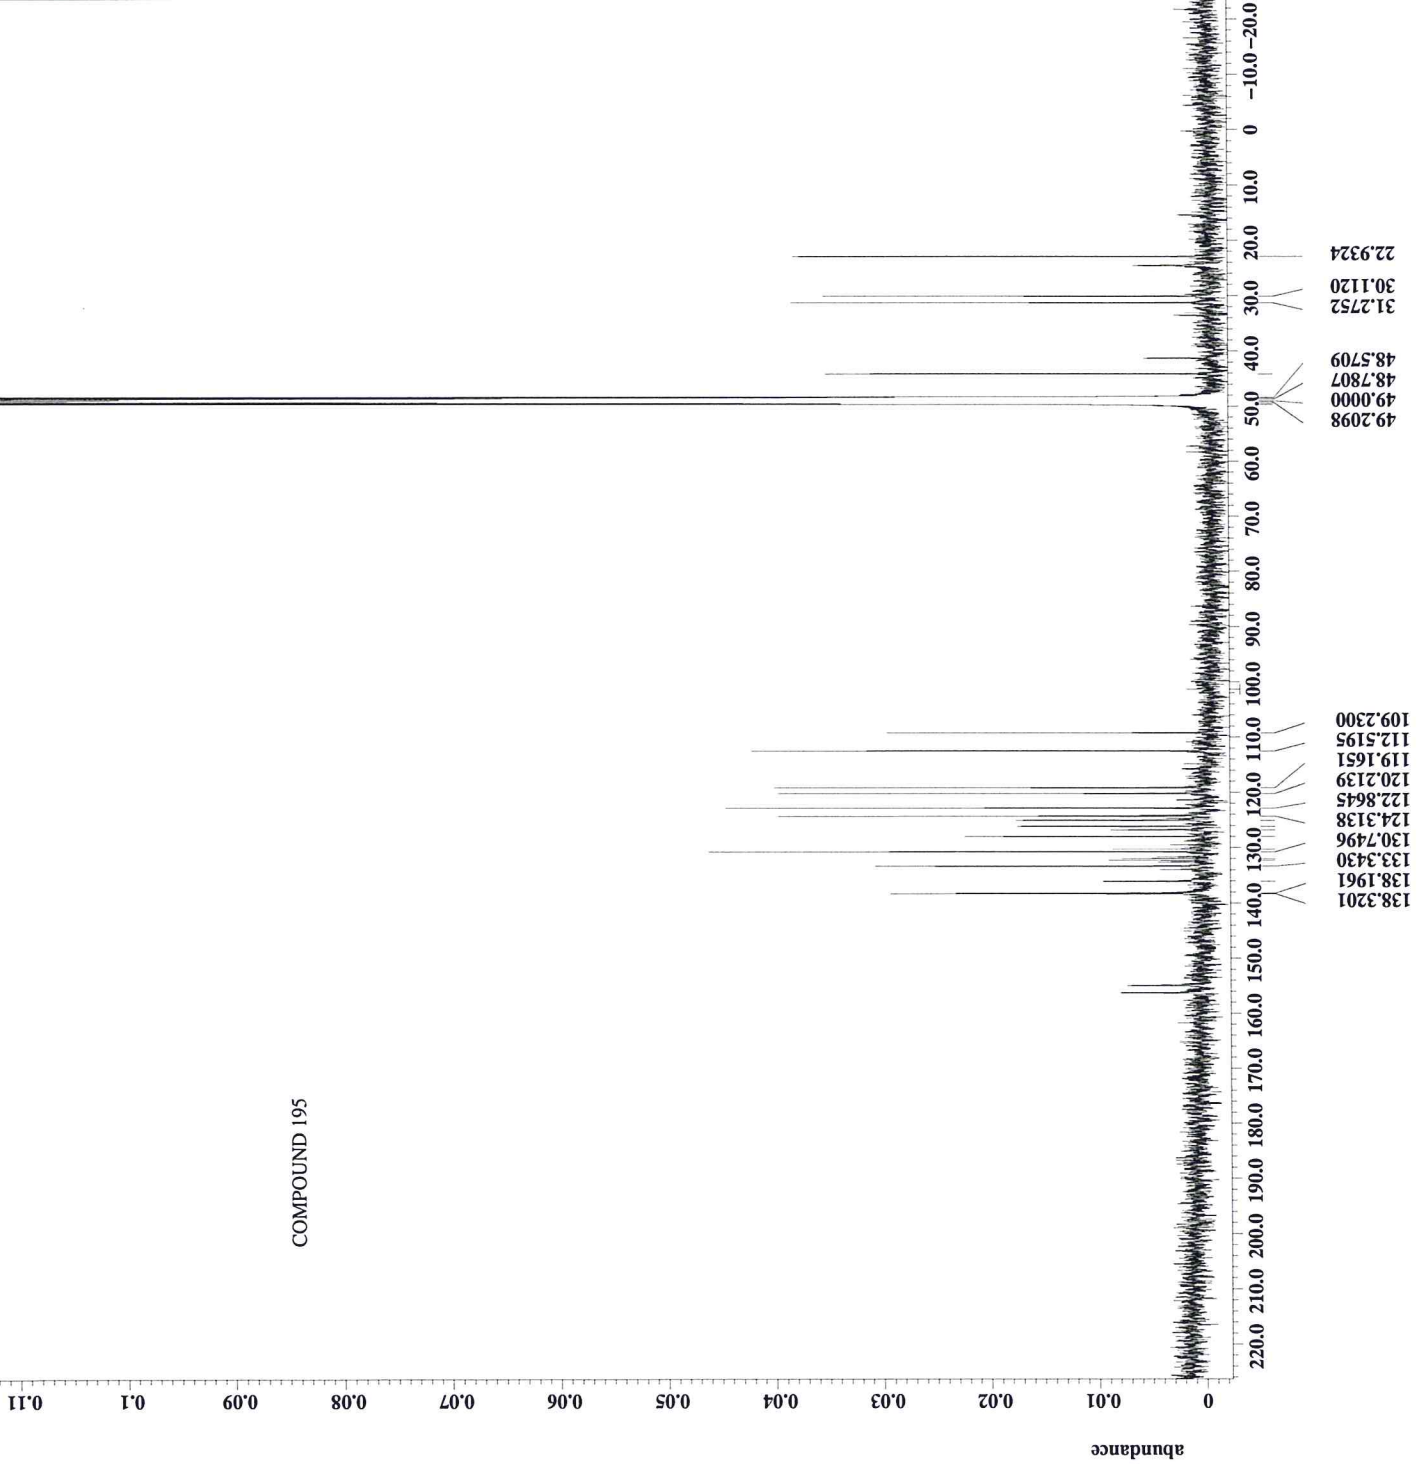

X : parts per Million : 13C

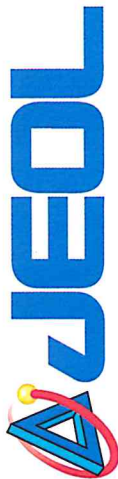

Filename = MM-I-87\_PROTON-5.jdf  
Author = Delta  
Experiment = single\_pulse.ex2  
Sample\_id = MM-I-87  
Solvent = METHANOL-D3  
Creation\_time = 16-FEB-2017 17:24:42  
Revision\_time = 15-MAR-2021 15:27:16  
Current\_time = 15-MAR-2021 15:27:18  
Data\_format = 1D COMPLEX  
Dim\_size = 13107  
Dim\_title = 1H  
Dim\_units = [ppm]  
Dimensions = X  
Site = ECS 400  
Spectrometer = JNM-ECS400  
Field\_strength = 9.389766 [T] (400 [MHz])  
X\_acq\_duration = 2.18365952 [s]  
X\_domain = 1H  
X\_freq = 399.78219838 [MHz]  
X\_offset = 5 [ppm]  
X\_points = 16384  
X\_prescans = 1  
X\_resolution = 0.45794685 [Hz]  
X\_sweep = 7.5030012 [kHz]  
Irr\_domain = 1H  
Irr\_freq = 399.78219838 [MHz]  
Irr\_offset = 5 [ppm]  
Tri\_domain = 1H  
Tri\_freq = 399.78219838 [MHz]  
Tri\_offset = 5 [ppm]  
Clipped = FALSE  
Mod\_return = 1  
Scans = 16  
Total\_scans = 16  
X\_90\_width = 10.68 [us]  
X\_acq\_time = 2.18365952 [s]  
X\_angle = 45 [deg]  
X\_atn = 6 [dB]  
X\_pulse = 5.34 [us]  
Irr\_mode = Off  
Tri\_mode = Off  
Dante\_presat = FALSE  
Initial\_wait = 1 [s]  
Recvr\_gain = 46  
Relaxation\_delay = 4 [s]  
Repetition\_time = 6.18365952 [s]  
Temp\_get = 17.1 [dC]

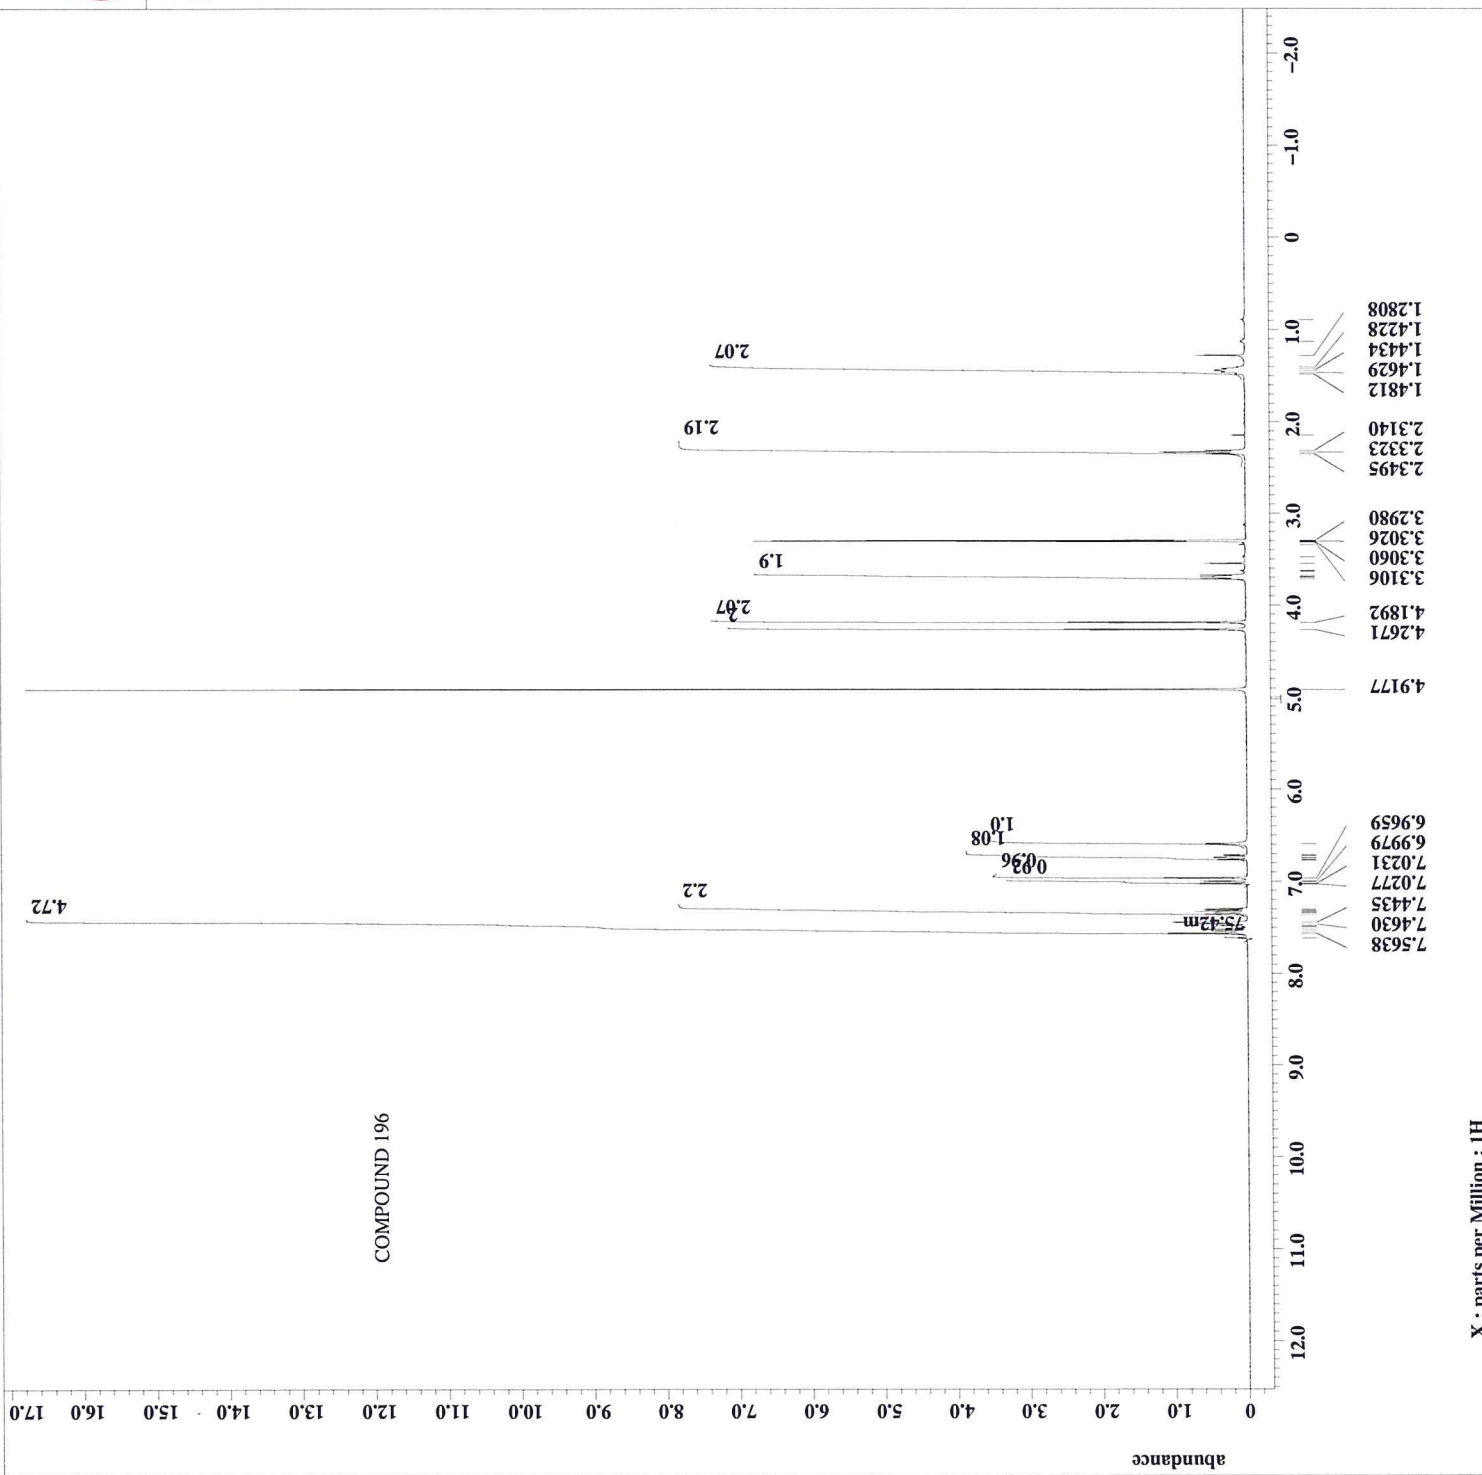

X : parts per Million : 1H

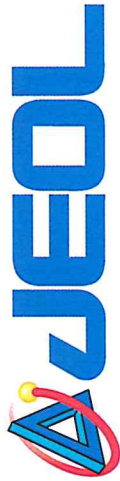

Filename = MM-I-87\_CARBON-5.jdf  
Author = Delta  
Experiment = single\_pulse\_dec  
Sample\_id = MM-I-87  
Solvent = METHANOL-D3  
Creation\_time = 17-FEB-2017 05:17:17  
Revision\_time = 15-MAR-2021 15:29:37  
Current\_time = 15-MAR-2021 15:29:31  
Data\_format = 1D COMPLEX  
Dim\_size = 26214  
Dim\_title = 13C  
Dim\_units = [ppm]  
Dimensions = X  
Site = ECS 400  
Spectrometer = JNM-ECS400  
Field\_strength = 9.389766[T] (400 [MHz])  
X\_acq\_duration = 1.04333312[s]  
X\_domain = 13C  
X\_freq = 100.52530333 [MHz]  
X\_offset = 100 [ppm]  
X\_points = 32768  
X\_prescans = 4  
X\_resolution = 0.95846665 [Hz]  
X\_sweep = 31.40703518 [kHz]  
Irr\_domain = 1H  
Irr\_freq = 399.78219838 [MHz]  
Irr\_offset = 5 [ppm]  
Clipped = FALSE  
Mod\_return = 1  
Total\_scans = 14000  
X\_90\_width = 12.84 [us]  
X\_acq\_time = 1.04333312 [s]  
X\_angle = 30 [deg]  
X\_atn = 9 [dB]  
X\_pulse = 4.28 [us]  
Irr\_atn\_dec = 27 [dB]  
Irr\_atn\_noe = 27 [dB]  
Irr\_noise = WALTZ  
Decoupling = TRUE  
Initial\_wait = 1 [s]  
Noe = TRUE  
Noe\_time = 2 [s]  
Recvr\_gain = 60  
Relaxation\_delay = 2 [s]  
Repetition\_time = 3.04333312 [s]  
Temp\_get = 19.2 [dC]

COMPOUND 196

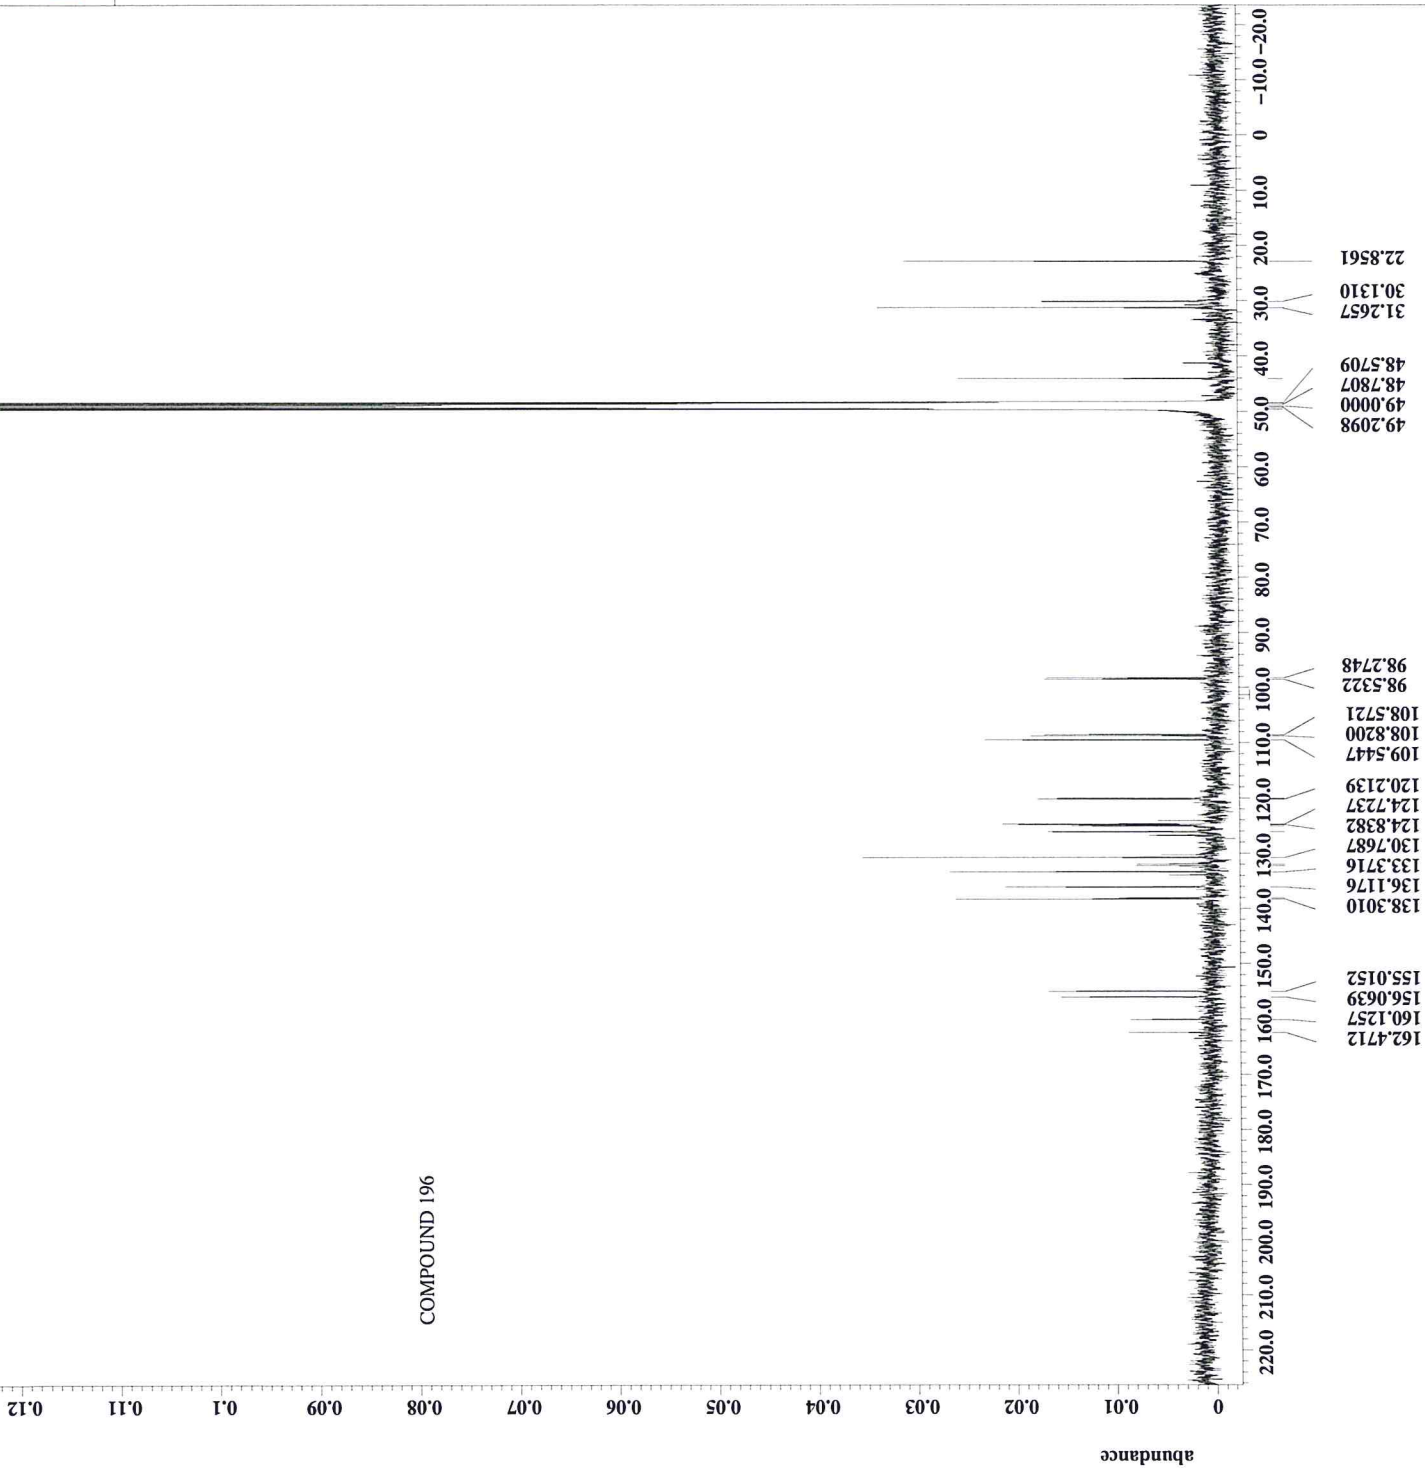

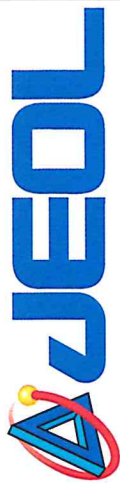

Filename = SK-I-57\_PROTON-5.jdf  
Author = Delta  
Experiment = single\_pulse.ex2  
Sample\_id = SK-I-57  
Solvent = METHANOL-D3  
Creation\_time = 6-JUN-2017 12:10:18  
Revision\_time = 12-MAR-2021 10:51:13  
Current\_time = 12-MAR-2021 10:51:30  
Data\_format = 1D COMPLEX  
Dim\_size = 13107  
Dim\_title = 1H  
Dim\_units = [ppm]  
Dimensions = X  
Site = ECS 400  
Spectrometer = JNM-ECS400  
Field\_strength = 9.389766[T] (400[MHz])  
X\_acq\_duration = 2.18365952[s]  
X\_domain = 1H  
X\_freq = 399.78219838[MHz]  
X\_offset = 5[ppm]  
X\_points = 16384  
X\_prescans = 1  
X\_resolution = 0.45794685[Hz]  
X\_sweep = 7.5030012[kHz]  
Irr\_domain = 1H  
Irr\_freq = 399.78219838[MHz]  
Irr\_offset = 5[ppm]  
Tri\_domain = 1H  
Tri\_freq = 399.78219838[MHz]  
Tri\_offset = 5[ppm]  
Clipped = FALSE  
Mod\_return = 1  
Scans = 16  
Total\_scans = 16  
X\_90\_width = 10.68[us]  
X\_acq\_time = 2.18365952[s]  
X\_angle = 45[deg]  
X\_atn = 6[db]  
X\_pulse = 5.34[us]  
Irr\_mode = Off  
Tri\_mode = Off  
Dante\_presat = FALSE  
Initial\_wait = 1[s]  
Recvr\_gain = 46  
Relaxation\_delay = 4[s]  
Repetition\_time = 6.18365952[s]  
Temp\_get = 460.0[dc]

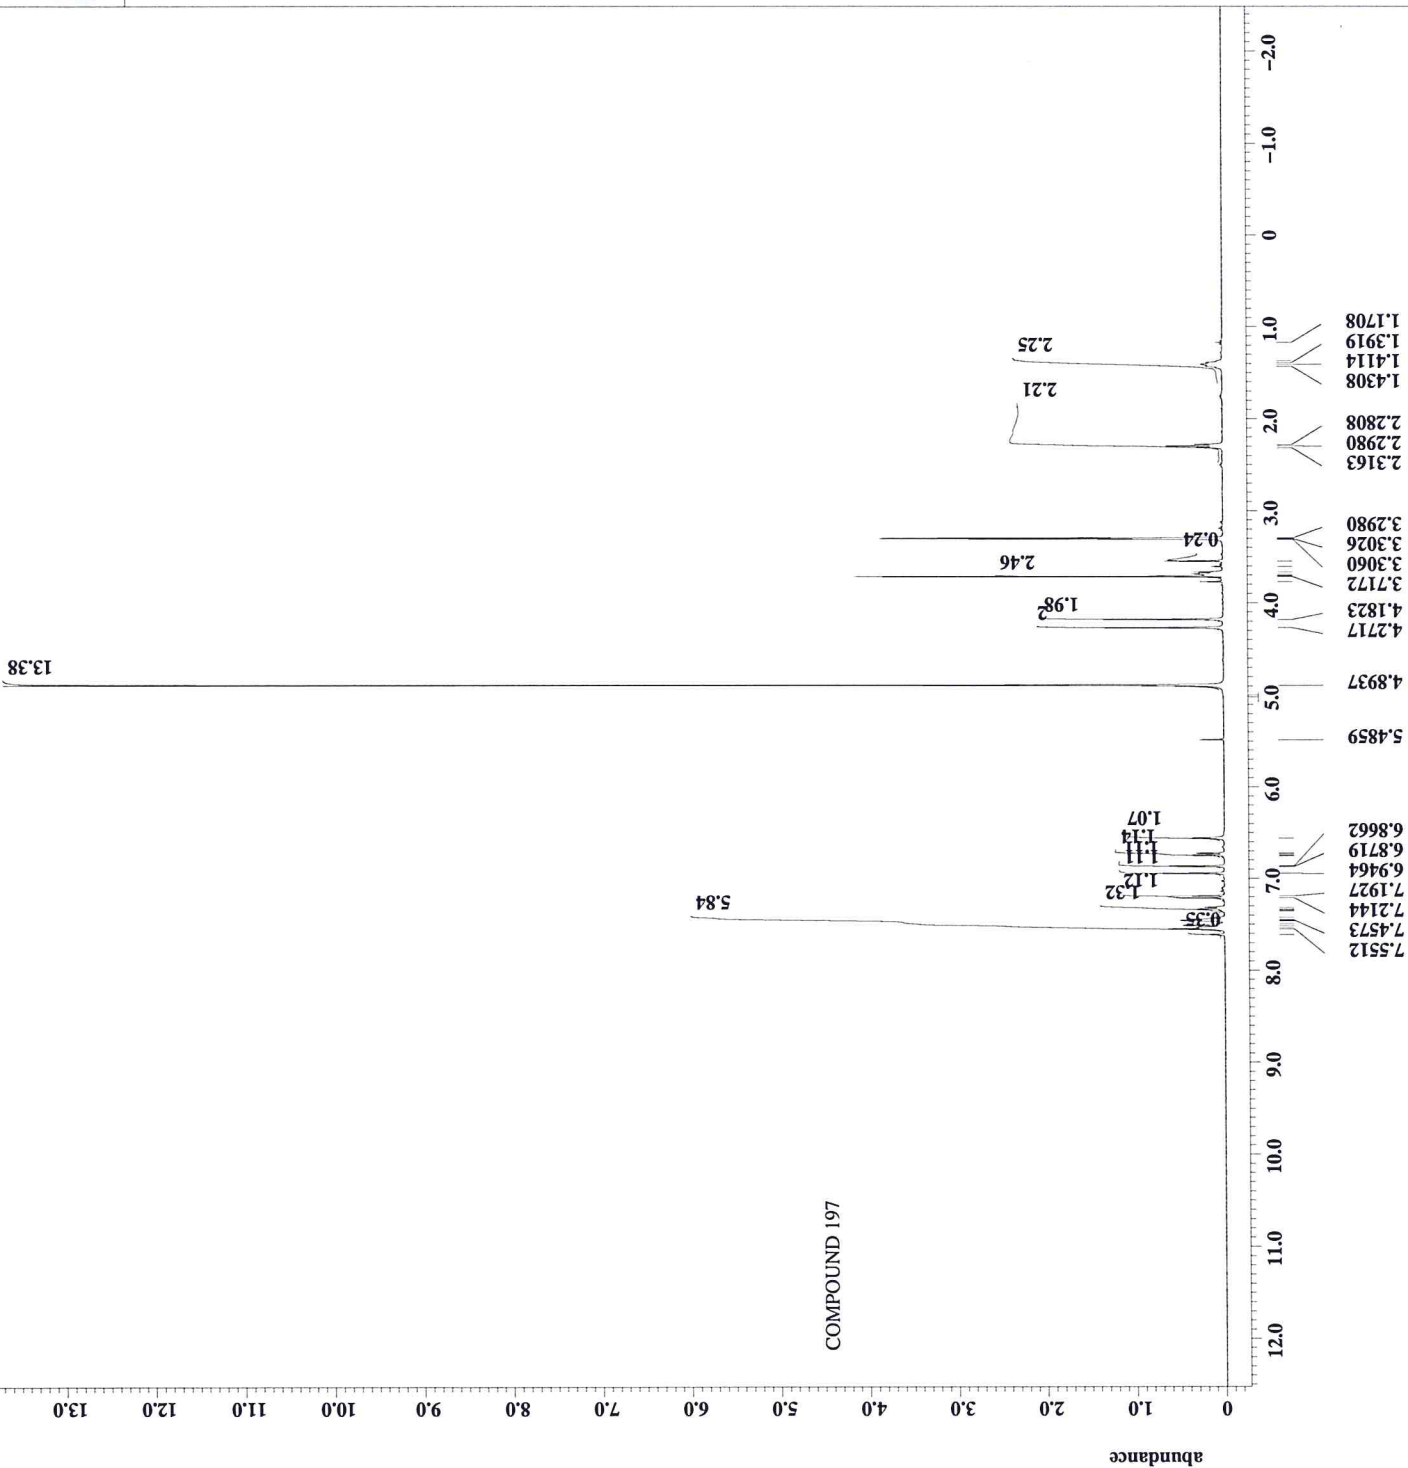

X : parts per Million : 1H



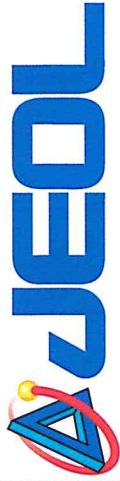

File name = SK-I-57-overnight\_CAR  
Author = Delta  
Experiment = single\_pulse\_dec  
Sample\_id = SK-I-57-overnight  
Solvent = METHANOL-D3  
Creation\_time = 9-JUN-2017 07:54:55  
Revision\_time = 12-MAR-2021 09:59:10  
Current\_time = 12-MAR-2021 09:59:15  
Data\_format = 1D COMPLEX  
Dim\_size = 26214  
Dim\_title = 13C  
Dim\_units = [ppm]  
Dimensions = X  
Site = ECS 400  
Spectrometer = JNM-ECS400  
Field\_strength = 9.389766[T] (400 [MHz])  
X\_acq\_duration = 1.04333312[s]  
X\_domain = 13C  
X\_freq = 100.52530333 [MHz]  
X\_offset = 100 [ppm]  
X\_points = 32768  
X\_prescans = 4  
X\_resolution = 0.95846665 [Hz]  
X\_sweep = 31.40703518 [kHz]  
Irr\_domain = 1H  
Irr\_freq = 399.78219838 [MHz]  
Irr\_offset = 5 [ppm]  
Clipped = FALSE  
Mod\_return = 1  
Total\_scans = 18845  
X\_90\_width = 12.84 [us]  
X\_acq\_time = 1.04333312 [s]  
X\_angle = 30 [deg]  
X\_atn = 9 [dB]  
X\_pulse = 4.28 [us]  
Irr\_atn\_dec = 27 [dB]  
Irr\_atn\_noe = 27 [dB]  
Irr\_noise = WALTZ  
Decoupling = TRUE  
Initial\_wait = 1 [s]  
Noe = TRUE  
Noe\_time = 2 [s]  
Recvr\_gain = 60  
Relaxation\_delay = 2 [s]  
Repetition\_time = 3.04333312 [s]  
Temp\_get = 460.0 [dC]

COMPOUND 197

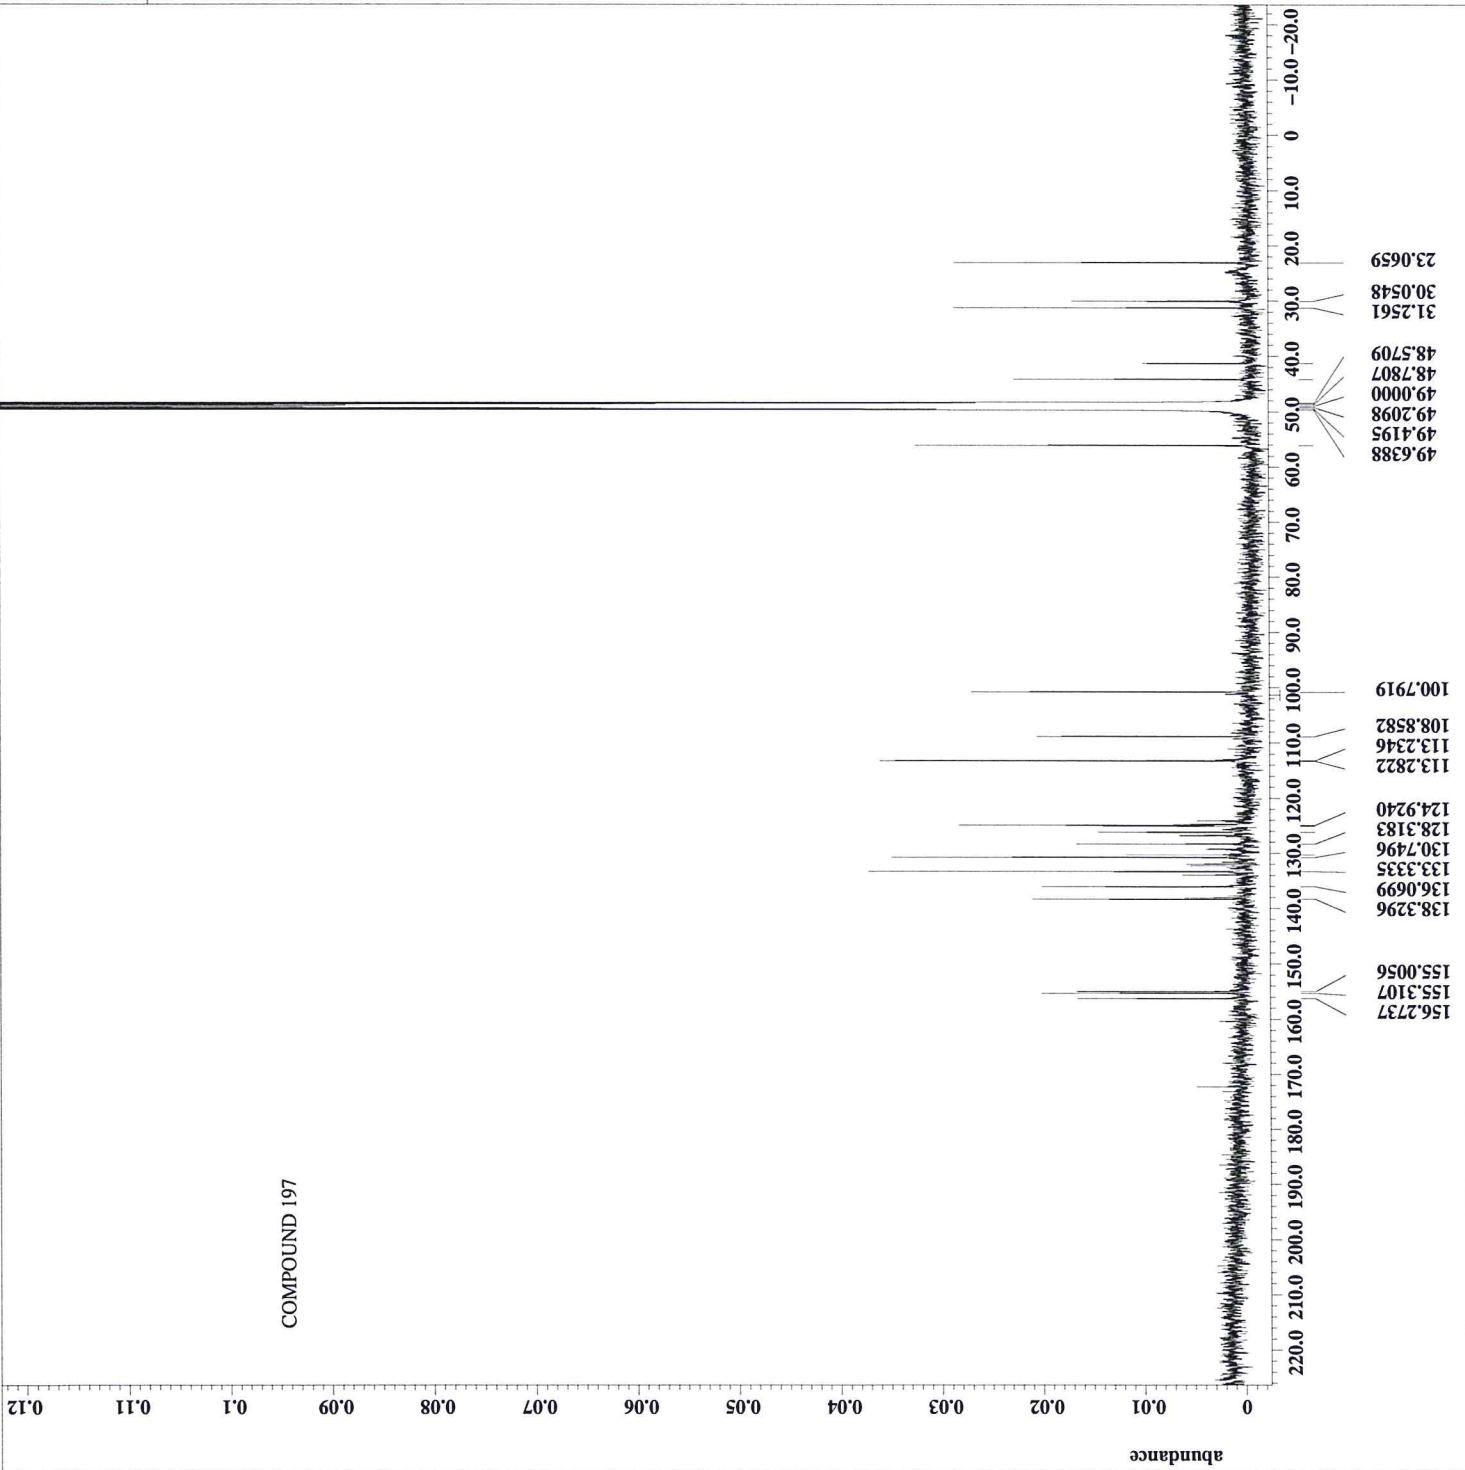

X : parts per Million : 13C

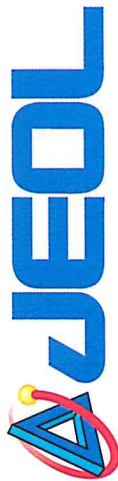

```

Filename = RF-I-16-METHANOL_PROT
Author = Delta
Experiment = single_pulse.ex2
Sample_id = RF-I-16-METHANOL
Solvent = METHANOL-D3
Creation_time = 20-FEB-2019 15:36:46
Revision_time = 17-MAR-2021 11:24:17
Current_time = 17-MAR-2021 11:24:22

Data_format = 1D COMPLEX
Dim_size = 13107
Dim_title = 1H
Dim_units = [ppm]
Dimensions = X
Site = EGS 400
Spectrometer = JNM-ECS400

Field_strength = 9.389766 [T] (400 [MHz])
X_acq_duration = 2.18365952 [s]
X_domain = 1H
X_freq = 399.78219838 [MHz]
X_offset = 5 [ppm]
X_points = 16384
X_prescans = 1
X_resolution = 0.45794685 [Hz]
X_sweep = 7.5030012 [kHz]
Irr_domain = 1H
Irr_freq = 399.78219838 [MHz]
Irr_offset = 5 [ppm]
Tri_domain = 1H
Tri_freq = 399.78219838 [MHz]
Tri_offset = 5 [ppm]
Clipped = FALSE
Mod_return = 1
Scans = 4
Total_scans = 4

X_90_width = 11.365 [us]
X_acq_time = 2.18365952 [s]
X_angle = 45 [deg]
X_atn = 6 [dB]
X_pulse = 5.6825 [us]
Irr_mode = Off
Tri_mode = Off
Dante_presat = FALSE
Initial_wait = 1 [s]
Recvr_gain = 50
Relaxation_delay = 4 [s]
Repetition_time = 6.18365952 [s]
Temp_get = 17.6 [dC]
  
```

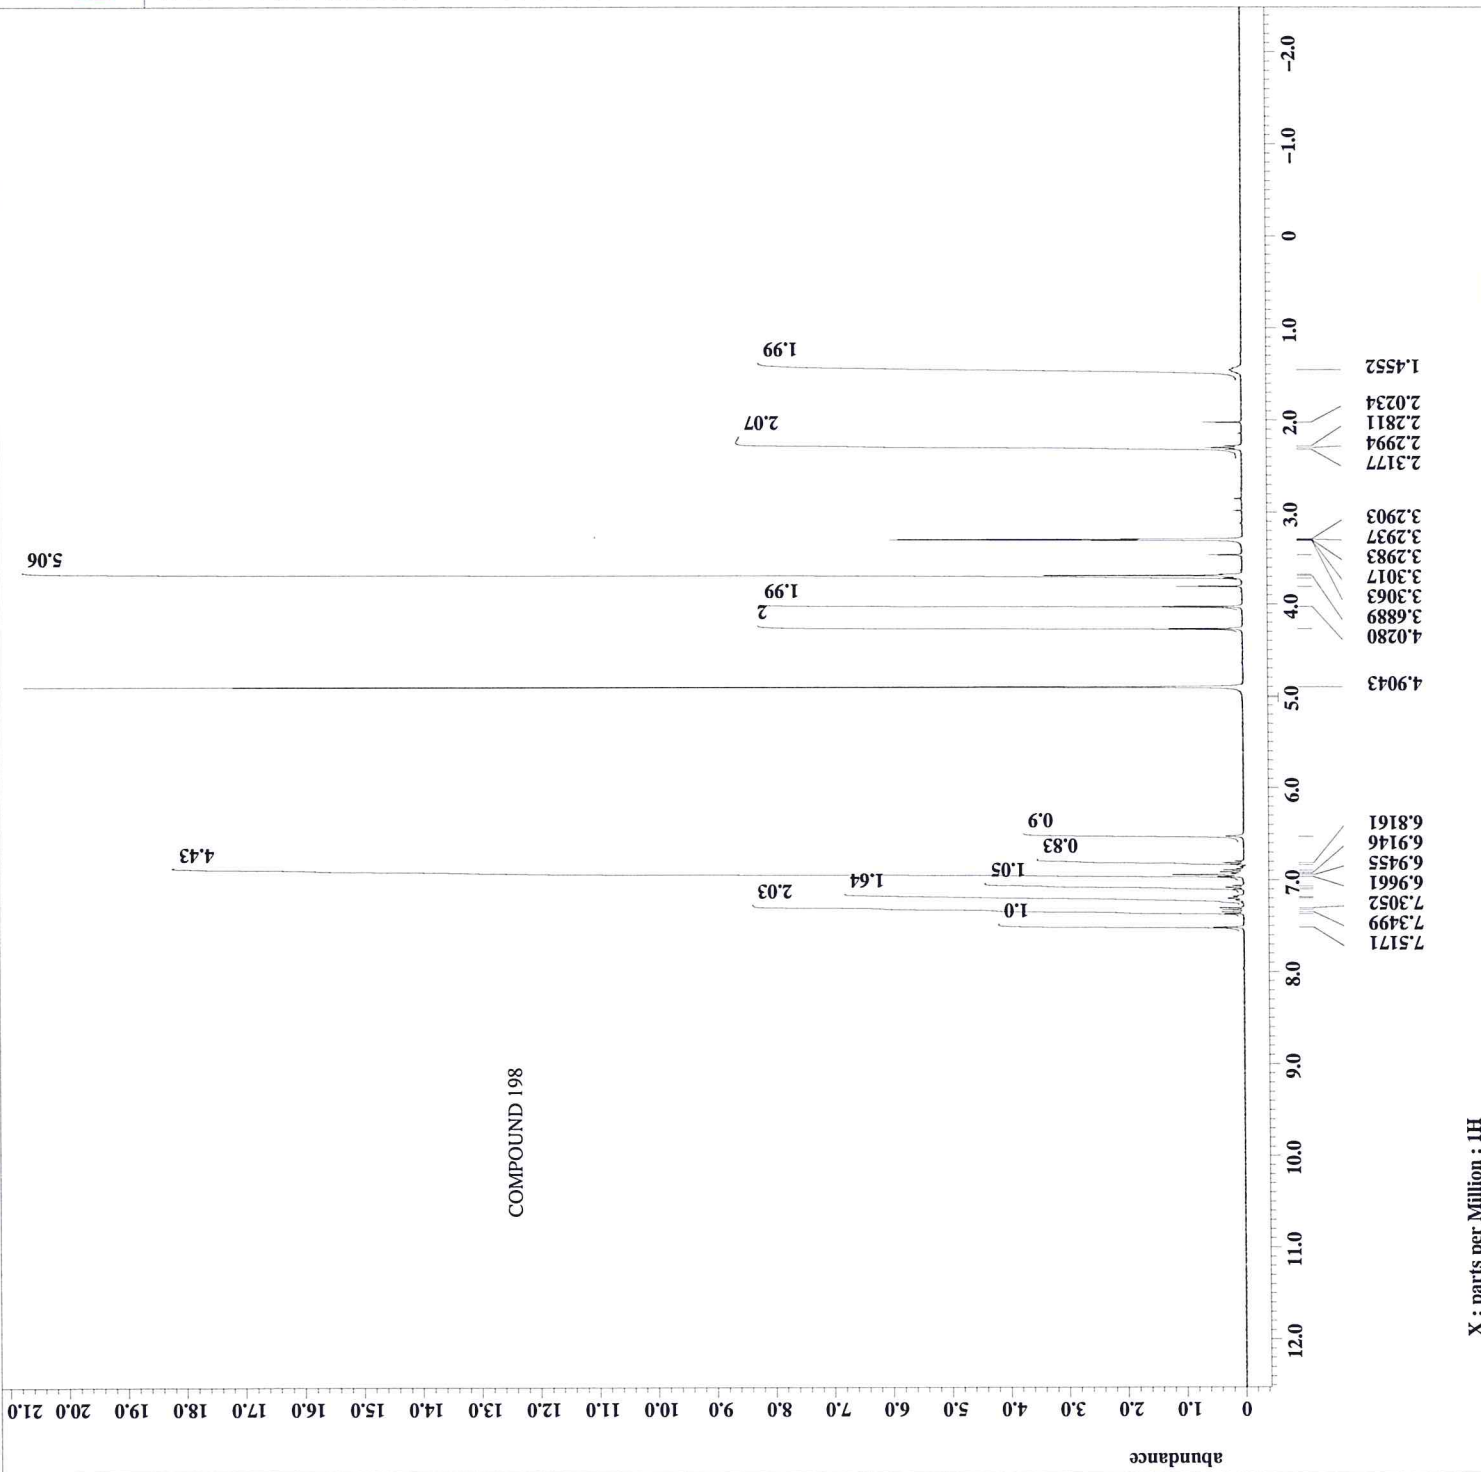

X : parts per Million : 1H

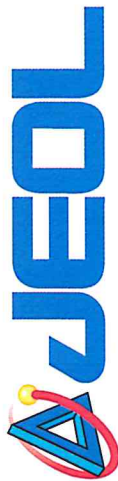

Filename = RF-I-16-METHANOL\_CARB  
Author = Delta  
Experiment = single\_pulse\_dec  
Sample\_id = RF-I-16-METHANOL  
Solvent = METHANOL-D3  
Creation\_time = 21-FEB-2019 07:42:09  
Revision\_time = 17-MAR-2021 11:27:06  
Current\_time = 17-MAR-2021 11:27:15  
Data\_format = 1D COMPLEX  
Dim\_size = 26214  
Dim\_title = 13C  
Dim\_units = [ppm]  
Dimensions = X  
Site = ECS 400  
Spectrometer = JNM-ECS400  
Field\_strength = 9.389766 [T] (400 [MHz])  
X\_acq\_duration = 1.04333312 [s]  
X\_domain = 13C  
X\_freq = 100.52530333 [MHz]  
X\_points = 32768  
X\_prescans = 4  
X\_resolution = 0.95846665 [kHz]  
X\_sweep = 31.40703518 [kHz]  
Irr\_domain = 1H  
Irr\_freq = 399.78219838 [MHz]  
Irr\_offset = FALSE  
Clipped = FALSE  
Mod\_return = 1  
Scans = 14275  
Total\_scans = 14275  
X\_90\_width = 10.4 [us]  
X\_acq\_time = 1.04333312 [s]  
X\_angle = 30 [deg]  
X\_atn = 9 [dB]  
X\_pulse = 3.465666667 [us]  
Irr\_atn\_dec = 24.2 [dB]  
Irr\_atn\_noe = 24.2 [dB]  
Irr\_noise = WALTZ  
Decoupling = TRUE  
Initial\_wait = 1 [s]  
Noe = TRUE  
Noe\_time = 3 [s]  
Recvr\_gain = 58  
Relaxation\_delay = 3 [s]  
Repetition\_time = 4.04333312 [s]  
Temp\_get = 17.9 [dc]

COMPOUND 198

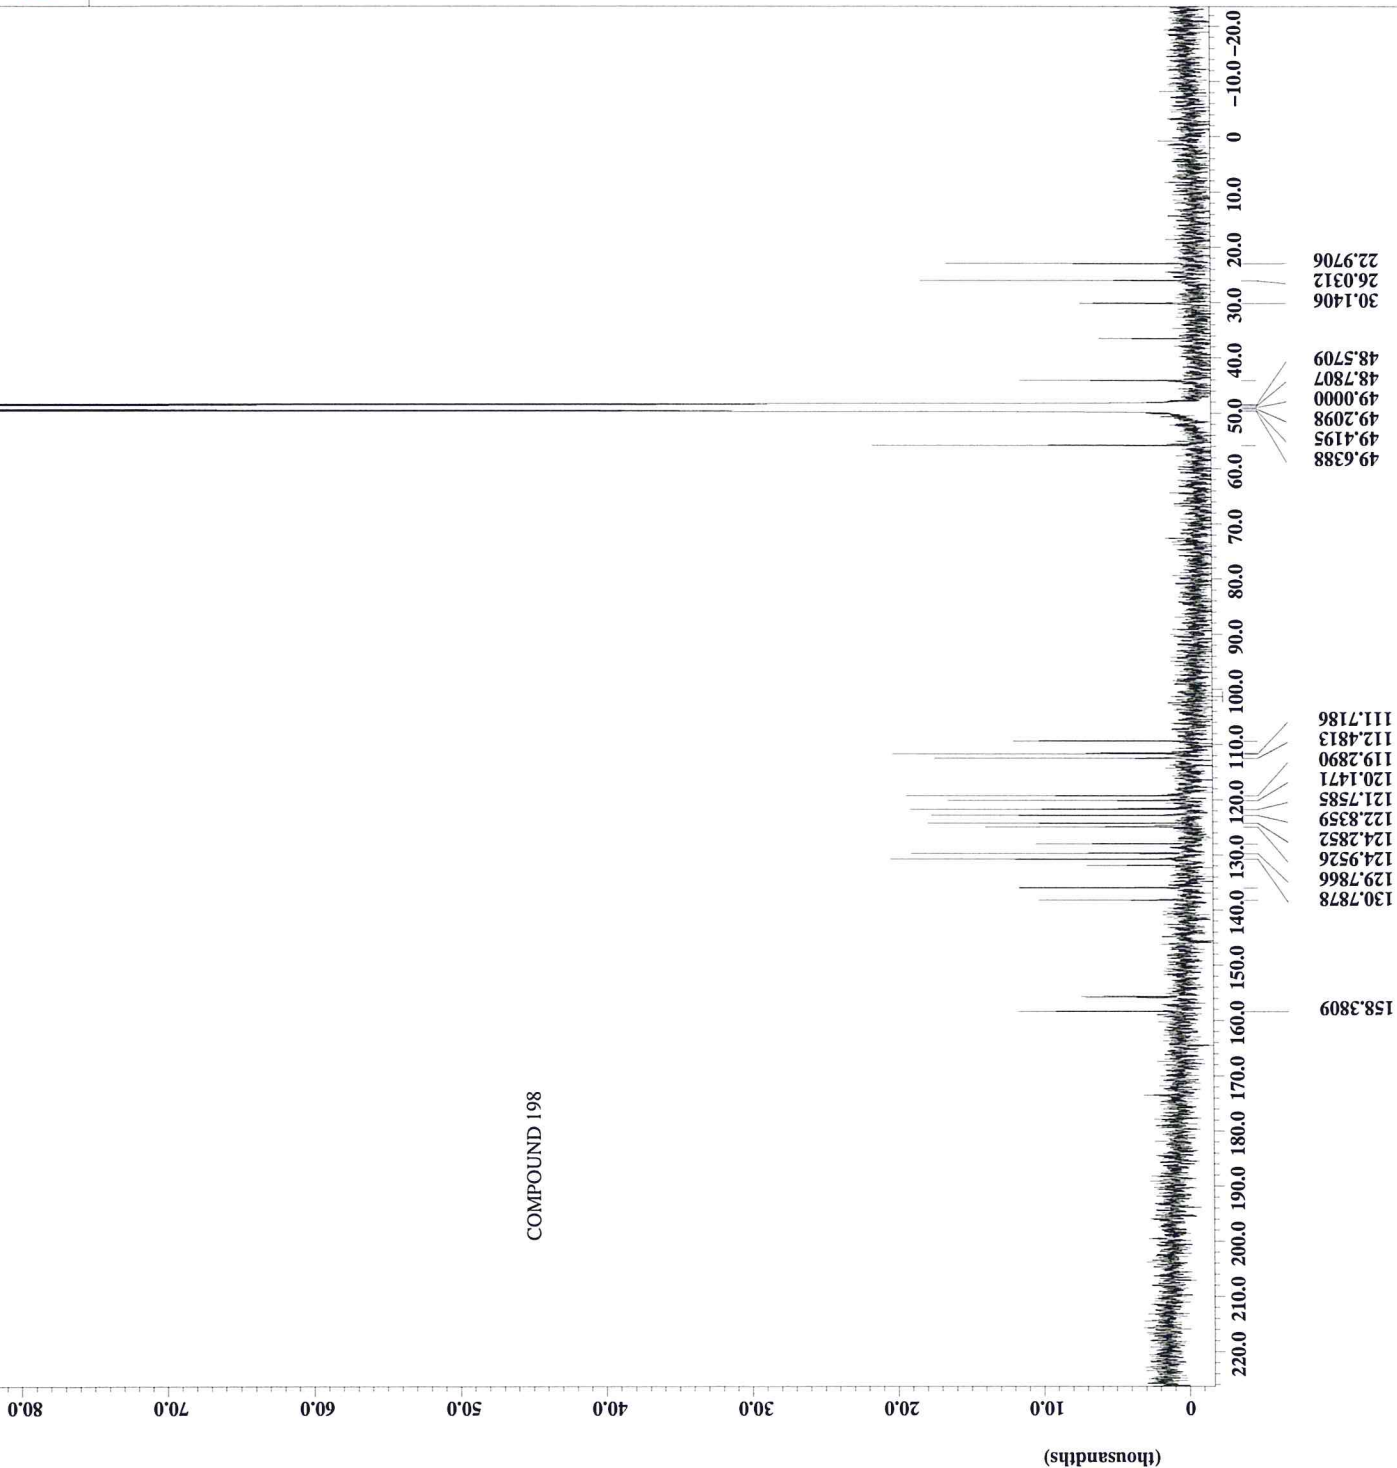

X : parts per Million : 13C

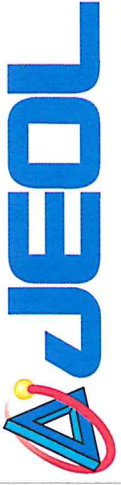

Filename = RF-I-34-METHANOL\_PROT  
Author = Delta  
Experiment = single\_pulse.ex2  
Sample\_id = RF-I-34-METHANOL  
Solvent = METHANOL-D3  
Creation\_time = 1-JUL-2019 15:17:28  
Revision\_time = 17-MAR-2021 13:07:43  
Current\_time = 17-MAR-2021 13:07:47  
Data\_format = 1D COMPLEX  
Dim\_size = 13107  
Dim\_title = 1H  
Dim\_units = [ppm]  
Dimensions = X  
Site = ECS 400  
Spectrometer = JNM-ECS400  
Field\_strength = 9.389766[T] (400 [MHz])  
X\_acq\_duration = 2.18365952[s]  
X\_domain = 1H  
X\_freq = 399.78219838 [MHz]  
X\_offset = 5 [ppm]  
X\_points = 16384  
X\_prescans = 1  
X\_resolution = 0.45794685 [Hz]  
X\_sweep = 7.5030012 [kHz]  
Irr\_domain = 1H  
Irr\_freq = 399.78219838 [MHz]  
Irr\_offset = 5 [ppm]  
Tri\_domain = 1H  
Tri\_freq = 399.78219838 [MHz]  
Tri\_offset = 5 [ppm]  
Clipped = FALSE  
Mod\_return = 1  
Scans = 8  
Total\_scans = 8  
X\_90\_width = 11.365 [us]  
X\_acq\_time = 2.18365952 [s]  
X\_angle = 45 [deg]  
X\_atn = 6 [dB]  
X\_pulse = 5.6825 [us]  
Irr\_mode = Off  
Tri\_mode = Off  
Dante\_preset = FALSE  
Initial\_wait = 1 [s]  
Recvr\_gain = 42  
Relaxation\_delay = 4 [s]  
Repetition\_time = 6.18365952 [s]  
Temp\_get = 19.9 [dC]

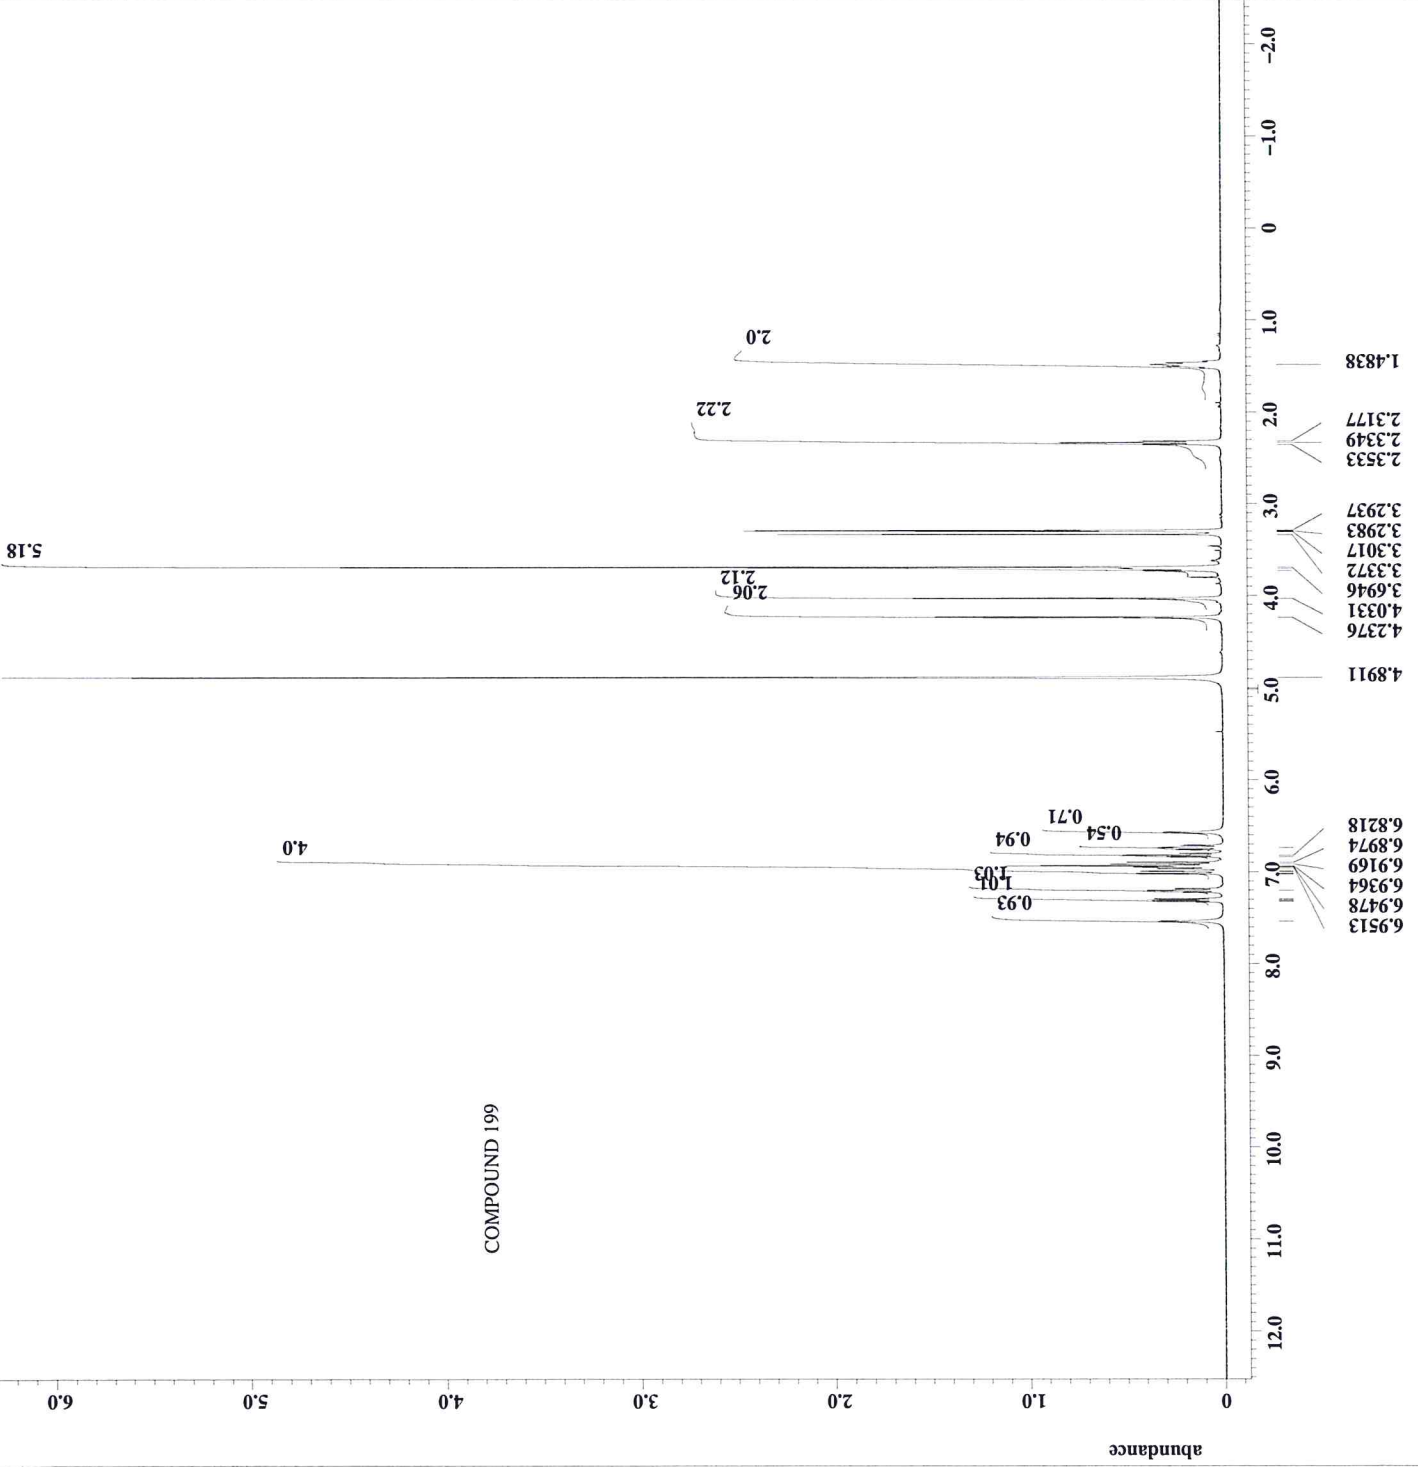

X : parts per Million : 1H



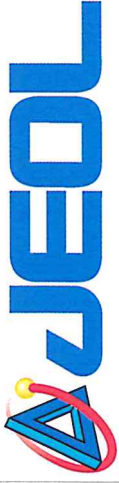

Filename = RF-I-34-METHANOL\_CARB  
Author = Delta  
Experiment = single\_pulse\_dec  
Sample\_id = RF-I-34-METHANOL  
Solvent = METHANOL-D3  
Creation\_time = 2-JUL-2019 06:33:57  
Revision\_time = 17-MAR-2021 13:16:54  
Current\_time = 17-MAR-2021 13:16:56  
Data\_format = 1D COMPLEX  
Dim\_size = 26214  
Dim\_title = 13C  
Dim\_units = [ppm]  
Dimensions = X  
Site = ECS 400  
Spectrometer = JNM-ECS400  
Field\_strength = 9.389766[T] (400 [MHz])  
X\_acq\_duration = 1.04333312[s]  
X\_domain = 13C  
X\_freq = 100.52530333 [MHz]  
X\_offset = 100 [ppm]  
X\_points = 32768  
X\_prescans = 4  
X\_resolution = 0.95846665 [Hz]  
X\_sweep = 31.40703518 [KHz]  
Irr\_domain = 1H  
Irr\_freq = 399.78219838 [MHz]  
Irr\_offset = 5 [ppm]  
Clipped = FALSE  
Mod\_return = 1  
Scans = 13573  
Total\_scans = 13573  
X\_90\_width = 10.4 [us]  
X\_acq\_time = 1.04333312 [s]  
X\_angle = 30 [deg]  
X\_atn = 9 [dB]  
X\_pulse = 3.46666667 [us]  
Irr\_atn\_dec = 24.2 [dB]  
Irr\_atn\_noe = 24.2 [dB]  
Irr\_noise = WALTZ  
Decoupling = TRUE  
Initial\_wait = 1 [s]  
Noe\_time = TRUE  
Noe\_time = 3 [s]  
Recvr\_gain = 58  
Relaxation\_delay = 3 [s]  
Repetition\_time = 4.04333312 [s]  
Temp\_get = 20.2 [dC]

COMPOUND 199

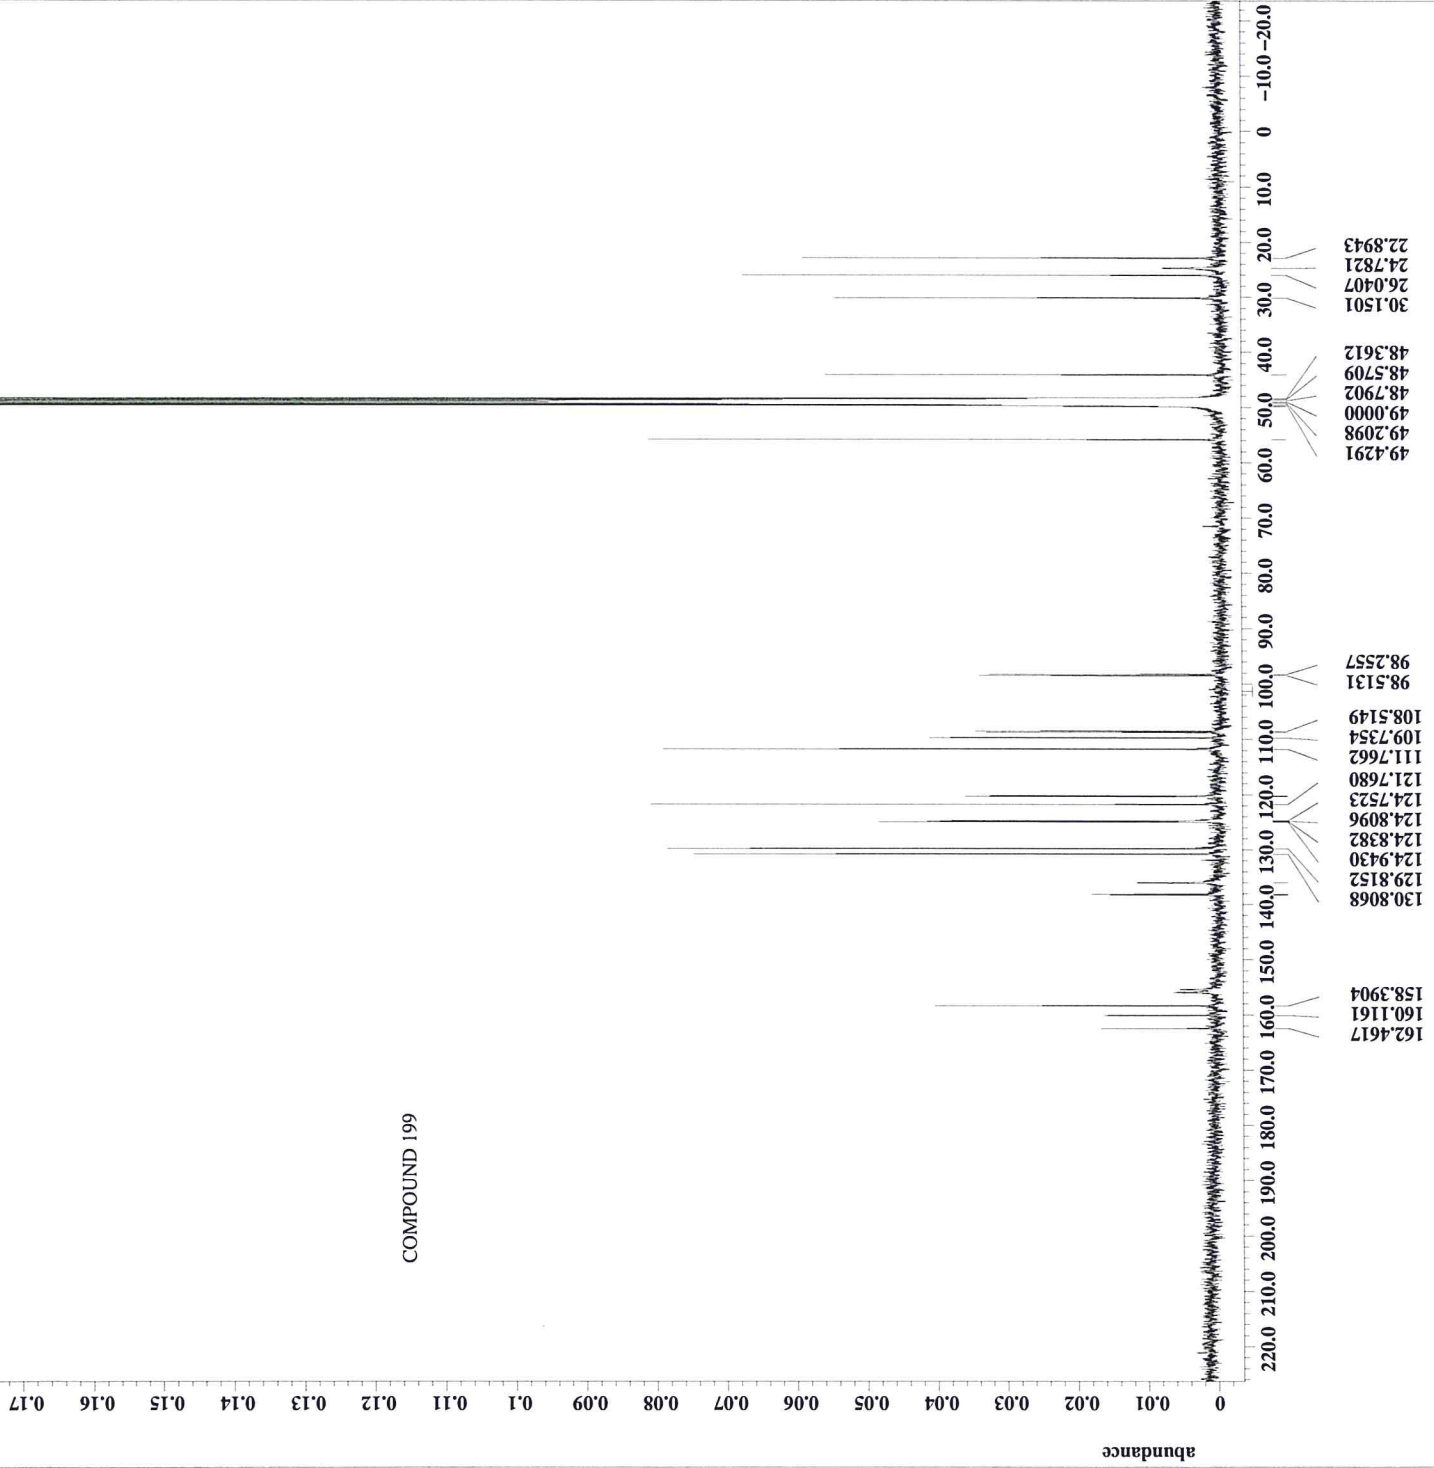

X : parts per Million : 13C

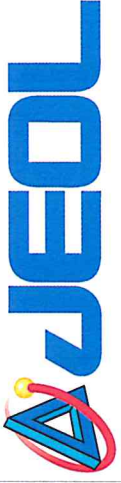

```

Filename = RE-I-23-METHANOL_PROT
Author = Delta
Experiment = single_pulse.ex2
Sample_id = RE-I-23-METHANOL
Solvent = METHANOL-D3
Creation_time = 7-MAR-2019 15:45:47
Revision_time = 17-MAR-2021 11:32:13
Current_time = 17-MAR-2021 11:32:17

Data_format = 1D COMPLEX
Dim_size = 13107
Dim_title = 1H
Dim_units = [ppm]
Dimensions = X
Site = ECS 400
Spectrometer = UNM-ECS400

Field_strength = 9.389766[T] (400 [MHz])
X_acq_duration = 2.18365952[s]
X_domain = 1H
X_freq = 399.78219838[MHz]
X_offset = 5[ppm]
X_points = 16384
X_prescans = 1
X_resolution = 0.45794685[Hz]
X_sweep = 7.5030012[kHz]
Irr_domain = 1H
Irr_freq = 399.78219838[MHz]
Irr_offset = 5[ppm]
Tri_domain = 1H
Tri_freq = 399.78219838[MHz]
Tri_offset = 5[ppm]
Clipped = FALSE
Mod_return = 1
Total_scans = 4

X_90_width = 11.365[us]
X_acq_time = 2.18365952[s]
X_angle = 45[deg]
X_atn = 6[db]
X_pulse = 5.6825[us]
Irr_mode = Off
Tri_mode = Off
Dante_presat = FALSE
Initial_wait = 1[s]
Recvr_gain = 46
Relaxation_delay = 4[s]
Repetition_time = 6.18365952[s]
Temp_get = 15.7[dc]
  
```

5.86

COMPOUND 200

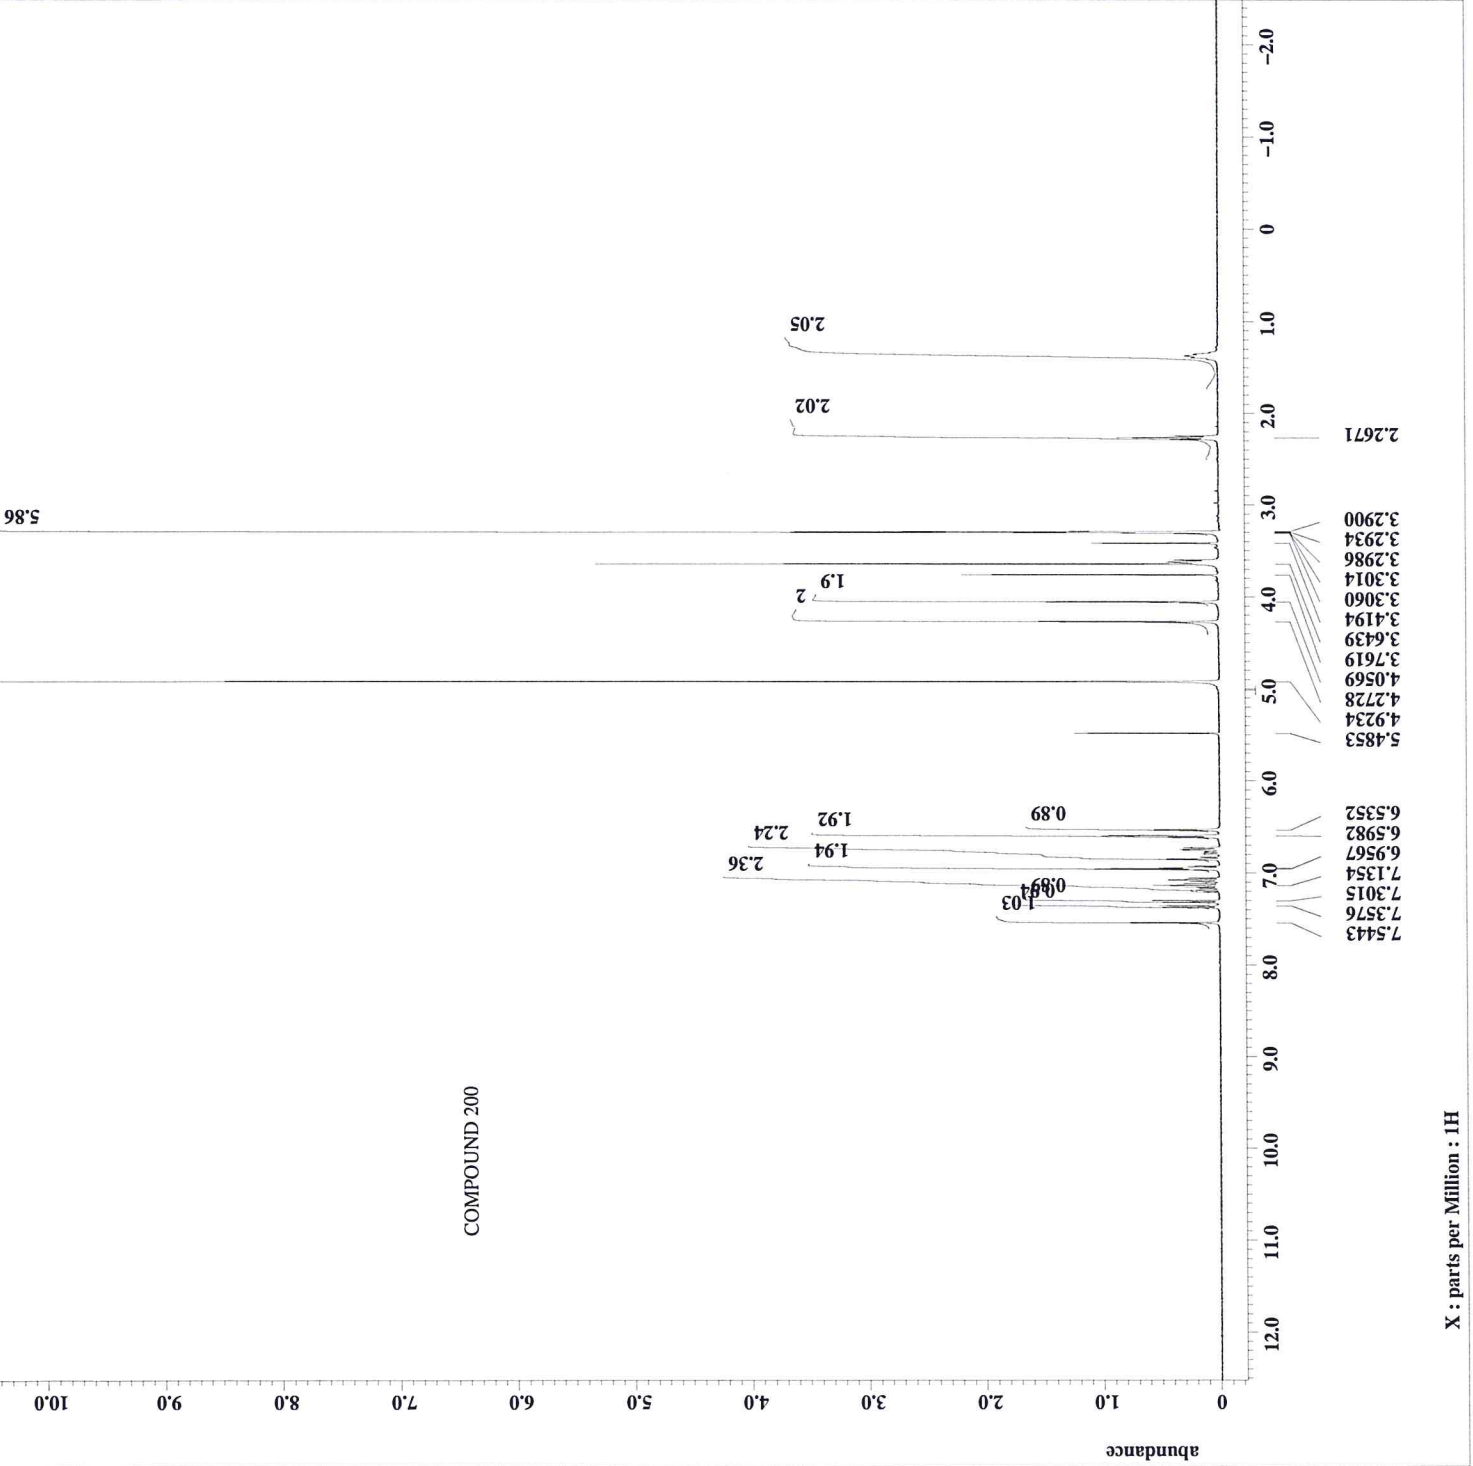

X : parts per Million : 1H

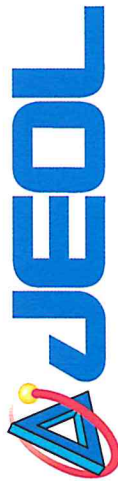

Filename = RE-I-23-METHANOL\_CARB  
Author = Delta  
Experiment = single\_pulse\_dec  
Sample\_id = RF-I-23-METHANOL  
Solvent = METHANOL-D3  
Creation\_time = 8-MAR-2019 07:46:23  
Revision\_time = 17-MAR-2021 11:34:16  
Current\_time = 17-MAR-2021 11:34:19  
Data\_format = 1D COMPLEX  
Dim\_size = 26214  
Dim\_title = 13C  
Dim\_units = [ppm]  
Dimensions = X  
Site = ECS 400  
Spectrometer = JNM-ECS400  
Field\_strength = 9.389766[T] (400 [MHz])  
X\_acq\_duration = 1.04333312[s]  
X\_domain = 13C  
X\_freq = 100.52530333 [MHz]  
X\_offset = 100 [ppm]  
X\_points = 32768  
X\_prescans = 4  
X\_resolution = 0.95846665 [Hz]  
X\_sweep = 31.40703518 [kHz]  
Irr\_domain = 1H  
Irr\_freq = 399.78219838 [MHz]  
Irr\_offset = TRUE  
Clipped = TRUE  
Mod\_return = 1  
Scans = 14201  
Total\_scans = 14201  
X\_90\_width = 10.4 [us]  
X\_acq\_time = 1.04333312 [s]  
X\_angle = 30 [deg]  
X\_atn = 9 [dB]  
X\_pulse = 3.46666667 [us]  
Irr\_atn\_dec = 24.2 [dB]  
Irr\_atn\_noe = 24.2 [dB]  
Irr\_noise = WALTZ  
Decoupling = TRUE  
Initial\_wait = 1 [s]  
Noe = TRUE  
Noe\_time = 3 [s]  
Recvr\_gain = 58  
Relaxation\_delay = 3 [s]  
Repetition\_time = 4.04333312 [s]  
Temp\_get = 16.6 [dC]

COMPOUND 200

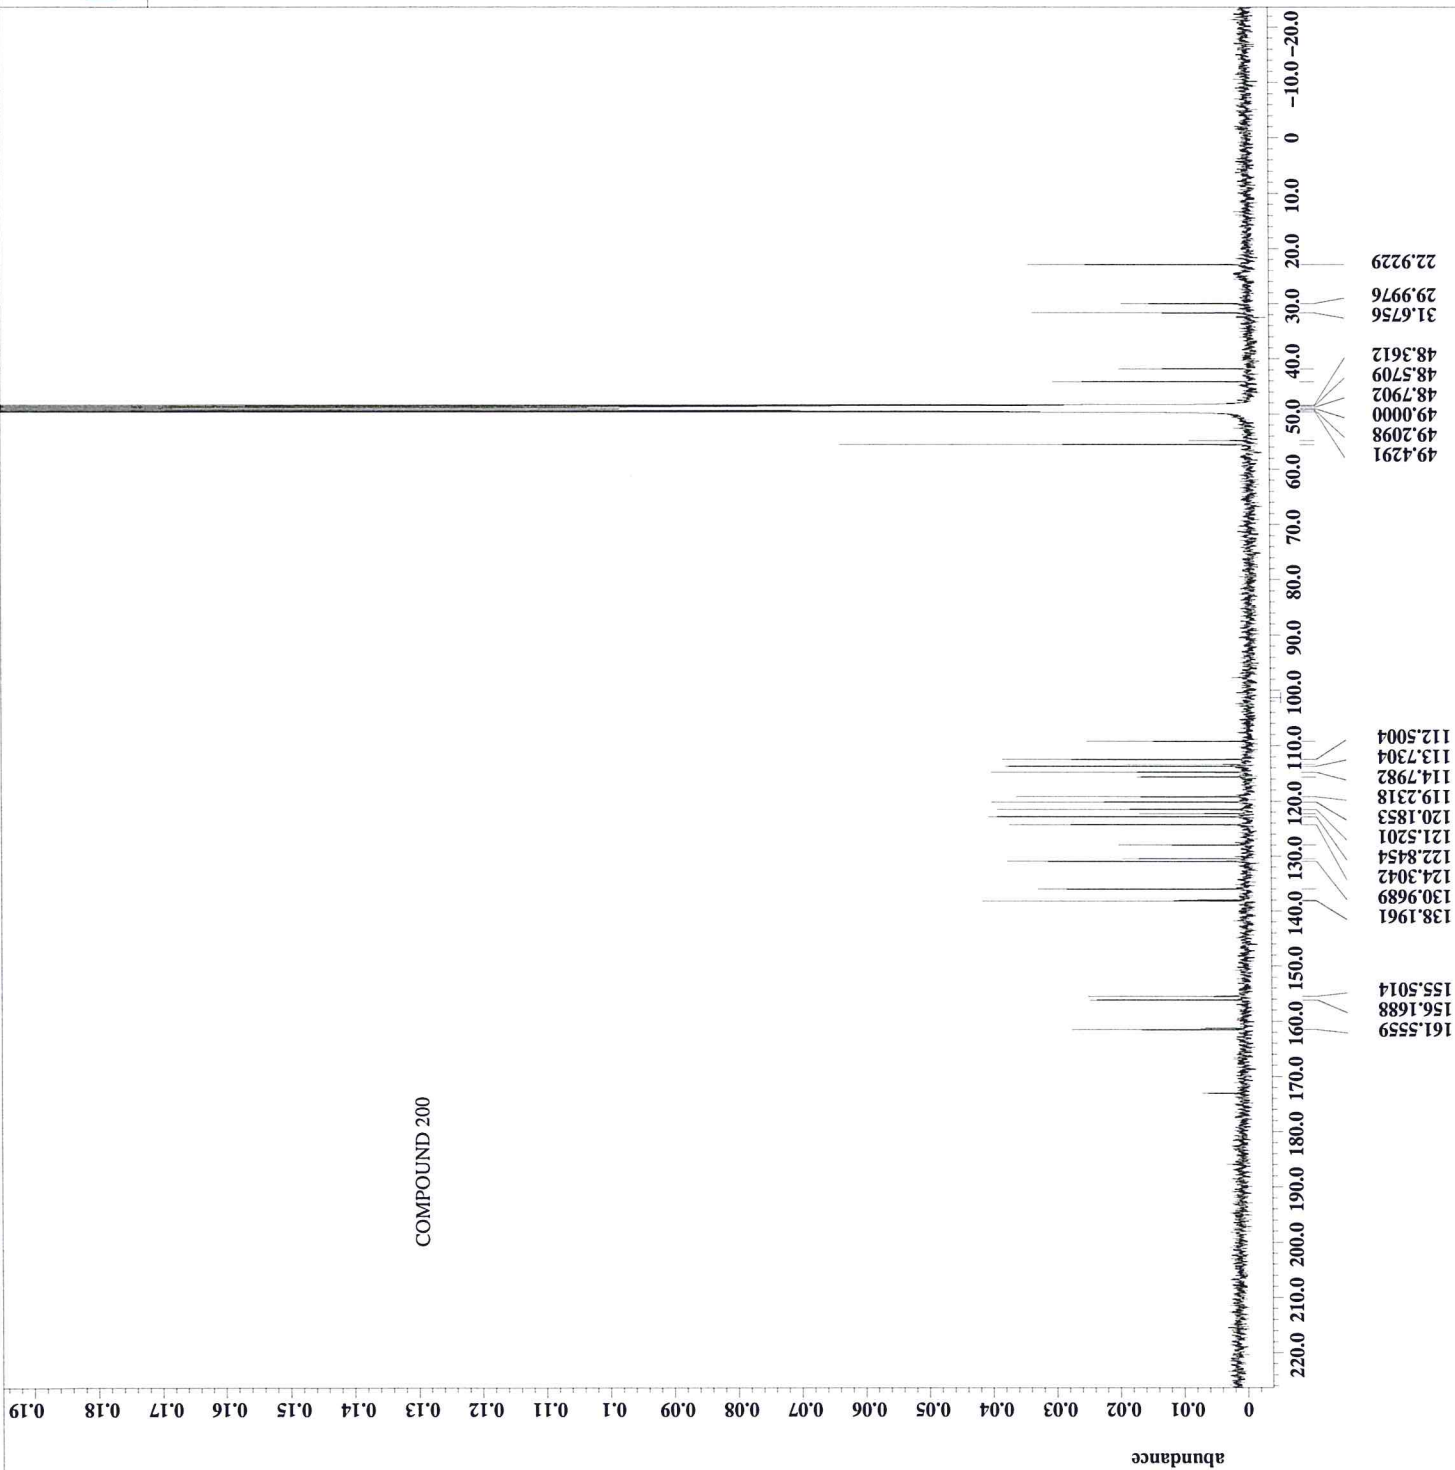

X : parts per Million : 13C

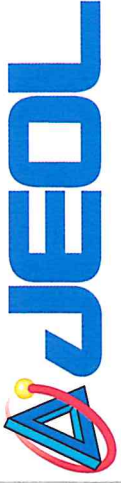

Filename = RF-I-31\_METHANOL\_CARB  
Author = Delta  
Experiment = single\_pulse\_dec  
Sample\_id = RF-I-31\_METHANOL  
Solvent = METHANOL-D3  
Creation\_time = 15-JUN-2019 06:56:42  
Revision\_time = 17-MAR-2021 11:37:24  
Current\_time = 17-MAR-2021 11:37:28

Data\_format = 1D COMPLEX  
Dim\_size = 26214  
Dim\_title = 13C  
Dim\_units = [ppm]  
Dimensions = X  
Site = ECS 400  
Spectrometer = JNM-ECS400

Field\_strength = 9.389766[T] (400 [MHz])  
X\_acq\_duration = 1.04333312[s]  
X\_domain = 13C  
X\_freq = 100.52530333 [MHz]  
X\_offset = 100 [ppm]  
X\_points = 32768  
X\_prescans = 4  
X\_resolution = 0.95846665 [Hz]  
X\_sweep = 31.40703518 [kHz]  
Irr\_domain = 1H  
Irr\_freq = 399.78219838 [MHz]  
Irr\_offset = FALSE  
Clipped = FALSE  
Mod\_return = 1  
Scans = 14540  
Total\_scans = 14540

X\_90\_width = 10.4 [us]  
X\_acq\_time = 1.04333312 [s]  
X\_angle = 30 [deg]  
X\_atn = 9 [dB]  
X\_pulse = 3.46666667 [us]  
Irr\_atn\_dec = 24.2 [dB]  
Irr\_atn\_noe = 24.2 [dB]  
Irr\_noise = WALTZ  
Decoupling = TRUE  
Initial\_wait = 1 [s]  
Noe = TRUE  
Noe\_time = 3 [s]  
Recvr\_gain = 56  
Relaxation\_delay = 3 [s]  
Repetition\_time = 4.04333312 [s]  
Temp\_get = 20 [dC]

COMPOUND 201

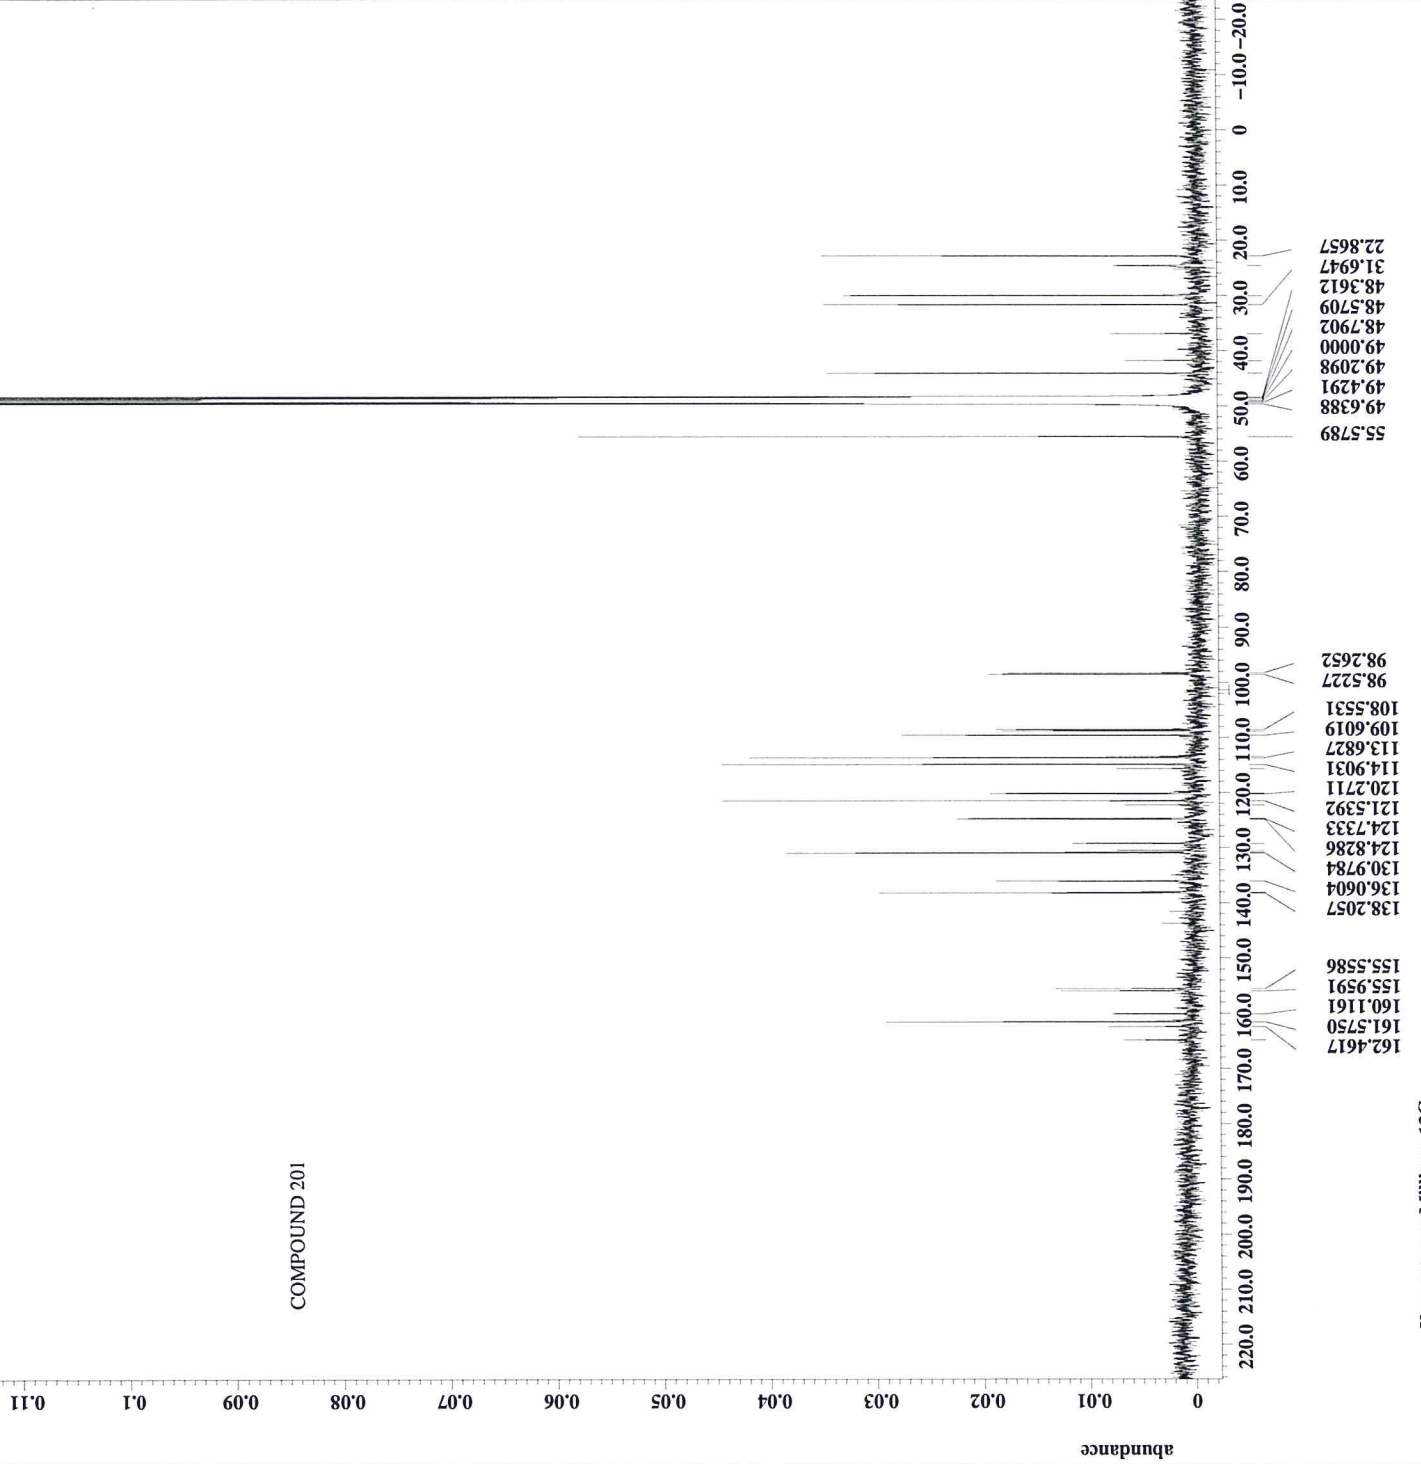

X : parts per Million : 13C



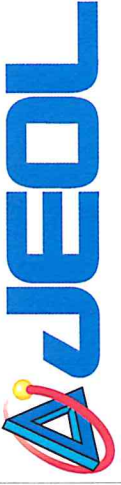

Filename = RF-I-31\_METHANOL\_II\_P  
Author = Delta  
Experiment = single\_pulse.ex2  
Sample\_id = RF-I-31\_METHANOL\_II  
Solvent = METHANOL-D3  
Creation\_time = 17-JUN-2019 11:57:29  
Revision\_time = 17-MAR-2021 11:42:58  
Current\_time = 17-MAR-2021 11:43:02  
Data\_format = 1D COMPLEX  
Dim\_size = 13107  
Dim\_title = 1H  
Dim\_units = [ppm]  
Dimensions = X  
Site = ECS 400  
Spectrometer = JNM-ECS400  
Field\_strength = 9.389766[T] (400 [MHz])  
X\_acq\_duration = 2.18365952[s]  
X\_domain = 1H  
X\_freq = 399.78219838 [MHz]  
X\_offset = 5 [ppm]  
X\_points = 16384  
X\_prescans = 1  
X\_resolution = 0.45794685 [Hz]  
X\_sweep = 7.5030012 [kHz]  
Irr\_domain = 1H  
Irr\_freq = 399.78219838 [MHz]  
Irr\_offset = 5 [ppm]  
Tri\_domain = 1H  
Tri\_freq = 399.78219838 [MHz]  
Tri\_offset = 5 [ppm]  
Clipped = FALSE  
Mod\_return = 1  
Scans = 8  
Total\_scans = 8  
X\_90\_width = 11.3665 [us]  
X\_acq\_time = 2.18365952 [s]  
X\_angle = 45 [deg]  
X\_atn = 6 [dB]  
X\_pulse = 5.6825 [us]  
Irr\_mode = Off  
Tri\_mode = Off  
Dante\_presat = FALSE  
Initial\_wait = 1 [s]  
Recvr\_gain = 50  
Relaxation\_delay = 4 [s]  
Repetition\_time = 6.18365952 [s]  
Temp\_get = 19.7 [DC]

31.95

23.48

COMPOUND 201

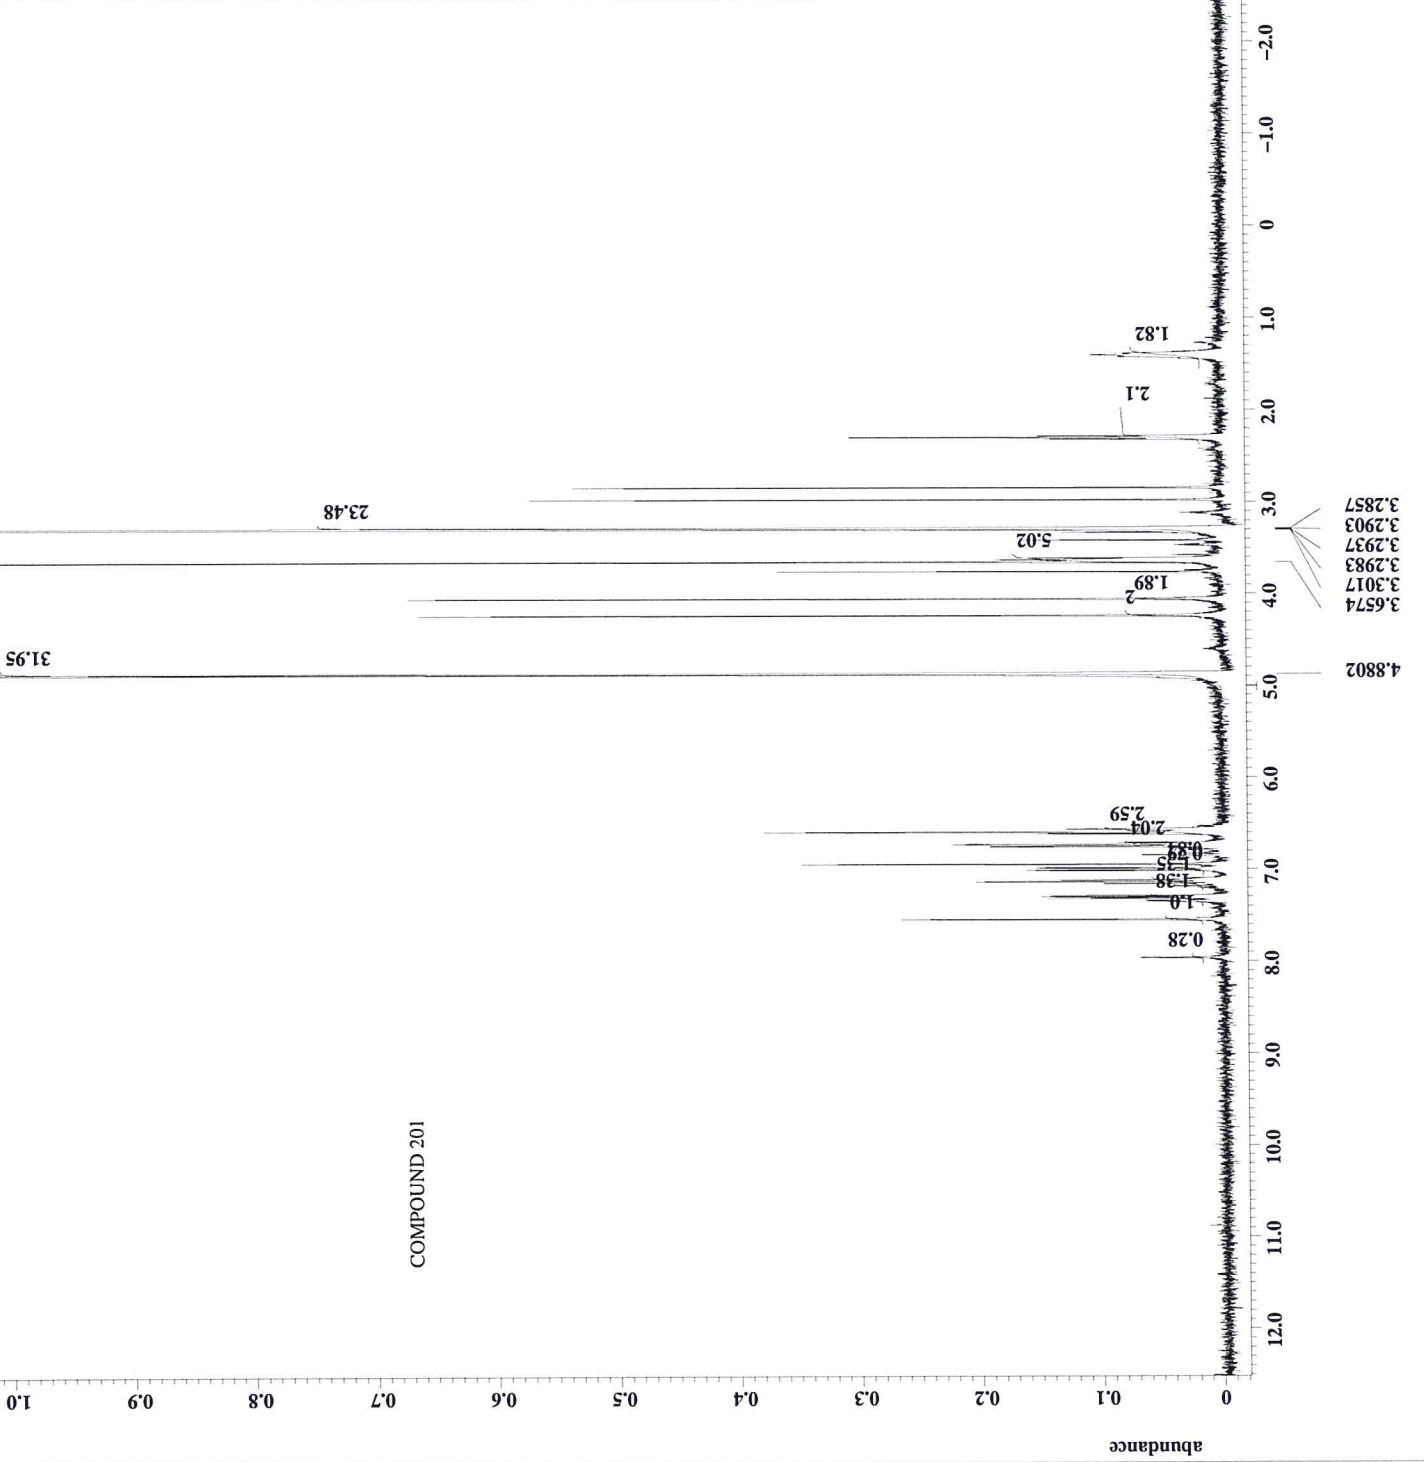

X : parts per Million : 1H

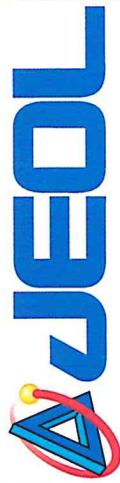

Filename = SK-I-23\_PROTON-7.jdf  
Author = Delta  
Experiment = single\_pulse.ex2  
Sample\_id = SK-I-23  
Solvent = METHANOL-D3  
Creation\_time = 15-MAR-2017 10:04:47  
Revision\_time = 11-MAR-2021 14:59:05  
Current\_time = 11-MAR-2021 14:59:13  
Data\_format = 1D COMPLEX  
Dim\_size = 13107  
Dim\_title = 1H  
Dim\_units = [ppm]  
Dimensions = X  
Site = ECS 400  
Spectrometer = JNM-ECS400  
Field\_strength = 9.389766[T] (400[MHz])  
X\_acq\_duration = 2.18365952[s]  
X\_domain = 1H  
X\_freq = 399.78219838[MHz]  
X\_offset = 5[ppm]  
X\_points = 16384  
X\_prescans = 1  
X\_resolution = 0.45794685[Hz]  
X\_sweep = 7.5030012[kHz]  
Irr\_domain = 1H  
Irr\_freq = 399.78219838[MHz]  
Irr\_offset = 5[ppm]  
Tri\_domain = 1H  
Tri\_freq = 399.78219838[MHz]  
Tri\_offset = 5[ppm]  
Clipped = FALSE  
Mod\_return = 1  
Scans = 16  
Total\_scans = 16  
X\_90\_width = 10.68[us]  
X\_acq\_time = 2.18365952[s]  
X\_angle = 45[deg]  
X\_atn = 6[db]  
X\_pulse = 5.54[us]  
Irr\_mode = Off  
Tri\_mode = Off  
Dante\_presat = FALSE  
Initial\_wait = 1[s]  
Recvr\_gain = 46  
Relaxation\_delay = 4[fs]  
Repetition\_time = 6.18365952[s]  
Temp\_get = 460.0[dc]

COMPOUND 202

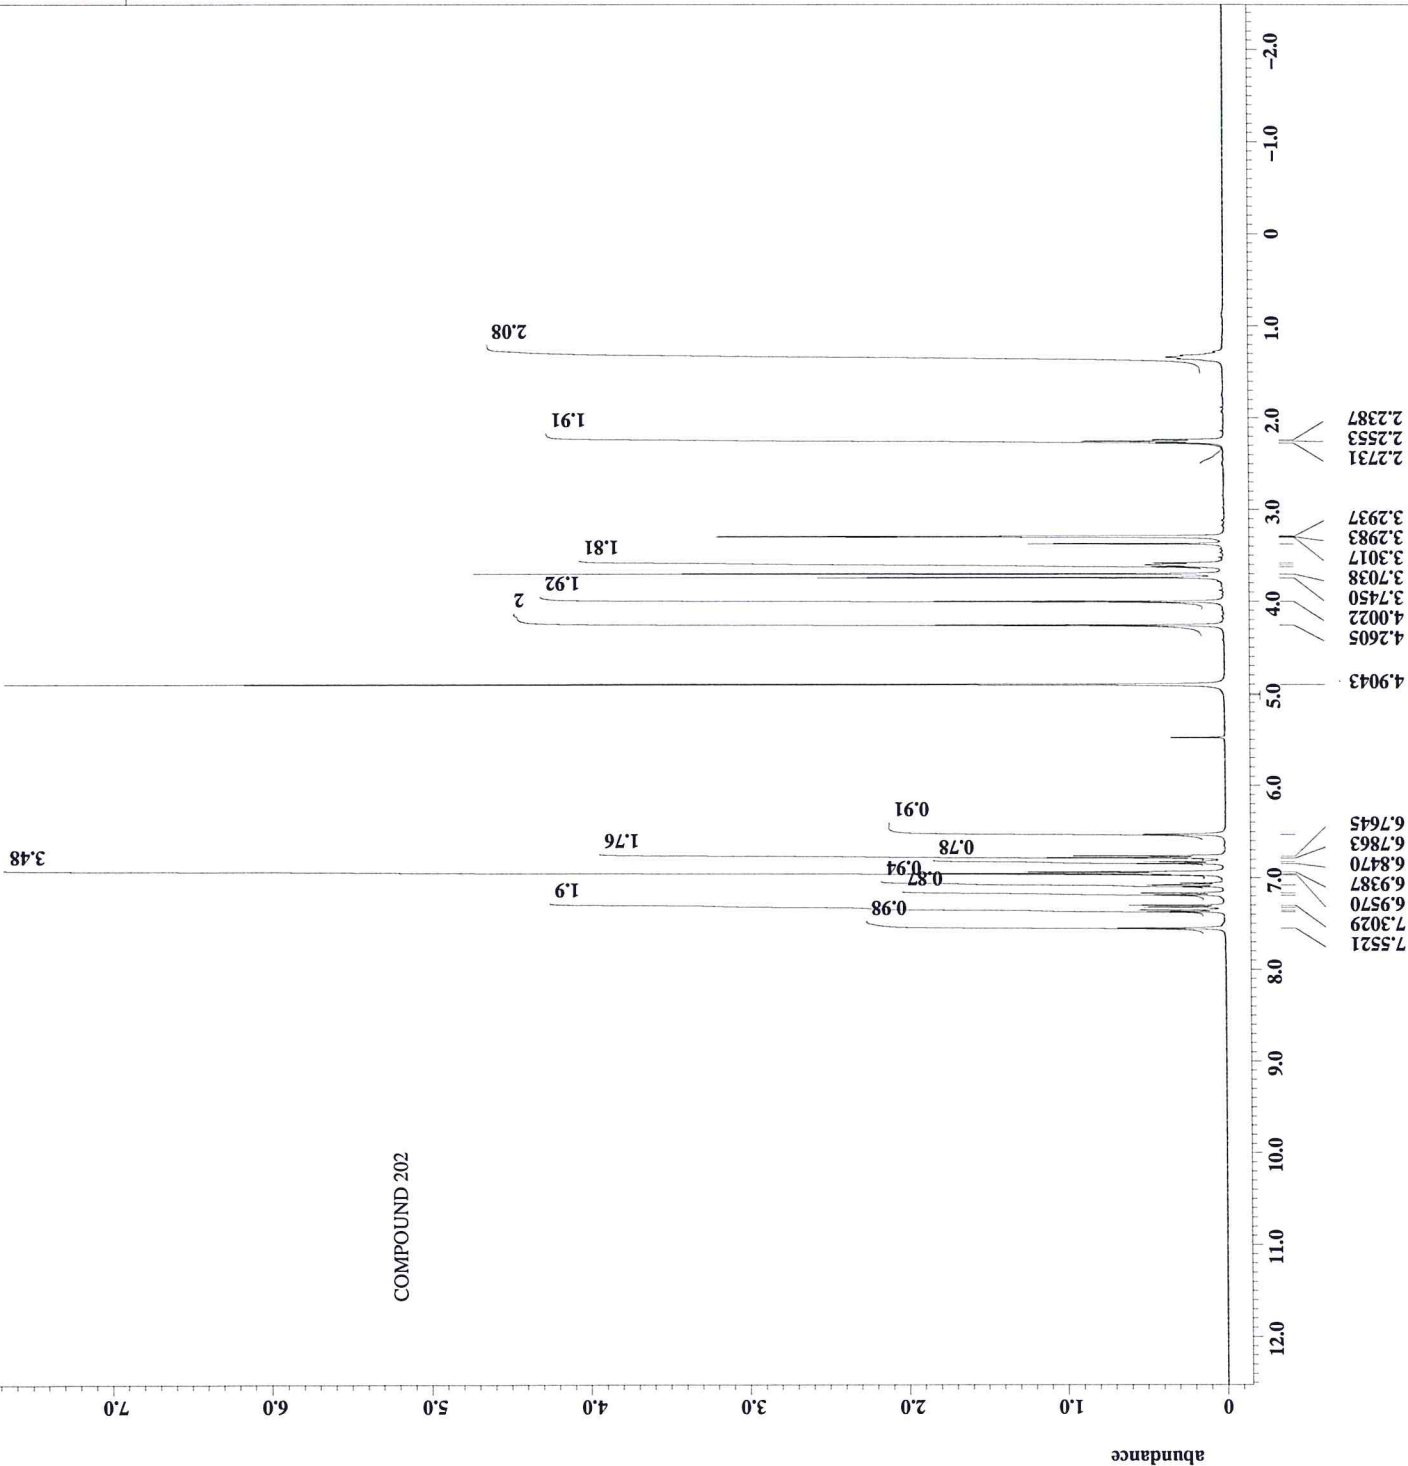

X : parts per Million : 1H

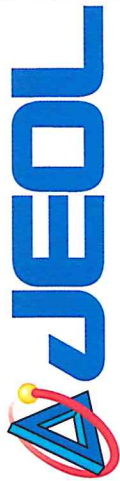

File name = SK-I-23\_CARBON-8.jdf  
Author = Delta  
Experiment = single\_pulse\_dec  
Sample\_id = SK-I-23  
Solvent = METHANOL-D3  
Creation time = 15-MAR-2017 13:36:20  
Revision time = 11-MAR-2021 15:01:36  
Current time = 11-MAR-2021 15:01:42

Data\_format = 1D COMPLEX  
Dim\_size = 26214  
Dim\_title = 13C  
Dim\_units = [ppm]  
Dimensions = X  
Site = ECS 400  
Spectrometer = JNM-ECS400

Field\_strength = 9.389766[T] (400 [MHz])  
X\_acq\_duration = 1.04333312[s]  
X\_domain = 13C  
X\_freq = 100.52530333 [MHz]  
X\_offset = 100 [ppm]  
X\_points = 32768  
X\_prescans = 4  
X\_resolution = 0.95846665 [Hz]  
X\_sweep = 31.40703518 [kHz]  
Irr\_domain = 1H  
Irr\_freq = 399.78219838 [MHz]  
Irr\_offset = 5 [ppm]  
Clipped = TRUE  
Mod\_return = 1  
Scans = 2048  
Total\_scans = 2048

X\_90\_width = 12.84 [us]  
X\_acq\_time = 1.04333312 [s]  
X\_angle = 30 [deg]  
X\_atn = 9 [dB]  
X\_pulse = 4.28 [us]  
Irr\_atn\_dec = 27 [dB]  
Irr\_atn\_noe = 27 [dB]  
Irr\_noise = WALTZ  
Decoupling = TRUE  
Initial\_wait = 1 [s]  
Noe = TRUE  
Noe\_time = 2 [s]  
Recvr\_gain = 60  
Relaxation\_delay = 2 [s]  
Repetition\_time = 3.04333312 [s]  
Temp\_get = 460.0 [dC]

COMPOUND 202

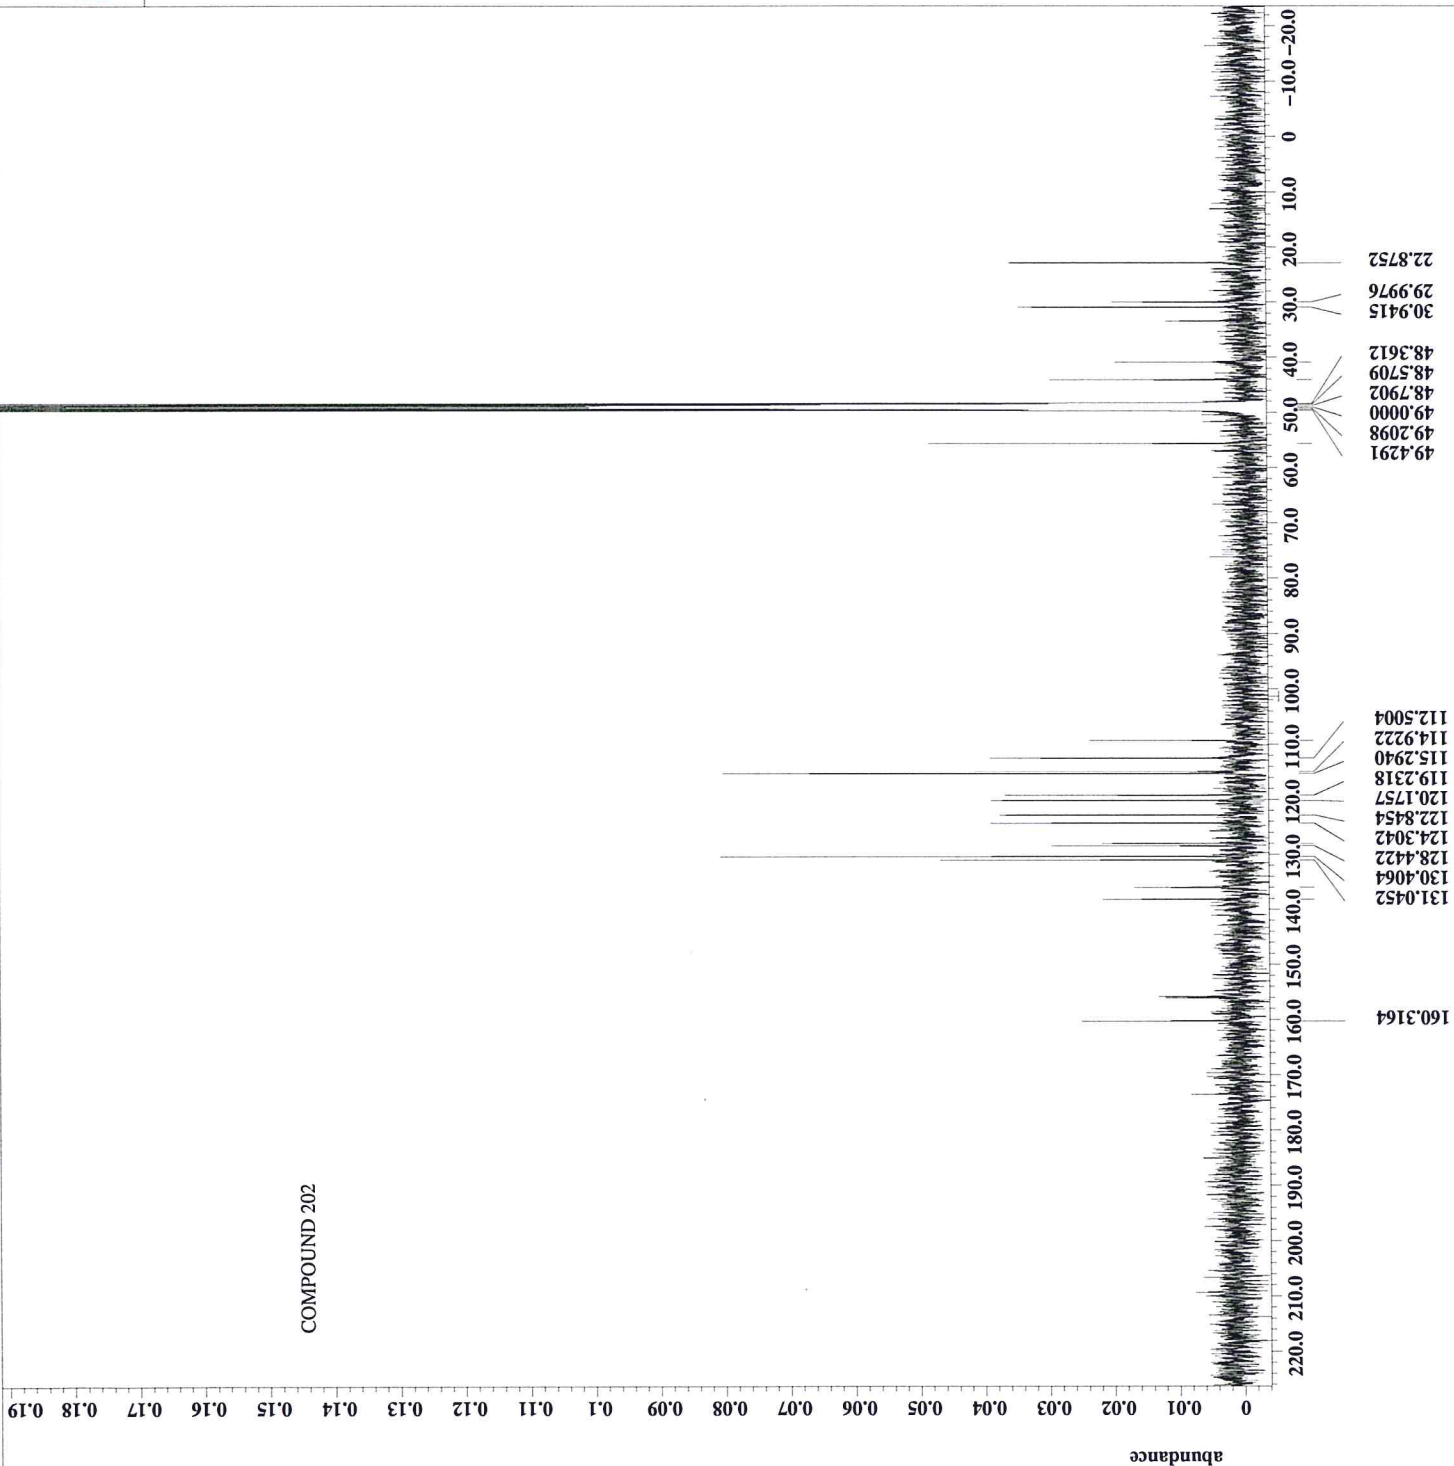

X : parts per Million : 13C

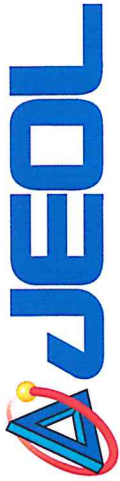

Filename = SK-I-105\_PROTON-5-jdf  
Author = Delta  
Experiment = single\_pulse.ex2  
Sample\_id = SK-I-105  
Solvent = DMSO-D6  
Creation\_time = 23-OCT-2017 09:14:44  
Revision\_time = 12-MAR-2021 11:42:48  
Current\_time = 12-MAR-2021 11:42:52

Data\_format = 1D COMPLEX  
Dim\_size = 13107  
Dim\_title = 1H  
Dim\_units = [ppm]  
Dimensions = X  
Site = EGS 400  
Spectrometer = JNM-ECS400

Field\_strength = 9.389766[T] (400 [MHz])  
X\_acq\_duration = 2.18365952[s]  
X\_domain = 1H  
X\_freq = 399.78219838 [MHz]  
X\_offset = 5 [ppm]  
X\_points = 16384  
X\_prescans = 1  
X\_resolution = 0.45794685 [Hz]  
X\_sweep = 7.5030012 [kHz]  
Irr\_domain = 1H  
Irr\_freq = 399.78219838 [MHz]  
Irr\_offset = 5 [ppm]  
Tri\_domain = 1H  
Tri\_freq = 399.78219838 [MHz]  
Tri\_offset = 5 [ppm]  
Clipped = FALSE  
Mod\_return = 1  
Scans = 16  
total\_scans = 16

X\_90\_width = 10.65 [us]  
X\_acq\_time = 2.18365952 [s]  
X\_angle = 45 [deg]  
X\_atn = 6 [dB]  
X\_pulse = 5.325 [us]  
Irr\_mode = Off  
Tri\_mode = Off  
Dante\_presat = FALSE  
Initial\_wait = 1 [s]  
Recvr\_gain = 40  
Relaxation\_delay = 4 [s]  
Repetition\_time = 6.18365952 [s]  
temp\_get = 19.81 [dC]

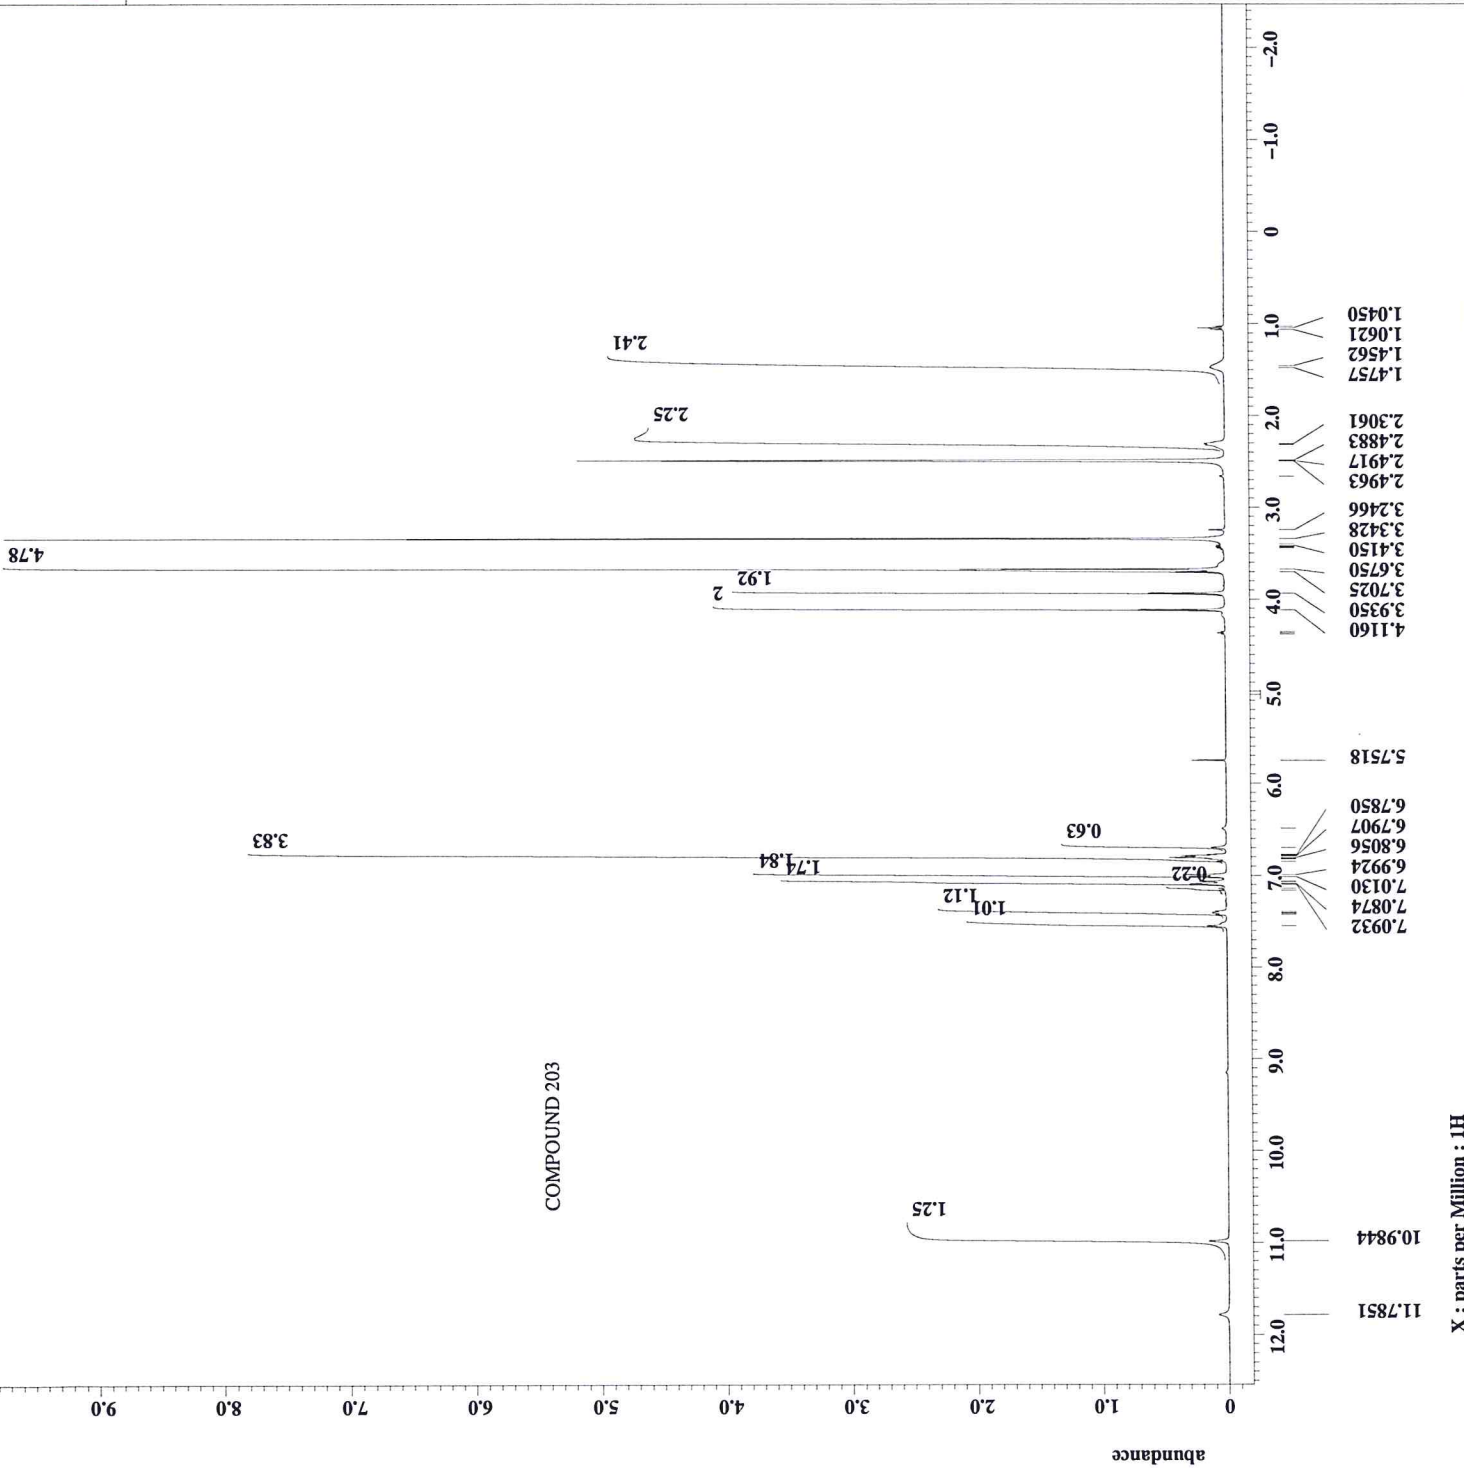

X : parts per Million : 1H



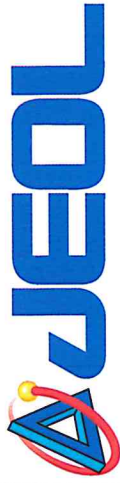

Filename = SK-I-105\_CARBON-5.jdf  
Author = Delta  
Experiment = single\_pulse\_dec  
Sample\_id = SK-I-105  
Solvent = DMSO-D6  
Creation\_time = 30-OCT-2017 06:23:23  
Revision\_time = 12-MAR-2021 11:45:52  
Current\_time = 12-MAR-2021 11:45:57  
Data\_format = 1D COMPLEX  
Dim\_size = 26214  
Dim\_title = 13C  
Dim\_units = [ppm]  
Dimensions = X  
Site = ECS 400  
Spectrometer = JNM-ECS400  
Field\_strength = 9.389766[T] (400 [MHz])  
X\_acq\_duration = 1.04333312[s]  
X\_domain = 13C  
X\_freq = 100.52530333 [MHz]  
X\_offset = 100 [ppm]  
X\_points = 32768  
X\_prescans = 4  
X\_resolution = 0.95846665 [Hz]  
X\_sweep = 31.40703518 [kHz]  
Irr\_domain = 1H  
Irr\_freq = 399.78219838 [MHz]  
Irr\_offset = 5 [ppm]  
Clipped = TRUE  
Mod\_return = 1  
Scans = 74299  
Total\_scans = 74299  
X\_90\_width = 13.22 [us]  
X\_acq\_time = 1.04333312 [s]  
X\_angle = 30 [deg]  
X\_atn = 9 [dB]  
X\_pulse = 4.40666667 [us]  
Irr\_atn\_dec = 27 [dB]  
Irr\_atn\_noe = 27 [dB]  
Irr\_noise = WALTZ  
Decoupling = TRUE  
Initial\_wait = 1 [s]  
Noe = TRUE  
Noe\_time = 2 [s]  
Recvr\_gain = 60  
Relaxation\_delay = 2 [s]  
Repetition\_time = 3.04333312 [s]  
Temp\_get = 20.4 [dC]

COMPOUND 203

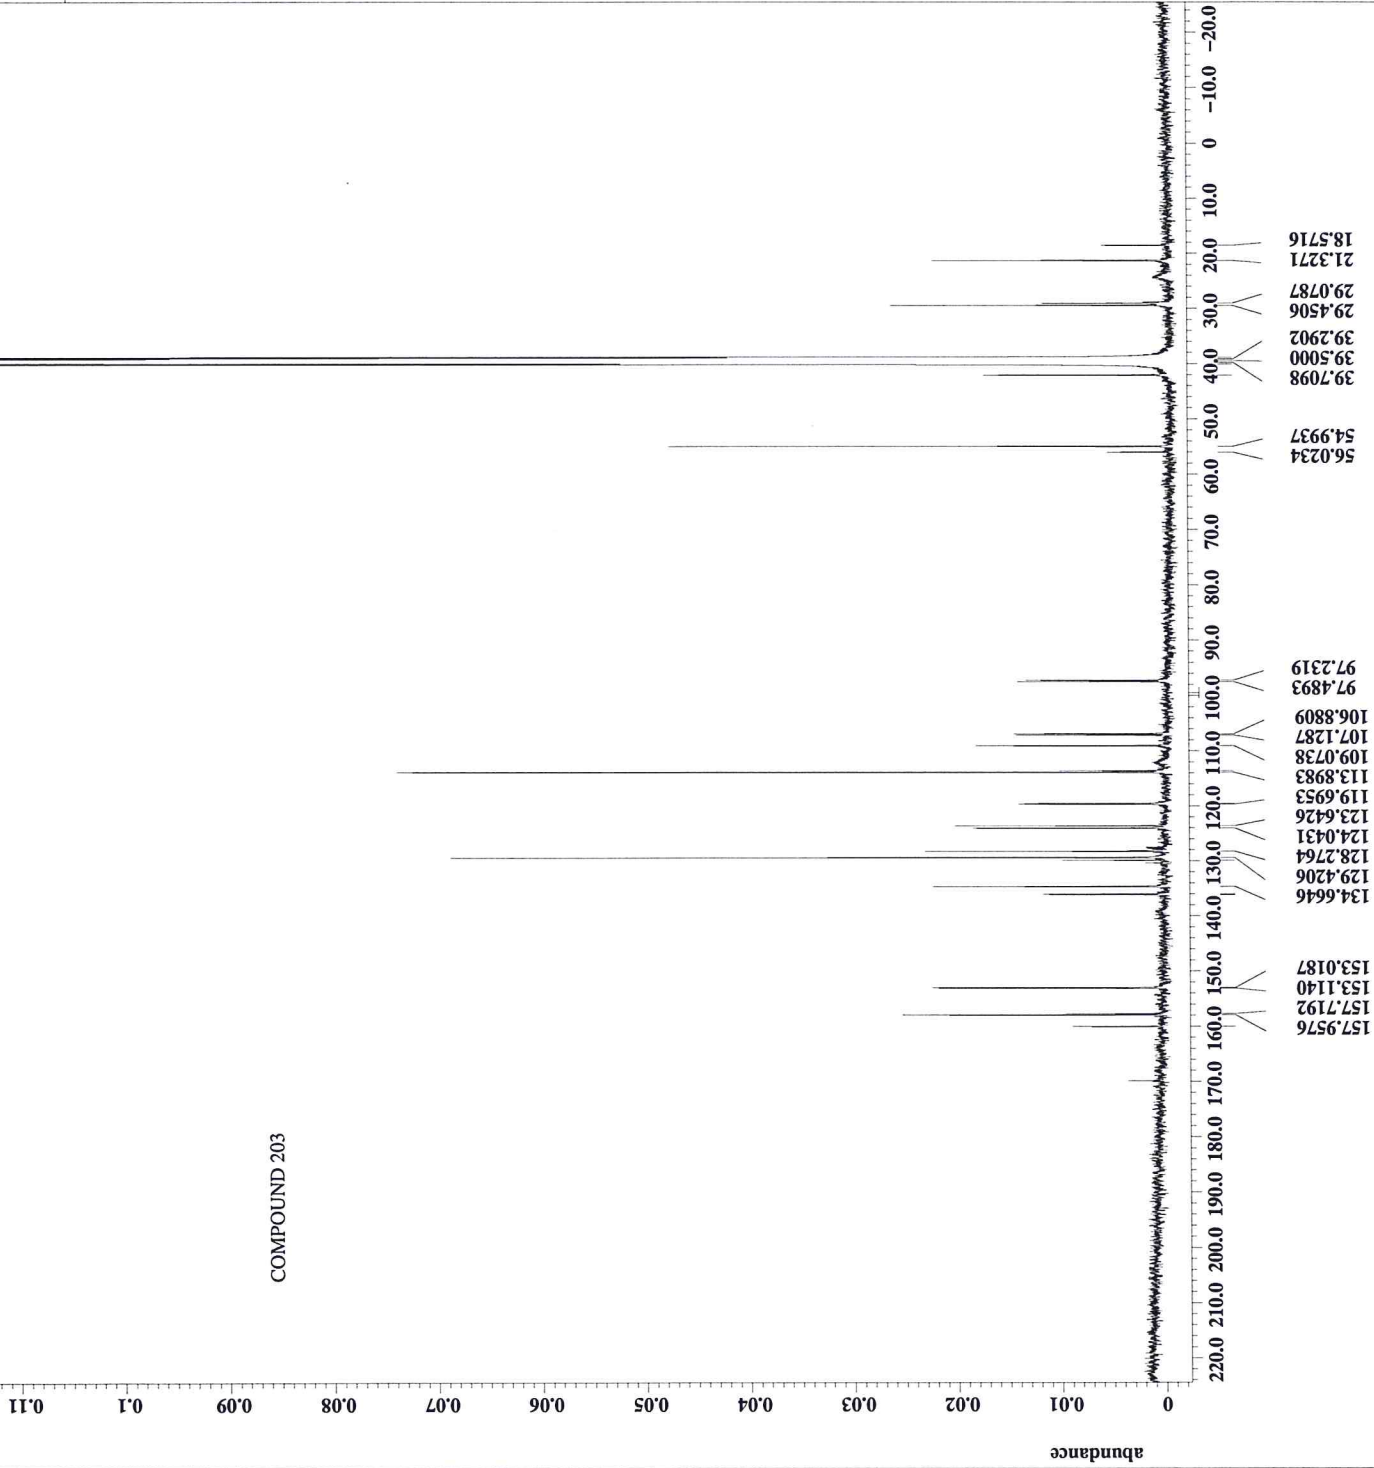

X : parts per Million : 13C

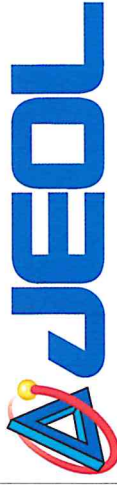

```

= SK-I-56_PROTON-5.jdf
= Delta
= single_pulse.ex2
= SK-I-56
= METHANOL-D3
= 6-JUN-2017 11:59:34
= 12-MAR-2021 11:08:41
= 12-MAR-2021 11:08:45
= 1D COMPLEX
= 13107
= 1H
= [ppm]
= X
= ECS 400
= JNM-ECS400
= 9.389766[T] (400 [MHZ]
= 2.18365952[s]
= 1H
= 399.78219838 [MHZ]
= 5 [ppm]
= 16384
= 1
= 0.45794685 [Hz]
= 7.5030012 [kHz]
= 1H
= 399.78219838 [MHZ]
= 5 [ppm]
= 1H
= 399.78219838 [MHZ]
= 5 [ppm]
= FALSE
= 1
= 16
= 10.68 [us]
= 2.18365952 [s]
= 45 [deg]
= 6 [dB]
= 5.34 [us]
= Off
= Off
= FALSE
= 1 [s]
= 44
= 4 [s]
= 6.18365952 [s]
= 460.0 [dC]
  
```

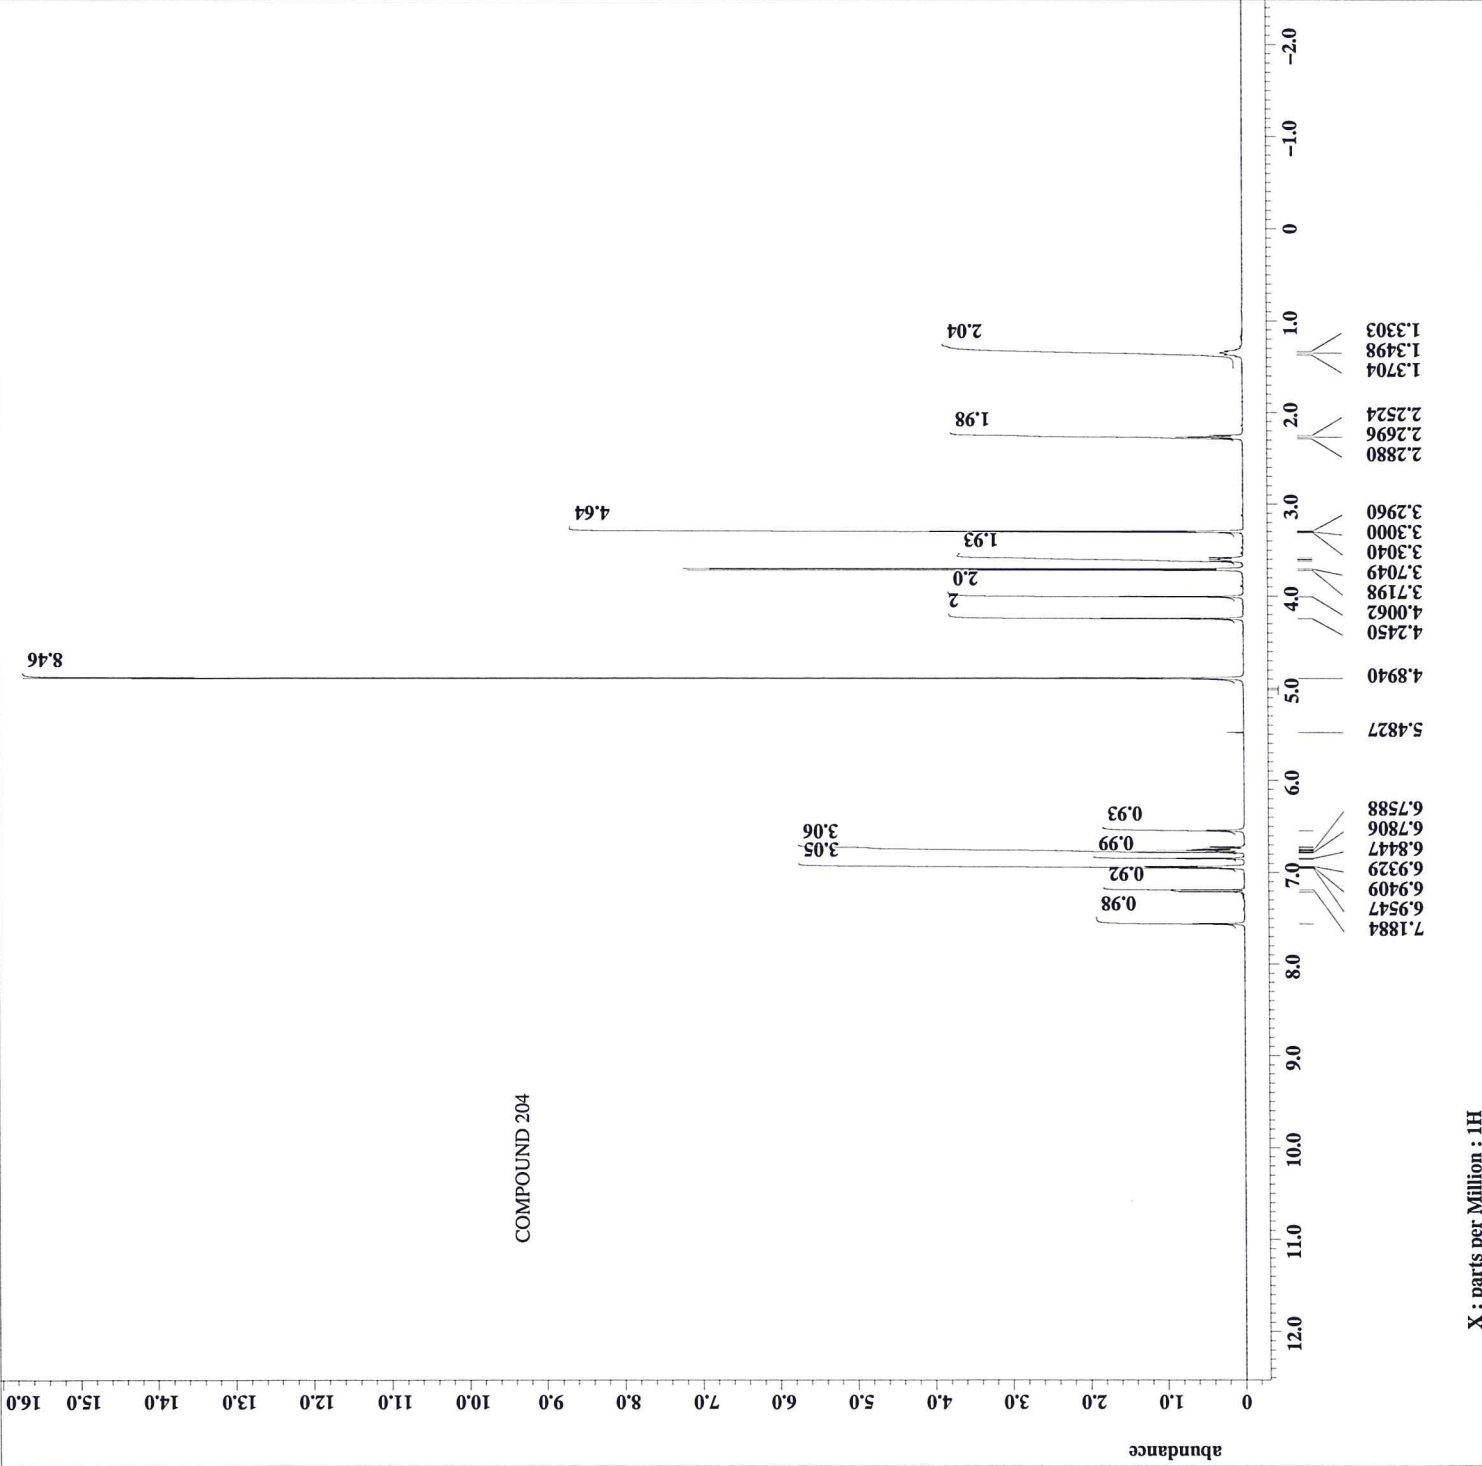

X : parts per Million : 1H

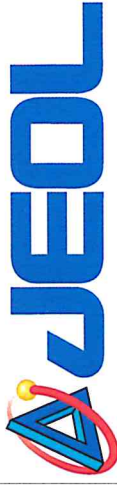

File name = SK-I-56\_CARBON-5.jdf  
Author = Delta  
Experiment = single\_pulse\_dec  
Sample\_id = SK-I-56  
Solvent = METHANOL-D3  
Creation time = 7-JUN-2017 07:53:15  
Revision time = 12-MAR-2021 11:11:11  
Current time = 12-MAR-2021 11:11:16

Data format = 1D COMPLEX  
Dim\_size = 26214  
Dim\_title = 13C  
Dim\_units = [ppm]  
Dimensions = X  
Site = ECS 400  
Spectrometer = JNM-ECS400

Field strength = 9.389766 [T] (400 [MHz])  
X\_acq\_duration = 1.04333312 [s]  
X\_domain = 13C  
X\_freq = 100.52530333 [MHz]  
X\_offset = 100 [ppm]  
X\_points = 32768  
X\_prescans = 4  
X\_resolution = 0.95846665 [Hz]  
X\_sweep = 31.40703518 [kHz]  
Irr\_domain = 1H  
Irr\_freq = 399.78219838 [MHz]  
Irr\_offset = 5 [ppm]  
Clipped = FALSE  
Mod\_return = 1  
Scans = 18500  
Total\_scans = 18500

X\_90\_width = 12.84 [us]  
X\_acq\_time = 1.04333312 [s]  
X\_angle = 30 [deg]  
X\_atn = 9 [dB]  
X\_pulse = 4.28 [us]  
Irr\_atn\_dec = 27 [dB]  
Irr\_atn\_noe = 27 [dB]  
Irr\_noise = WALTZ  
Decoupling = TRUE  
Initial\_wait = 1 [s]  
Noe = TRUE  
Noe\_time = 2 [s]  
Recvr\_gain = 60  
Relaxation\_delay = 2 [s]  
Repetition\_time = 3.04333312 [s]  
Temp\_get = 460.0 [dC]

COMPOUND 204

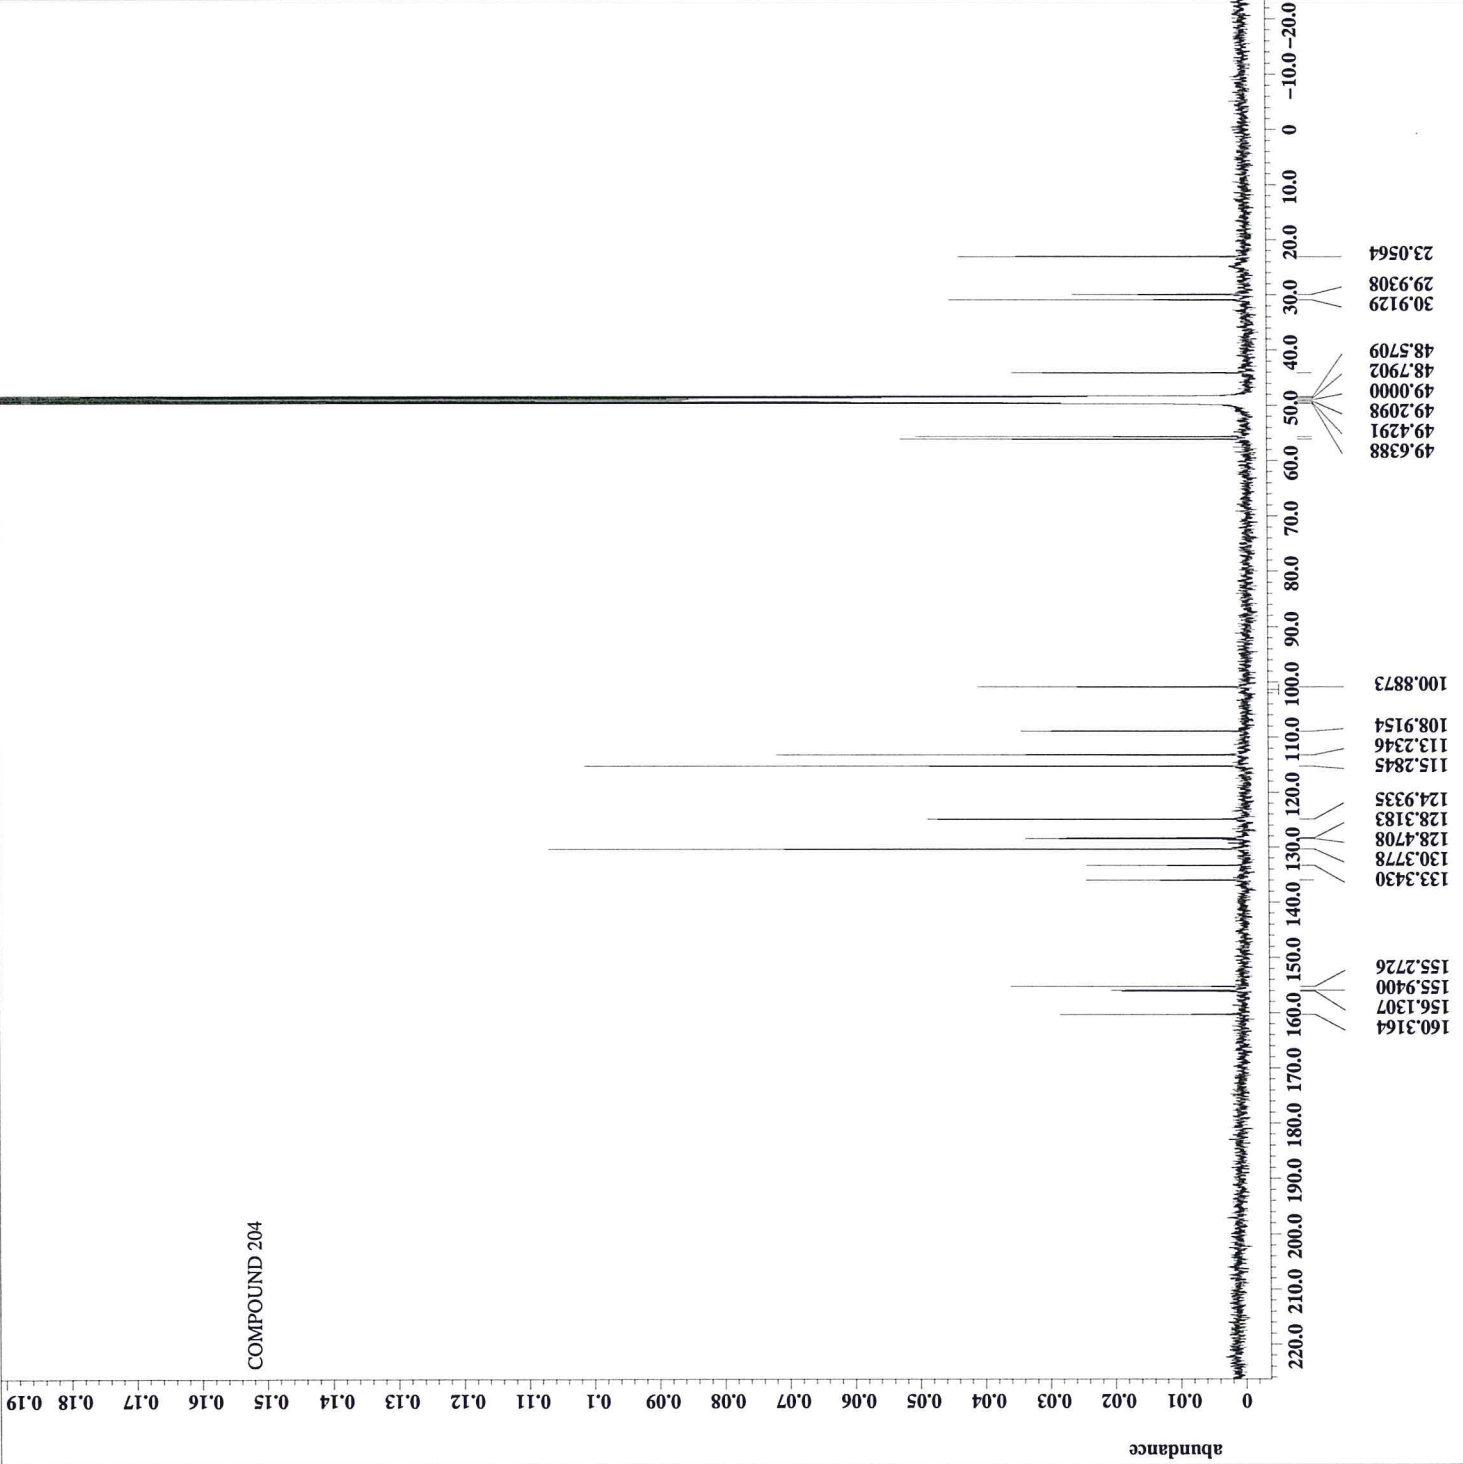

X : parts per Million : 13C

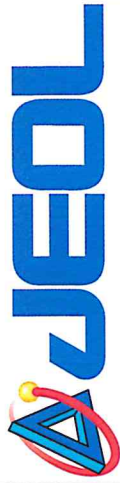

Filename = KS-I-59-C1\_PROTON-6.j  
 Author = Delta  
 Experiment = single\_pulse.ex2  
 Sample\_id = KS-I-59-C1  
 Solvent = DMSO-D6  
 Creation\_time = 2-AUG-2019 14:02:28  
 Revision\_time = 11-MAR-2021 14:13:10  
 Current\_time = 11-MAR-2021 14:13:14

Data\_format = 1D COMPLEX  
 Dim\_size = 13107  
 Dim\_title = 1H  
 Dim\_units = [ppm]  
 Dimensions = X  
 Site = ECS 400  
 Spectrometer = JNM-ECS400

Field\_strength = 9.389766[T] (400 [MHz])  
 X\_acq\_duration = 2.18365952[s]  
 X\_domain = 1H  
 X\_freq = 399.78219838 [MHz]  
 X\_offset = 5 [ppm]  
 X\_points = 16384  
 X\_prescans = 1  
 X\_resolution = 0.45794685 [Hz]  
 X\_sweep = 7.5030012 [kHz]

Irr\_domain = 1H  
 Irr\_freq = 399.78219838 [MHz]  
 Irr\_offset = 5 [ppm]  
 Tri\_domain = 1H  
 Tri\_freq = 399.78219838 [MHz]  
 Tri\_offset = 5 [ppm]  
 Clipped = FALSE  
 Mod\_return = 1  
 Scans = 4  
 Total\_scans = 4

X\_90\_width = 11.365 [us]  
 X\_acq\_time = 2.18365952 [s]  
 X\_angle = 45 [deg]  
 X\_atn = 6 [dB]  
 X\_pulse = 5.6825 [us]  
 Irr\_mode = Off  
 Tri\_mode = Off  
 Dante\_presat = FALSE  
 Initial\_wait = 1 [s]  
 Recvr\_gain = 44  
 Relaxation\_delay = 4 [s]  
 Repetition\_time = 6.18365952 [s]  
 Temp\_get = 20.2 [degC]

COMPOUND 205

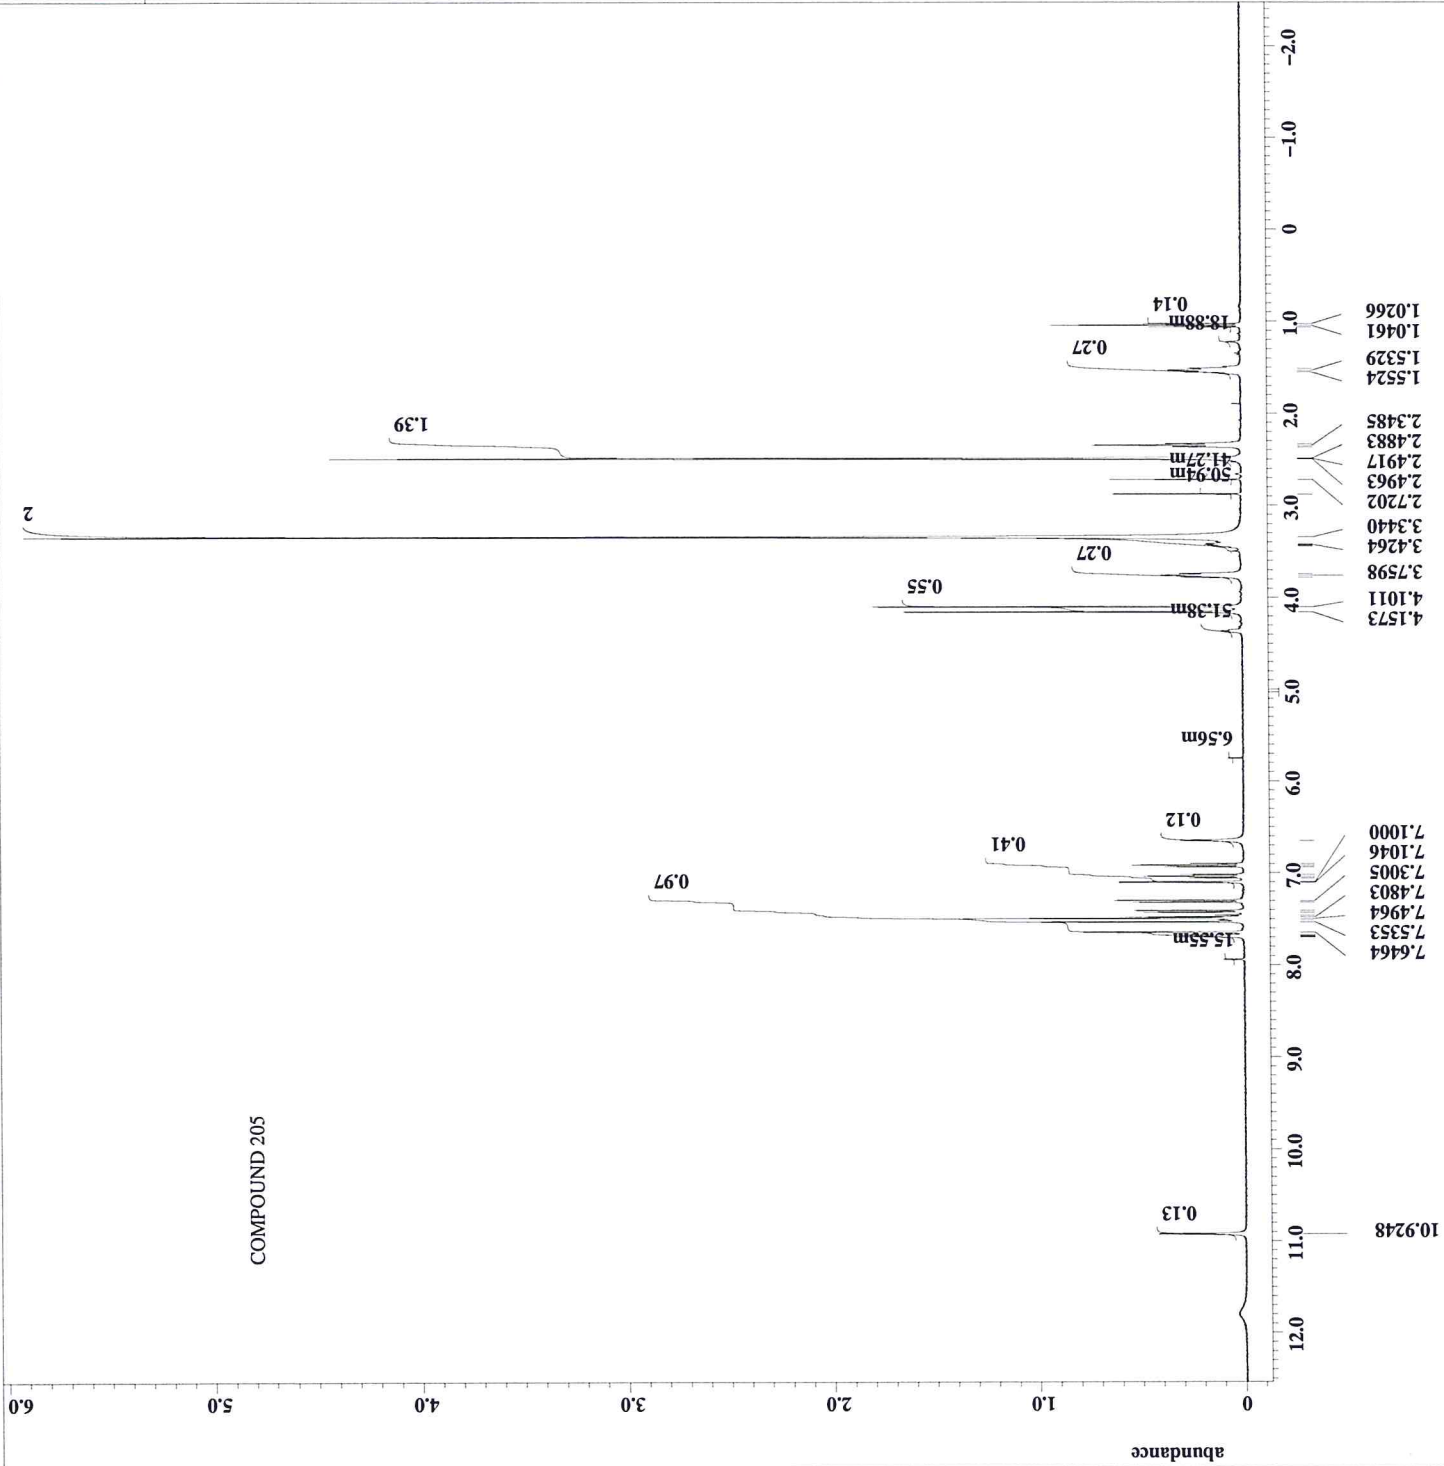

X : parts per Million : 1H



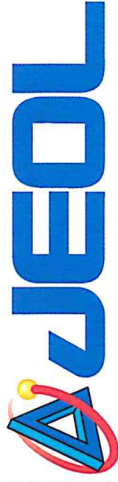

File: KS-I-59-C1\_CARBON-5.j  
Author: Delta  
Experiment: single\_pulse\_dec  
Sample\_id: KS-I-59-C1  
Solvent: DMSO-D6  
Creation\_time: 4-AUG-2019 20:10:04  
Revision\_time: 11-MAR-2021 14:15:07  
Current\_time: 11-MAR-2021 14:15:11

Data\_format: 1D COMPLEX  
Dim\_size: 26214  
Dim\_title: 13C  
Dim\_units: [ppm]  
Dimensions: X  
Site: ECS 400  
Spectrometer: JNM-ECS400

Field\_strength: 9.389766 [T] (400 [MHz])  
X\_acq\_duration: 1.04333312 [s]  
X\_domain: 13C  
X\_freq: 100.52530333 [MHz]  
X\_offset: 100 [ppm]  
X\_points: 32768  
X\_prescans: 4  
X\_resolution: 0.95846665 [Hz]  
X\_sweep: 31.40703518 [kHz]  
Irr\_domain: 1H  
Irr\_freq: 399.78219838 [MHz]  
Irr\_offset: 5 [ppm]  
Clipped: FALSE  
Mod\_return: 1  
Scans: 64000  
Total\_scans: 64000

X\_90\_width: 10.4 [us]  
X\_acq\_time: 1.04333312 [s]  
X\_angle: 30 [deg]  
X\_atn: 9 [dB]  
X\_pulse: 3.46666667 [us]  
Irr\_atn\_dec: 24.2 [dB]  
Irr\_atn\_noe: 24.2 [dB]  
Decoupling: WALTZ  
Initial\_wait: 1 [s]  
Noe: TRUE  
Noe\_time: 2 [s]  
Recvr\_gain: 58  
Relaxation\_delay: 2 [s]  
Repetition\_time: 3.04333312 [s]  
Temp\_get: 21 [dC]

COMPOUND 205

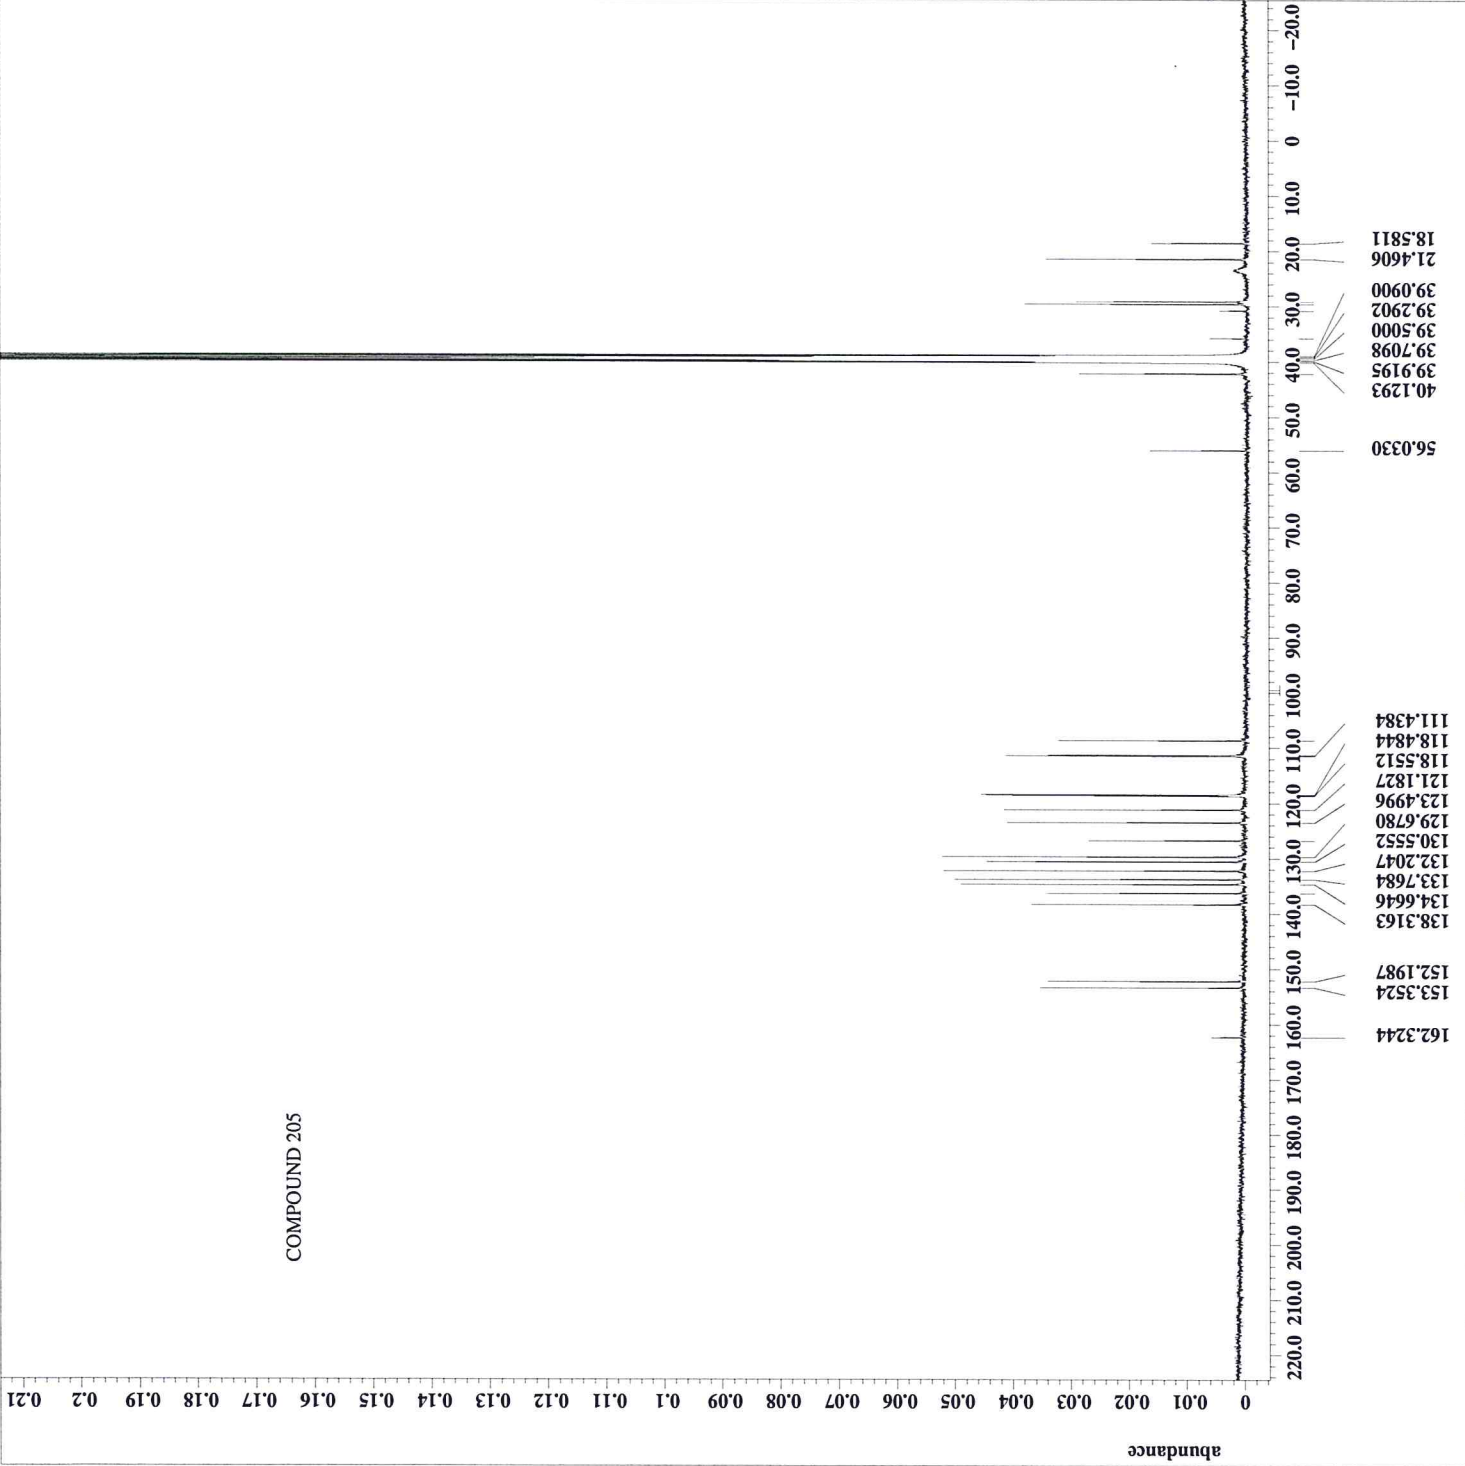

X : parts per Million : 13C

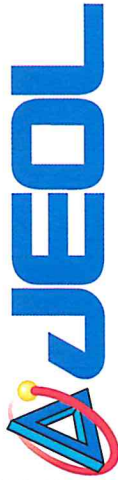

File name = KS-I-61-C\_PROTON-4.jd  
Author = Delta  
Experiment = single\_pulse.ex2  
Sample\_id = KS-I-61-C  
Solvent = DMSO-D6  
Creation time = 15-AUG-2019 14:29:28  
Revision time = 15-MAR-2021 15:39:56  
Current time = 15-MAR-2021 15:39:59

Data format = 1D COMPLEX  
Dim size = 13107  
Dim title = 1H  
Dim units = [ppm]  
Dimensions = X  
Site = ECS 400  
Spectrometer = JNM-ECS400

Field strength = 9.389766 [T] (400 [MHz])  
X\_acq\_duration = 2.18365952 [s]  
X\_domain = 1H  
X\_freq = 399.78219838 [MHz]  
X\_offset = 5 [ppm]  
X\_points = 16384  
X\_prescans = 1  
X\_resolution = 0.45794685 [Hz]  
X\_sweep = 7.5030012 [kHz]  
Irr\_domain = 1H  
Irr\_freq = 399.78219838 [MHz]  
Irr\_offset = 5 [ppm]  
Tri\_domain = 1H  
Tri\_freq = 399.78219838 [MHz]  
Tri\_offset = 5 [ppm]  
Clipped = FALSE  
Mod\_return = 1  
Scans = 4  
Total\_scans = 4

X\_90\_width = 11.365 [us]  
X\_acq\_time = 2.18365952 [s]  
X\_angle = 45 [deg]  
X\_atn = 6 [db]  
X\_pulse = 5.6825 [us]  
Irr\_mode = Off  
Tri\_mode = Off  
Dante\_presat = FALSE  
Initial\_wait = 1 [s]  
Recvr\_gain = 40  
Relaxation\_delay = 4 [s]  
Repetition\_time = 6.18365952 [s]  
Temp\_get = 19.5 [degC]

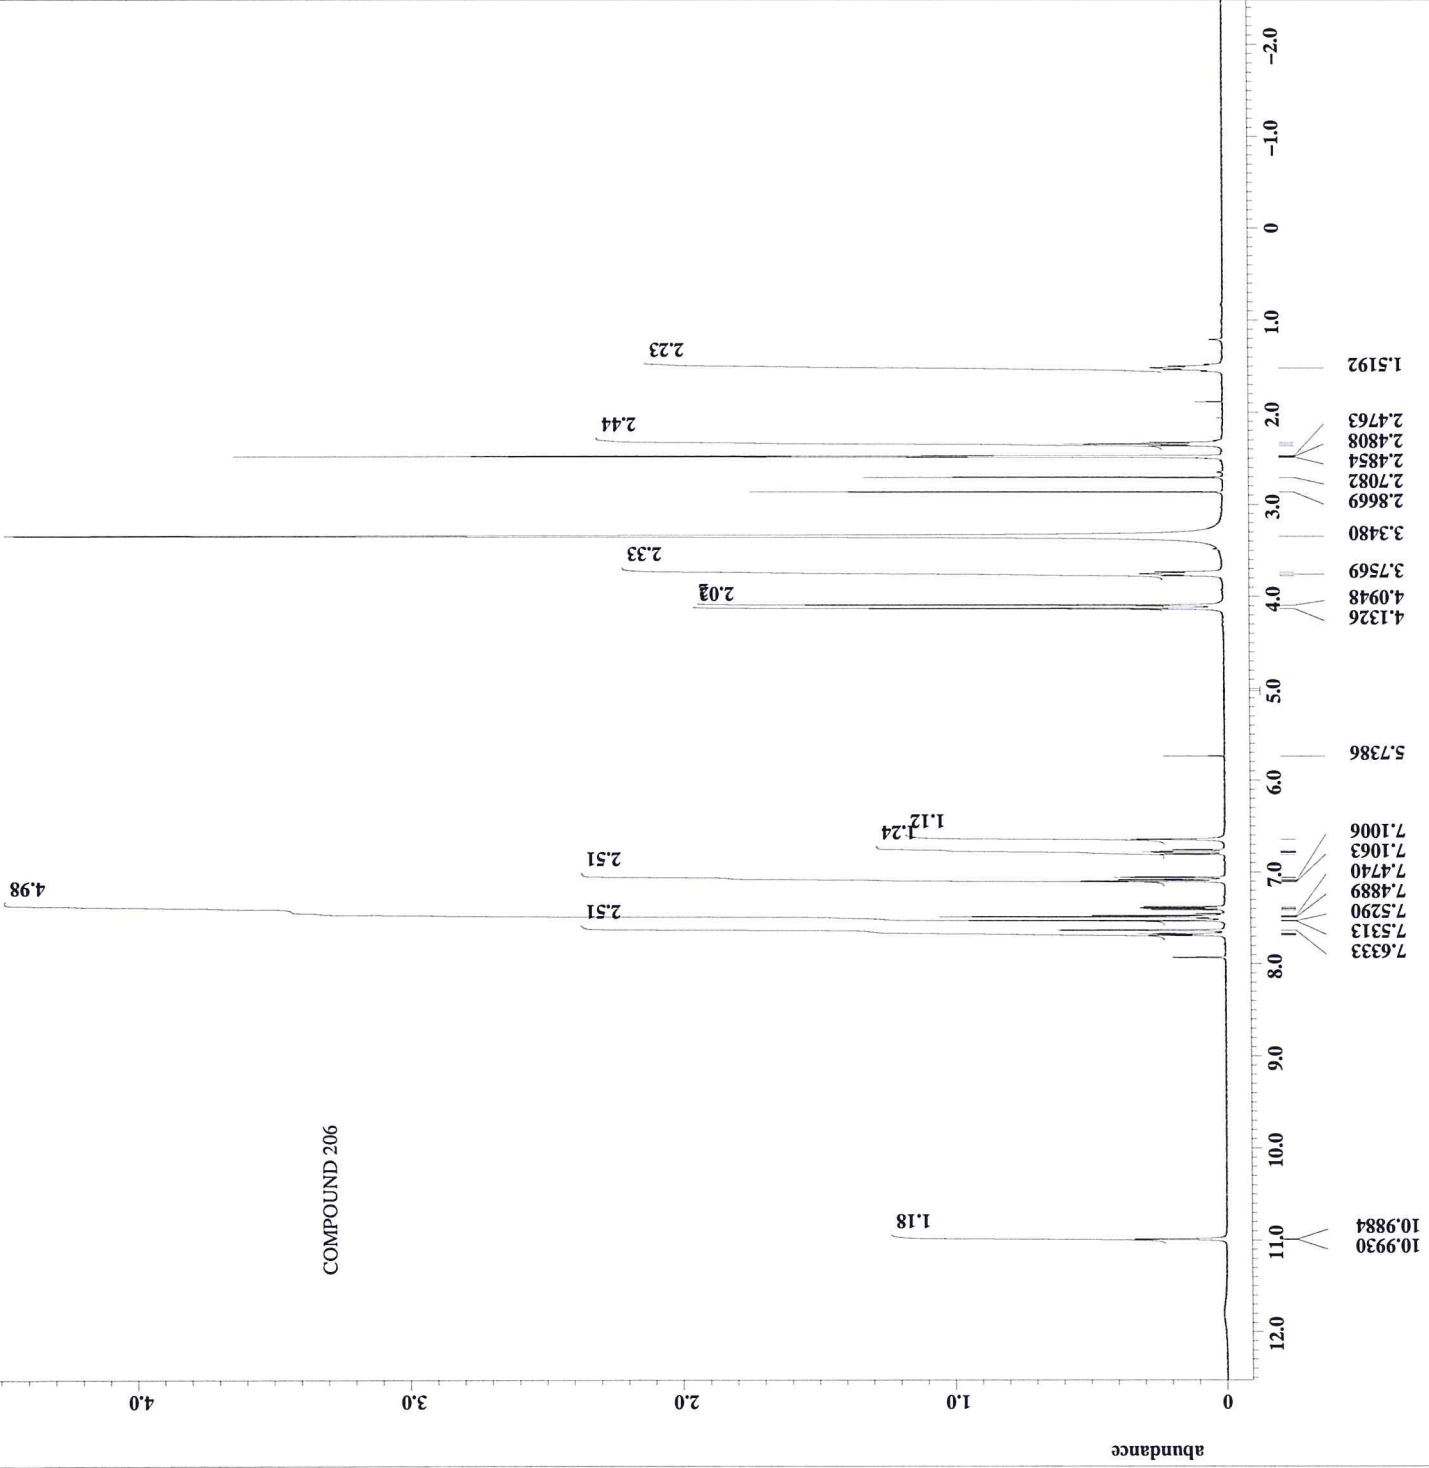

X : parts per Million : 1H

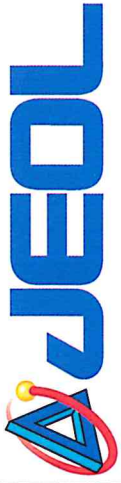

Filename = KS-I-61-C\_L\_CARBON-5.  
Author = Delta  
Experiment = single\_pulse\_dec  
Sample\_id = KS-I-61-C\_L  
Solvent = DMSO-D6  
Creation\_time = 18-AUG-2019 08:06:46  
Revision\_time = 24-MAR-2021 13:32:10  
Current\_time = 24-MAR-2021 13:32:23  
Data\_format = 1D COMPLEX  
Dim\_size = 26214  
Dim\_title = 13C  
Dim\_units = [ppm]  
Dimensions = X  
Site = ECS 400  
Spectrometer = JNM-ECS400  
Field\_strength = 9.389766[T] (400 [MHz])  
X\_acq\_duration = 1.04333312[s]  
X\_domain = 13C  
X\_freq = 100.52530333 [MHz]  
X\_points = 32768  
X\_prescans = 4  
X\_resolution = 0.95846665 [Hz]  
X\_sweep = 31.40703518 [kHz]  
Irr\_domain = 1H  
Irr\_freq = 399.78219838 [MHz]  
Irr\_offset = 5 [ppm]  
Clipped = FALSE  
Mod\_return = 1  
Scans = 48918  
Total\_scans = 48918  
X\_90\_width = 10.4 [us]  
X\_acq\_time = 1.04333312 [s]  
X\_angle = 30 [deg]  
X\_atn = 9 [dB]  
X\_pulse = 3.45666667 [us]  
Irr\_atn\_dec = 24.2 [dB]  
Irr\_atn\_noe = 24.2 [dB]  
Irr\_noise = WALTZ  
Decoupling = TRUE  
Initial\_wait = 1 [s]  
Noe\_time = TRUE  
Noe\_time = 2 [s]  
Recvr\_gain = 58  
Relaxation\_delay = 2 [s]  
Repetition\_time = 3.04333312 [s]  
Temp\_get = 25 [dC]

COMPOUND 206

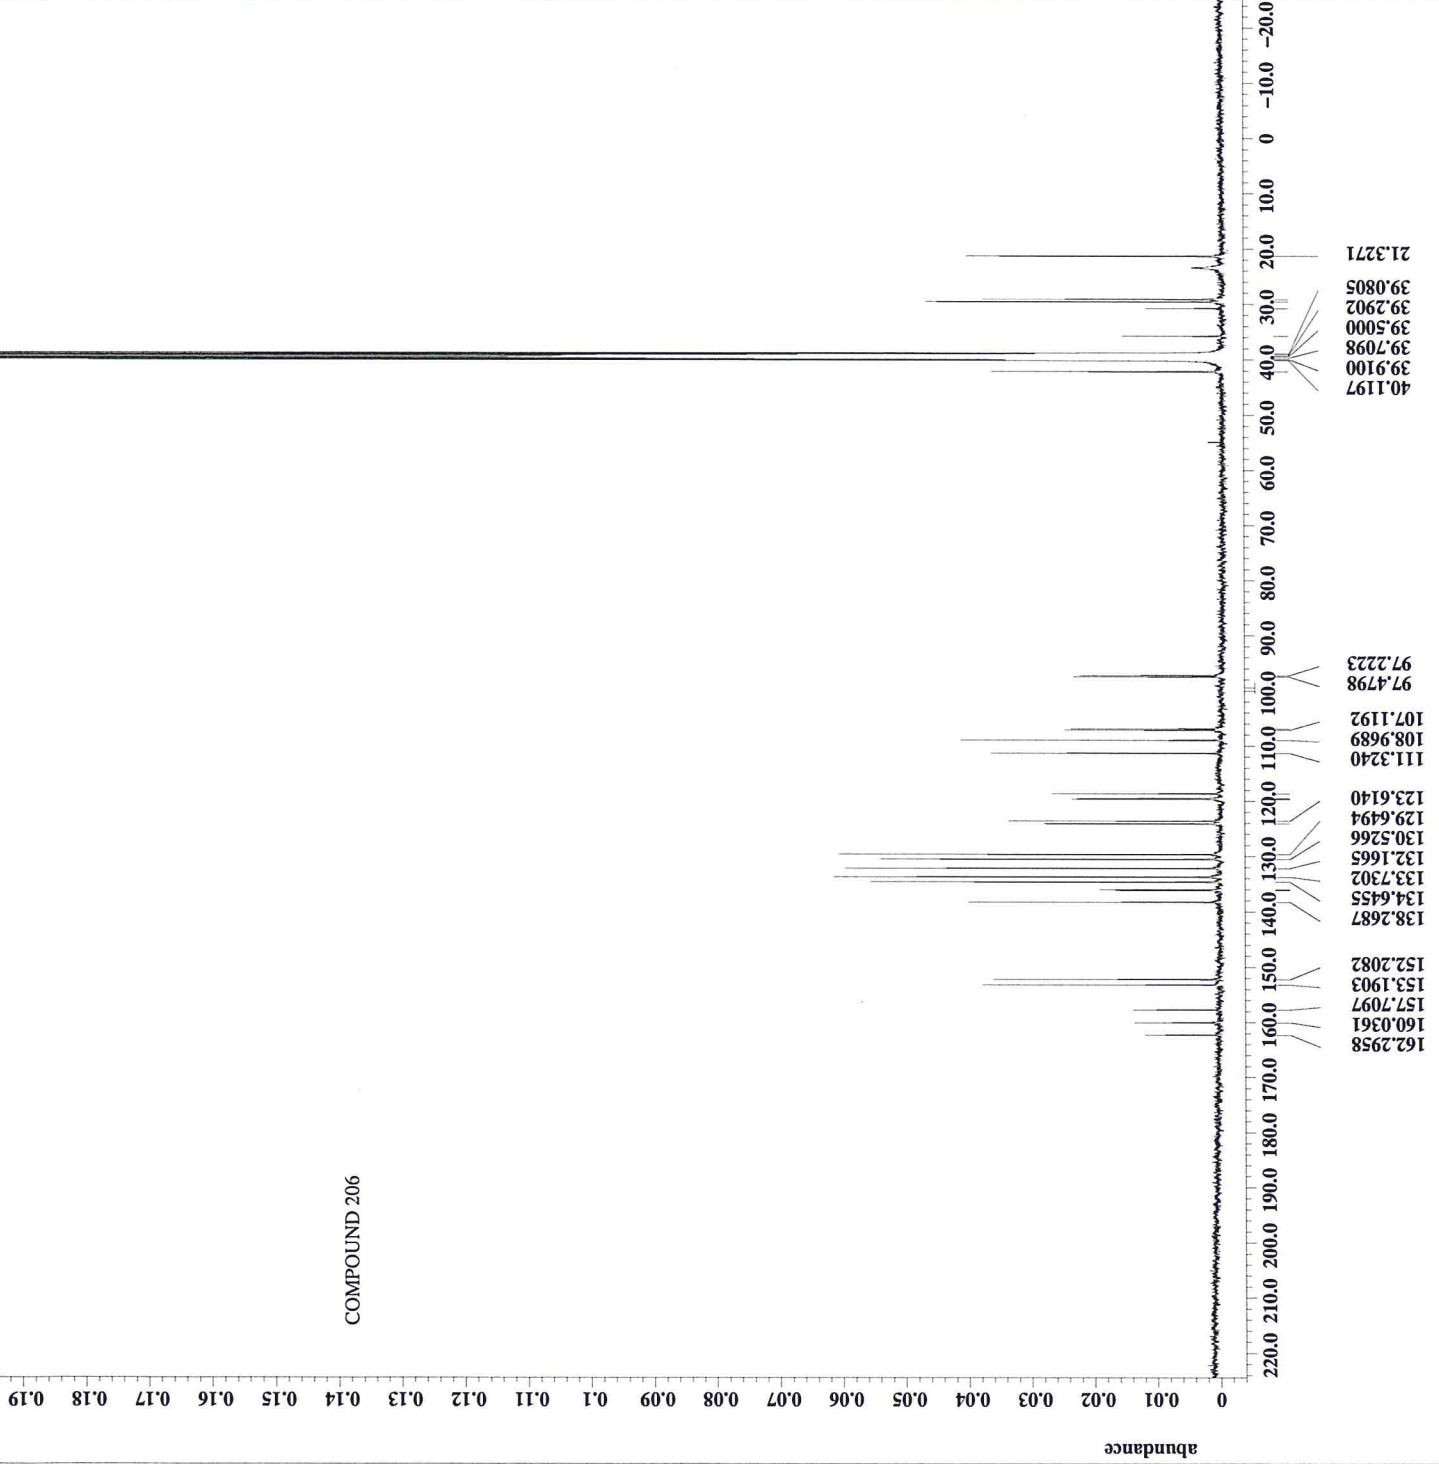

X : parts per Million : 13C

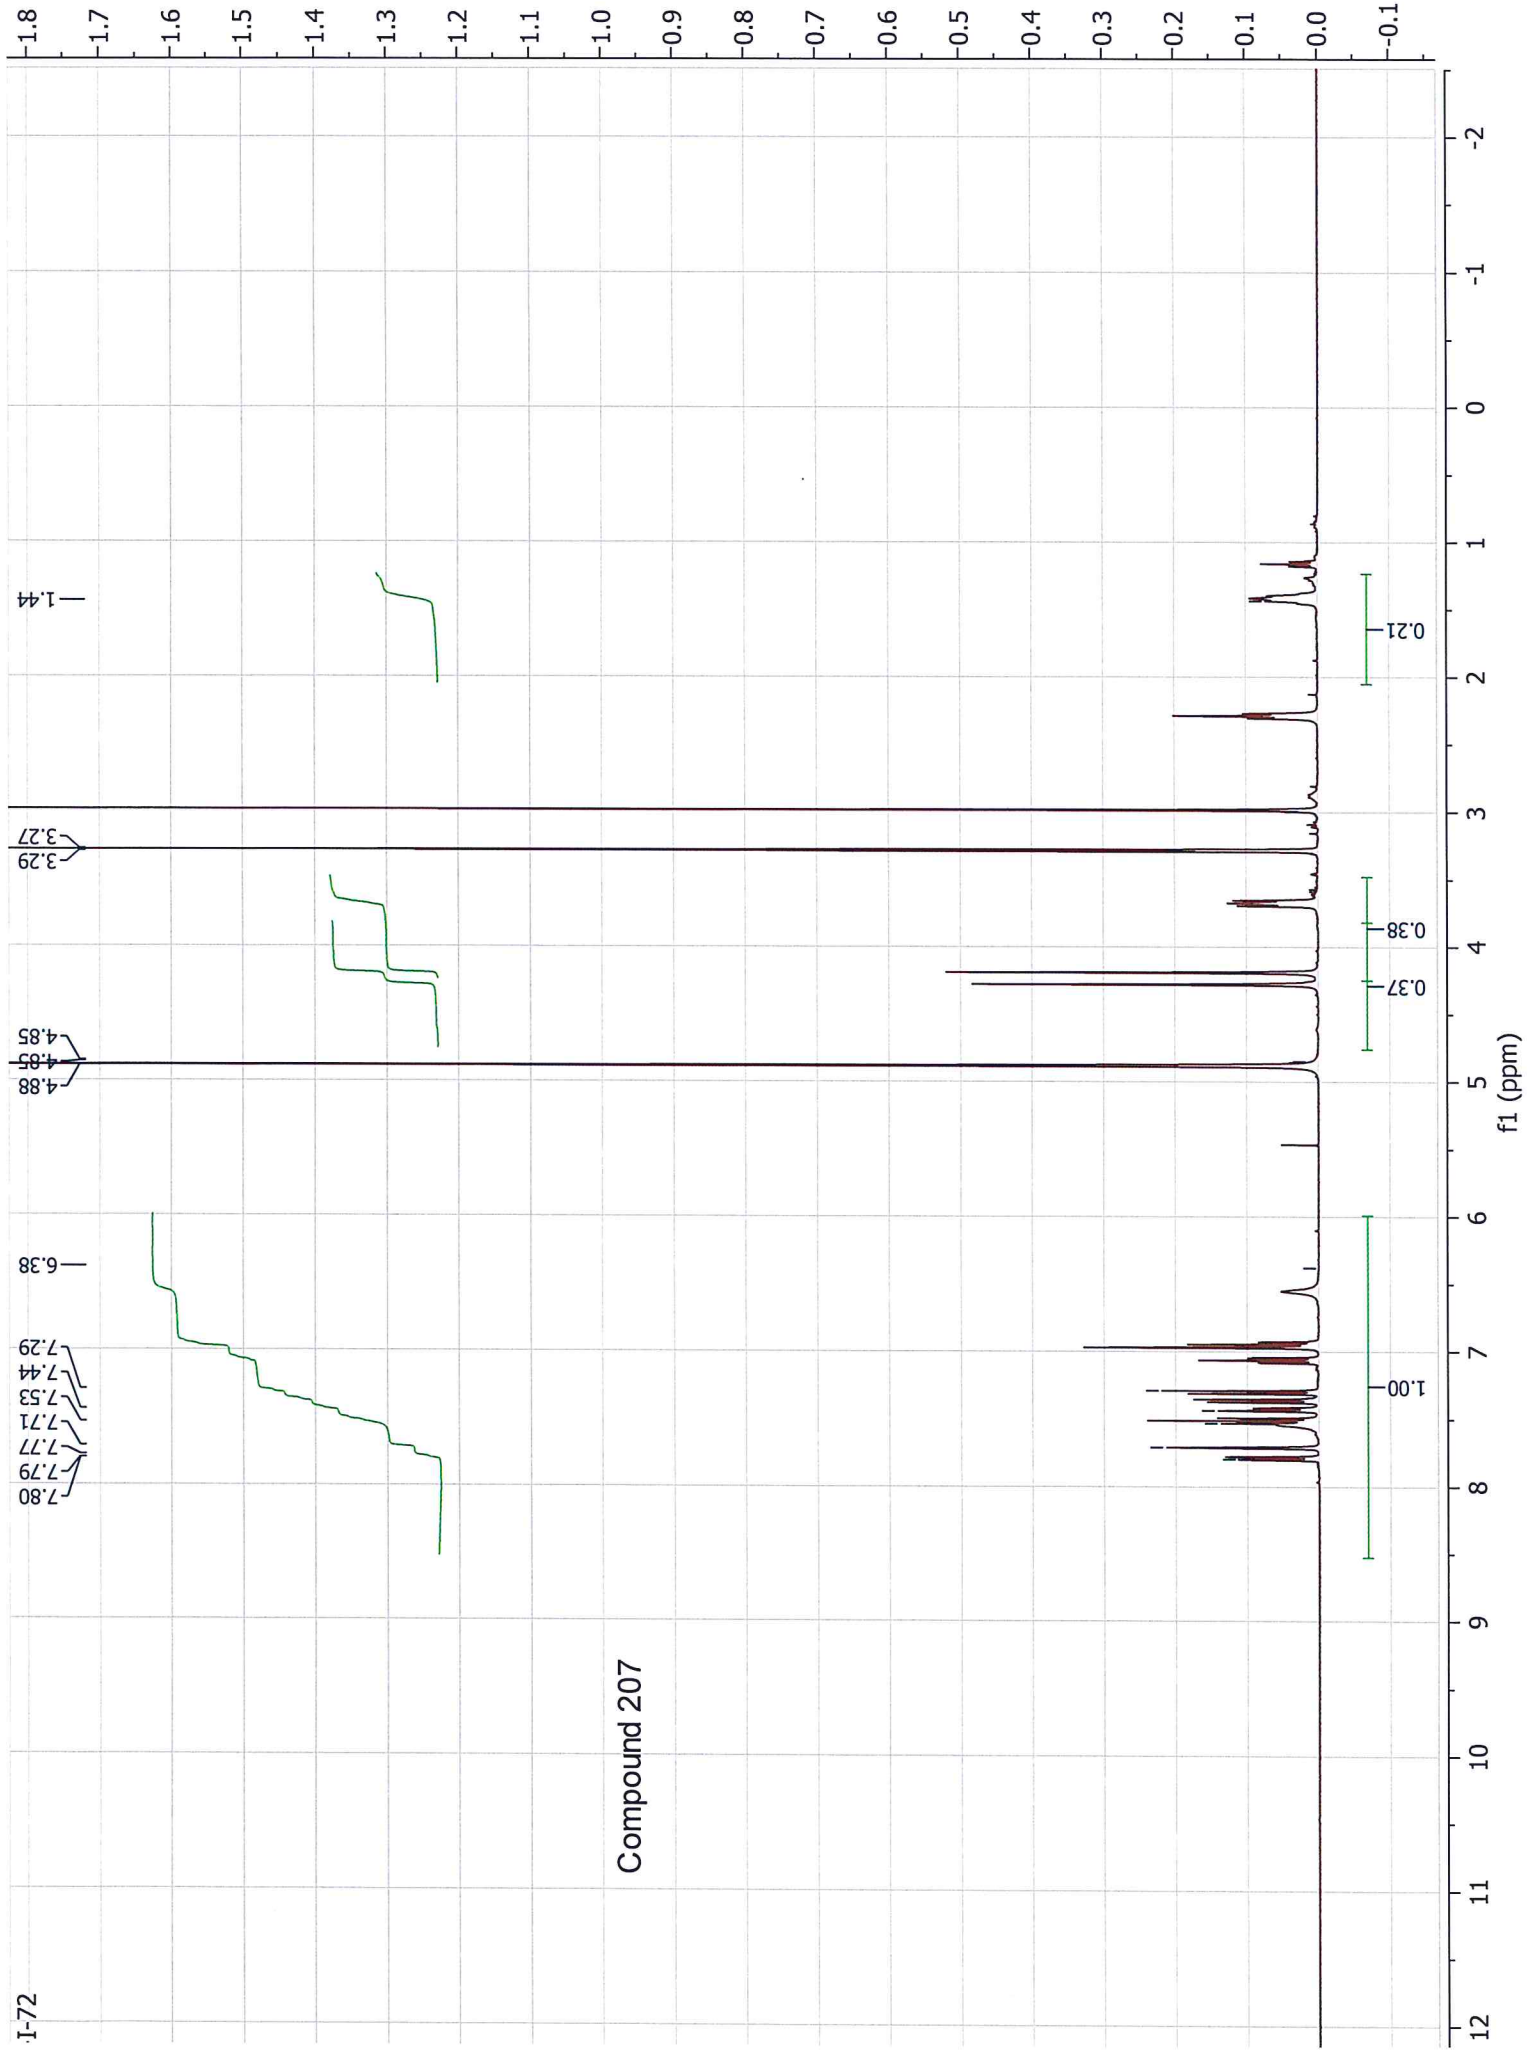



### Compound 207

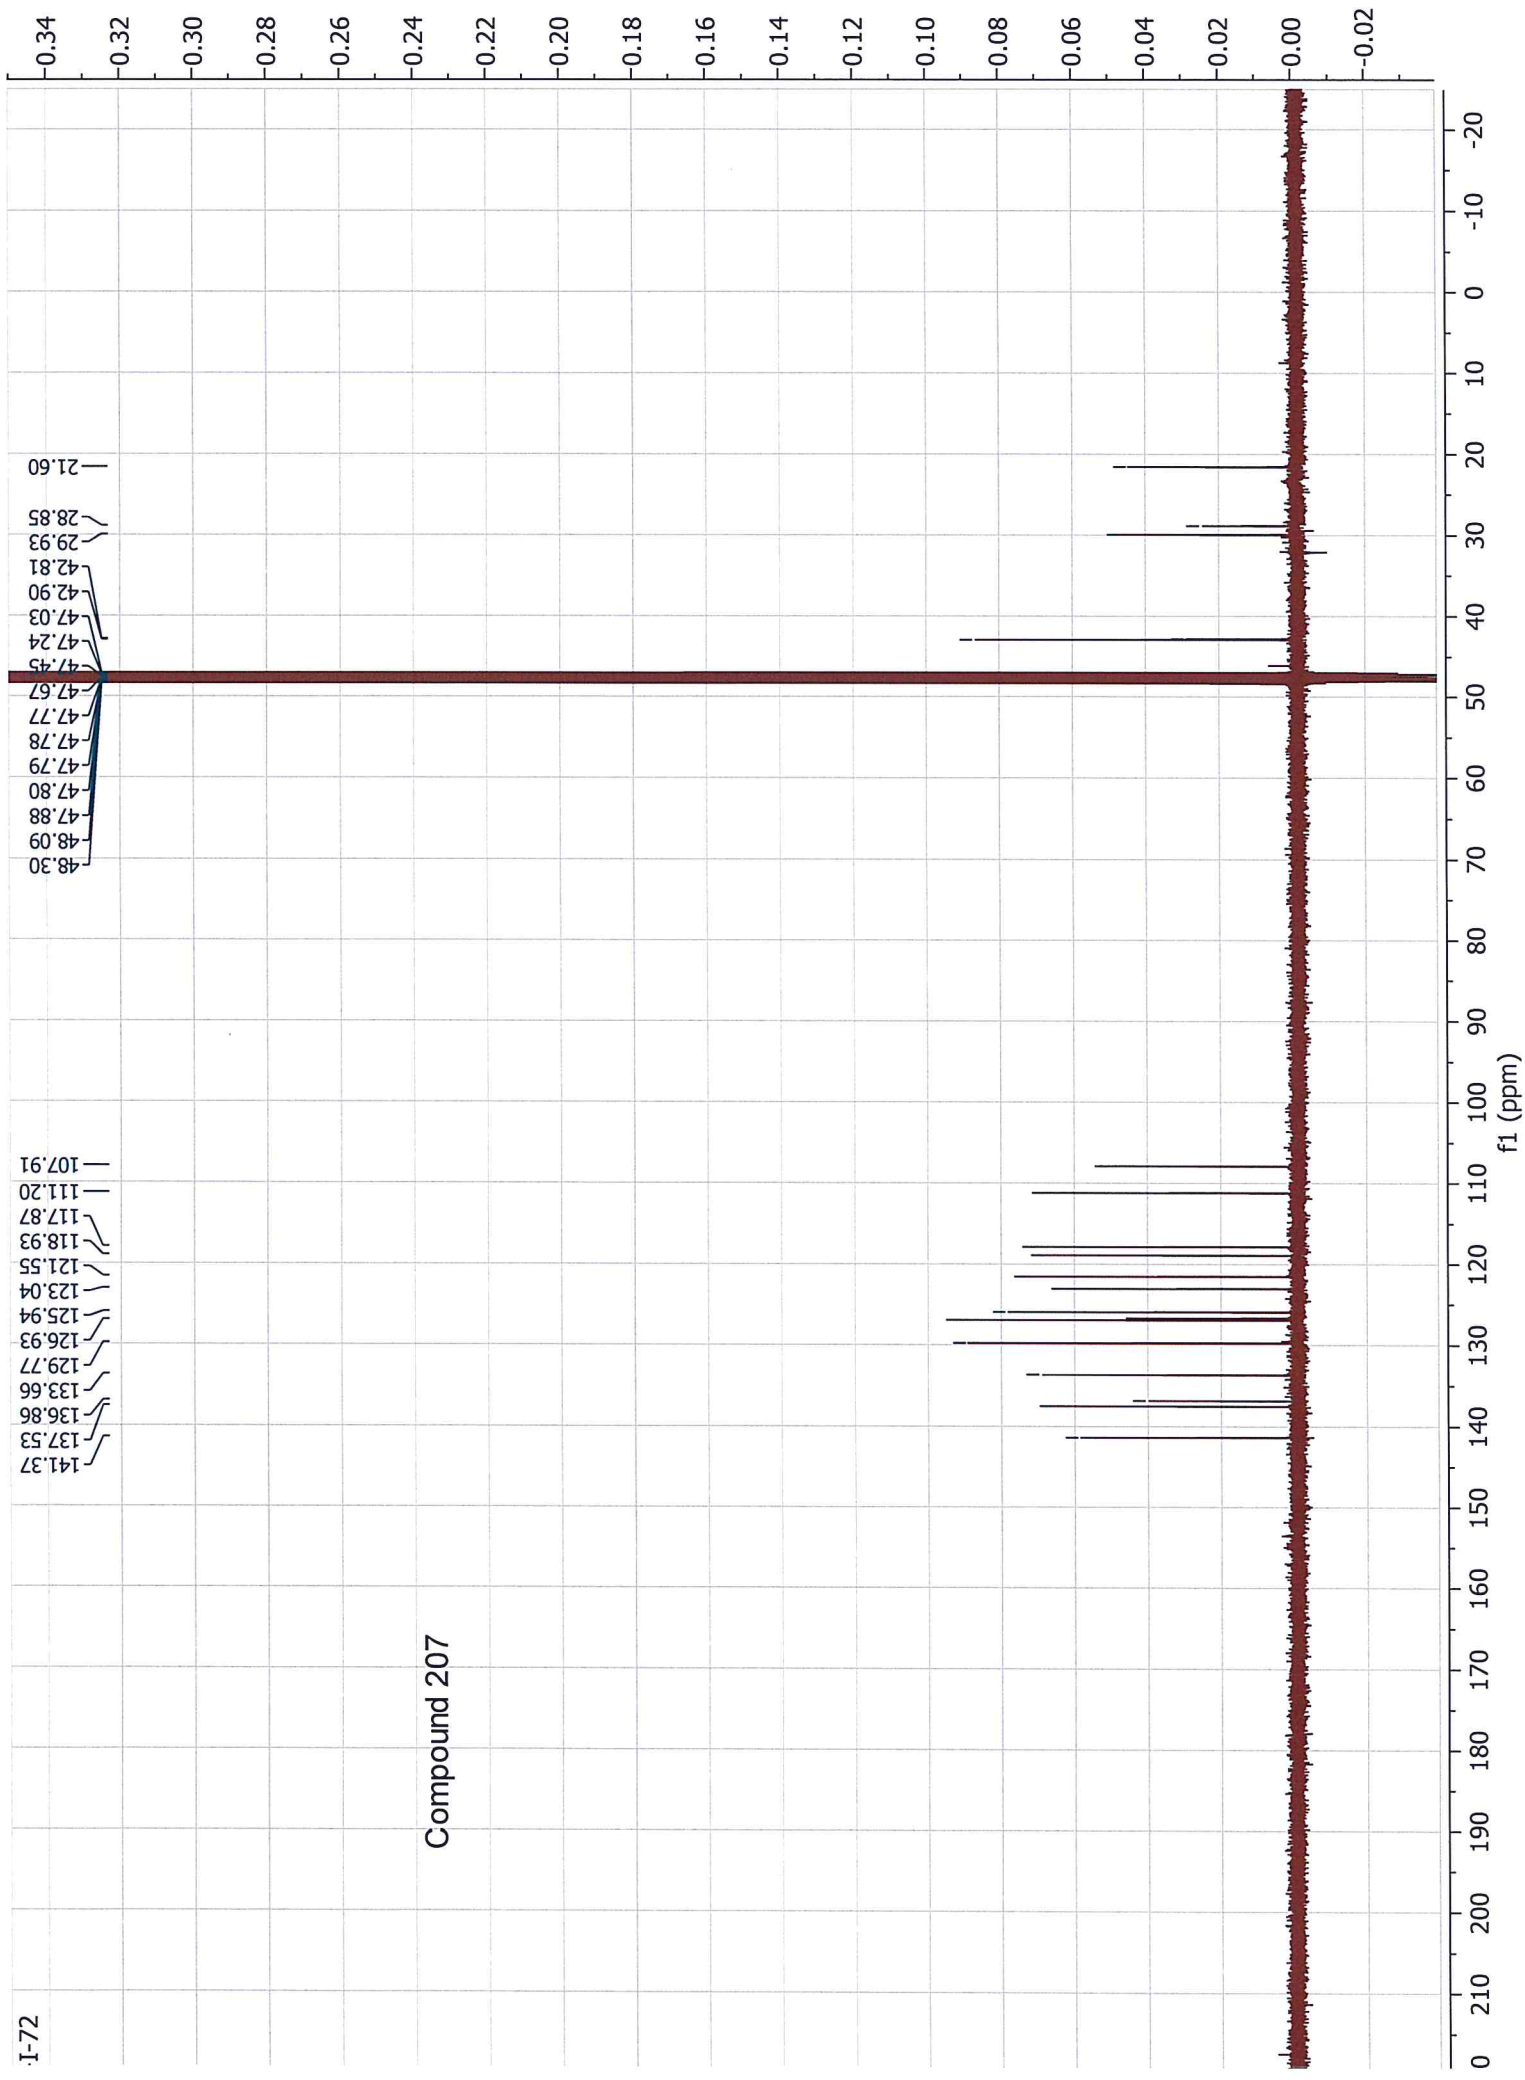

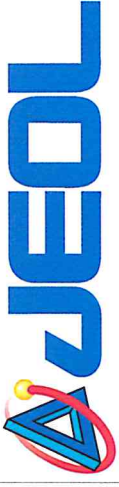

Filename = KS-I-50-C\_M\_CARBON-4.  
Author = Delta  
Experiment = single\_pulse\_dec  
Sample\_id = KS-I-50-C\_M  
Solvent = METHANOL-D3  
Creation\_time = 24-JUN-2019 07:10:59  
Revision\_time = 18-MAR-2021 08:56:24  
Current\_time = 18-MAR-2021 08:56:28  
Data\_format = 1D COMPLEX  
Dim\_size = 26214  
Dim\_title = 13C  
Dim\_units = [ppm]  
Dimensions = X  
Site = ECS 400  
Spectrometer = JNM-ECS400  
Field\_strength = 9.389766[T] (400 [MHz])  
X\_acq\_duration = 1.04333312[s]  
X\_domain = 13C  
X\_freq = 100.52530333 [MHz]  
X\_points = 32768  
X\_prescans = 4  
X\_resolution = 0.95846665 [Hz]  
X\_sweep = 31.40703518 [kHz]  
Irr\_domain = 1H  
Irr\_freq = 399.78219838 [MHz]  
Irr\_offset = 5 [ppm]  
Clipped = FALSE  
Mod\_return = 1  
Scans = 50749  
Total\_scans = 50749  
X\_90\_width = 10.4 [us]  
X\_acq\_time = 1.04333312 [s]  
X\_angle = 30 [deg]  
X\_atn = 9 [dB]  
X\_pulse = 3.45666667 [us]  
Irr\_atn\_dec = 24.2 [dB]  
Irr\_atn\_noe = 24.2 [dB]  
Irr\_noise = WALTZ  
Decoupling = TRUE  
Initial\_wait = 1 [s]  
Noe\_time = TRUE  
Noe\_time = 2 [s]  
Recvr\_gain = 58  
Relaxation\_delay = 2 [s]  
Repetition\_time = 3.04333312 [s]  
Temp\_get = 19.4 [dC]

COMPOUND 208

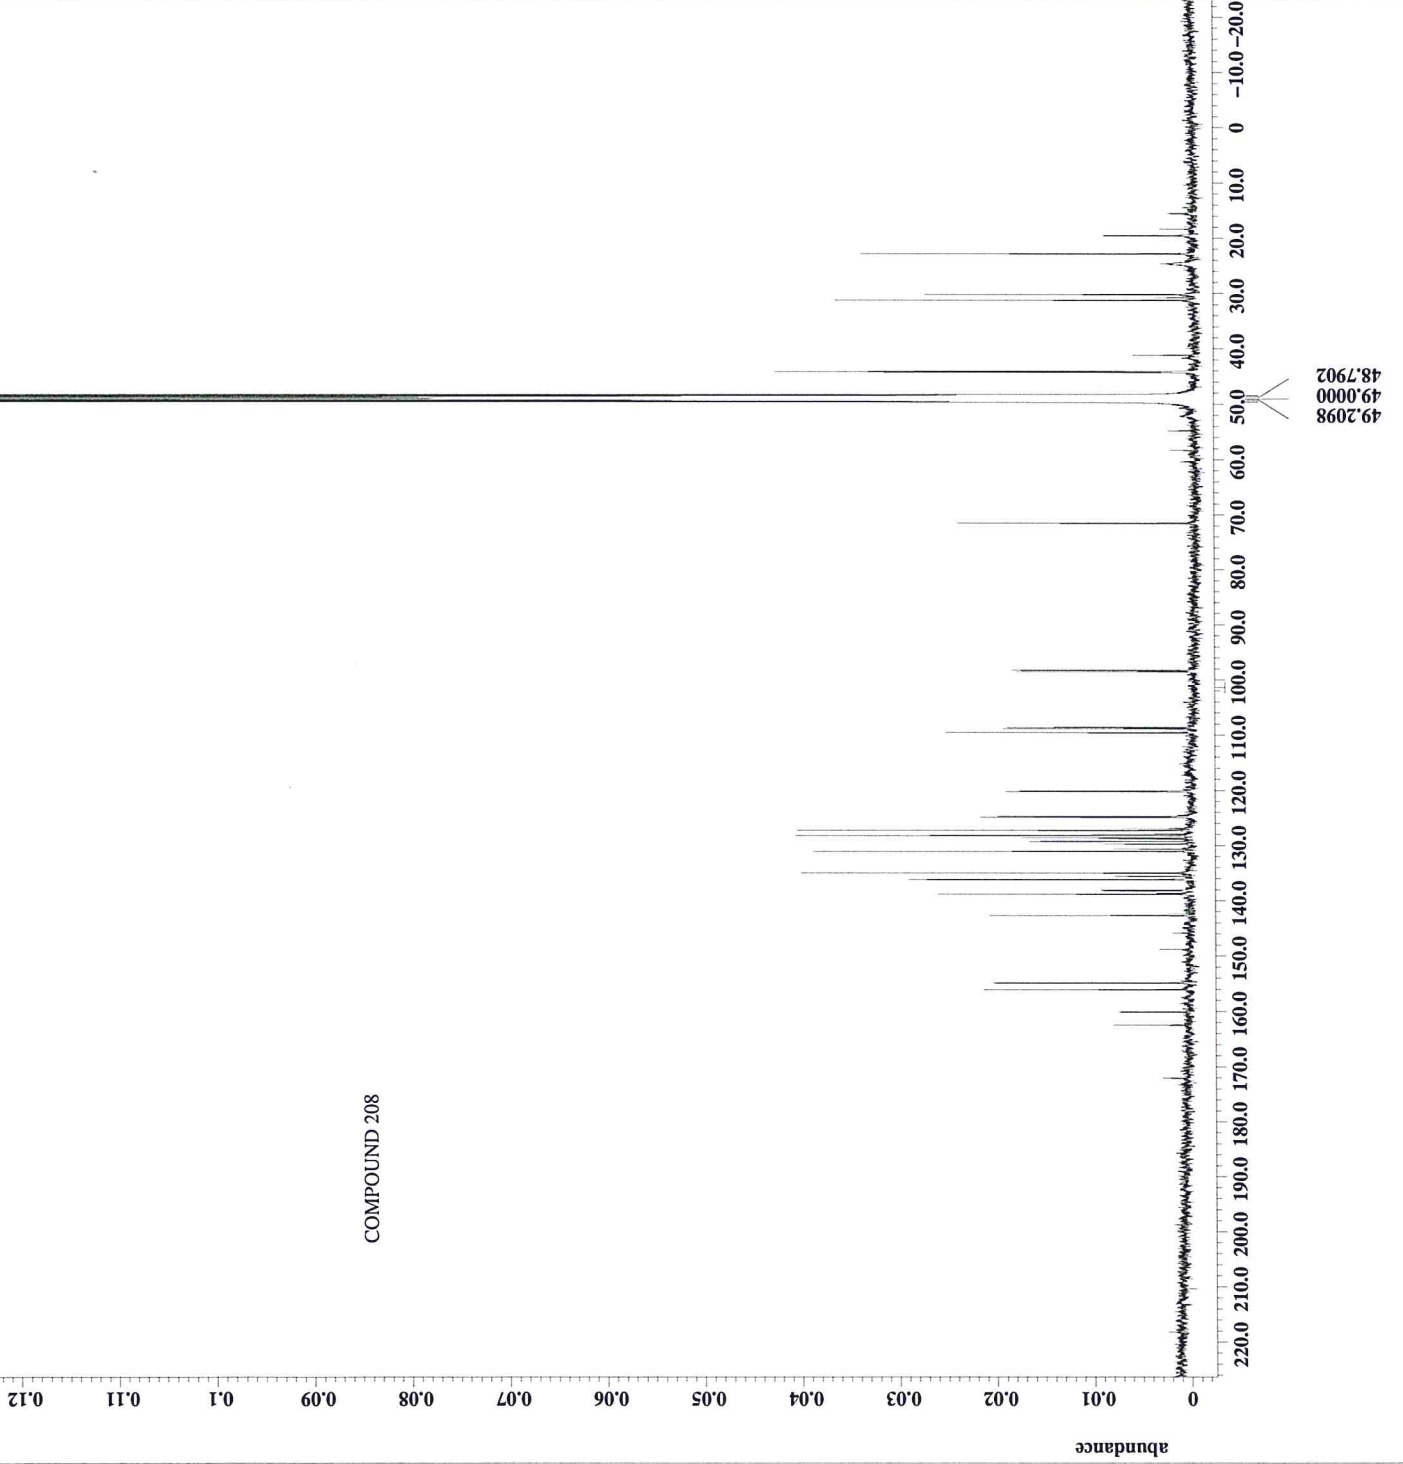

X : parts per Million : 13C

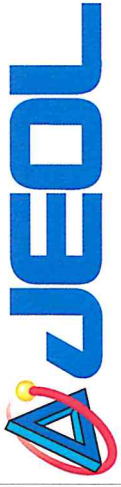

Filename = KS-I-50-C1\_PROTON-5.j  
Author = Delta  
Experiment = single\_pulse.ex2  
Sample\_id = KS-I-50-C1  
Solvent = DMSO-D6  
Creation\_time = 20-JUN-2019 15:07:08  
Revision\_time = 18-MAR-2021 08:50:52  
Current\_time = 18-MAR-2021 08:50:59  
Data\_format = 1D COMPLEX  
Dim\_size = 13107  
Dim\_title = 1H  
Dim\_units = [ppm]  
Dimensions = X  
Site = ECS 400  
Spectrometer = JNM-ECS400  
Field\_strength = 9.389766[T] (400 [MHz])  
X\_acq\_duration = 2.18365952[s]  
X\_domain = 1H  
X\_freq = 399.78219838 [MHz]  
X\_offset = 5 [ppm]  
X\_points = 16384  
X\_prescans = 1  
X\_resolution = 0.45794685 [Hz]  
X\_sweep = 7.5030012 [kHz]  
Irr\_domain = 1H  
Irr\_freq = 399.78219838 [MHz]  
Irr\_offset = 5 [ppm]  
Tri\_domain = 1H  
Tri\_freq = 399.78219838 [MHz]  
Tri\_offset = 5 [ppm]  
Clipped = FALSE  
Mod\_return = 1  
Scans = 4  
Total\_scans = 4  
X\_90\_width = 11.365 [us]  
X\_acq\_time = 2.18365952 [s]  
X\_angle = 45 [deg]  
X\_atn = 6 [dB]  
X\_pulse = 5.6825 [us]  
Irr\_mode = Off  
Tri\_mode = Off  
Dante\_preset = FALSE  
Initial\_wait = 1 [s]  
Recvr\_gain = 46  
Relaxation\_delay = 4 [s]  
Repetition\_time = 6.18365952 [s]  
Temp\_get = 19.2 [dC]

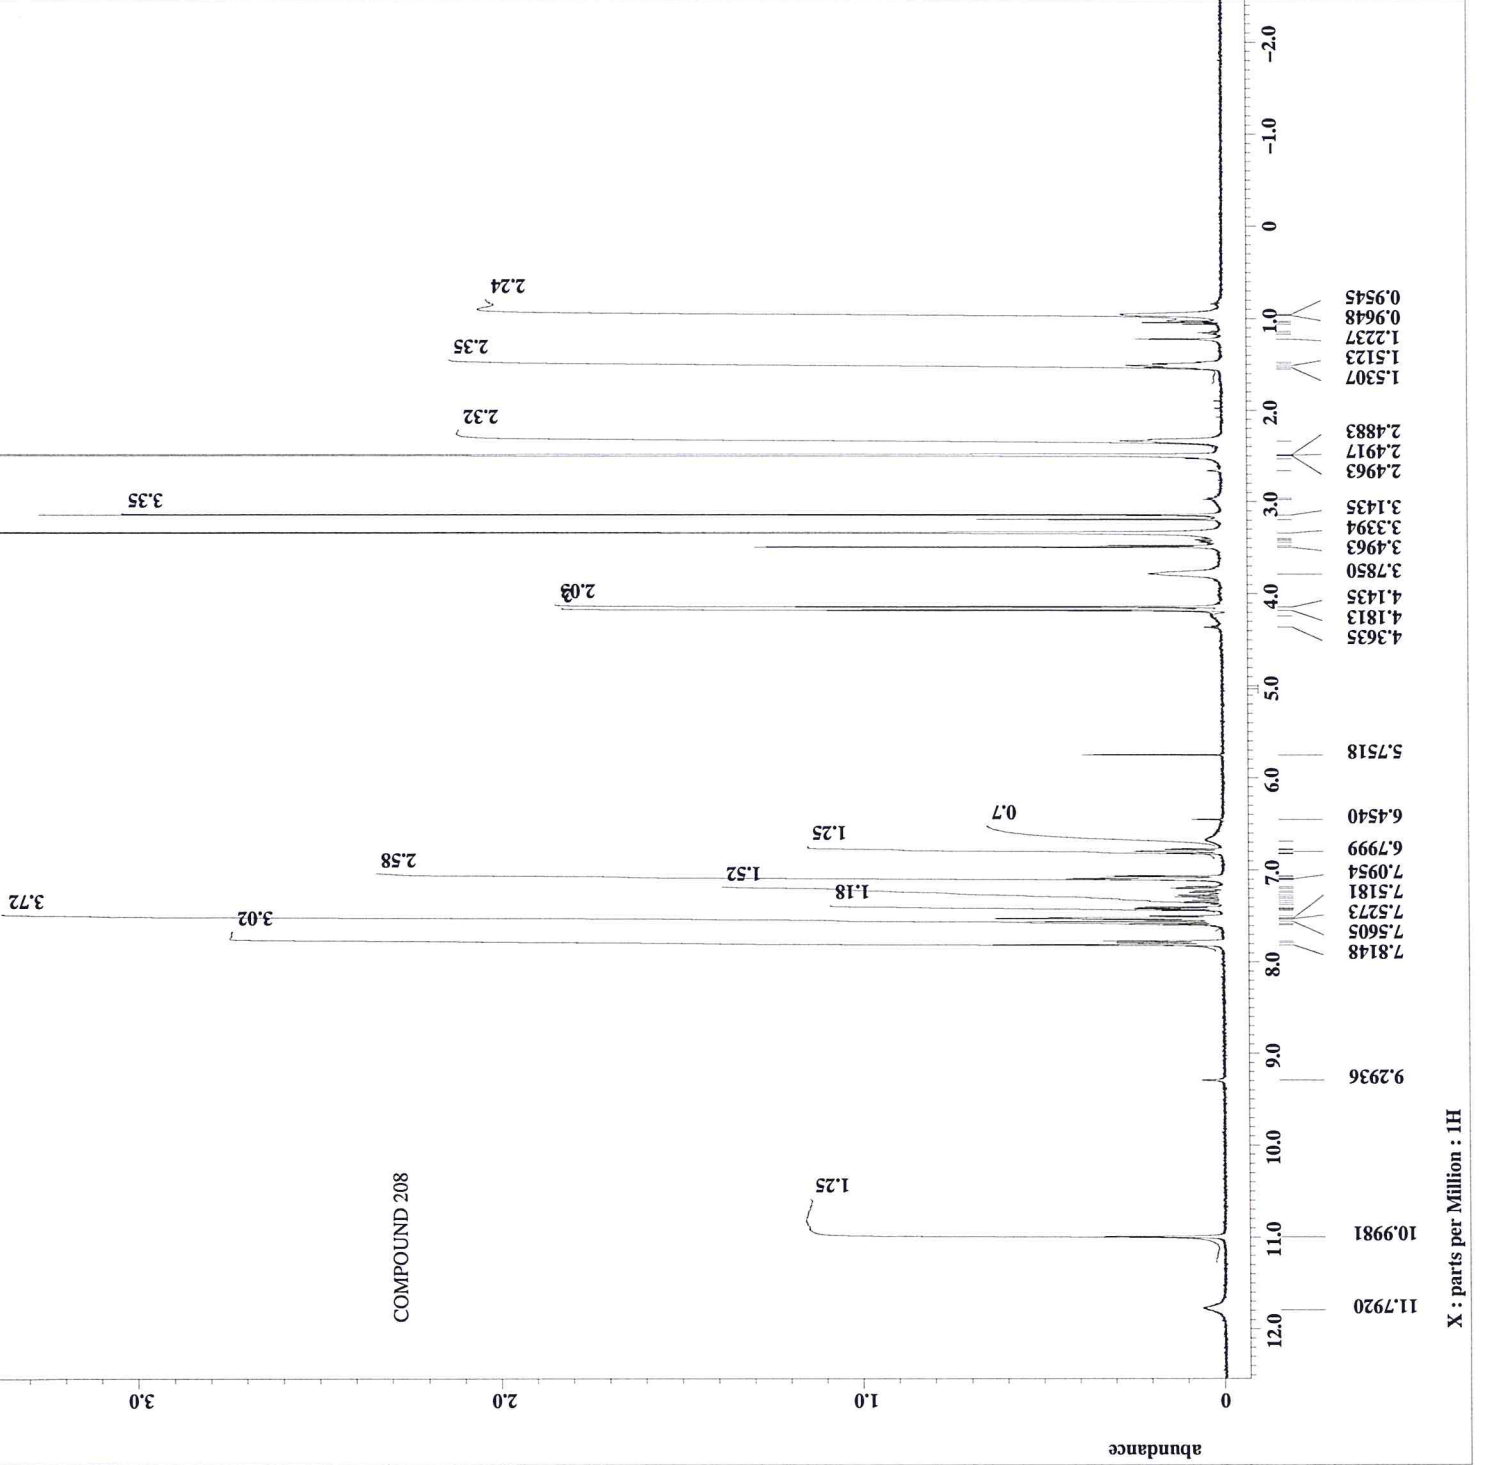

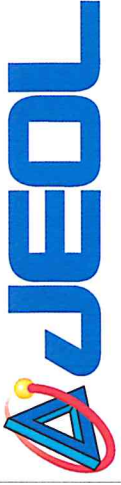

```

Filename = KS-I-27-C_PROTON-5.jd
Author = Delta
Experiment = single_pulse.ex2
Sample_id = KS-I-27-C
Solvent = METHANOL-D3
Creation_time = 13-MAR-2019 11:02:45
Revision_time = 11-MAR-2021 11:35:28
Current_time = 11-MAR-2021 11:35:32

Data_format = 1D COMPLEX
Dim_size = 13107
Dim_title = 1H
Dim_units = [ppm]
Dimensions = X
Site = ECS 400
Spectrometer = JNM-ECS400

Field_strength = 9.389766[T] (400[MHz])
X_acq_duration = 2.18365952[s]
X_domain = 1H
X_freq = 399.78219838[MHz]
X_offset = 5[ppm]
X_points = 16384
X_prescans = 1
X_resolution = 0.45794685[Hz]
X_sweep = 7.5030012[kHz]
Irr_domain = 1H
Irr_freq = 399.78219838[MHz]
Irr_offset = 5[ppm]
Tri_domain = 1H
Tri_freq = 399.78219838[MHz]
Tri_offset = 5[ppm]
Clipped = FALSE
Mod_return = 1
Scans = 4
Total_scans = 4

X_90_width = 11.365[us]
X_acq_time = 2.18365952[s]
X_angle = 45[deg]
X_atn = 6[db]
X_pulse = 5.6825[us]
Irr_mode = Off
Tri_mode = Off
Danta_presat = FALSE
Initial_wait = 1[s]
Recvr_gain = 46
Relaxation_delay = 4[s]
Repetition_time = 6.18365952[s]
Temp_get = 18.9[dc]
  
```

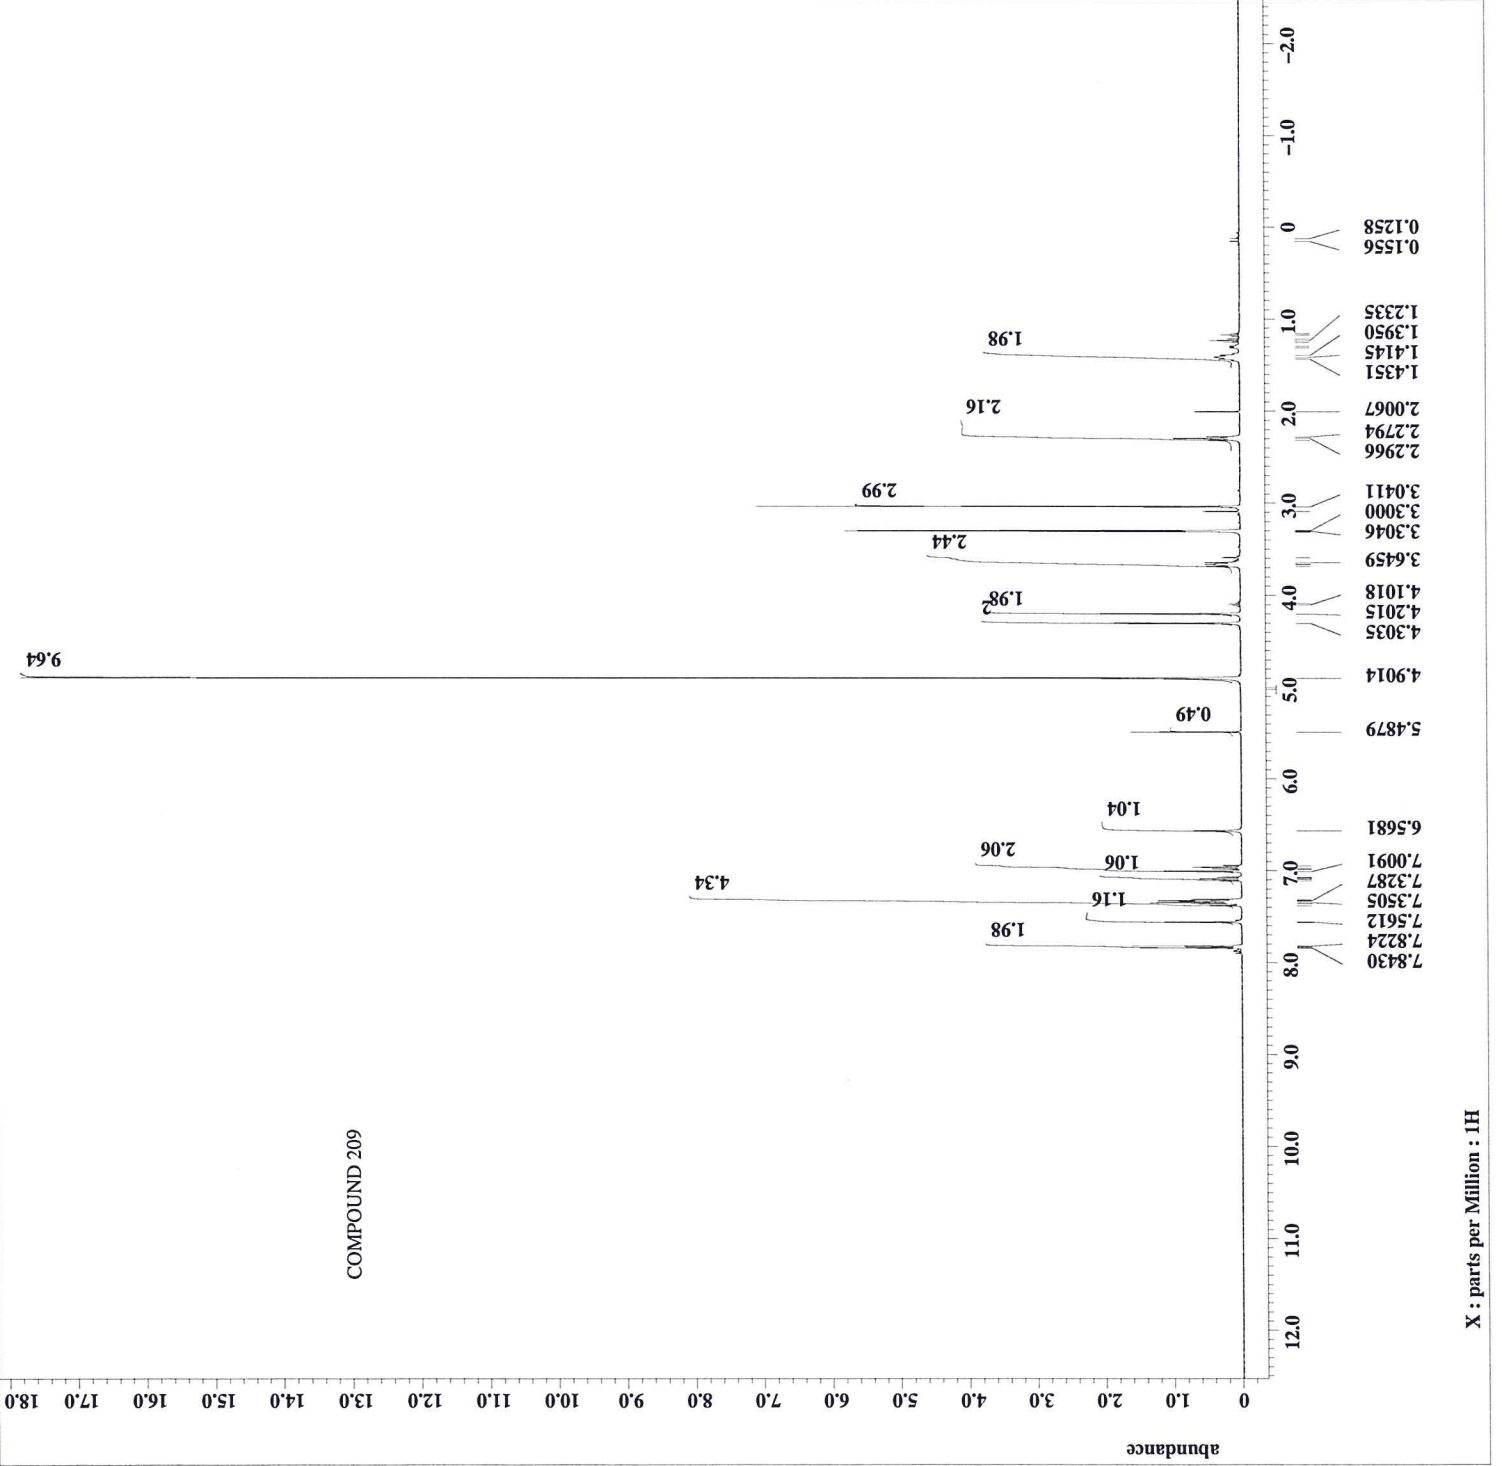

X : parts per Million : 1H



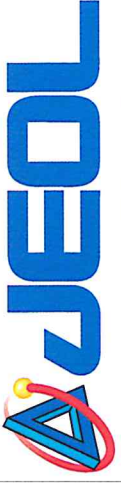

File: KS-I-27-C\_CARBON-5.jd  
Author: Delta  
Experiment: single\_pulse\_dec  
Sample ID: KS-I-27-C  
Solvent: METHANOL-D3  
Creation time: 14-MAR-2019 03:39:20  
Revision time: 11-MAR-2021 11:30:30  
Current time: 11-MAR-2021 11:30:39

Data format: 1D COMPLEX  
Dim size: 26214  
Dim title: 13C  
Dim units: [ppm]  
Dimensions: X  
Site: ECS 400  
Spectrometer: JNM-ECS400

Field strength: 9.389766 [T] (400 [MHz])  
X\_acq\_duration: 1.04333312 [s]  
X\_domain: 13C  
X\_freq: 100.52530333 [MHz]  
X\_offset: 100 [ppm]  
X\_points: 32768  
X\_prescans: 4  
X\_resolution: 0.95846665 [Hz]  
X\_sweep: 31.40703518 [kHz]  
Irr\_domain: 1H  
Irr\_freq: 399.78219838 [MHz]  
Irr\_offset: 5 [ppm]  
Clipped: FALSE  
Mod\_return: 1  
Scans: 16000  
Total\_scans: 16000

X\_90\_width: 10.4 [us]  
X\_acq\_time: 1.04333312 [s]  
X\_angle: 30 [deg]  
X\_atn: 9 [dB]  
X\_pulse: 3.46666667 [us]  
Irr\_atn\_dec: 24.2 [dB]  
Irr\_atn\_noe: 24.2 [dB]  
Decoupling: WALTZ  
Initial\_wait: 1 [s]  
Noe: TRUE  
Noe\_time: 2 [s]  
Recvr\_gain: 60  
Relaxation\_delay: 2 [s]  
Repetition\_time: 3.04333312 [s]  
Temp\_get: 20.4 [dC]

COMPOUND 209

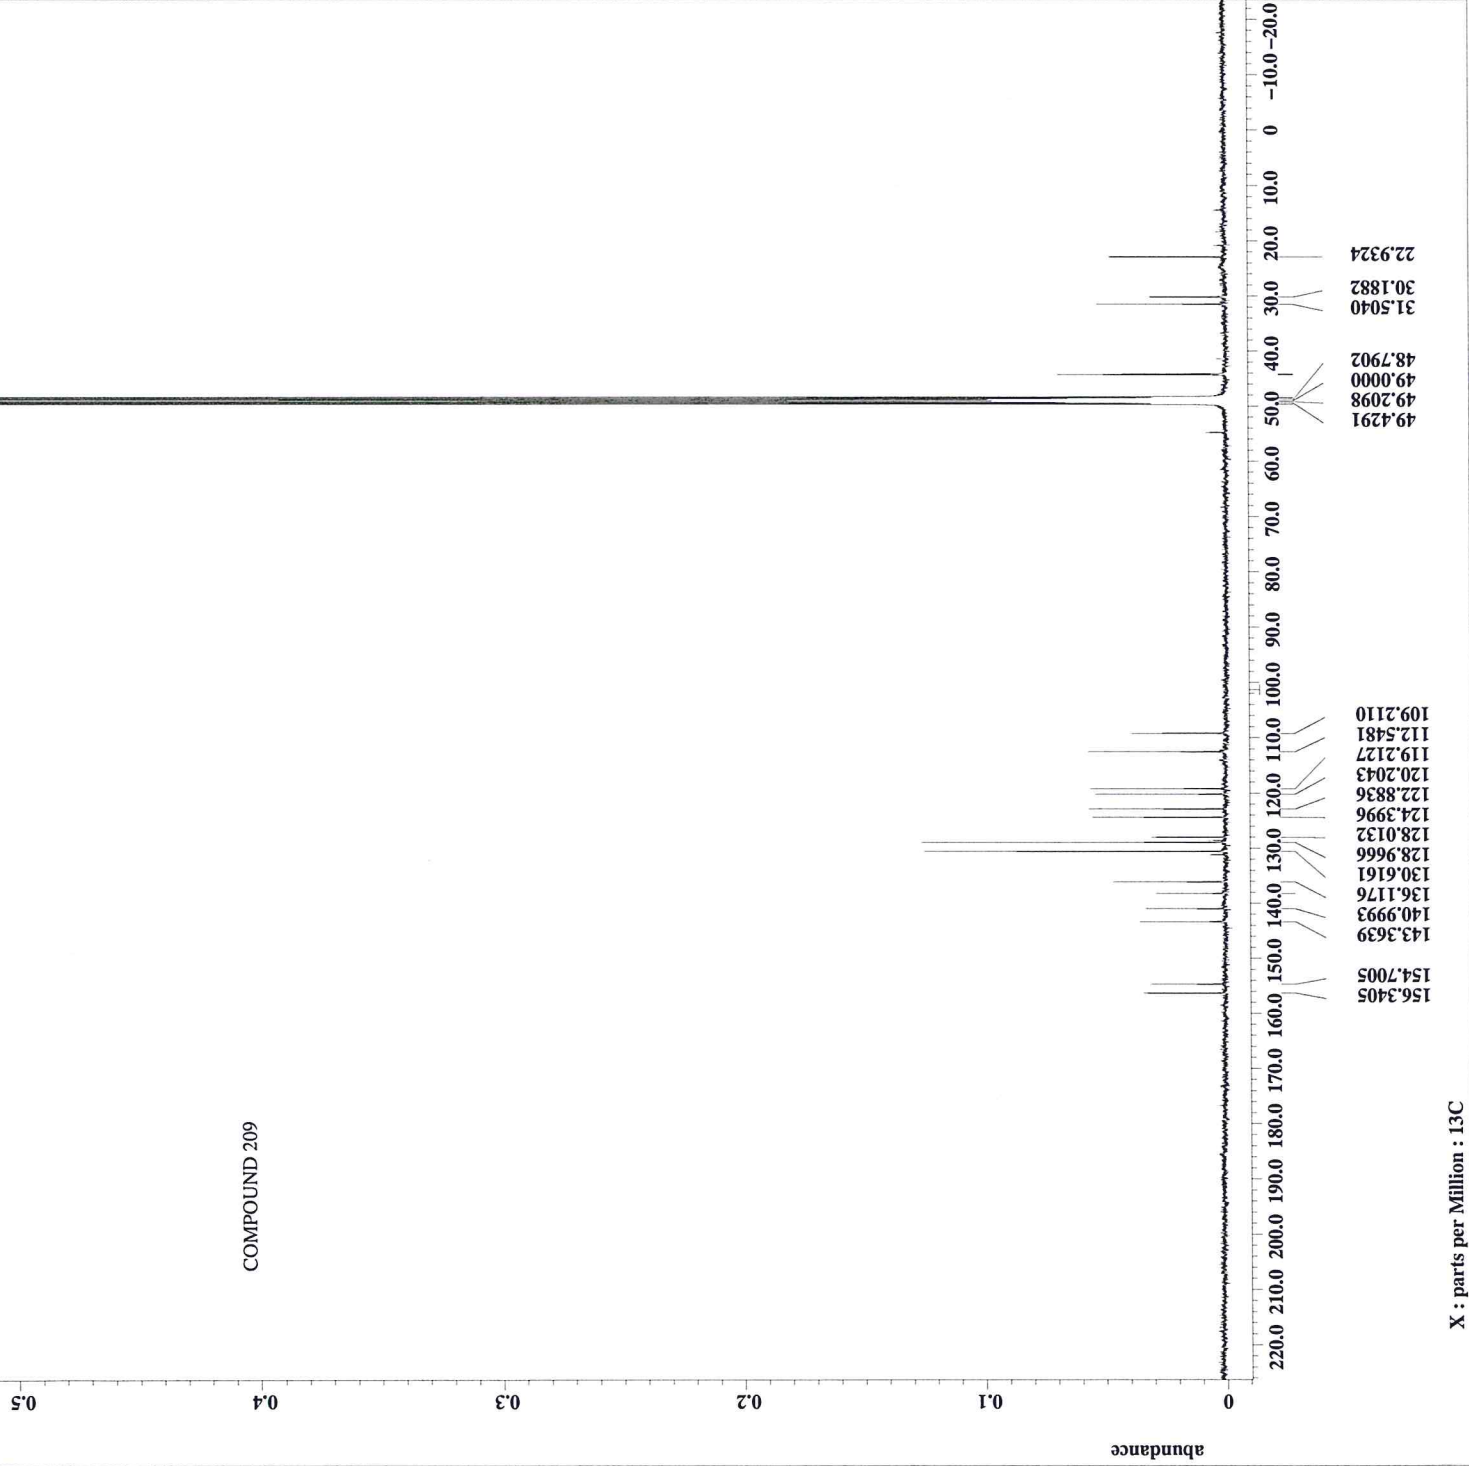

X : parts per Million : 13C

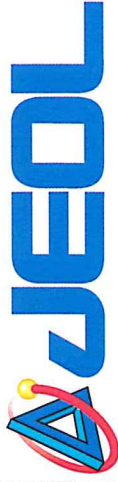

Filename = KS-I-48-C1\_PROTON-4.j  
Author = Delta  
Experiment = single\_pulse.ex2  
Sample\_id = KS-I-48-C1  
Solvent = METHANOL-D3  
Creation\_time = 25-JUN-2019 14:44:02  
Revision\_time = 16-MAR-2021 10:50:16  
Current\_time = 16-MAR-2021 10:50:32  
Data\_format = 1D COMPLEX  
Dim\_size = 13107  
Dim\_title = 1H  
Dim\_units = [ppm]  
Dimensions = X  
Site = ECS 400  
Spectrometer = JNM-ECS400  
Field\_strength = 9.389766[T] (400[MHz])  
X\_acq\_duration = 2.18365952[s]  
X\_domain = 1H  
X\_freq = 399.78219838[MHz]  
X\_offset = 5[ppm]  
X\_points = 16384  
X\_prescans = 1  
X\_resolution = 0.45794685[Hz]  
X\_sweep = 7.5030012[kHz]  
Irr\_domain = 1H  
Irr\_freq = 399.78219838[MHz]  
Irr\_offset = 5[ppm]  
Tri\_domain = 1H  
Tri\_freq = 399.78219838[MHz]  
Tri\_offset = 5[ppm]  
Clipped = FALSE  
Mod\_return = 1  
Scans = 4  
Total\_scans = 4  
X\_90\_width = 11.365[us]  
X\_acq\_time = 2.18365952[s]  
X\_angle = 45[deg]  
X\_atn = 6[db]  
X\_pulse = 5.6825[us]  
Irr\_mode = Off  
Tri\_mode = Off  
Dante\_presat = FALSE  
Initial\_wait = 1[s]  
Recvr\_gain = 46  
Relaxation\_delay = 4[s]  
Repetition\_time = 6.18365952[s]  
Temp\_get = 19.6[degC]

17.47

COMPOUND 210

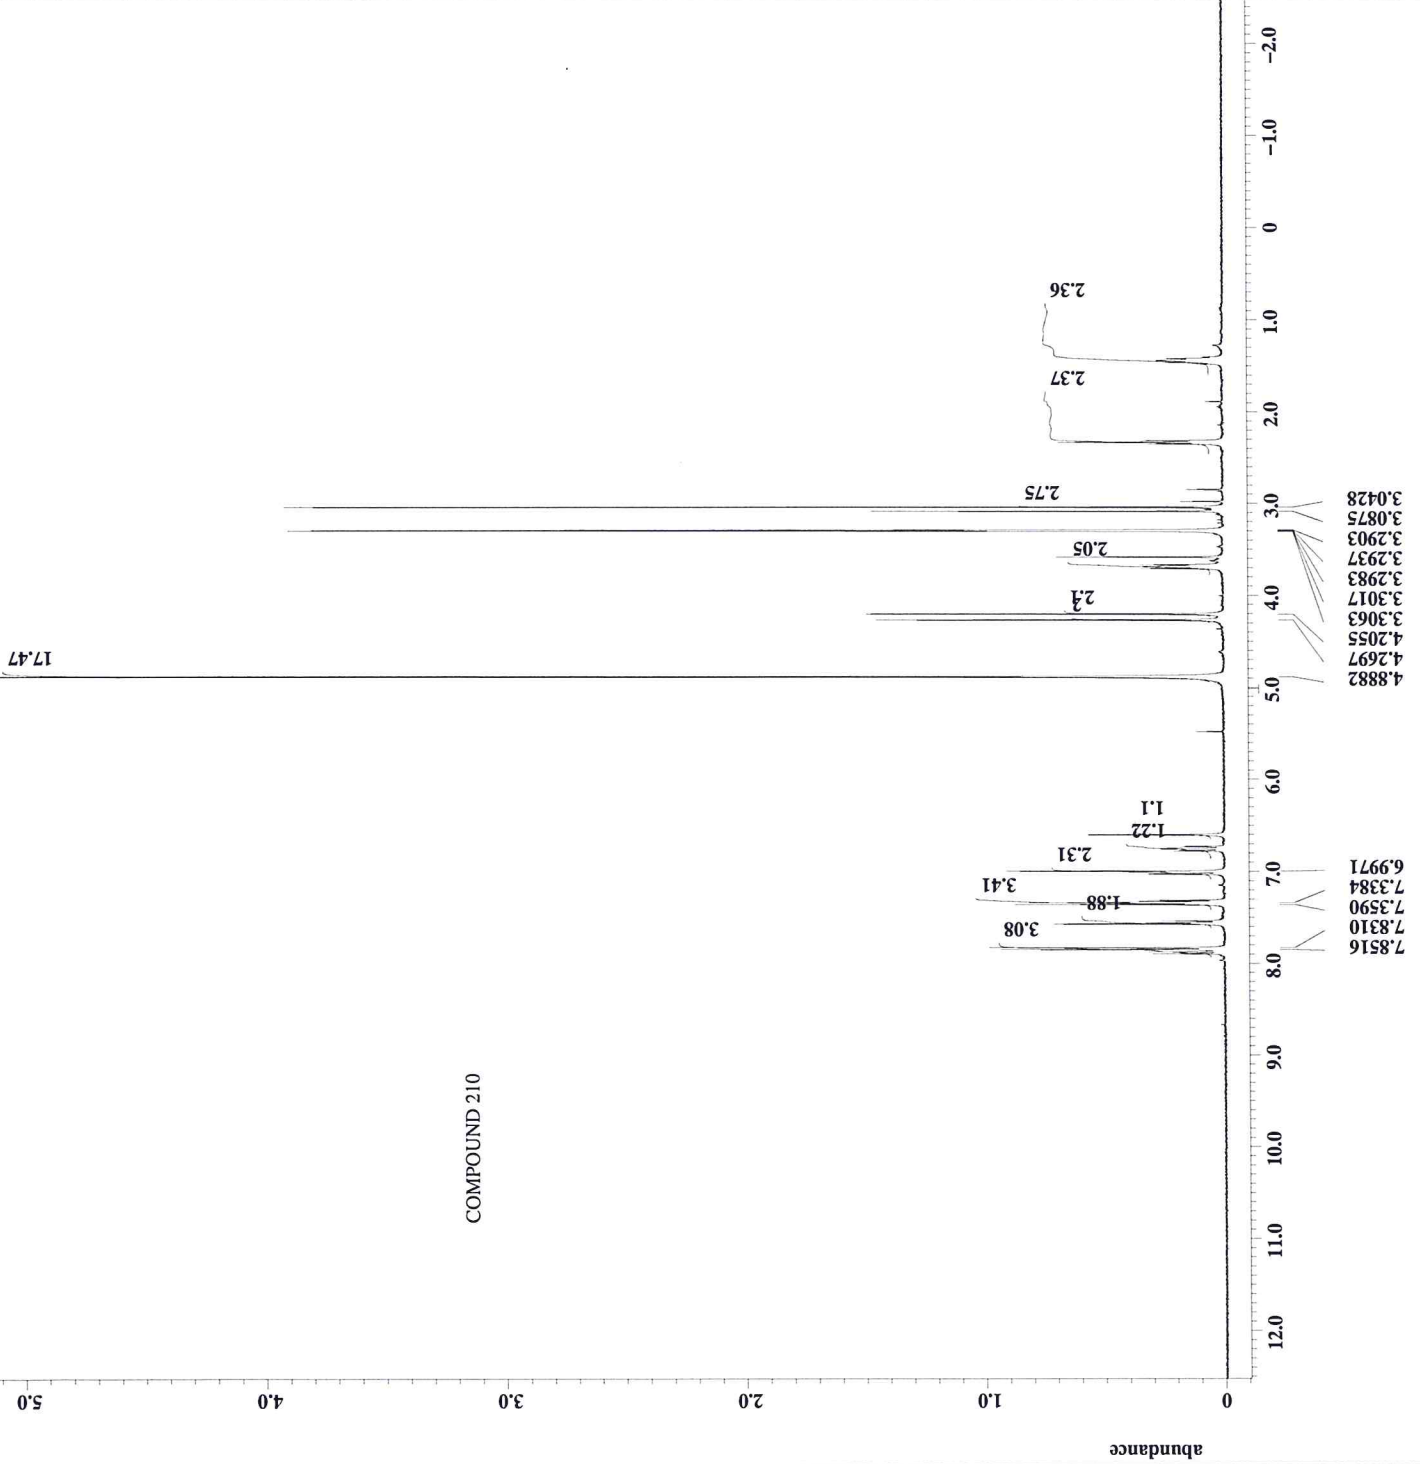

X : parts per Million : 1H

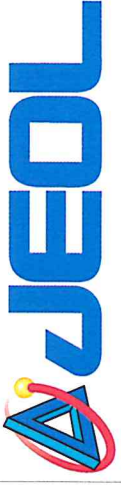

Filename = KS-I-48-C1\_CARBON-5.j  
Author = Delta  
Experiment = single\_pulse\_dec  
Sample\_id = KS-I-48-C1  
Solvent = METHANOL-D3  
Creation\_time = 1-JUL-2019 06:05:52  
Revision\_time = 16-MAR-2021 10:52:35  
Current\_time = 16-MAR-2021 10:52:57  
Data\_format = 1D COMPLEX  
Dim\_size = 26214  
Dim\_title = 13C  
Dim\_units = [ppm]  
Dimensions = X  
Site = ECS 400  
Spectrometer = JNM-ECS400  
Field\_strength = 9.389766[T] (400 [MHz])  
X\_acq\_duration = 1.04333312[s]  
X\_domain = 13C  
X\_freq = 100.52530333 [MHz]  
X\_offset = 100 [ppm]  
X\_points = 32768  
X\_resolution = 4  
X\_resolution = 0.95846665 [Hz]  
X\_sweep = 31.40703518 [kHz]  
Irr\_domain = 1H  
Irr\_freq = 399.78219838 [MHz]  
Irr\_offset = 5 [ppm]  
Clipped = FALSE  
Mod\_return = 1  
Scans = 42560  
Total\_scans = 42560  
X\_90\_width = 10.4 [us]  
X\_acq\_time = 1.04333312 [s]  
X\_angle = 30 [deg]  
X\_atn = 9 [dB]  
X\_pulse = 3.46666667 [us]  
Irr\_atn\_dec = 24.2 [dB]  
Irr\_atn\_noe = 24.2 [dB]  
Irr\_noise = WALTZ  
Decoupling = TRUE  
Initial\_wait = 1 [s]  
Noe\_time = TRUE  
Noe\_time = 2 [s]  
Recvr\_gain = 60  
Relaxation\_delay = 2 [s]  
Repetition\_time = 3.04333312 [s]  
Temp\_get = 20 [dC]

COMPOUND 210

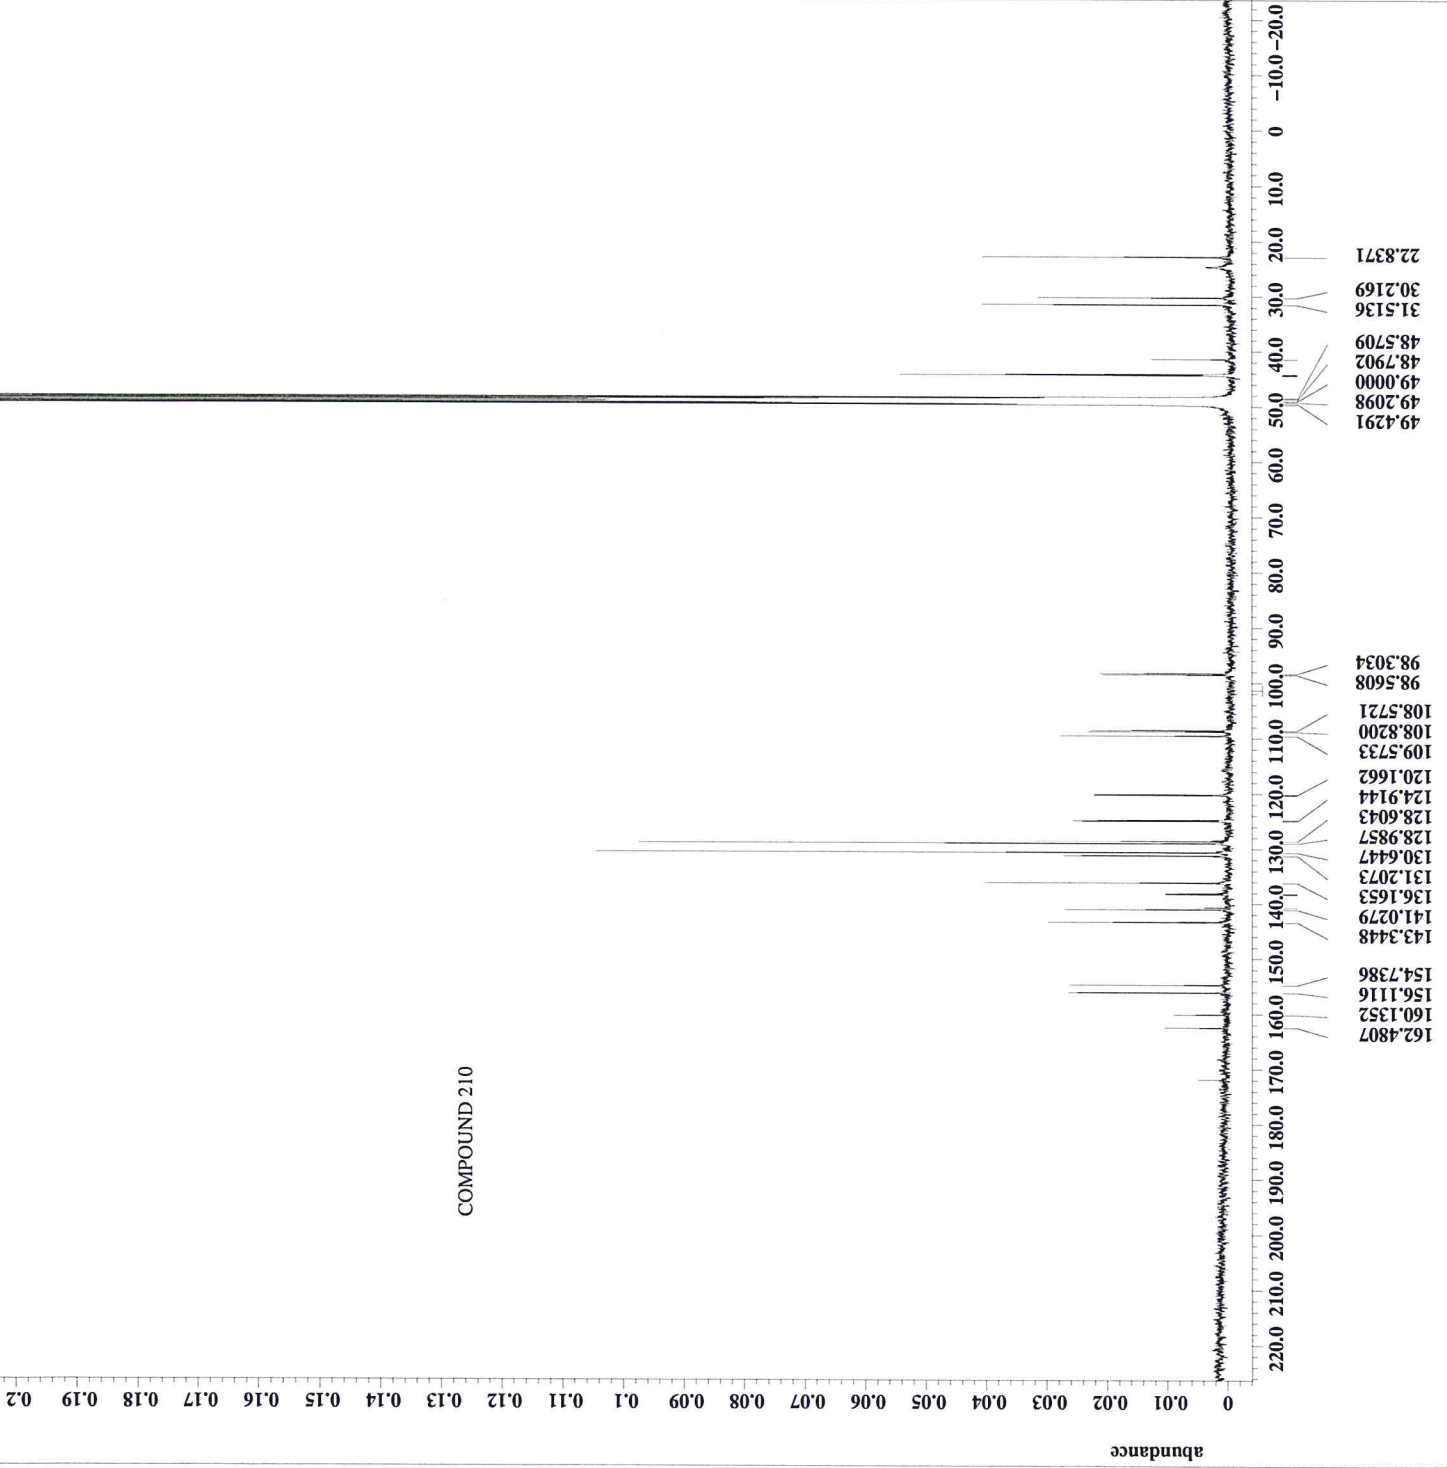

X : parts per Million : 13C

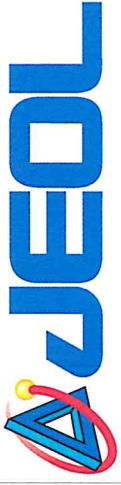

Filename = SK-I-119\_PROTON-7.jdf  
Author = Delta  
Experiment = single\_pulse.ex2  
Sample\_id = SK-I-119  
Solvent = METHANOL-D3  
Creation\_time = 17-APR-2018 18:09:25  
Revision\_time = 18-MAR-2021 08:30:13  
Current\_time = 18-MAR-2021 08:30:17  
Data\_format = 1D COMPLEX  
Dim\_size = 13107  
Dim\_title = 1H  
Dim\_units = [ppm]  
Dimensions = X  
Site = ECS 400  
Spectrometer = JNM-ECS400  
Field\_strength = 9.389766[T] (400[MHz])  
X\_acq\_duration = 2.18365952[s]  
X\_domain = 1H  
X\_freq = 399.78219838[MHz]  
X\_offset = 5[ppm]  
X\_points = 16384  
X\_prescans = 1  
X\_resolution = 0.45794685[Hz]  
X\_sweep = 7.5030012[kHz]  
Irr\_domain = 1H  
Irr\_freq = 399.78219838[MHz]  
Irr\_offset = 5[ppm]  
Tri\_domain = 1H  
Tri\_freq = 399.78219838[MHz]  
Tri\_offset = 5[ppm]  
Clipped = FALSE  
Mod\_return = 1  
Scans = 16  
Total\_scans = 16  
X\_90\_width = 10.65[us]  
X\_acq\_time = 2.18365952[s]  
X\_angle = 45[deg]  
X\_atn = 6[dB]  
X\_pulse = 5.325[us]  
Irr\_mode = Off  
Tri\_mode = Off  
Dante\_preset = FALSE  
Initial\_wait = 1[s]  
Recvr\_gain = 40  
Relaxation\_delay = 4[s]  
Repetition\_time = 6.18365952[s]  
Temp\_get = 18.8[degC]

COMPOUND 211

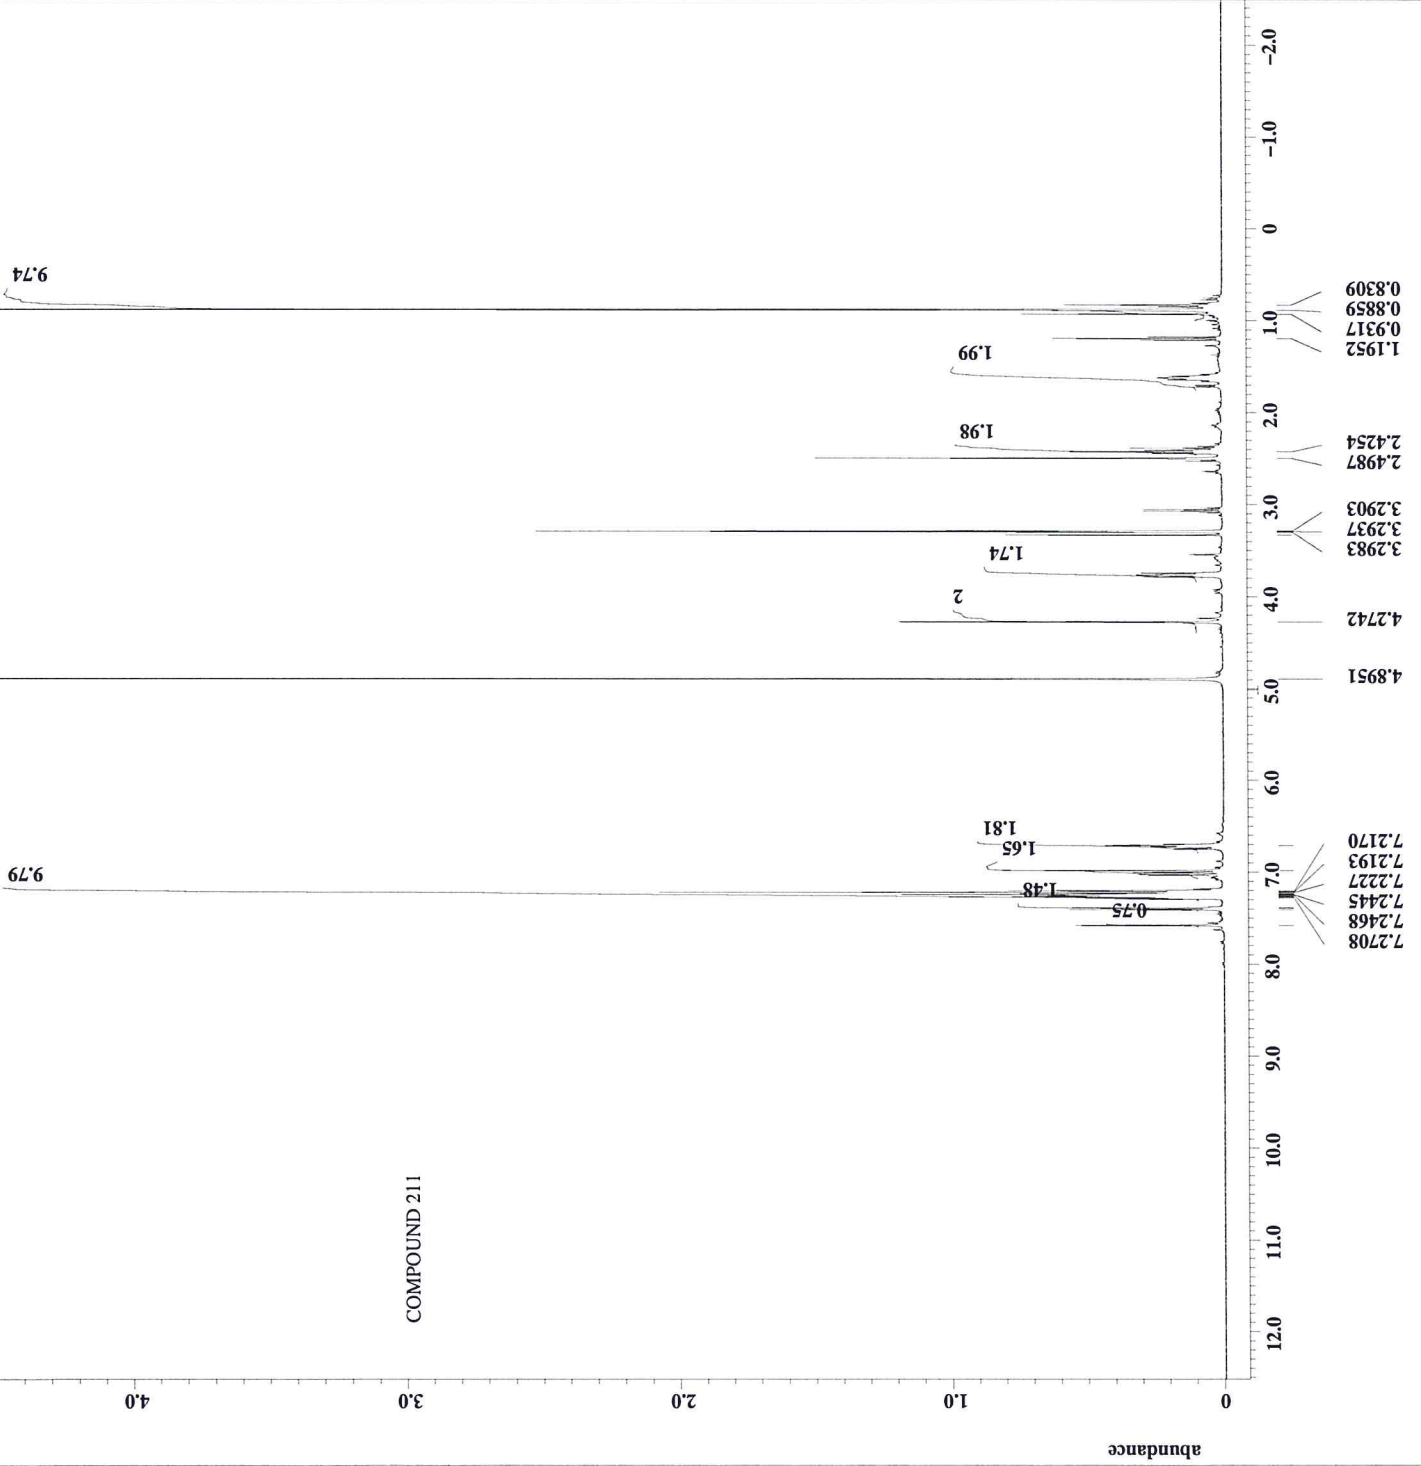

X : parts per Million : 1H



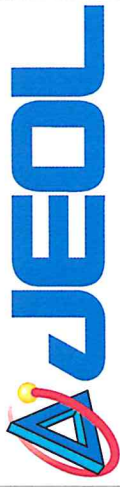

File name = SK-I-119\_CARBON-5.jdf  
Author = Delta  
Experiment = single\_pulse\_dec  
Sample\_id = SK-I-119  
Solvent = METHANOL-D3  
Creation time = 18-APR-2018 06:01:05  
Revision time = 15-MAR-2021 14:51:27  
Current time = 15-MAR-2021 14:51:31  
Data format = 1D COMPLEX  
Dim size = 26214  
Dim title = 13C  
Dim units = [ppm]  
Dimensions = X  
Site = ECS 400  
Spectrometer = JNM-ECS400  
Field strength = 9.389766 [T] (400 [MHz])  
X\_acq\_duration = 1.04333312 [s]  
X\_domain = 13C  
X\_freq = 100.52530333 [MHz]  
X\_offset = 100 [ppm]  
X\_points = 32768  
X\_prescans = 4  
X\_resolution = 0.95846665 [Hz]  
X\_sweep = 31.40703518 [kHz]  
Irr\_domain = 1H  
Irr\_freq = 399.78219838 [MHz]  
Irr\_offset = 5 [ppm]  
Clipped = TRUE  
Mod\_return = 1  
Scans = 14000  
Total\_scans = 14000  
X\_90\_width = 13.22 [us]  
X\_acq\_time = 1.04333312 [s]  
X\_angle = 30 [deg]  
X\_atn = 9 [dB]  
X\_pulse = 4.40666667 [us]  
Irr\_atn\_dec = 27 [dB]  
Irr\_atn\_noe = 27 [dB]  
Irr\_noise = WALTZ  
Decoupling = TRUE  
Initial\_wait = 1 [s]  
Noe = TRUE  
Noe\_time = 2 [s]  
Recvr\_gain = 60  
Relaxation\_delay = 2 [s]  
Repetition\_time = 3.04333312 [s]  
Temp\_get = 19.9 [dC]

COMPOUND 211

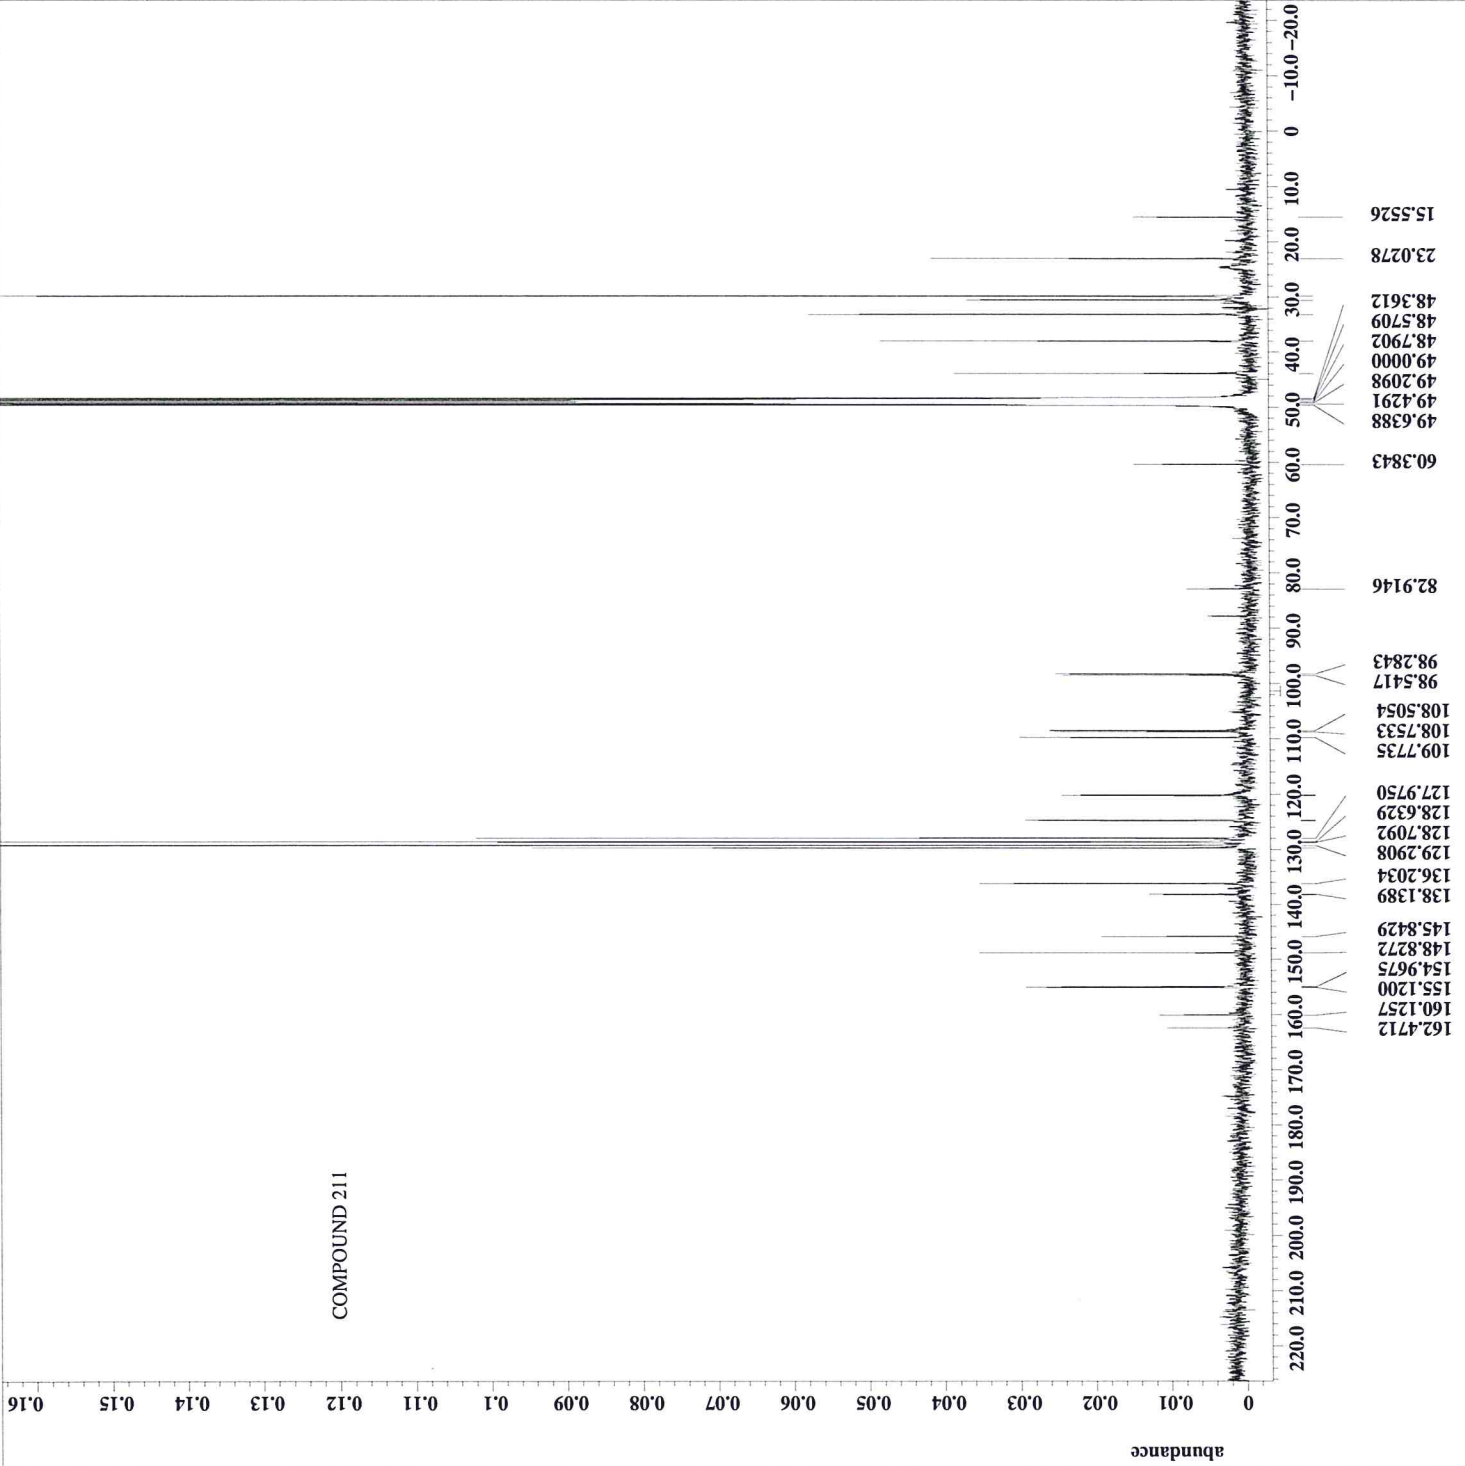

X : parts per Million : 13C

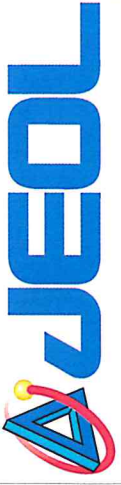

Filename = SK-I-124\_PROTON-5.jdf  
Author = Delta  
Experiment = single\_pulse.ex2  
Sample\_id = SK-I-124  
Solvent = METHANOL-D3  
Creation\_time = 20-APR-2018 14:41:28  
Revision\_time = 15-MAR-2021 14:29:23  
Current\_time = 15-MAR-2021 14:29:28  
Data\_format = 1D COMPLEX  
Dim\_size = 13107  
Dim\_title = 1H  
Dim\_units = [ppm]  
Dimensions = X  
Site = ECS 400  
Spectrometer = JNM-ECS400  
Field\_strength = 9.389766[T] (400 [MHz])  
X\_acq\_duration = 2.18365952[s]  
X\_domain = 1H  
X\_freq = 399.78219838 [MHz]  
X\_offset = 5[ppm]  
X\_points = 16384  
X\_prescans = 1  
X\_resolution = 0.45794685 [Hz]  
X\_sweep = 7.5030012 [kHz]  
Irr\_domain = 1H  
Irr\_freq = 399.78219838 [MHz]  
Irr\_offset = 5[ppm]  
Tri\_domain = 1H  
Tri\_freq = 399.78219838 [MHz]  
Tri\_offset = 5[ppm]  
Clipped = FALSE  
Mod\_return = 1  
Scans = 16  
Total\_scans = 16  
X\_90\_width = 10.65 [us]  
X\_acq\_time = 2.18365952 [s]  
X\_angle = 45 [deg]  
X\_atn = 6 [dB]  
X\_pulse = 5.325 [us]  
Irr\_mode = Off  
Tri\_mode = Off  
Dante\_presat = FALSE  
Initial\_wait = 1 [s]  
Recvr\_gain = 46  
Relaxation\_delay = 4 [s]  
Repetition\_time = 6.18365952 [s]  
Temp\_get = 18.5 [dC]

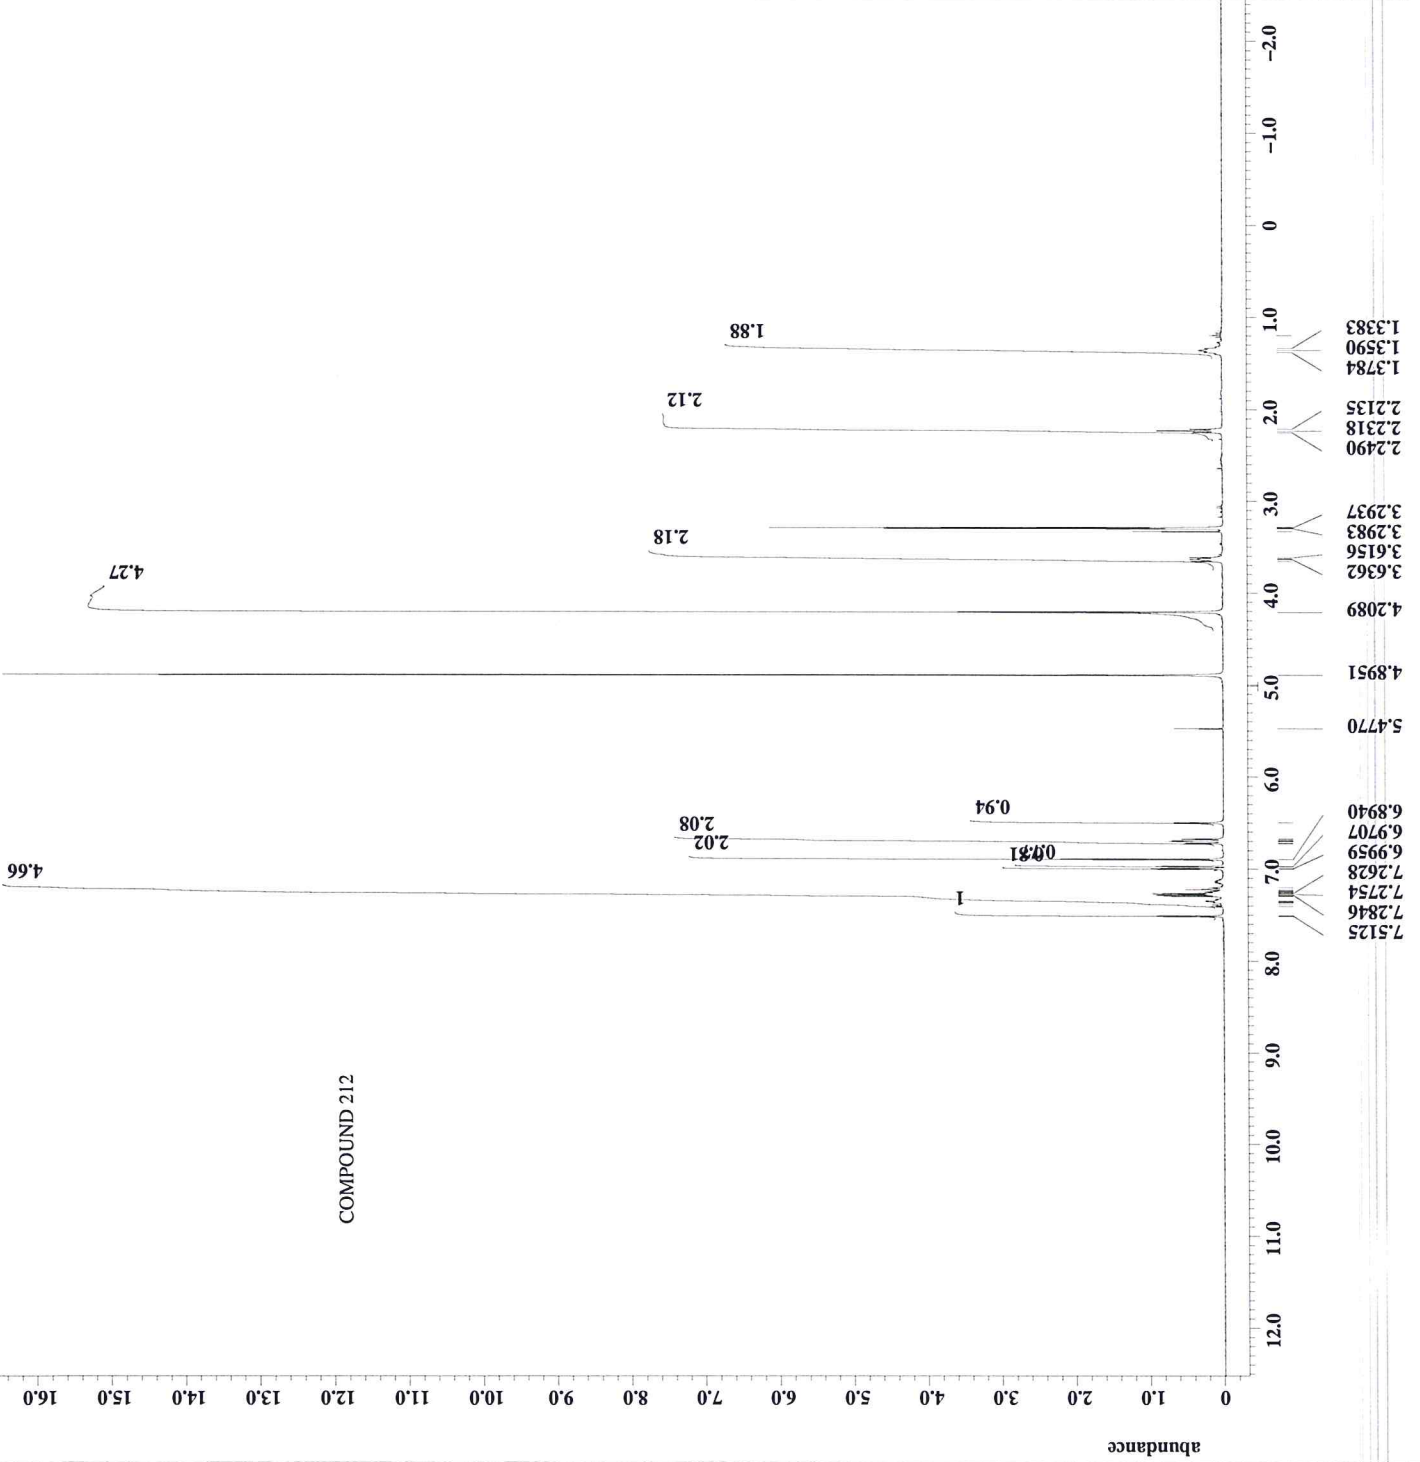

X : parts per Million : 1H

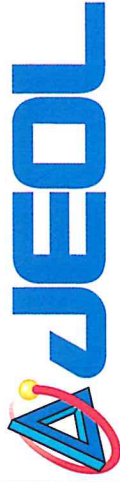

File: SK-I-124\_CARBON-5.jdf  
Author: Delta  
Experiment: single\_pulse\_dec  
Sample\_id: SK-I-124  
Solvent: METHANOL-D3  
Creation\_time: 23-APR-2018 08:35:05  
Revision\_time: 15-MAR-2021 14:34:28  
Current\_time: 15-MAR-2021 14:34:37

Data\_format: 1D COMPLEX  
Dim\_size: 26214  
Dim\_title: 13C  
Dim\_units: [ppm]  
Dimensions: X  
Site: ECS 400  
Spectrometer: JNM-ECS400

Field\_strength: 9.389766 [T] (400 [MHz])  
X\_acq\_duration: 1.04333312 [s]  
X\_domain: 13C  
X\_freq: 100.52530333 [MHz]  
X\_offset: 100 [ppm]  
X\_points: 32768  
X\_prescans: 4  
X\_resolution: 0.95846665 [Hz]  
X\_sweep: 31.40703518 [kHz]  
Irr\_domain: 1H  
Irr\_freq: 399.78219838 [MHz]  
Irr\_offset: 5 [ppm]  
Clipped: TRUE  
Mod\_return: 1  
Scans: 77883  
Total\_scans: 77883

X\_90\_width: 13.22 [us]  
X\_acq\_time: 1.04333312 [s]  
X\_angle: 30 [deg]  
X\_atn: 9 [dB]  
X\_pulse: 4.40666667 [us]  
Irr\_atn\_dec: 27 [dB]  
Irr\_atn\_noe: 27 [dB]  
Irr\_noise: WALTZ  
Decoupling: TRUE  
Initial\_wait: 1 [s]  
Noe: TRUE  
Noe\_time: 2 [s]  
Recvr\_gain: 60  
Relaxation\_delay: 2 [s]  
Repetition\_time: 3.04333312 [s]  
Temp\_get: 19.9 [DC]

COMPOUND 212

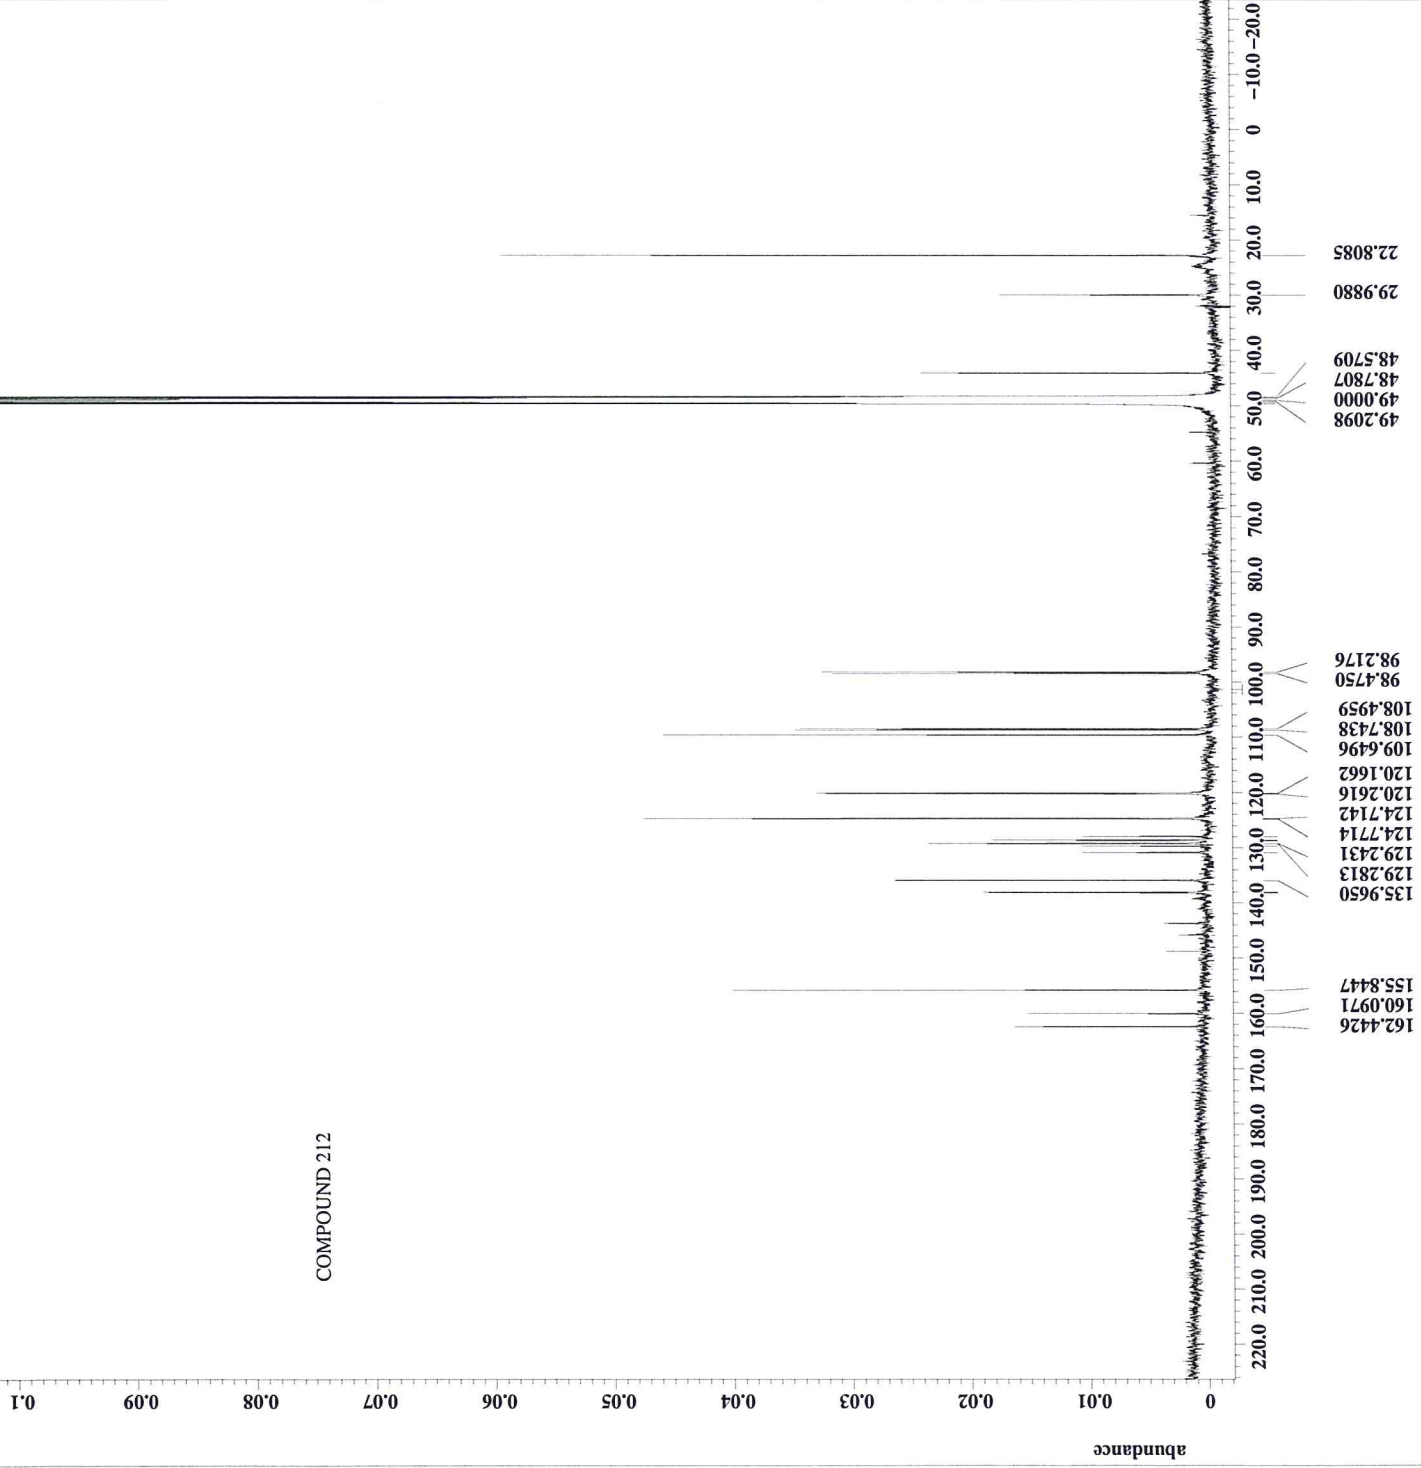

X : parts per Million : 13C

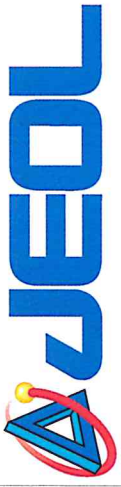

File name = BN-VII-128-4.jdf  
Author = mcrider  
Experiment = single\_pulse.ex2  
Sample\_id = S#341562  
Solvent = METHANOL-D3  
Creation\_time = 19-MAR-2021 06:18:30  
Revision\_time = 19-MAR-2021 09:45:10  
Current\_time = 19-MAR-2021 09:45:14  
Comment = single\_pulse  
Data\_format = 1D COMPLEX  
Dim\_size = 13107  
Dim\_title = 1H  
Dim\_units = [ppm]  
Dimensions = X  
Site = ECS 400  
Spectrometer = JNM-ECS400  
Field\_strength = 9.389766[T] (400[MHz])  
X\_acq\_duration = 2.18365952[s]  
X\_domain = 1H  
X\_freq = 399.78219838[MHz]  
X\_offset = 5[ppm]  
X\_points = 16384  
X\_prescans = 1  
X\_resolution = 0.45794685[Hz]  
X\_sweep = 7.5030012[KHz]  
Irr\_domain = 1H  
Irr\_freq = 399.78219838[MHz]  
Irr\_offset = 5[ppm]  
Tri\_domain = 1H  
Tri\_freq = 399.78219838[MHz]  
Tri\_offset = 5[ppm]  
Clipped = FALSE  
Mod\_return = 1  
Scans = 8  
Total\_scans = 8  
X\_90\_width = 13.15[us]  
X\_acq\_time = 2.18365952[s]  
X\_angle = 45[deg]  
X\_atn = 6[dB]  
X\_pulse = 6.575[us]  
Irr\_mode = Off  
Tri\_mode = Off  
Dante\_preset = FALSE  
Initial\_wait = 1[s]  
Recvr\_gain = 50  
Relaxation\_delay = 5[s]  
Repetition\_time = 7.18365952[s]  
Temp\_get = 18.5[dc]

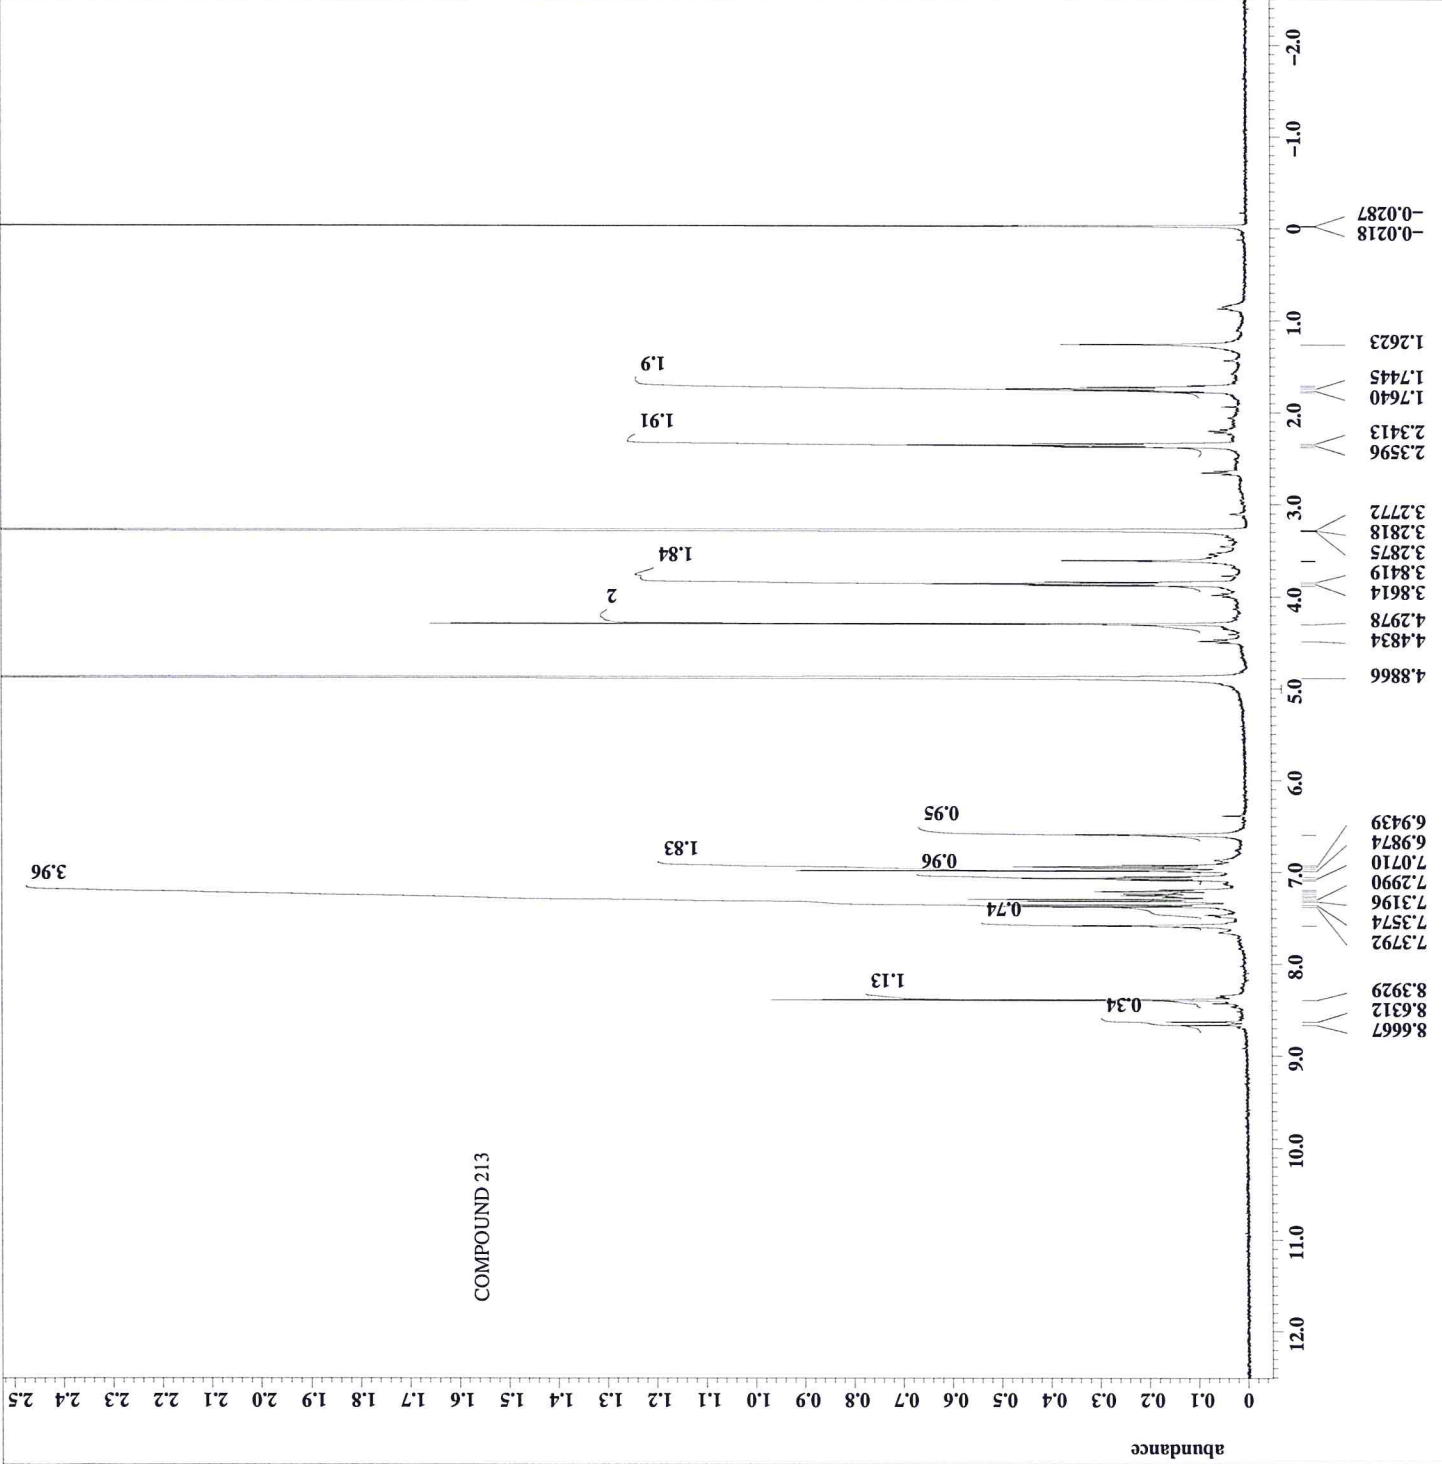

X : parts per Million : 1H



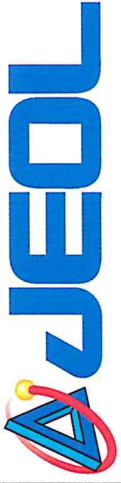

Filename = EN-VII-128-2\_CARBON-5  
Author = mcrider  
Experiment = single\_pulse\_dec  
Sample\_id = BN-VII-128-2  
Solvent = METHANOL-D3  
Creation\_time = 20-MAR-2021 20:54:04  
Revision\_time = 22-MAR-2021 08:14:30  
Current\_time = 22-MAR-2021 08:14:41  
Data\_format = ID COMPLEX  
Dim\_size = 26214  
Dim\_title = 13C  
Dim\_units = [ppm]  
Dimensions = X  
Site = ECS 400  
Spectrometer = JNM-ECS400  
Field\_strength = 9.389766[T] (400 [MHz])  
X\_acq\_duration = 1.04333312[s]  
X\_domain = 13C  
X\_freq = 100.52530333 [MHz]  
X\_offset = 100 [ppm]  
X\_points = 32768  
X\_prescans = 4  
X\_resolution = 0.95846665 [Hz]  
X\_sweep = 31.40703518 [kHz]  
Irr\_domain = 1H  
Irr\_freq = 399.78219838 [MHz]  
Irr\_offset = 5 [ppm]  
Clipped = TRUE  
Mod\_return = 1  
Scans = 40000  
Total\_scans = 40000  
X\_90\_width = 10.35 [us]  
X\_acq\_time = 1.04333312 [s]  
X\_angle = 30 [deg]  
X\_atn = 10.6 [dB]  
X\_pulse = 3.45 [us]  
Irr\_atn\_dec = 25 [dB]  
Irr\_atn\_noe = 25 [dB]  
Irr\_noise = WALTZ  
Decoupling = TRUE  
Initial\_wait = 1 [s]  
Noe\_time = TRUE  
Noe\_wait = 2 [s]  
Recvr\_gain = 60  
Relaxation\_delay = 2 [s]  
Repetition\_time = 3.04333312 [s]  
Temp\_get = 18.3 [dC]

COMPOUND 213

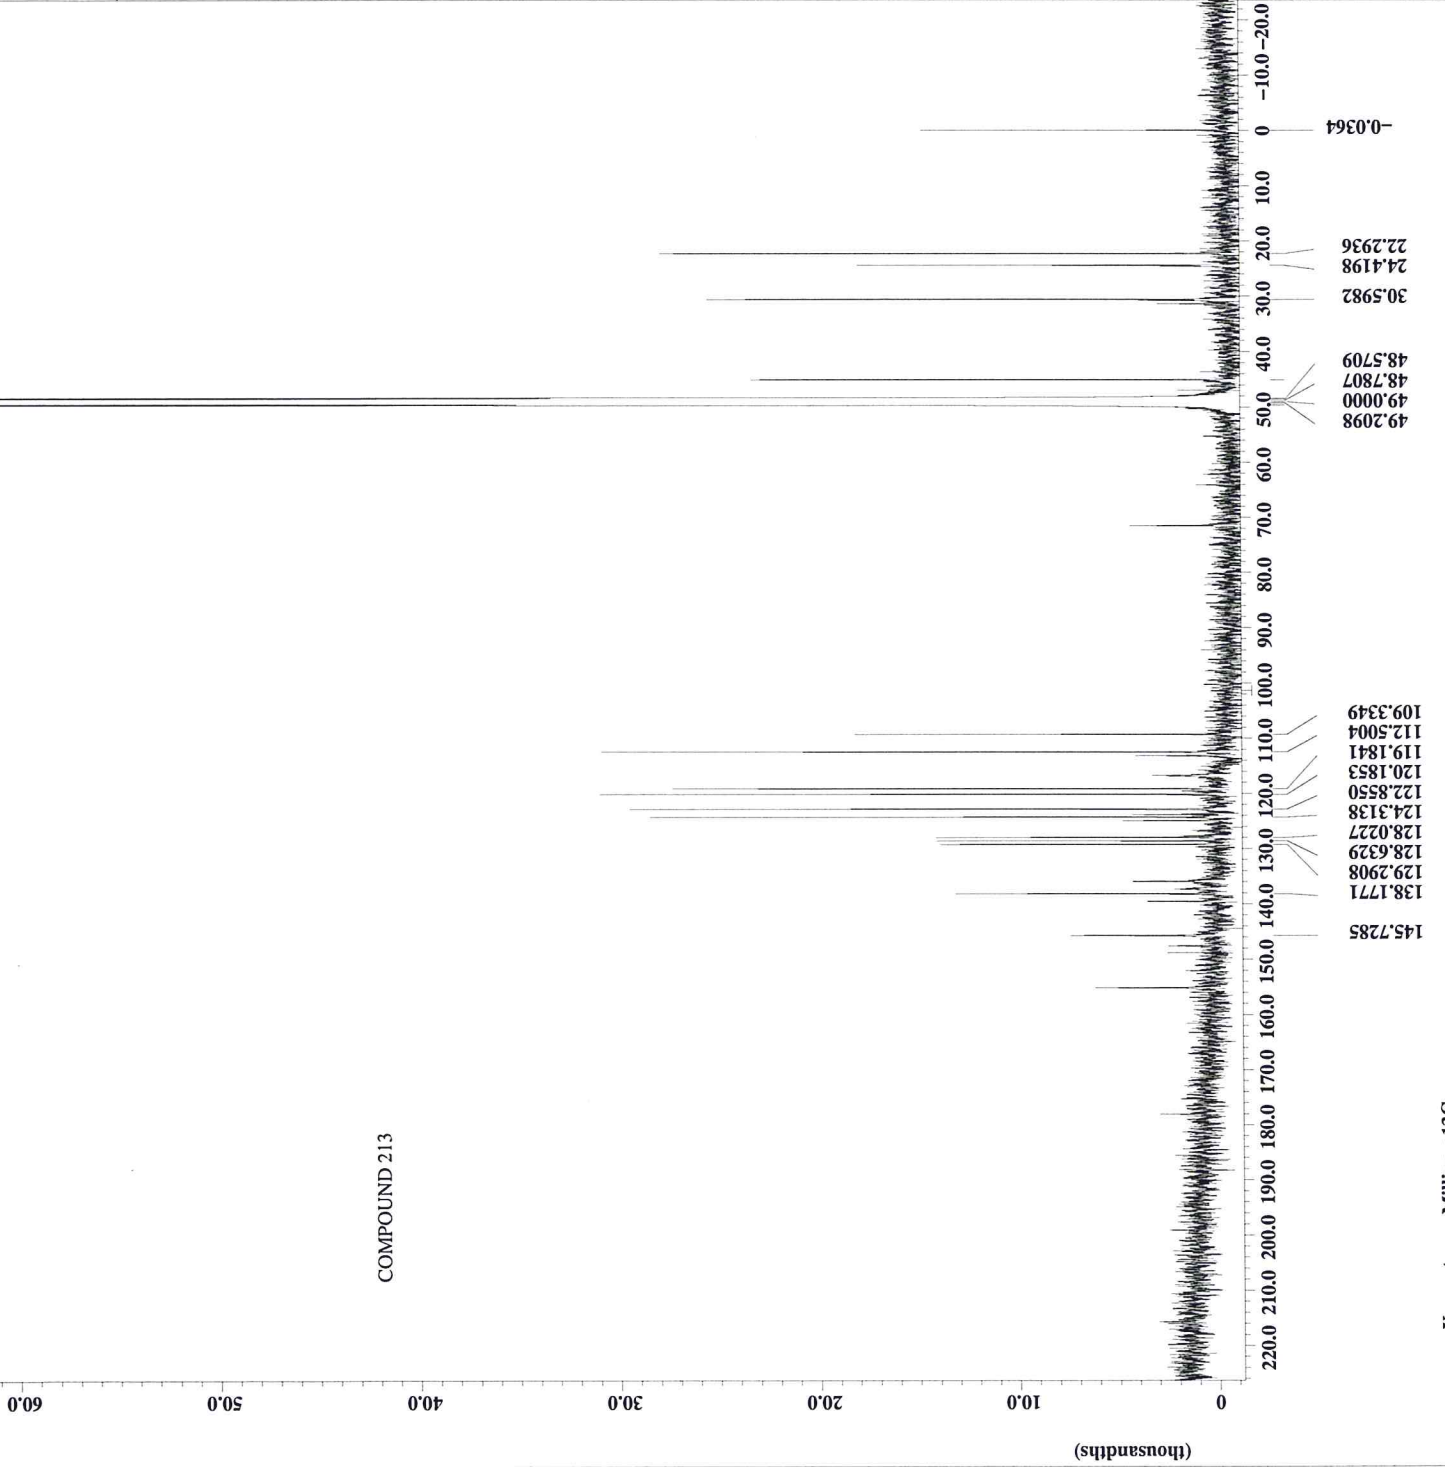

X : parts per Million : 13C

Compound 214

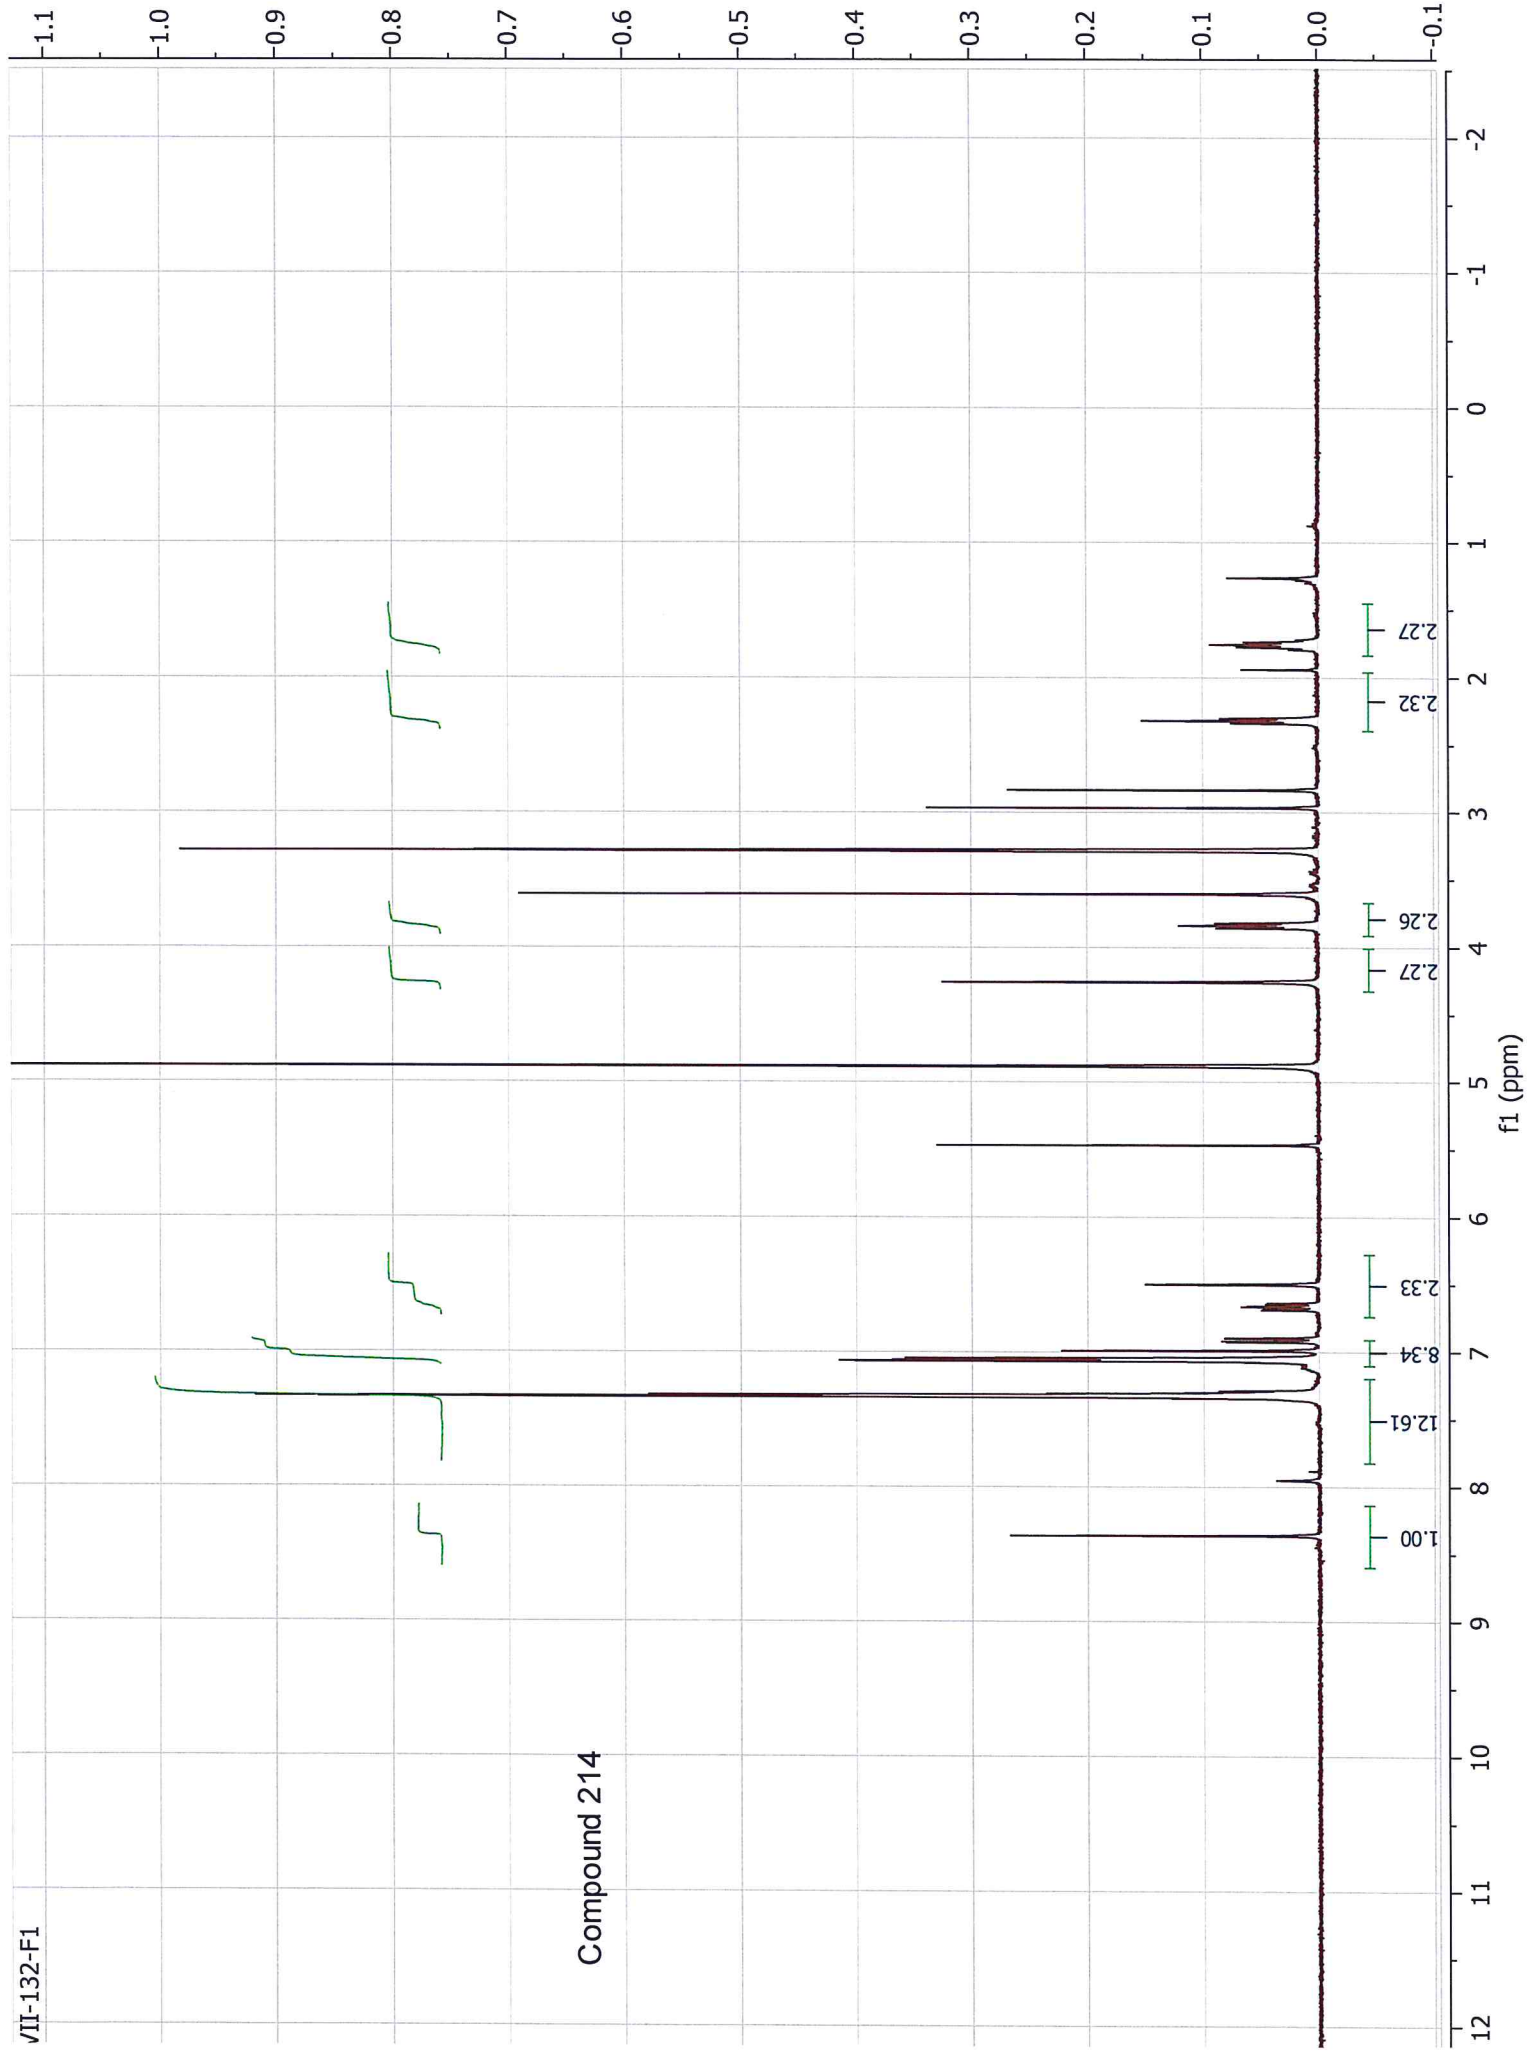

Compound 214

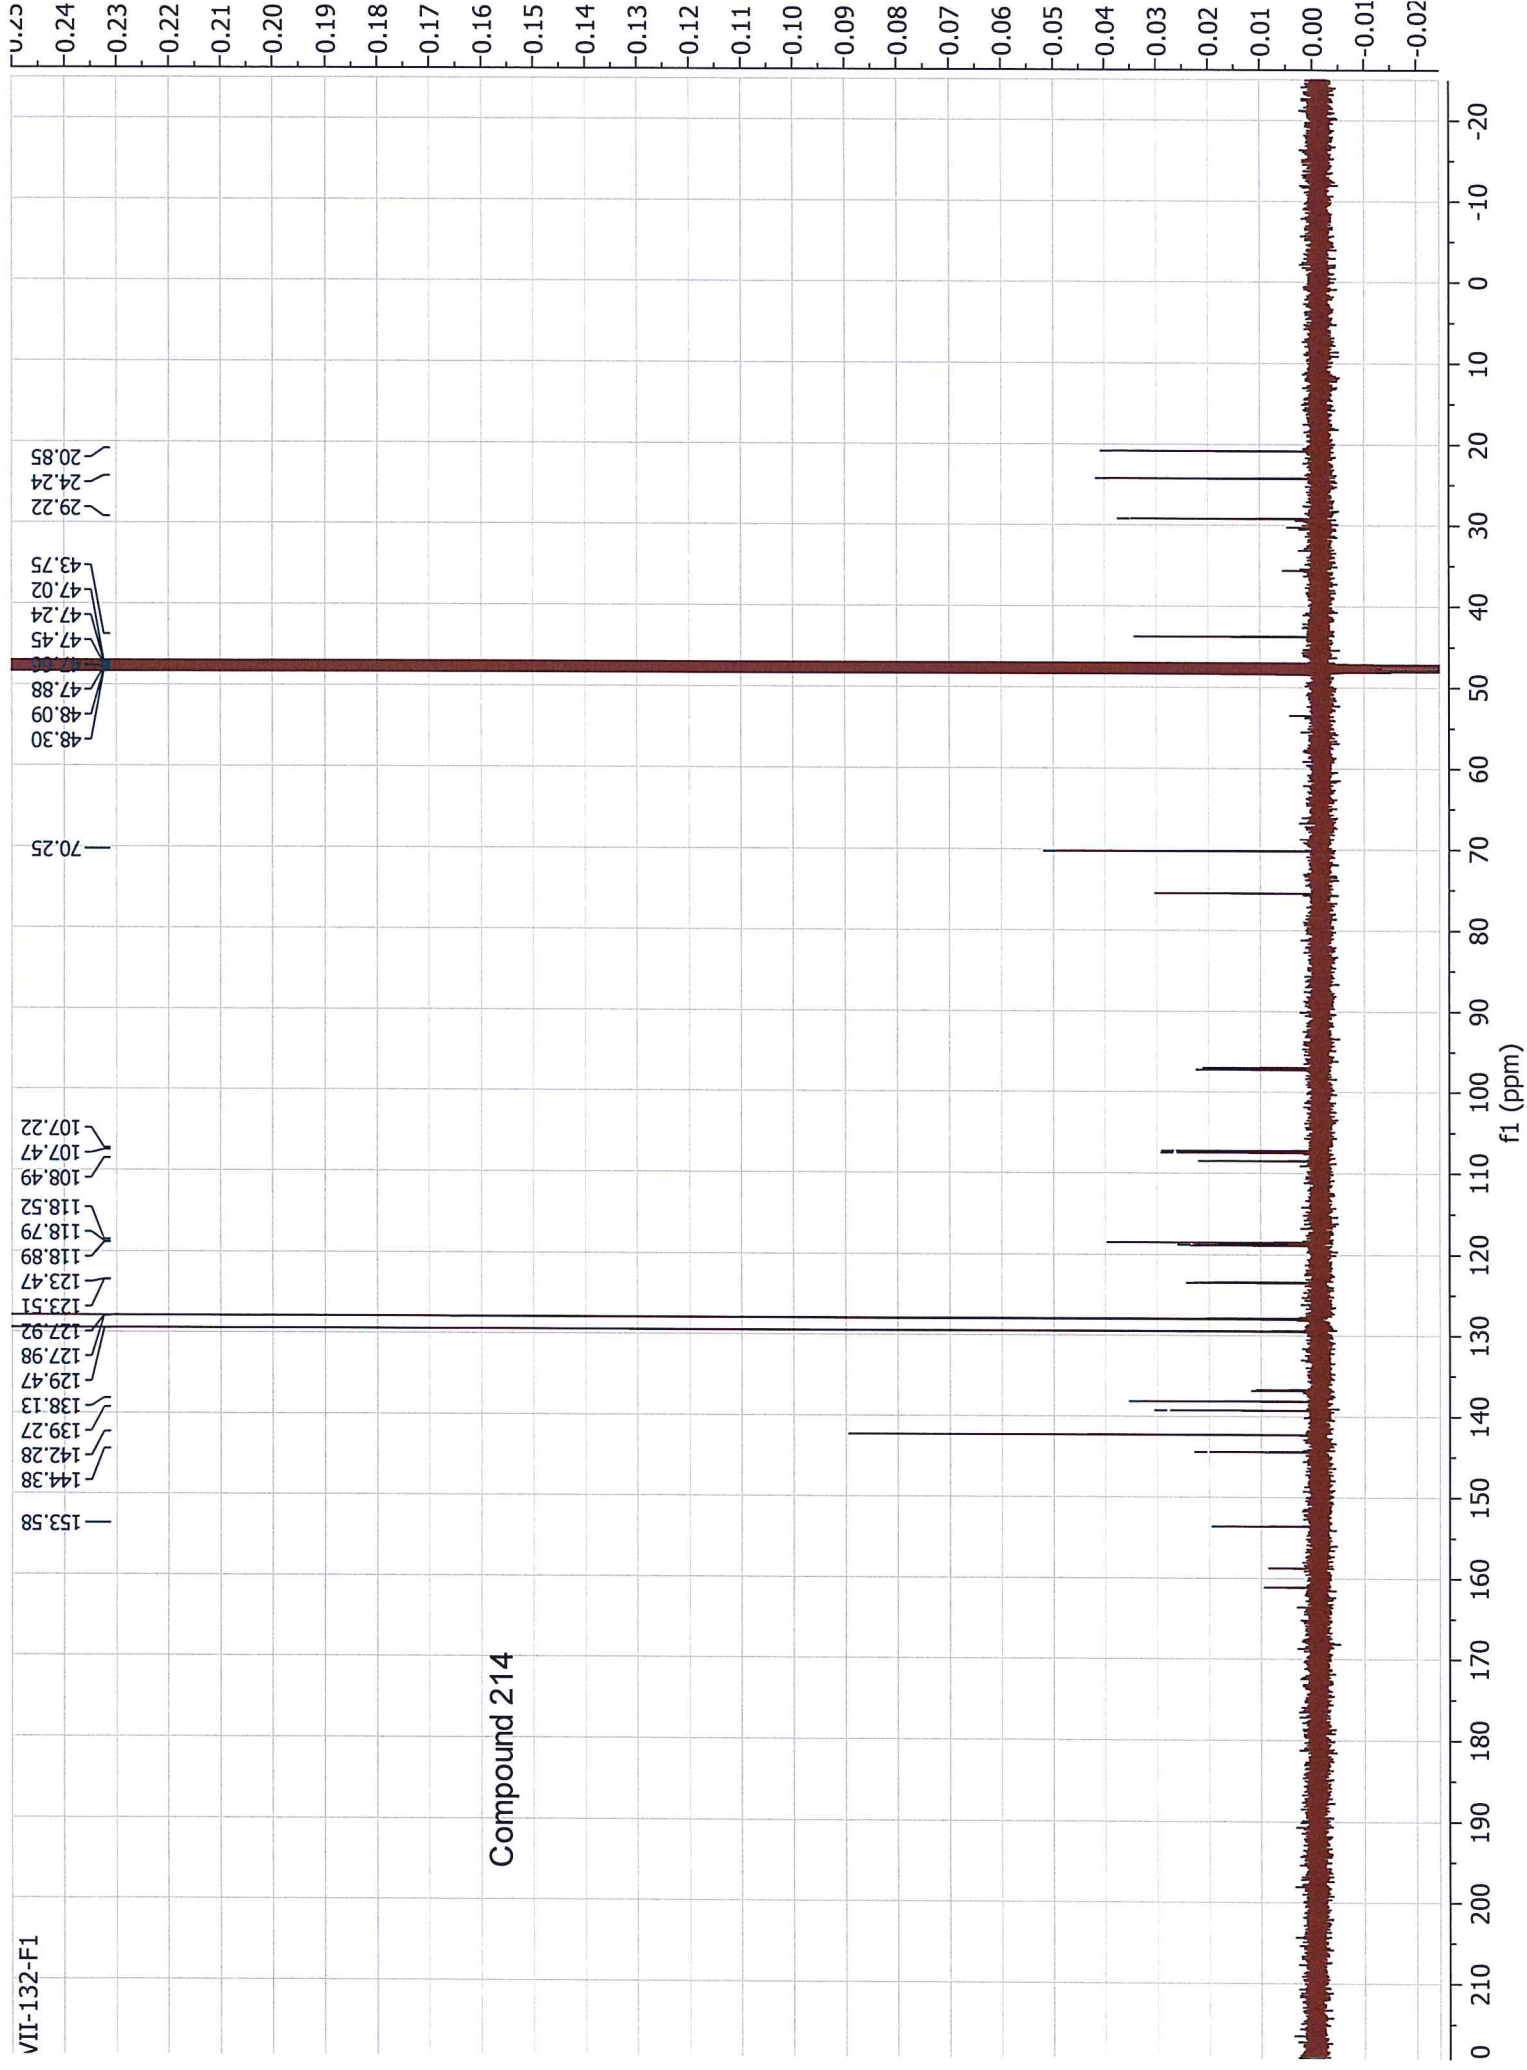

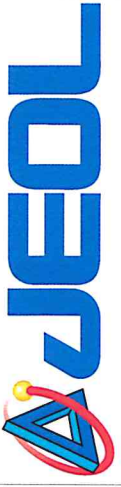

COMPOUND 218

Filename = BN-VI-34-F1\_PROTON-3.  
Author = Neumann  
Experiment = single\_pulse.ex2  
Sample\_id = BN-VI-34-F1  
Solvent = DMSO-D6  
Creation\_time = 31-AUG-2015 08:14:21  
Revision\_time = 10-MAR-2021 10:50:25  
Current\_time = 10-MAR-2021 10:50:32  
Data\_format = 1D COMPLEX  
Dim\_size = 13107  
Dim\_title = 1H  
Dim\_units = [ppm]  
Dimensions = X  
Site = ECS 400  
Spectrometer = JNM-ECS400  
Field\_strength = 9.389766[T] (400[MHz])  
X\_acq\_duration = 2.18365952[s]  
X\_domain = 1H  
X\_freq = 399.78219838[MHz]  
X\_offset = 5[ppm]  
X\_points = 16384  
X\_prescans = 1  
X\_resolution = 0.45794685[Hz]  
X\_sweep = 7.5030012[kHz]  
Irr\_domain = 1H  
Irr\_freq = 399.78219838[MHz]  
Irr\_offset = 5[ppm]  
Irr\_domain = 1H  
Tri\_freq = 399.78219838[MHz]  
Tri\_offset = 5[ppm]  
Clipped = FALSE  
Mod\_return = 1  
Scans = 16  
Total\_scans = 16  
X\_90\_width = 10.58[us]  
X\_acq\_time = 2.18365952[s]  
X\_angle = 45[deg]  
X\_atn = 6[db]  
X\_pulse = 5.29[us]  
Irr\_mode = Off  
Tri\_mode = Off  
Dante\_presat = FALSE  
Initial\_wait = 1[s]  
Recvr\_gain = 32  
Relaxation\_delay = 4[s]  
Repetition\_time = 6.18365952[s]  
Temp\_get = 20.4[degC]

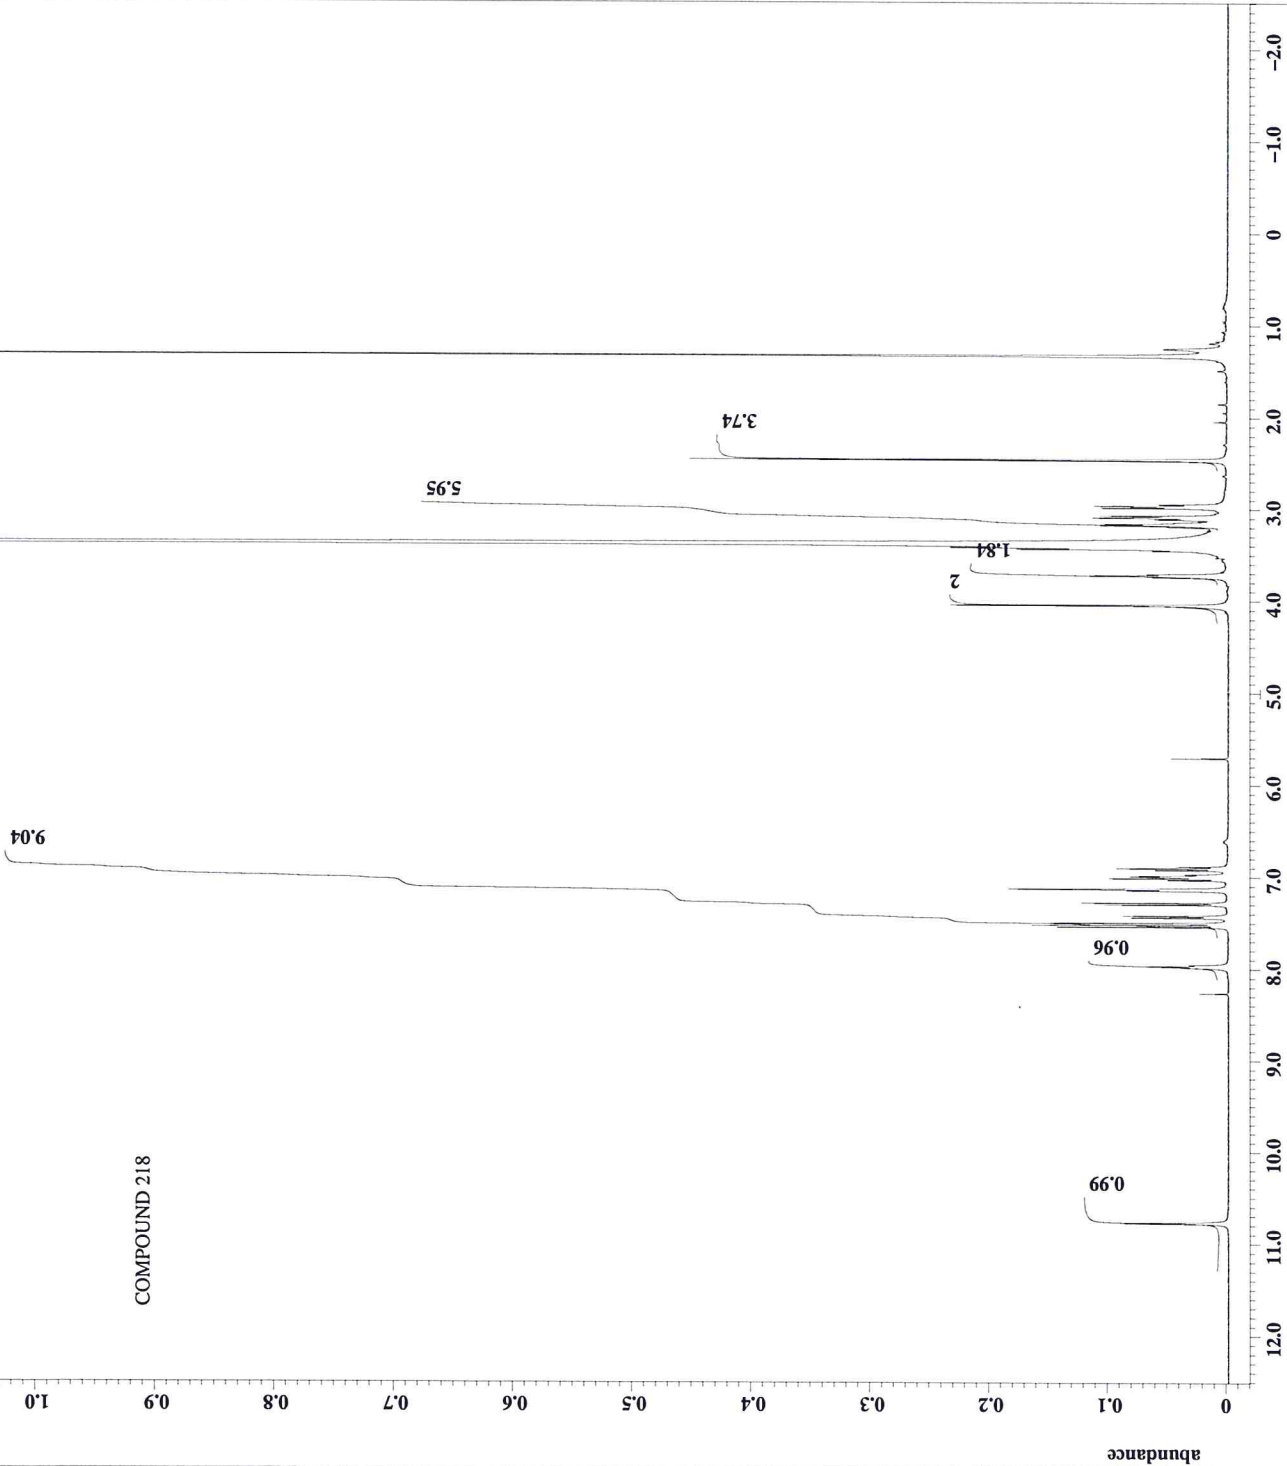

X : parts per Million : 1H



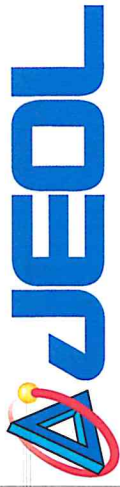

File name = BN-VI-32-c-2\_CARBON-3  
Author = Neumann  
Experiment = single\_pulse\_dec  
Sample\_id = BN-VI-32-c-2  
Solvent = METHANOL-D3  
Creation\_time = 4-AUG-2015 16:20:23  
Revision\_time = 10-MAR-2021 10:22:44  
Current\_time = 10-MAR-2021 10:23:34  
Data\_format = 1D COMPLEX  
Dim\_size = 26214  
Dim\_title = 13C  
Dim\_units = [ppm]  
Dimensions = X  
Site = ECS 400  
Spectrometer = JNM-ECS400  
Field\_strength = 9.389766 [T] (400 [MHz])  
X\_acq\_duration = 1.04333312 [s]  
X\_domain = 13C  
X\_freq = 100.52530333 [MHz]  
X\_offset = 100 [ppm]  
X\_points = 32768  
X\_prescans = 4  
X\_resolution = 0.95846665 [Hz]  
X\_sweep = 31.40703518 [kHz]  
Irr\_domain = 1H  
Irr\_freq = 399.78219838 [MHz]  
Irr\_offset = 5 [ppm]  
Clipped = FALSE  
Mod\_return = 1  
Scans = 1345  
Total\_scans = 1345  
X\_90\_width = 12.36 [us]  
X\_acq\_time = 1.04333312 [s]  
X\_angle = 30 [deg]  
X\_atn = 9 [dB]  
X\_pulse = 4.12 [us]  
Irr\_atn\_dec = 27 [dB]  
Irr\_atn\_noe = 27 [dB]  
Irr\_noise = WALTZ  
Decoupling = TRUE  
Initial\_wait = 1 [s]  
Noe = TRUE  
Noe\_time = 3 [s]  
Recvr\_gain = 60  
Relaxation\_delay = 3 [s]  
Repetition\_time = 4.04333312 [s]  
Temp\_get = 20.6 [dC]

COMPOUND 218

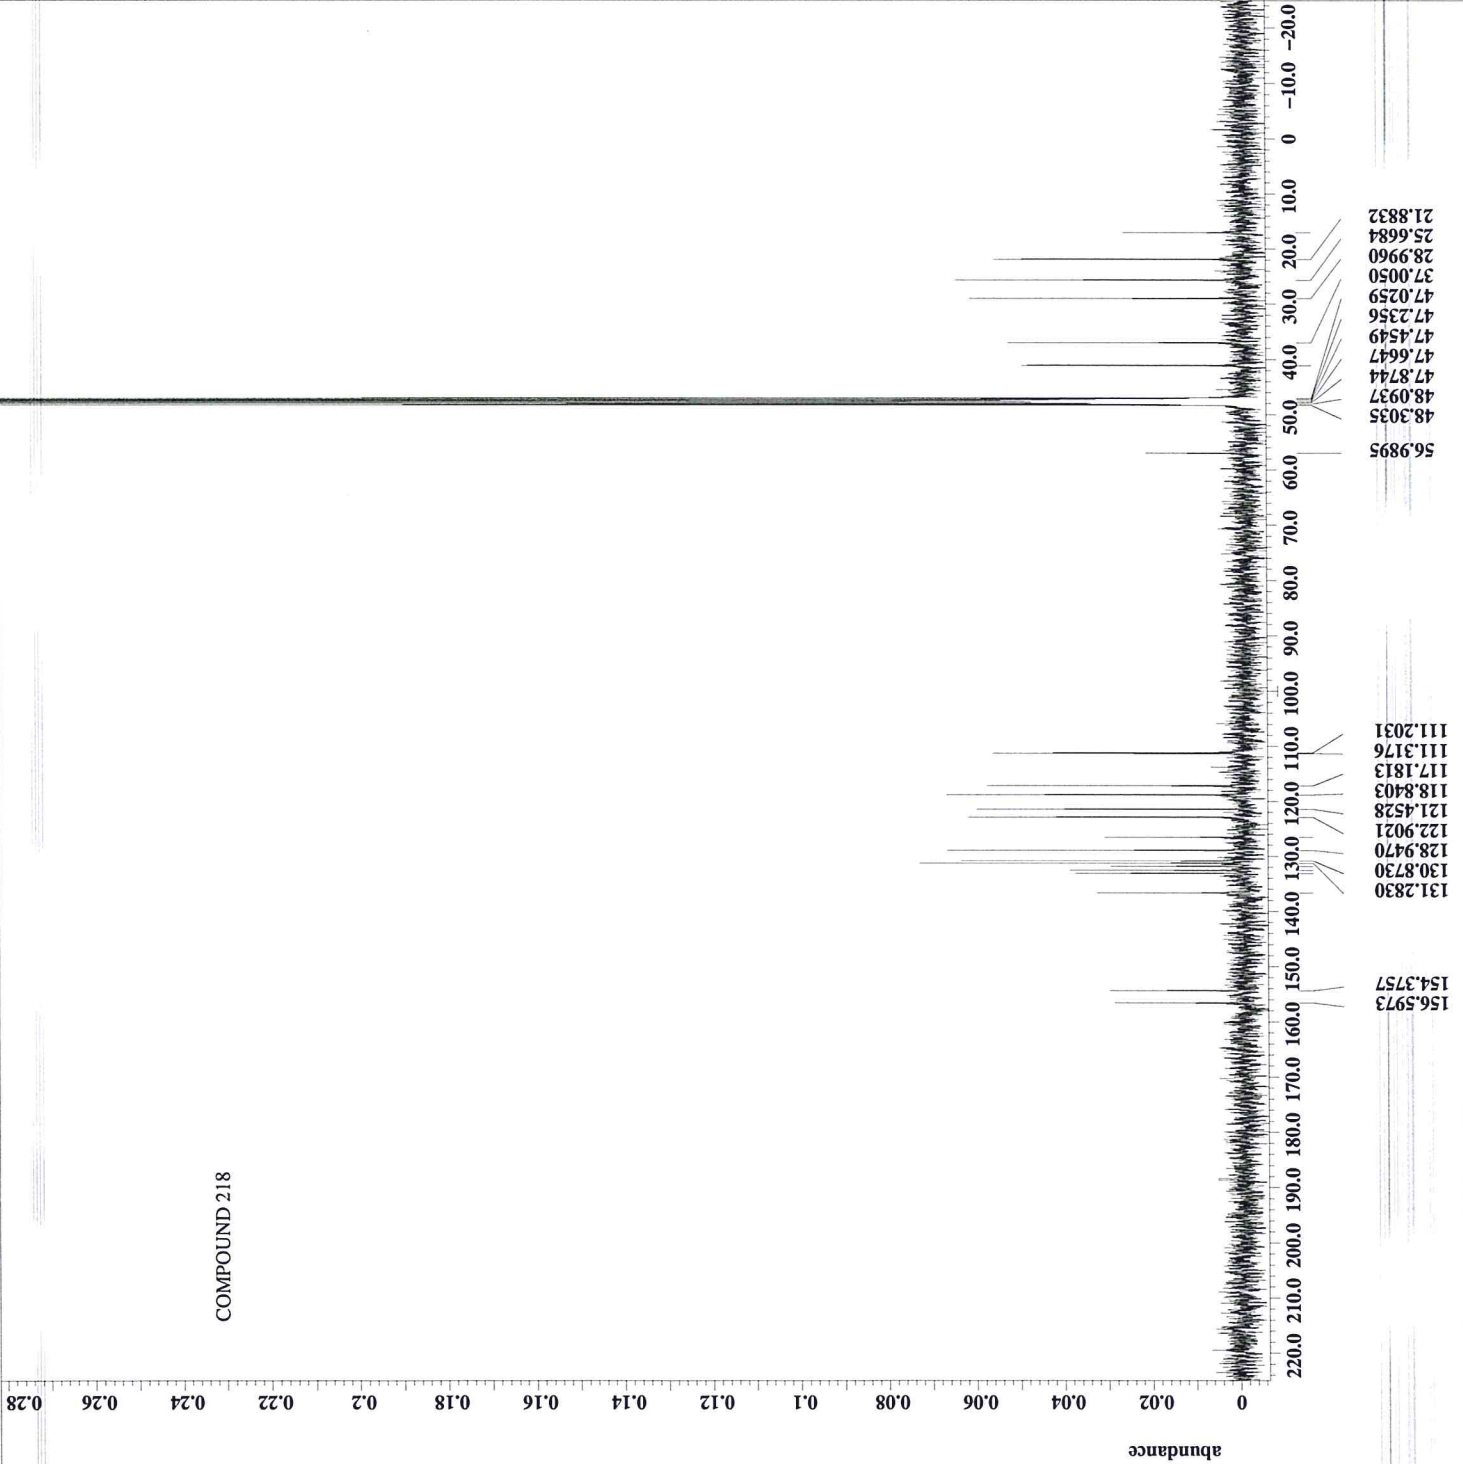

X : parts per Million : 13C

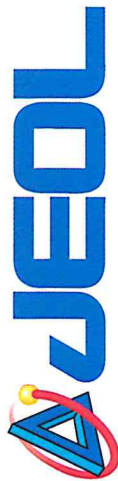

COMPOUND 219

Filename = BN-VI-26-c\_PROTON-3.j  
Author = Neumann  
Experiment = single\_pulse.ex2  
Sample\_id = BN-VI-26-c  
Solvent = CHLOROFORM-D  
Creation\_time = 23-JUL-2015 13:15:39  
Revision\_time = 10-MAR-2021 11:01:57  
Current\_time = 10-MAR-2021 11:02:01

Data\_format = 1D COMPLEX  
Dim\_size = 13107  
Dim\_title = 1H  
Dim\_units = [ppm]  
Dimensions = X  
Site = ECS 400  
Spectrometer = JNM-ECS400

Field\_strength = 9.389766[T] (400[MHz])  
X\_acq\_duration = 2.18365952[s]  
X\_domain = 1H  
X\_freq = 399.78219838[MHz]  
X\_offset = 5[ppm]  
X\_points = 16384  
X\_prescans = 1  
X\_resolution = 0.45794685[Hz]  
X\_sweep = 7.5030012[kHz]  
Irr\_domain = 1H  
Irr\_freq = 399.78219838[MHz]  
Irr\_offset = 5[ppm]  
Tri\_domain = 1H  
Tri\_freq = 399.78219838[MHz]  
Tri\_offset = 5[ppm]  
Clipped = FALSE  
Mod\_return = 1  
Scans = 16  
Total\_scans = 16

X\_90\_width = 10.16[us]  
X\_acq\_time = 2.18365952[s]  
X\_angle = 45[deg]  
X\_atn = 6[db]  
X\_pulse = 5.08[us]  
Irr\_mode = Off  
Tri\_mode = Off  
Pante\_presat = FALSE  
Initial\_wait = 1[s]  
Recvr\_gain = 38  
Relaxation\_delay = 4[s]  
Repetition\_time = 6.18365952[s]  
Temp\_get = 20.3[dc]

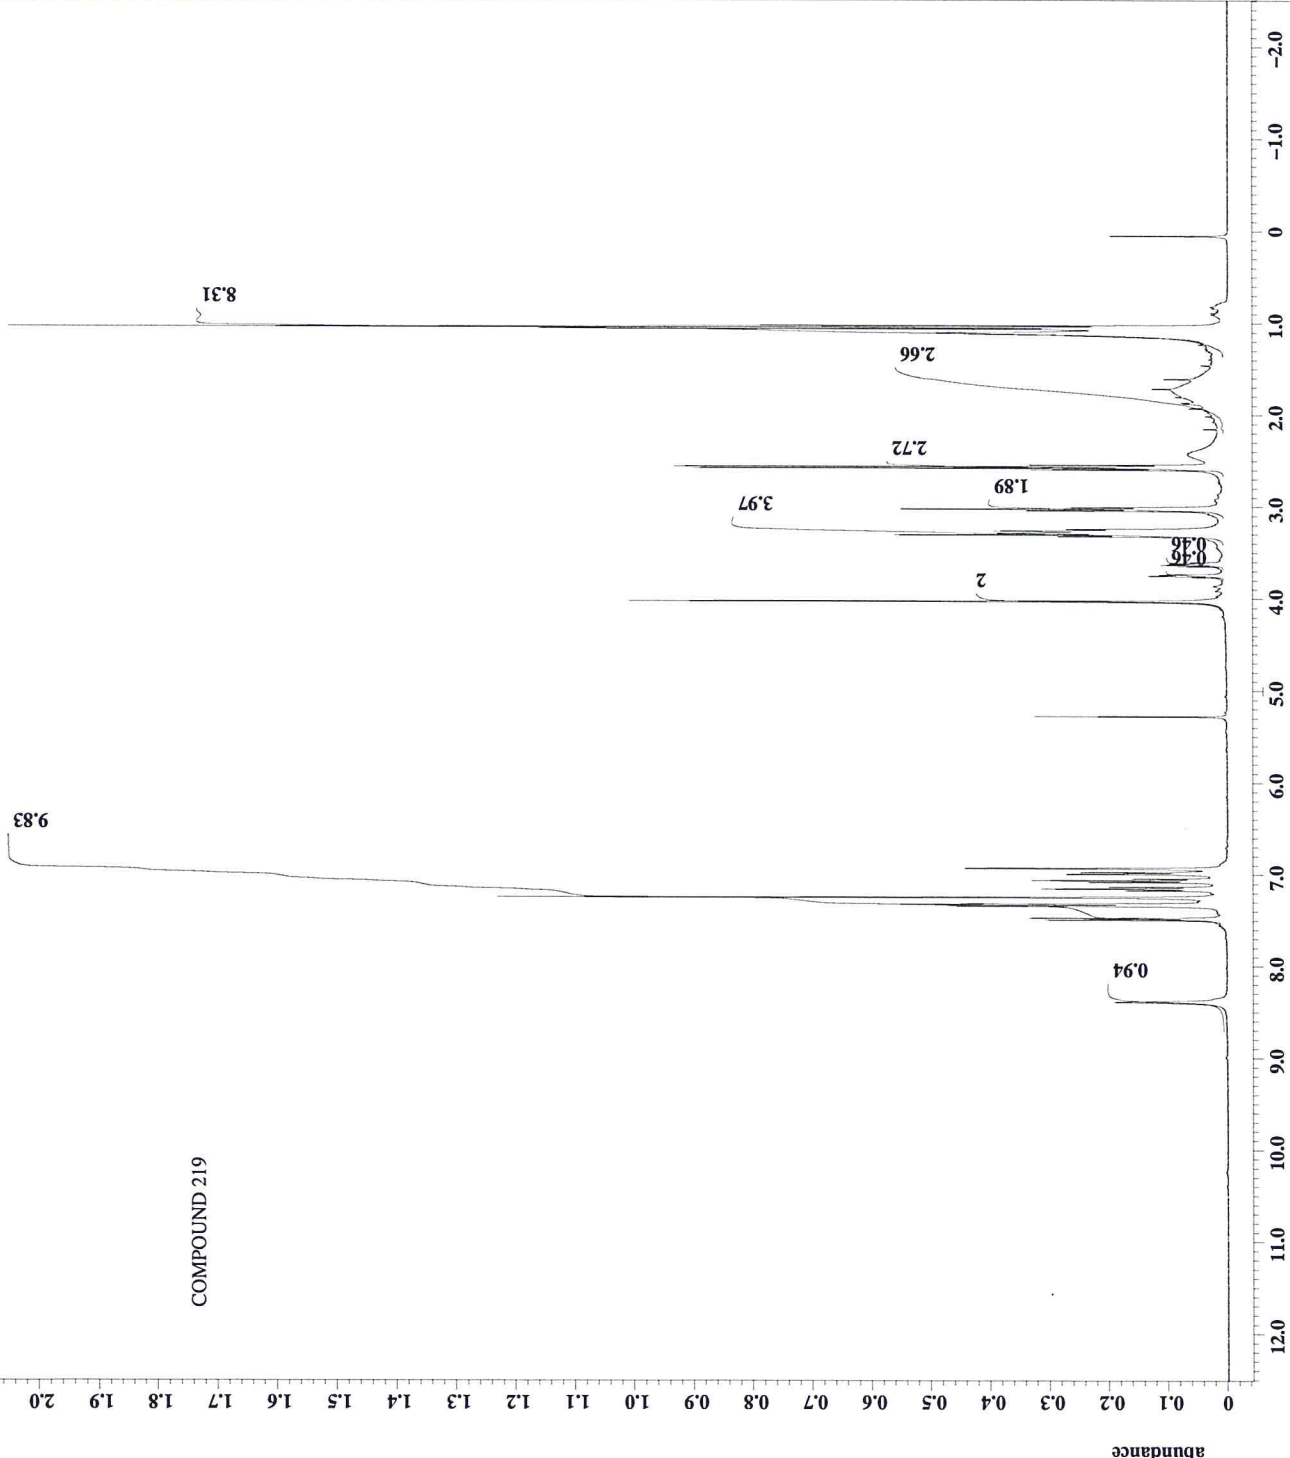

X : parts per Million : 1H

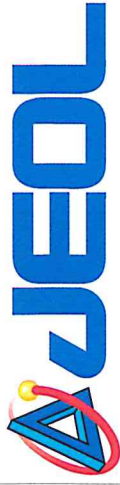

COMPOUND 219

Filename = BN-VI-26-C\_CARBON-4.j  
Author = Neumann  
Experiment = single\_pulse\_dec  
Sample\_id = BN-VI-26-c  
Solvent = CHLOROFORM-D  
Creation\_time = 23-JUL-2015 14:59:09  
Revision\_time = 10-MAR-2021 11:03:03  
Current\_time = 10-MAR-2021 11:03:23

Data\_format = 1D COMPLEX  
Dim\_size = 26214  
Dim\_title = 13C  
Dim\_units = [ppm]  
Dimensions = X  
Site = ECS 400  
Spectrometer = JNM-ECS400

Field\_strength = 9.389766 [T] (400 [MHz])  
X\_acq\_duration = 1.04333312 [s]  
X\_domain = 13C  
X\_freq = 100.52530333 [MHz]  
X\_offset = 100 [ppm]  
X\_points = 32768  
X\_prescans = 4  
X\_resolution = 0.95846665 [Hz]  
X\_sweep = 31.40703518 [kHz]  
Irr\_domain = 1H  
Irr\_freq = 399.78219838 [MHz]  
Irr\_offset = 5 [ppm]  
Clipped = TRUE  
Mod\_return = 1  
Scans = 1201  
Total\_scans = 1201

X\_90\_width = 12.36 [us]  
X\_acq\_time = 1.04333312 [s]  
X\_angle = 30 [deg]  
X\_atn = 9 [dB]  
X\_pulse = 4.12 [us]  
Irr\_atn\_dec = 27 [dB]  
Irr\_atn\_noe = 27 [dB]  
Decoupling = WALTZ  
Initial\_wait = 1 [s]  
Noe\_time = TRUE  
Noe\_time = 4 [s]  
Recvr\_gain = 60  
Relaxation\_delay = 4 [s]  
Repetition\_time = 5.04333312 [s]  
Temp\_get = 20.5 [dC]

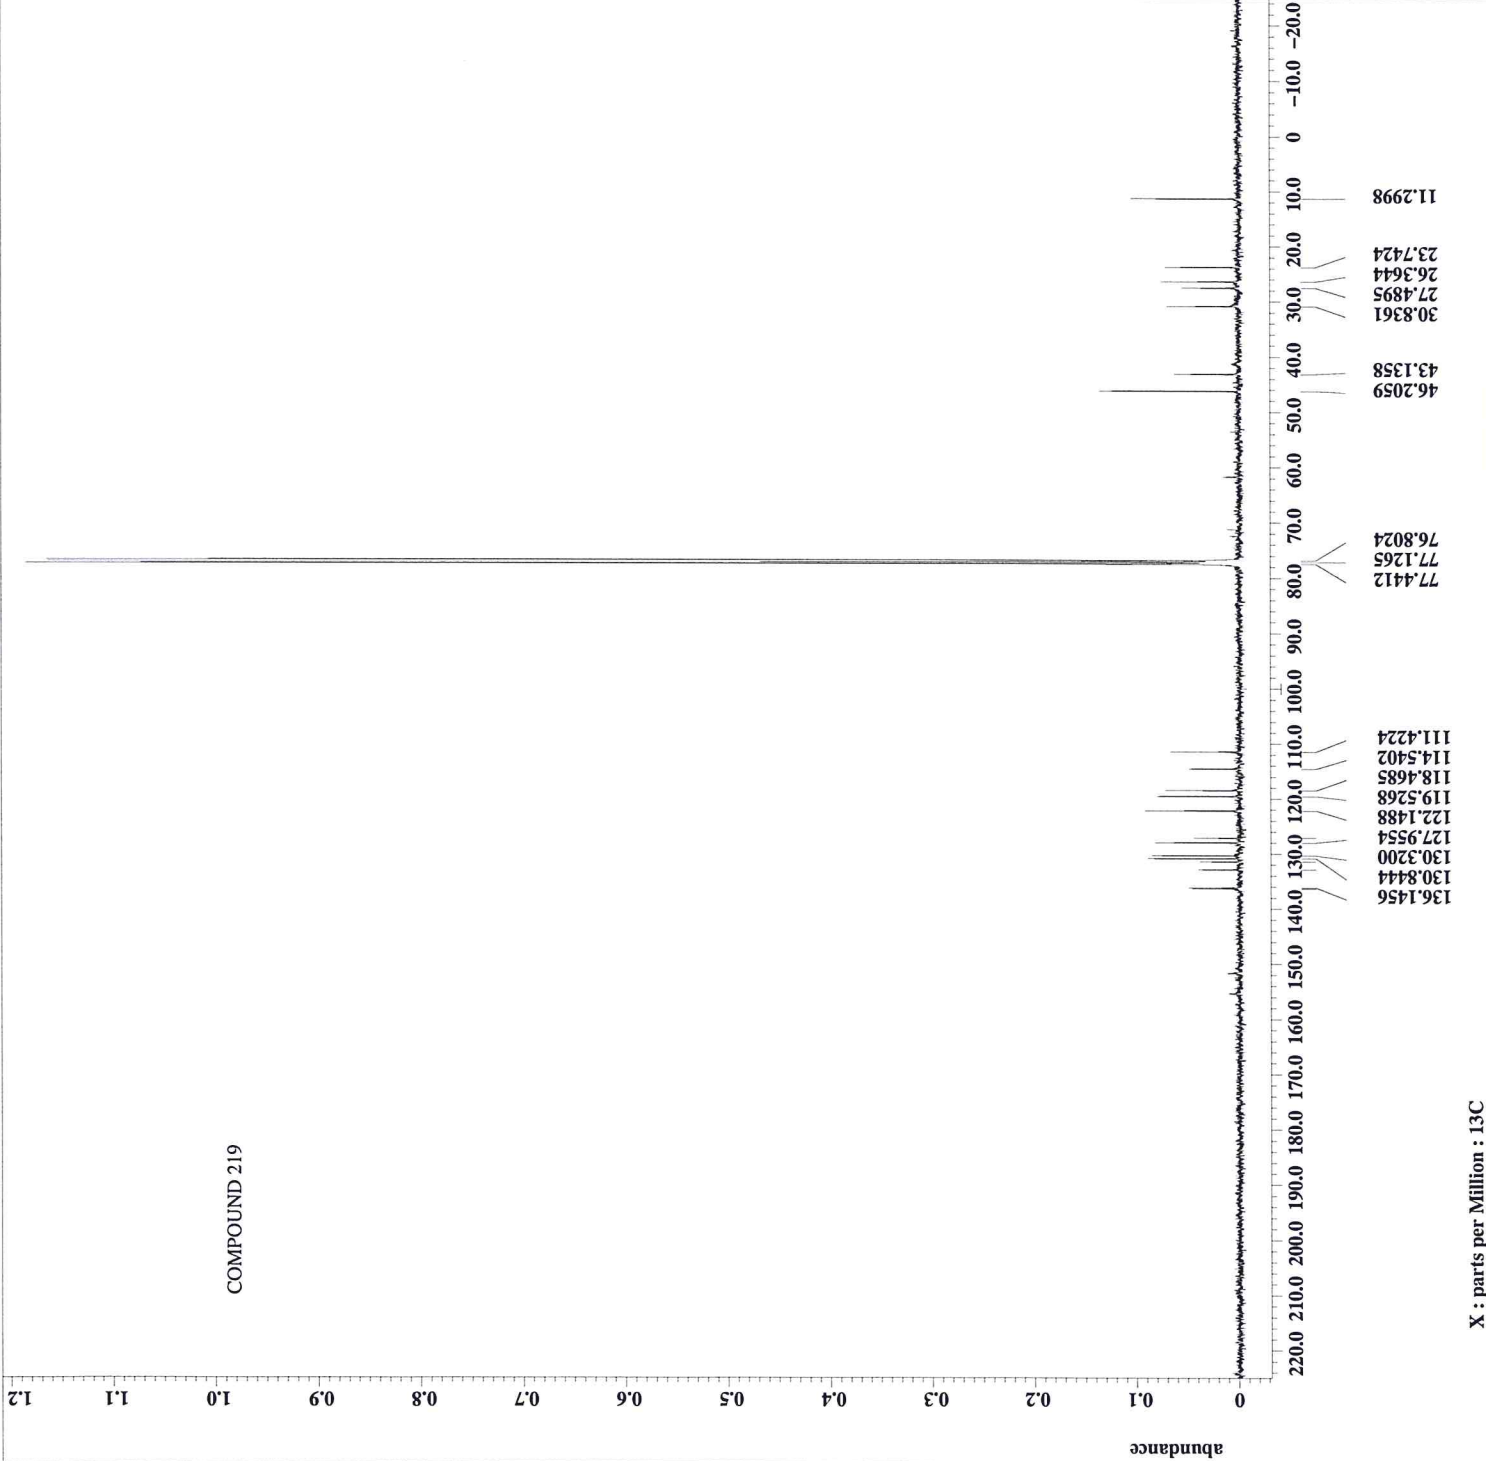

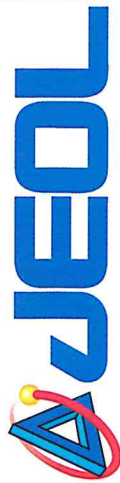

Filename = BN-VI-27B-C\_PROTON-4.  
Author = Neumann  
Experiment = single\_pulse.ex2  
Sample\_id = BN-VI-27B-C  
Solvent = METHANOL-D3  
Creation\_time = 29-JUL-2015 10:37:21  
Revision\_time = 10-MAR-2021 11:08:16  
Current\_time = 10-MAR-2021 11:08:21  
Data\_format = 1D COMPLEX  
Dim\_size = 13107  
Dim\_title = 1H  
Dim\_units = [ppm]  
Dimensions = X  
Site = ECS 400  
Spectrometer = JNM-ECS400  
Field\_strength = 9.389766[T] (400 [MHz])  
X\_acq\_duration = 2.18365952[s]  
X\_domain = 1H  
X\_freq = 399.78219838 [MHz]  
X\_offset = 5 [ppm]  
X\_points = 16384  
X\_prescans = 1  
X\_resolution = 0.45794685 [Hz]  
X\_sweep = 7.5030012 [kHz]  
Irr\_domain = 1H  
Irr\_freq = 399.78219838 [MHz]  
Irr\_offset = 5 [ppm]  
Tri\_domain = 1H  
Tri\_freq = 399.78219838 [MHz]  
Tri\_offset = 5 [ppm]  
Clipped = FALSE  
Mod\_return = 1  
Scans = 16  
Total\_scans = 16  
X\_90\_width = 10.16 [us]  
X\_acq\_time = 2.18365952 [s]  
X\_angle = 45 [deg]  
X\_atn = 6 [dB]  
X\_pulse = 5.08 [us]  
Irr\_mode = Off  
Tri\_mode = Off  
Dante\_presat = FALSE  
Initial\_wait = 1 [s]  
Recvr\_gain = 42  
Relaxation\_delay = 4 [s]  
Repetition\_time = 6.18365952 [s]  
Temp\_get = 19.9 [dC]

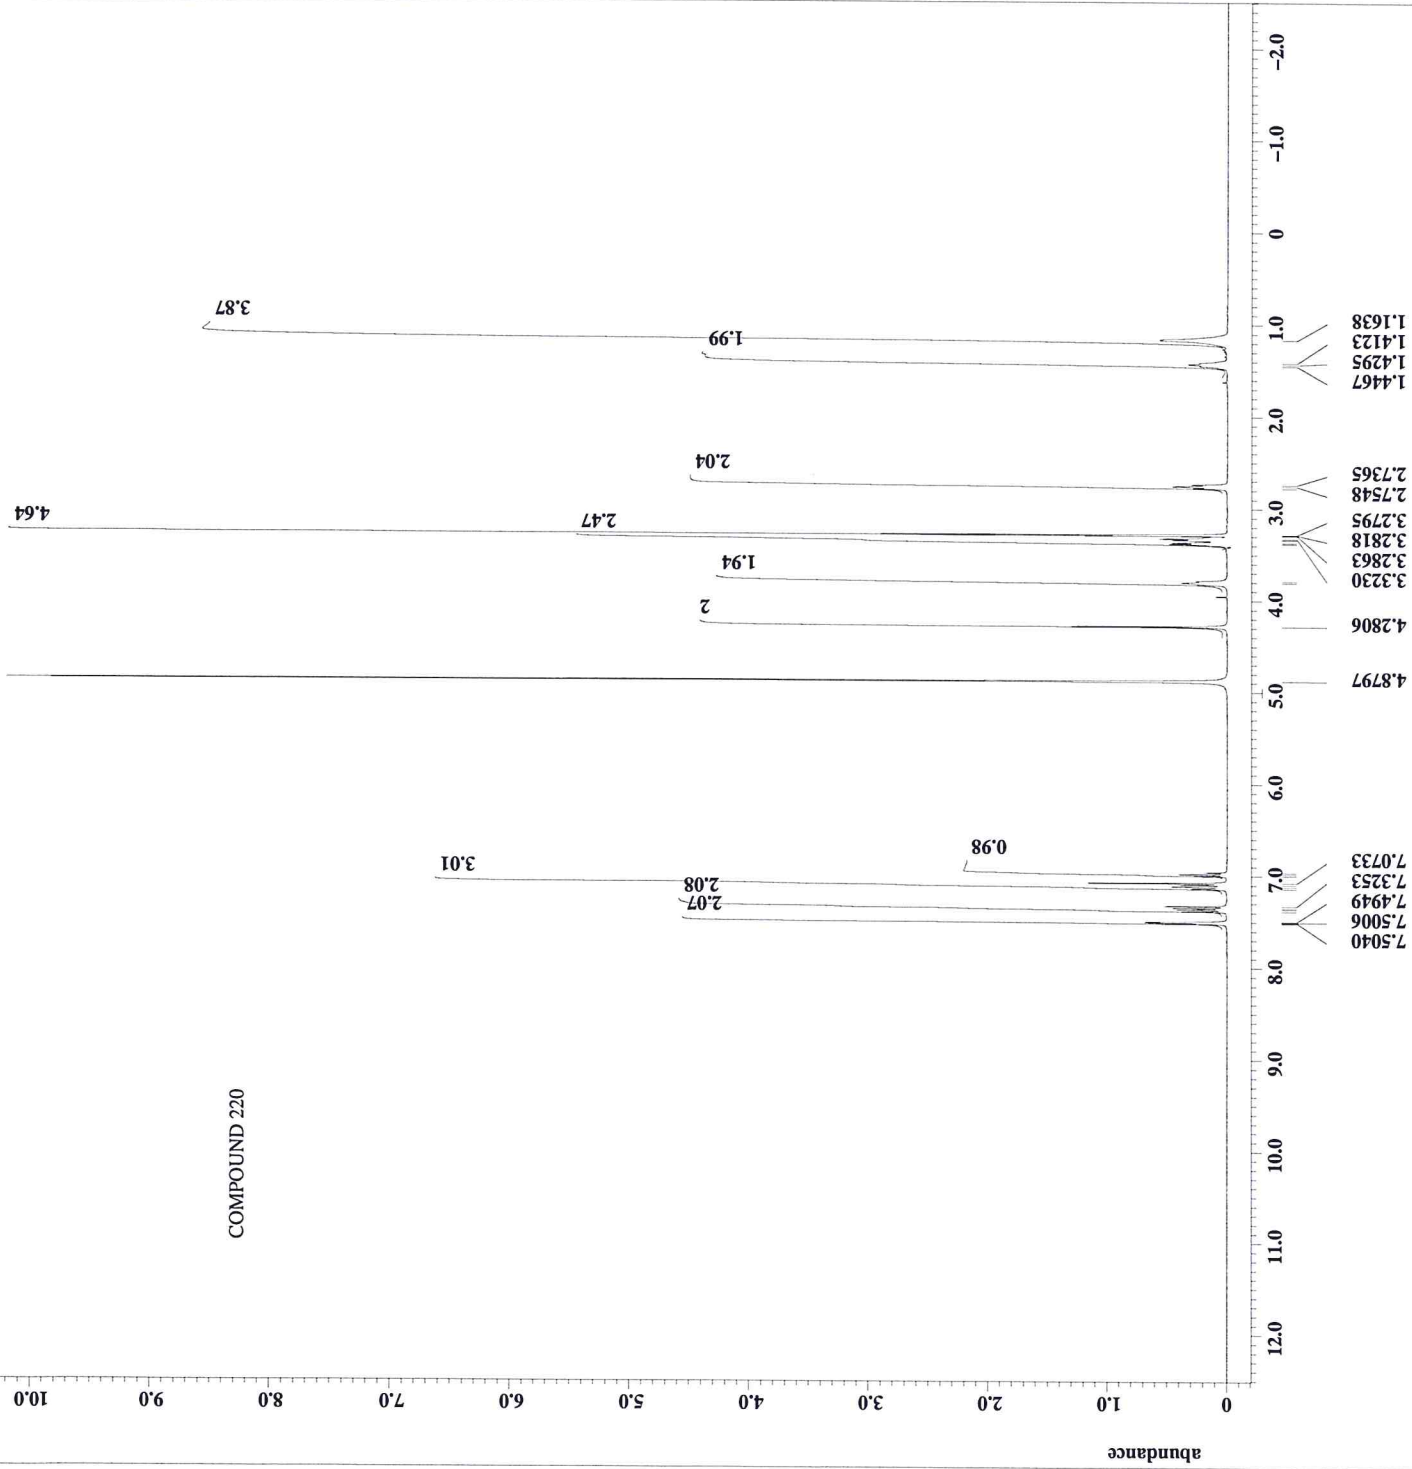

X : parts per Million : 1H



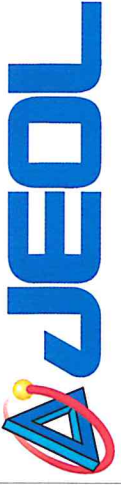

Filename = BN-VI-27B-c CARBON-4.  
Author = Neumann  
Experiment = single\_pulse\_dec  
Sample\_id = BN-VI-27B-C  
Solvent = METHANOL-D3  
Creation\_time = 29-JUL-2015 13:31:38  
Revision\_time = 10-MAR-2021 11:10:12  
Current\_time = 10-MAR-2021 11:10:24  
Data\_format = 1D COMPLEX  
Dim\_size = 26214  
Dim\_title = 13C  
Dim\_units = [ppm]  
Dimensions = X  
Site = ECS 400  
Spectrometer = JNM-ECS400  
Field\_strength = 9.389766[T] (400[MHz])  
X\_acq\_duration = 1.04333312[s]  
X\_domain = 13C  
X\_freq = 100.52530333[MHz]  
X\_offset = 32768  
X\_points = 4  
X\_prescans = 0.95846665[Hz]  
X\_resolution = 31.40703518[KHz]  
X\_sweep = 1K  
Irr\_domain = 399.78219838[MHz]  
Irr\_freq = 5[ppm]  
Clipped = FALSE  
Mod\_return = 1  
Scans = 2048  
Total\_scans = 2048  
X\_90\_width = 12.36[us]  
X\_acq\_time = 1.04333312[s]  
X\_angle = 30[deg]  
X\_atn = 9[db]  
X\_pulse = 4.12[us]  
Irr\_atn\_dec = 27[db]  
Irr\_atn\_noe = 27[db]  
Irr\_noise = WALTZ  
Decoupling = TRUE  
Initial\_wait = 1[s]  
Noe = TRUE  
Noe\_time = 4[s]  
Recvr\_gain = 60  
Relaxation\_delay = 4[s]  
Repetition\_time = 5.04333312[s]  
Temp\_get = 20.2[dc]

COMPOUND 220

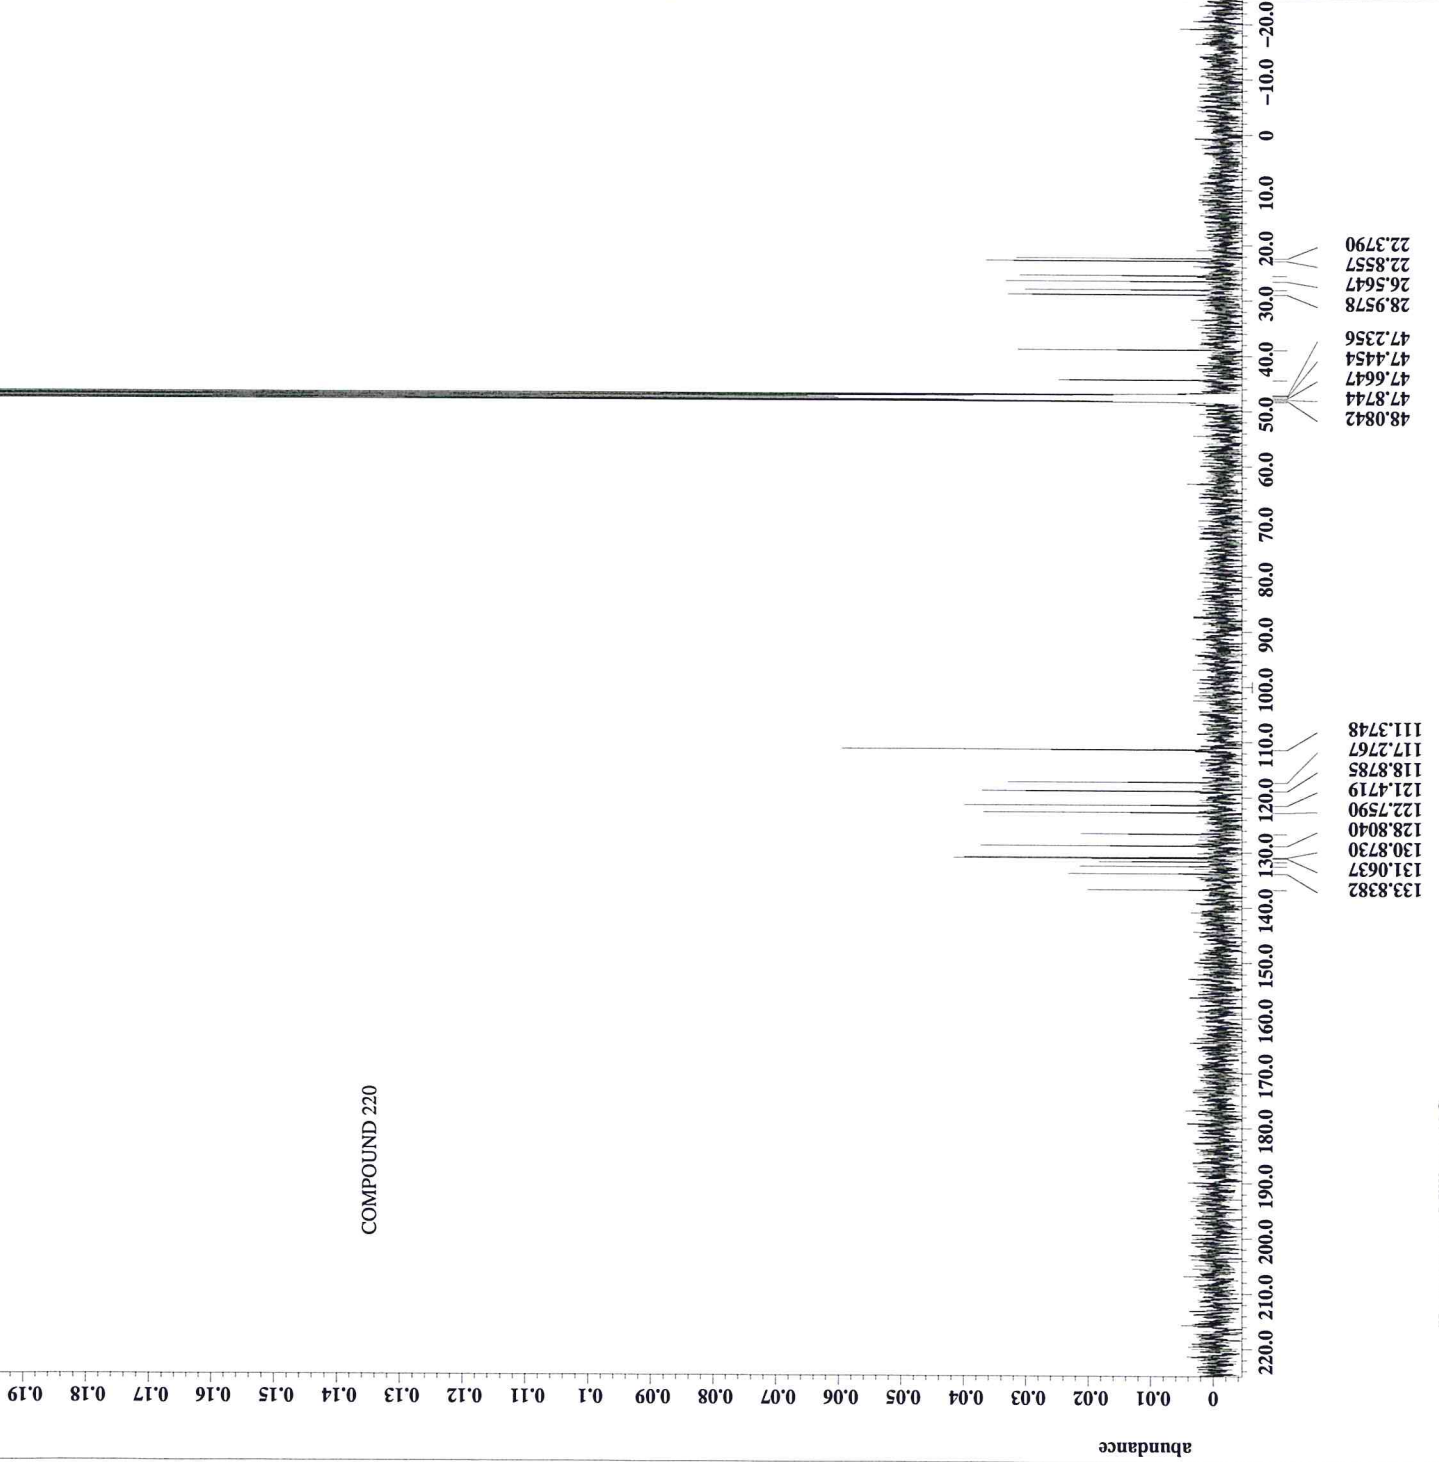

X : parts per Million : 13C

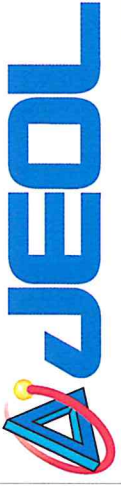

File: ID-102-37-B-5.jdf  
Author: Crider  
Experiment: single\_pulse.ex2  
Sample\_id: S#730831  
Solvent: DMSO-D6  
Creation\_time: 8-JUN-2011 20:05:30  
Revision\_time: 17-MAR-2021 09:46:04  
Current\_time: 17-MAR-2021 09:46:09

Comment: single\_pulse  
Data\_format: 1D COMPLEX  
Dim\_size: 13107  
Dim\_title: 1H  
Dim\_units: [ppm]  
Dimensions: X  
Site: ECS 400  
Spectrometer: JNM-ECS400

Field\_strength: 9.389766[T] (400 [MHz])  
X\_acq\_duration: 2.18365952[s]  
X\_domain: 1H  
X\_freq: 399.78219838 [MHz]  
X\_offset: 5 [ppm]  
X\_points: 16384  
X\_prescans: 1  
X\_resolution: 0.45794685 [Hz]  
X\_sweep: 7.5030012 [kHz]  
Irr\_domain: 1H  
Irr\_freq: 399.78219838 [MHz]  
Irr\_offset: 5 [ppm]  
Tri\_domain: 1H  
Tri\_freq: 399.78219838 [MHz]  
Tri\_offset: 5 [ppm]  
Clipped: FALSE  
Mod\_return: 1  
Scans: 8  
Total\_scans: 8

X\_90\_width: 10.01791 [us]  
X\_acq\_time: 2.18365952 [s]  
X\_angle: 45 [deg]  
X\_atn: 6 [dB]  
X\_pulse: 5.008955 [us]  
Irr\_mode: Off  
Tri\_mode: Off  
Dante\_preset: FALSE  
Initial\_wait: 1 [s]  
Recvr\_gain: 38  
Relaxation\_delay: 5 [s]  
Repetition\_time: 7.18365952 [s]  
Temp\_get: 20.1 [dC]

'COMPOUND 221

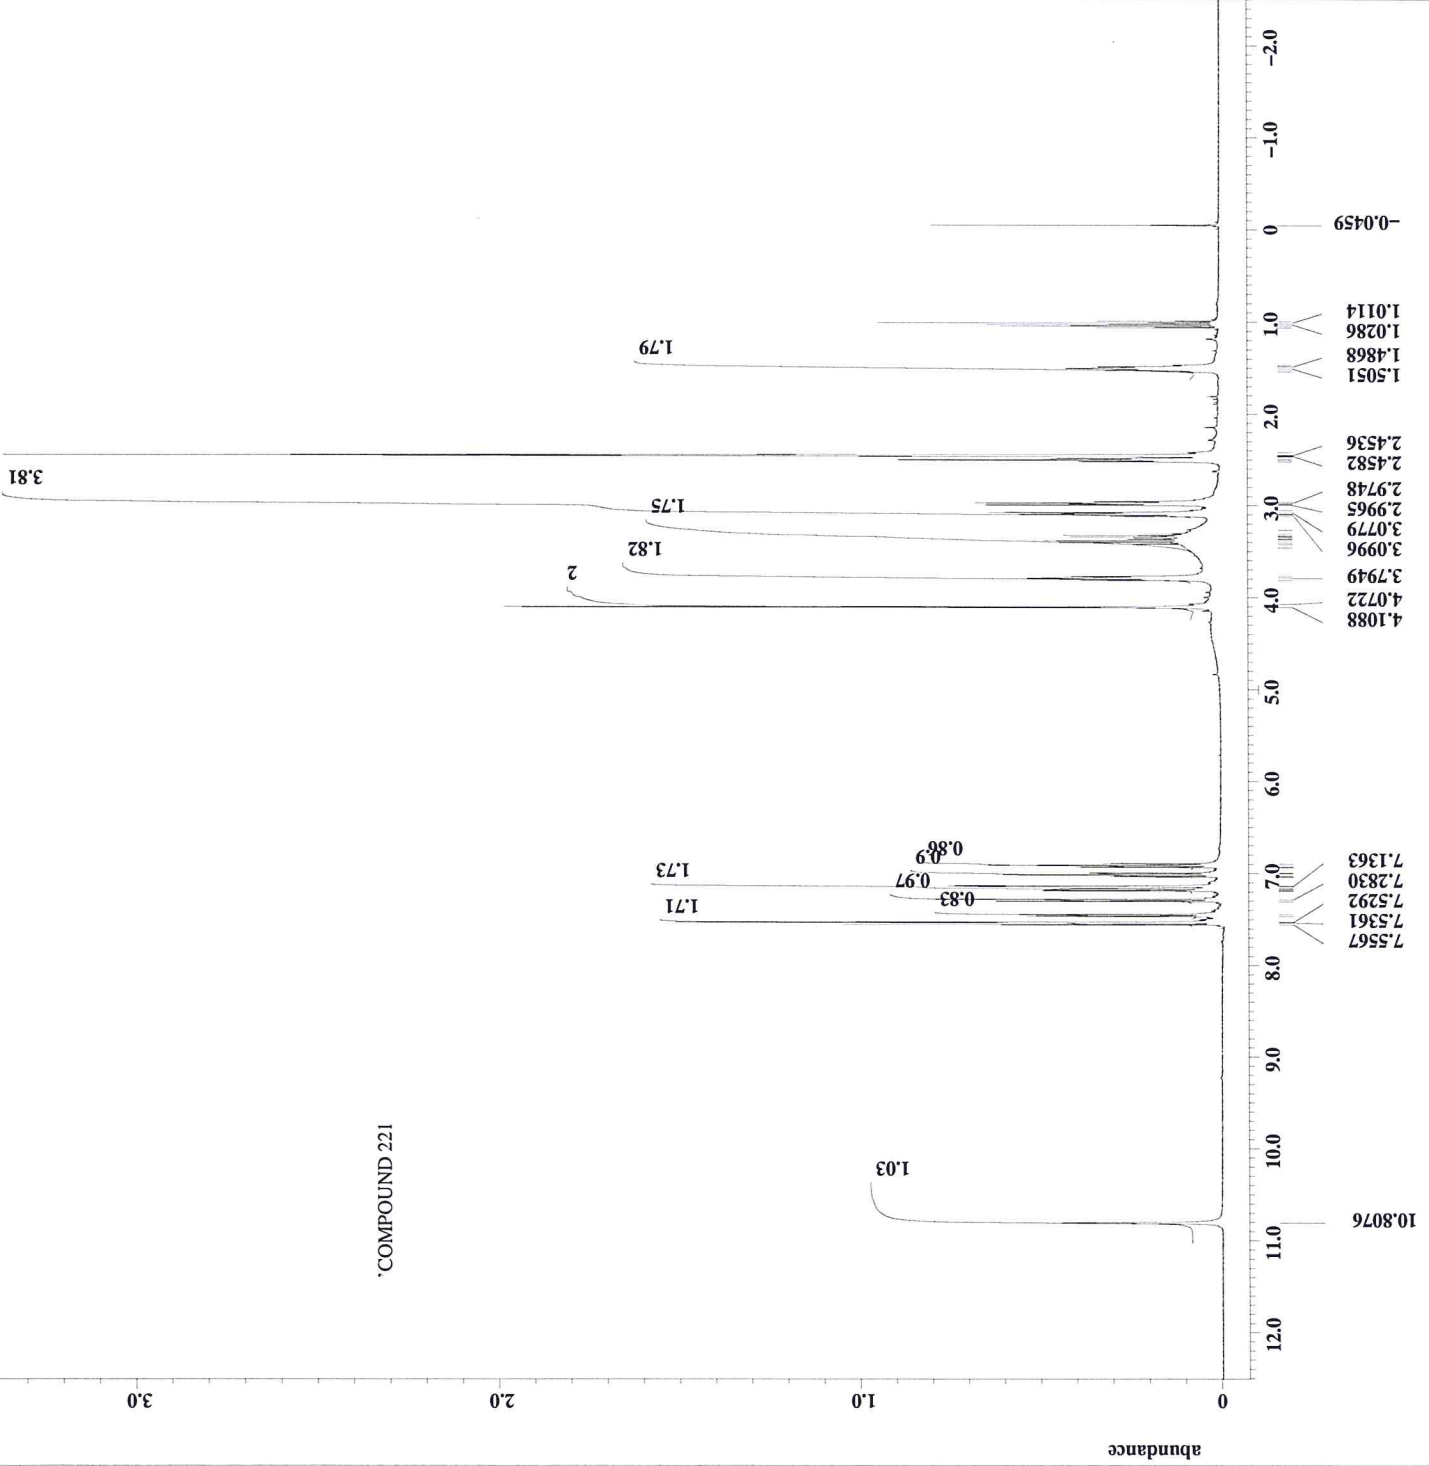

X : parts per Million : 1H

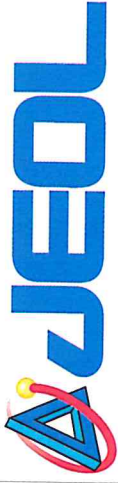

File = ID-102-37-B-5.jdf  
Author = Crider  
Experiment = single\_pulse\_dec  
Sample\_id = S#383557  
Solvent = DMSO-D6  
Creation\_time = 9-JUN-2011 13:53:10  
Revision\_time = 17-MAR-2021 09:39:12  
Current\_time = 17-MAR-2021 09:39:16  
Comment = single pulse decouple  
Data\_format = 1D\_COMPLEX  
Dim\_size = 26214  
Dim\_title = 13C  
Dim\_units = [ppm]  
Dimensions = X  
Site = ECS 400  
Spectrometer = JNM-ECS400  
Field\_strength = 9.389766[T] (400 [MHz])  
X\_acq\_duration = 1.04333312[s]  
X\_domain = 13C  
X\_freq = 100.52530333 [MHz]  
X\_offset = 100 [ppm]  
X\_points = 32768  
X\_prescans = 4  
X\_resolution = 0.95846665 [Hz]  
X\_sweep = 31.40703518 [kHz]  
Irr\_domain = 1H  
Irr\_freq = 399.78219838 [MHz]  
Irr\_offset = 5 [ppm]  
Clipped = FALSE  
Mod\_return = 1  
Scans = 4096  
Total\_scans = 4096  
X\_90\_width = 11.9 [us]  
X\_acq\_time = 1.04333312 [s]  
X\_angle = 30 [deg]  
X\_atn = 9 [dB]  
X\_pulse = 3.96666667 [us]  
Irr\_atn\_dec = 27 [dB]  
Irr\_atn\_noe = 27 [dB]  
Irr\_noise = WALTZ  
Decoupling = TRUE  
Initial\_wait = 1 [s]  
Noe = TRUE  
Noe\_time = 2 [s]  
Recvr\_gain = 60  
Relaxation\_delay = 2 [s]  
Repetition\_time = 3.04333312 [s]  
Temp\_get = 19.7 [dC]

Compound 221

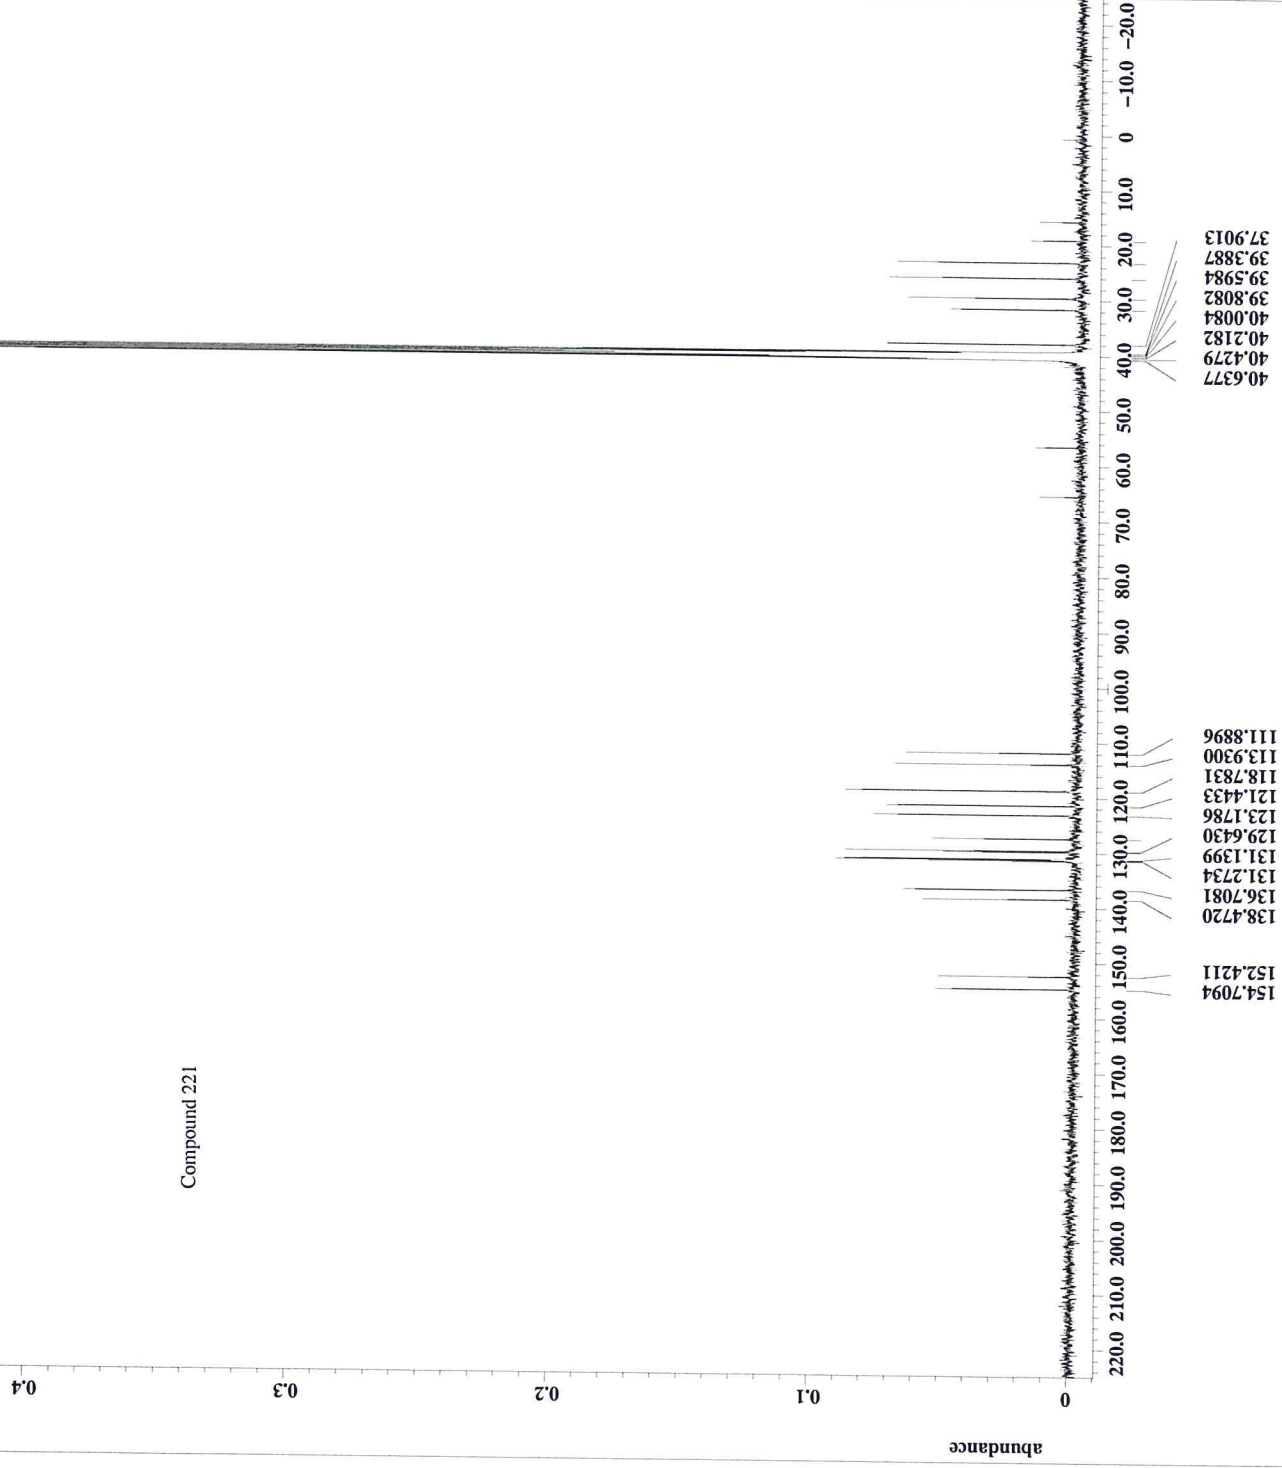

X : parts per Million : 13C
